# Supplementary material for: Transcriptional profiling and biomarker identification reveal tissue specific effects of expanded ataxin-3 in a spinocerebellar ataxia type 3 mouse model
Source: PubMed Central journal article supplement (PMC6013885; doi:10.1186/s13024-018-0261-9), 2018-06-22

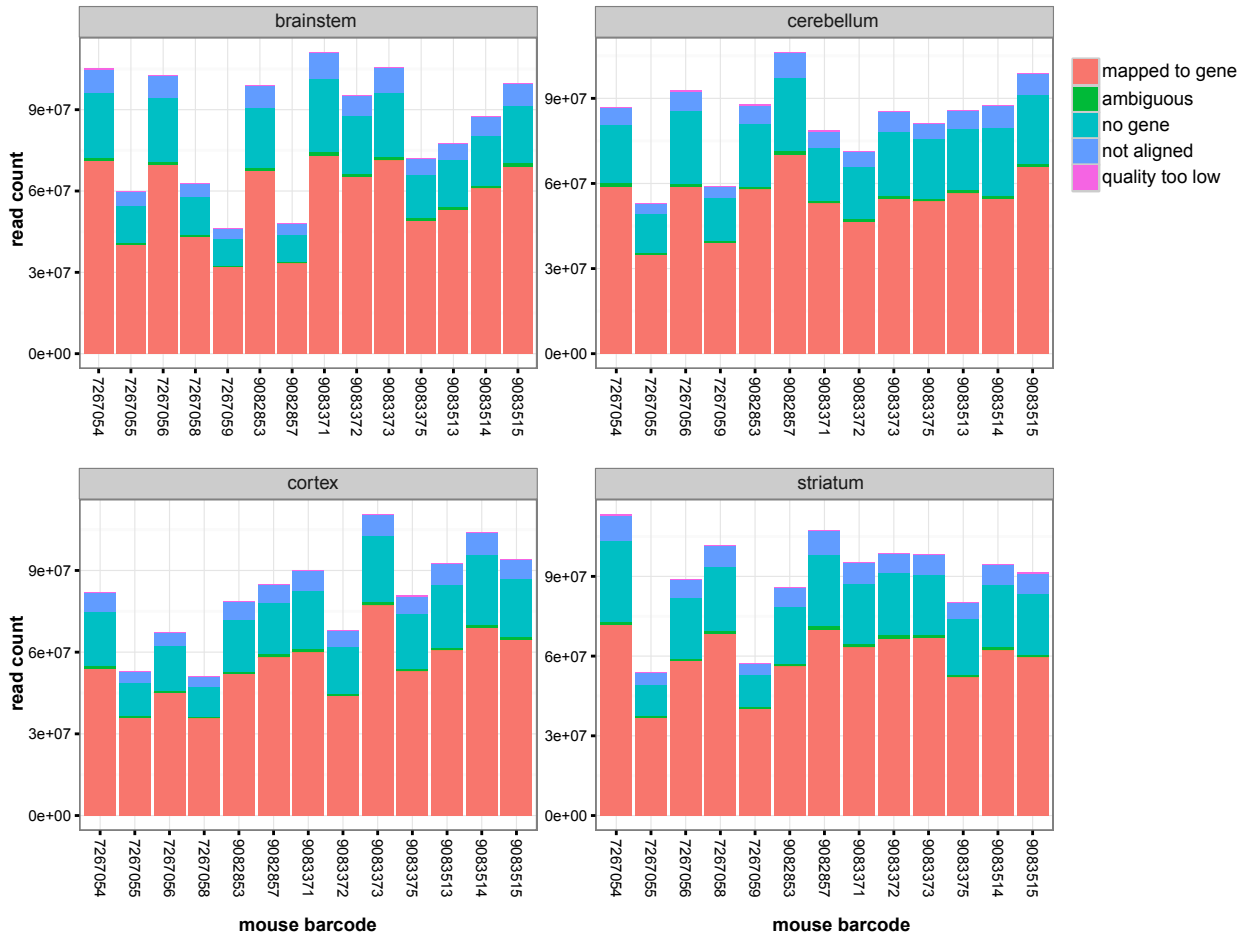

Supplement: 13024_2018_261_MOESM2_ESM.pdf [file 13024_2018_261_MOESM2_ESM.pdf]
