# Supplementary material for: Transcriptional profiling and biomarker identification reveal tissue specific effects of expanded ataxin-3 in a spinocerebellar ataxia type 3 mouse model
Source: Mol Neurodegener. 2018 Jun 22;13:31. doi: 10.1186/s13024-018-0261-9 (PMC6013885; doi:10.1186/s13024-018-0261-9)
Supplement: Supplementary file 5 — Canonical pathways ingenuity. (XLSX 257 kb) [file 13024_2018_261_MOESM5_ESM.xlsx]

## Sheet: combined brain regions
Ingenuity pathway analysis combined brain regions (585 genes)
© 2000-2017 QIAGEN. All rights reserved.
Analysis Settings
Cutoff before duplicate resolution	TRUE
Resolve duplicate on	Expression logfoldchange
Color using	Expression logfoldchange
Cutoff for Expression logfoldchange	--
Cutoff for Expression intensity	--
Cutoff for Expression pvalue	--
Cutoff for Expression qvalue	0.05
Reference set	Ingenuity Knowledge Base (Genes Only)
Relationship to include	Direct and Indirect
Includes Endogenous Chemicals	Yes
confidence = Experimentally Observed
Ingenuity Canonical Pathways	p-value	zScore	Ratio	Molecules
α-Adrenergic Signaling	1.23027e-05	-1.26491	0.126	PYGM,PRKCQ,GNAS,ADRA2A,PRKCD,ADCY6,PYGB,SLC8A1,ADCY8,GNG12,PHKG1
CREB Signaling in Neurons	1.94984e-05	-2.13809	0.087	GRM7,FGFR3,PLCB4,PRKCQ,GNAS,POLR2A,GRM3,GRIN2D,PRKCD,CREB3,ADCY6,FGFR2,RPS6KA1,ADCY8,PLCD4,GNG12
Protein Kinase A Signaling	2.5704e-05	-0.654654	0.0638	ENPP6,HIST1H1C,PPP1R14C,PRKCQ,GNAS,PPP1R3C,CREB3,ADCY6,PYGB,DUSP15,PTPN3,AKAP11,PDE8A,PLCB4,NFKBIA,PYGM,NFAT5,NGFR,PRKCD,ANAPC5,TNNI1,ADCY8,PLCD4,GNG12,PHKG1
Axonal Guidance Signaling	3.63078e-05	NaN	0.06	TUBA1B,FYN,PLXNA3,ARPC1B,UNC5B,FZD1,FGFR3,SEMA6D,NFAT5,SEMA3D,NGFR,ABLIM3,ROBO2,PLXNB3,PLCD4,GNG12,GNAS,PRKCQ,FGFR2,FZD9,HHIP,PLCB4,SEMA4D,ARPC1A,PRKCD,SEMA4G,GLI1
Synaptic Long Term Potentiation	5.49541e-05	-0.57735	0.1	GRM7,PPP1R14C,PLCB4,PRKCQ,GRM3,PPP1R3C,GRIN2D,PRKCD,CREB3,RPS6KA1,ADCY8,PLCD4
Superpathway of Cholesterol Biosynthesis	6.0256e-05	NaN	0.214	MVD,DHCR7,IDI1,MSMO1,HMGCS1,CYP51A1
Dopamine-DARPP32 Feedback in cAMP Signaling	6.91831e-05	0.534522	0.0864	PPP1R14C,PLCB4,PRKCQ,GNAS,CACNA1E,PPP2R2A,PPP1R3C,GRIN2D,PRKCD,CREB3,ADCY6,KCNJ16,ADCY8,PLCD4
G-Protein Coupled Receptor Signaling	7.24436e-05	NaN	0.0699	ENPP6,FYN,GNAS,GRM3,CREB3,ADCY6,PDPK1,FGFR2,S1PR3,PDE8A,FGFR3,GRM7,LAMTOR3,PLCB4,NFKBIA,ADRA2A,S1PR1,RPS6KA1,ADCY8
Endothelin-1 Signaling	8.91251e-05	-0.258199	0.0802	GNAS,PRKCQ,EDNRB,ABHD3,ADCY6,FGFR2,PLA2G7,PLD1,FGFR3,PLA2G4A,PLCB4,PRKCD,ADCY8,PLCD4,PAFAH1B3
Synaptic Long Term Depression	9.12011e-05	-1.38675	0.089	GRM7,PLA2G4A,PLCB4,PRKCQ,GNAS,GRM3,PPP2R2A,ABHD3,NPR1,PRKCD,PLCD4,PLA2G7,PAFAH1B3
mTOR Signaling	0.000177828	-0.301511	0.0754	PRKCQ,PPP2R2A,RPS10,RPS6KA3,FGFR2,PDPK1,PLD1,FGFR3,RHOG,PRKCD,EIF3I,RPS6KA1,FNBP1,RPS14,RPS24
Cardiac β-adrenergic Signaling	0.000199526	-0.333333	0.0876	ENPP6,PDE8A,PPP1R14C,GNAS,CACNA1E,PPP2R2A,PPP1R3C,ADCY6,SLC8A1,ADCY8,GNG12,AKAP11
fMLP Signaling in Neutrophils	0.000263027	0.632456	0.0909	FGFR3,PLCB4,NFKBIA,ARPC1A,PRKCQ,GNAS,NFAT5,ARPC1B,PRKCD,FGFR2,GNG12
Antioxidant Action of Vitamin C	0.000288403	-0.333333	0.0971	PLA2G4A,PLCB4,NFKBIA,CSF2RA,ABHD3,PLCD4,PLA2G7,GSTO1,PLD1,PAFAH1B3
Sperm Motility	0.000346737	-0.632456	0.088	CACNA1G,PLA2G4A,PLCB4,PRKCQ,GNAS,ABHD3,NPR1,PRKCD,PLCD4,PLA2G7,PAFAH1B3
Phospholipase C Signaling	0.000389045	1.26491	0.0675	FYN,GNAS,PRKCQ,CREB3,RPS6KA3,ADCY6,PLD1,PLA2G4A,PLCB4,NFAT5,RHOG,PRKCD,ADCY8,ARHGEF10,FNBP1,GNG12
Glutamate Receptor Signaling	0.00057544	NaN	0.123	GRM7,SLC1A6,HOMER2,GRM3,GRIN2D,SLC1A2,GLUL
Melanocyte Development and Pigmentation Signaling	0.000691831	-1.66667	0.0947	FGFR3,GNAS,MITF,CREB3,RPS6KA3,ADCY6,FGFR2,RPS6KA1,ADCY8
Breast Cancer Regulation by Stathmin1	0.000707946	NaN	0.069	TUBA1B,PPP1R14C,GNAS,PRKCQ,PPP2R2A,PPP1R3C,ADCY6,FGFR2,FGFR3,PLCB4,PRKCD,ADCY8,ARHGEF10,GNG12
Thrombin Signaling	0.000707946	0.27735	0.069	GNAS,PRKCQ,ADCY6,PDPK1,FGFR2,FGFR3,PLCB4,RHOG,PRKCD,ADCY8,PLCD4,ARHGEF10,FNBP1,GNG12
Glutathione-mediated Detoxification	0.00074131	NaN	0.172	Gstt3,GSTM2,Gstt1,GSTO1,GSTP1
NGF Signaling	0.000794328	-0.632456	0.0855	TRAF6,FGFR3,RHOG,NGFR,PRKCD,CREB3,RPS6KA3,PDPK1,FGFR2,RPS6KA1
Phospholipases	0.000954993	NaN	0.113	PLA2G4A,PLCB4,ABHD3,PLCD4,PLA2G7,PLD1,PAFAH1B3
Sphingosine-1-phosphate Signaling	0.0011749	-1.26491	0.0813	S1PR3,FGFR3,PLCB4,RHOG,S1PR1,ADCY6,FGFR2,ADCY8,PLCD4,FNBP1
Production of Nitric Oxide and Reactive Oxygen Species in Macrophages	0.00134896	-0.83205	0.0674	PPP1R14C,APOE,PRKCQ,PPP2R2A,PPP1R3C,FGFR2,FGFR3,NFKBIA,RHOG,PRKCD,NGFR,FNBP1,CLU
GPCR-Mediated Nutrient Sensing in Enteroendocrine Cells	0.00141254	NaN	0.0941	PLCB4,PRKCQ,GNAS,PRKCD,ADCY6,ADCY8,PLCD4,GNG12
cAMP-mediated signaling	0.0017378	-2.88675	0.0628	S1PR3,GRM7,ENPP6,PDE8A,LAMTOR3,GNAS,ADRA2A,GRM3,CREB3,S1PR1,ADCY6,RPS6KA1,ADCY8,AKAP11
P2Y Purigenic Receptor Signaling Pathway	0.00199526	-1	0.0758	FGFR3,PLCB4,PRKCQ,PRKCD,CREB3,ADCY6,FGFR2,ADCY8,PLCD4,GNG12
Neuropathic Pain Signaling In Dorsal Horn Neurons	0.00251189	-1	0.0789	GRM7,FGFR3,PLCB4,PRKCQ,GRM3,GRIN2D,PRKCD,FGFR2,PLCD4
Gαq Signaling	0.00263027	-0.333333	0.0688	FGFR3,PLCB4,NFKBIA,PRKCQ,RHOG,GNAS,PRKCD,FGFR2,GNG12,FNBP1,PLD1
Wnt/Ca+ pathway	0.00316228	0	0.105	PLCB4,NFAT5,CREB3,FZD9,FZD1,PLCD4
Neurotrophin/TRK Signaling	0.00316228	-1.88982	0.0921	FGFR3,SPRY1,NGFR,CREB3,PDPK1,FGFR2,RPS6KA1
CXCR4 Signaling	0.00331131	0	0.0667	FGFR3,PLCB4,PRKCQ,RHOG,GNAS,PRKCD,ADCY6,FGFR2,ADCY8,GNG12,FNBP1
Gαi Signaling	0.00354813	-1.13389	0.075	S1PR3,GRM7,GNAS,ADRA2A,GRM3,S1PR1,ADCY6,ADCY8,GNG12
Arsenate Detoxification I (Glutaredoxin)	0.00371535	NaN	0.5	PNP,GSTO1
Cholesterol Biosynthesis I	0.00380189	NaN	0.231	DHCR7,MSMO1,CYP51A1
Cholesterol Biosynthesis II (via 24,25-dihydrolanosterol)	0.00380189	NaN	0.231	DHCR7,MSMO1,CYP51A1
Cholesterol Biosynthesis III (via Desmosterol)	0.00380189	NaN	0.231	DHCR7,MSMO1,CYP51A1
Mevalonate Pathway I	0.00380189	NaN	0.231	MVD,IDI1,HMGCS1
Oleate Biosynthesis II (Animals)	0.00380189	NaN	0.231	FADS2,Scd2,FADS1
Gap Junction Signaling	0.00380189	NaN	0.0655	FGFR3,TUBA1B,PLCB4,PRKCQ,GNAS,NPR1,PRKCD,ADCY6,FGFR2,ADCY8,PLCD4
Growth Hormone Signaling	0.00446684	0.377964	0.0864	FGFR3,PRKCQ,PRKCD,RPS6KA3,PDPK1,FGFR2,RPS6KA1
ERK/MAPK Signaling	0.00501187	0.301511	0.0603	FGFR3,LAMTOR3,PLA2G4A,FYN,PPP1R14C,PPP2R2A,PPP1R3C,PRKCD,CREB3,FGFR2,RPS6KA1,ELF1
Relaxin Signaling	0.00549541	-2.64575	0.0658	FGFR3,ENPP6,PDE8A,NFKBIA,GNAS,NPR1,ADCY6,FGFR2,ADCY8,GNG12
CD28 Signaling in T Helper Cells	0.00630957	1.41421	0.0687	FGFR3,FYN,NFKBIA,ARPC1A,PRKCQ,NFAT5,ARPC1B,PDPK1,FGFR2
p70S6K Signaling	0.00630957	0.333333	0.0687	FGFR3,PLCB4,PRKCQ,PPP2R2A,PRKCD,PDPK1,FGFR2,PLCD4,PLD1
nNOS Signaling in Neurons	0.00660693	NaN	0.106	CAPN5,PRKCQ,GRIN2D,PRKCD,RASD1
Cardiac Hypertrophy Signaling	0.00724436	-2.3094	0.0553	FGFR3,PLCB4,RHOG,GNAS,CACNA1E,ADRA2A,ADCY6,FGFR2,RPS6KA1,ADCY8,PLCD4,GNG12,FNBP1
Molecular Mechanisms of Cancer	0.0074131	NaN	0.0481	FYN,PRKCQ,GNAS,ADCY6,FGFR2,FZD9,FZD1,FGFR3,LAMTOR3,PLCB4,NFKBIA,RHOG,PRKCD,ADCY8,ARHGEF10,NOTCH1,GLI1,FNBP1
Corticotropin Releasing Hormone Signaling	0.0074131	-1.41421	0.0721	PRKCQ,GNAS,NPR1,PRKCD,CREB3,ADCY6,ADCY8,GLI1
Superpathway of Geranylgeranyldiphosphate Biosynthesis I (via Mevalonate)	0.00851138	NaN	0.176	MVD,IDI1,HMGCS1
γ-linolenate Biosynthesis II (Animals)	0.00851138	NaN	0.176	ACSL6,FADS2,FADS1
Zymosterol Biosynthesis	0.00891251	NaN	0.333	MSMO1,CYP51A1
Reelin Signaling in Neurons	0.00891251	NaN	0.0761	FGFR3,APOE,FYN,FGFR2,LRP8,ARHGEF10,PAFAH1B3
Dendritic Cell Maturation	0.00933254	-0.301511	0.0579	TRAF6,FGFR3,IL33,PLCB4,NFKBIA,DDR2,NGFR,CREB3,COL2A1,FGFR2,PLCD4
Role of NFAT in Cardiac Hypertrophy	0.0102329	-0.632456	0.0573	FGFR3,PLCB4,PRKCQ,GNAS,PRKCD,ADCY6,FGFR2,SLC8A1,ADCY8,PLCD4,GNG12
Signaling by Rho Family GTPases	0.0107152	-0.57735	0.0526	FGFR3,ARPC1A,RHOG,GNAS,ARPC1B,FGFR2,CDC42EP4,CDC42EP2,ARHGEF10,GNG12,FNBP1,PLD1,CDH19
LPS/IL-1 Mediated Inhibition of RXR Function	0.0114815	NaN	0.0541	TRAF6,IL33,APOE,ALDH1L1,GSTM2,NGFR,ACSL6,CHST3,HS3ST1,HMGCS1,GSTO1,GSTP1
IL-8 Signaling	0.0120226	0	0.0558	TRAF6,FGFR3,PRKCQ,RHOG,GNAS,PRKCD,FGFR2,MAP4K4,GNG12,FNBP1,PLD1
Phagosome Formation	0.0125893	NaN	0.0656	FGFR3,PLCB4,PRKCQ,RHOG,PRKCD,FGFR2,PLCD4,FNBP1
CDK5 Signaling	0.0131826	-0.377964	0.0707	PPP1R14C,GNAS,PPP2R2A,PPP1R3C,NGFR,ADCY6,ADCY8
Dopamine Receptor Signaling	0.0134896	0	0.0779	PPP1R14C,PPP2R2A,PPP1R3C,ADCY6,ADCY8,QDPR
UVA-Induced MAPK Signaling	0.0151356	-1.13389	0.0686	FGFR3,PLCB4,PARP16,RPS6KA3,FGFR2,RPS6KA1,PLCD4
Erythropoietin Signaling	0.0151356	NaN	0.0759	FGFR3,NFKBIA,PRKCQ,PRKCD,PDPK1,FGFR2
Atherosclerosis Signaling	0.0158489	NaN	0.063	IL33,APOE,PLA2G4A,ABHD3,COL2A1,PLA2G7,CLU,PAFAH1B3
Type II Diabetes Mellitus Signaling	0.0158489	0.377964	0.063	FGFR3,NFKBIA,PRKCQ,NGFR,PRKCD,ACSL6,PDPK1,FGFR2
Glutathione Redox Reactions I	0.017378	NaN	0.136	GSTM2,Gstt1,GSTP1
14-3-3-mediated Signaling	0.0177828	NaN	0.0615	FGFR3,TUBA1B,PLCB4,PRKCQ,PRKCD,FGFR2,RPS6KA1,PLCD4
CCR3 Signaling in Eosinophils	0.0177828	NaN	0.0615	FGFR3,PLA2G4A,PLCB4,PRKCQ,GNAS,PRKCD,FGFR2,GNG12
Prolactin Signaling	0.0190546	0.816497	0.0723	FGFR3,FYN,PRKCQ,PRKCD,PDPK1,FGFR2
Glioblastoma Multiforme Signaling	0.0204174	-1	0.0566	FGFR3,PLCB4,RHOG,PRKCD,FGFR2,FZD9,FZD1,PLCD4,FNBP1
Adipogenesis pathway	0.020893	NaN	0.0597	FGFR3,CTNNBIP1,ZNF423,CTBP2,FGFR2,FZD9,RPS6KA1,FZD1
FLT3 Signaling in Hematopoietic Progenitor Cells	0.020893	NaN	0.0706	FGFR3,CREB3,RPS6KA3,PDPK1,FGFR2,RPS6KA1
Leptin Signaling in Obesity	0.020893	NaN	0.0706	FGFR3,PLCB4,ADCY6,FGFR2,ADCY8,PLCD4
NF-κB Activation by Viruses	0.0223872	-0.447214	0.0698	FGFR3,CCR5,NFKBIA,PRKCQ,PRKCD,FGFR2
Amyotrophic Lateral Sclerosis Signaling	0.0229087	NaN	0.0631	FGFR3,CAPN5,CACNA1E,GRIN2D,FGFR2,SLC1A2,GLUL
Glutamine Biosynthesis I	0.0251189	NaN	1	GLUL,
Xanthine and Xanthosine Salvage	0.0251189	NaN	1	PNP,
Role of IL-17F in Allergic Inflammatory Airway Diseases	0.0251189	0	0.0909	TRAF6,CREB3,RPS6KA3,RPS6KA1
UVB-Induced MAPK Signaling	0.025704	0.447214	0.0758	FGFR3,PRKCQ,PRKCD,RPS6KA3,FGFR2
Role of Macrophages, Fibroblasts and Endothelial Cells in Rheumatoid Arthritis	0.0269153	NaN	0.0453	PRKCQ,CREB3,FGFR2,FZD9,FZD1,IL33,FGFR3,TRAF6,PLCB4,NFKBIA,NFAT5,PRKCD,NGFR,PLCD4
Lymphotoxin β Receptor Signaling	0.0275423	-0.447214	0.0746	TRAF6,FGFR3,NFKBIA,PDPK1,FGFR2
IL-1 Signaling	0.0281838	-0.447214	0.0659	TRAF6,NFKBIA,GNAS,ADCY6,ADCY8,GNG12
IL-10 Signaling	0.0288403	NaN	0.0735	TRAF6,IL33,CCR5,NFKBIA,MAP4K4
Tec Kinase Signaling	0.0295121	-0.707107	0.0529	FGFR3,FYN,PRKCQ,RHOG,GNAS,PRKCD,FGFR2,GNG12,FNBP1
Human Embryonic Stem Cell Pluripotency	0.0295121	NaN	0.0559	S1PR3,FGFR3,GNAS,S1PR1,PDPK1,FGFR2,FZD9,FZD1
Ceramide Signaling	0.030903	0	0.0645	S1PR3,FGFR3,PPP2R2A,NGFR,S1PR1,FGFR2
Fcγ Receptor-mediated Phagocytosis in Macrophages and Monocytes	0.030903	2.44949	0.0645	FYN,ARPC1A,PRKCQ,ARPC1B,PRKCD,PLD1
CCR5 Signaling in Macrophages	0.030903	NaN	0.0725	CCR5,PRKCQ,GNAS,PRKCD,GNG12
Prostate Cancer Signaling	0.0323594	NaN	0.0638	FGFR3,NFKBIA,CREB3,PDPK1,FGFR2,GSTP1
Xenobiotic Metabolism Signaling	0.0323594	NaN	0.0453	PRKCQ,PPP2R2A,FGFR2,UGT8,GSTO1,FGFR3,ALDH1L1,GSTM2,PRKCD,KEAP1,CHST3,HS3ST1,GSTP1
Fc Epsilon RI Signaling	0.0323594	NaN	0.0588	FGFR3,PLA2G4A,FYN,PRKCQ,PRKCD,PDPK1,FGFR2
Germ Cell-Sertoli Cell Junction Signaling	0.0331131	NaN	0.052	FGFR3,TUBA1B,EPN2,RHOG,KEAP1,PDPK1,FGFR2,PLS1,FNBP1
RhoGDI Signaling	0.0331131	-0.707107	0.052	ARPC1A,RHOG,GNAS,WASF2,ARPC1B,ARHGEF10,GNG12,FNBP1,CDH19
Glycogen Degradation II	0.0354813	NaN	0.167	PYGM,PYGB
ErbB4 Signaling	0.0363078	0.447214	0.0694	FGFR3,PRKCQ,PRKCD,PDPK1,FGFR2
GPCR-Mediated Integration of Enteroendocrine Signaling Exemplified by an L Cell	0.0363078	NaN	0.0694	PLCB4,GNAS,ADCY6,ADCY8,PLCD4
FAK Signaling	0.040738	NaN	0.0606	FGFR3,CAPN5,FYN,PDPK1,FGFR2,TNS1
Cholecystokinin/Gastrin-mediated Signaling	0.0436516	0	0.0594	IL33,PLCB4,PRKCQ,RHOG,PRKCD,FNBP1
IL-6 Signaling	0.0436516	-0.377964	0.0551	TRAF6,FGFR3,IL33,NFKBIA,NGFR,FGFR2,MAP4K4
eNOS Signaling	0.0446684	-0.707107	0.0516	FGFR3,PRKCQ,GNAS,PRKCD,ADCY6,PDPK1,FGFR2,ADCY8
Hepatic Fibrosis / Hepatic Stellate Cell Activation	0.0446684	NaN	0.0492	CCR5,EDNRB,COL6A3,NGFR,COL9A3,COL2A1,FGFR2,COL9A2,COL15A1
Semaphorin Signaling in Neurons	0.0457088	NaN	0.0755	FYN,RHOG,SEMA4D,FNBP1
Regulation of eIF4 and p70S6K Signaling	0.0467735	-1	0.051	FGFR3,PPP2R2A,RPS10,EIF3I,PDPK1,FGFR2,RPS24,RPS14
Role of NFAT in Regulation of the Immune Response	0.0467735	0.377964	0.0486	FGFR3,FYN,PLCB4,NFKBIA,PRKCQ,GNAS,NFAT5,FGFR2,GNG12
G Protein Signaling Mediated by Tubby	0.0467735	NaN	0.0938	PLCB4,GNAS,GNG12
GNRH Signaling	0.0467735	-0.377964	0.0543	PLCB4,PRKCQ,GNAS,PRKCD,CREB3,ADCY6,ADCY8
Cellular Effects of Sildenafil (Viagra)	0.047863	NaN	0.0538	PLCB4,GNAS,CACNA1E,CACNG5,ADCY6,ADCY8,PLCD4
Glycogen Degradation III	0.047863	NaN	0.143	PYGM,PYGB
Circadian Rhythm Signaling	0.0501187	NaN	0.0909	ADCYAP1R1,GRIN2D,CREB3
Hepatic Cholestasis	0.0501187	NaN	0.0503	TRAF6,IL33,NFKBIA,PRKCQ,NGFR,PRKCD,ADCY6,ADCY8
Adenine and Adenosine Salvage I	0.0501187	NaN	0.5	PNP,
Alanine Biosynthesis II	0.0501187	NaN	0.5	GPT2,
Alanine Degradation III	0.0501187	NaN	0.5	GPT2,
Asparagine Degradation I	0.0501187	NaN	0.5	ASPG,
Choline Degradation I	0.0501187	NaN	0.5	CHDH,
Cysteine Biosynthesis/Homocysteine Degradation	0.0501187	NaN	0.5	CBS/CBSL,
Guanine and Guanosine Salvage I	0.0501187	NaN	0.5	PNP,
Putrescine Biosynthesis III	0.0501187	NaN	0.5	ODC1,
Taurine Biosynthesis	0.0501187	NaN	0.5	CSAD,
Colorectal Cancer Metastasis Signaling	0.0512861	-2.52982	0.0445	FGFR3,RHOG,GNAS,MMP15,ADCY6,FGFR2,FZD9,FZD1,ADCY8,GNG12,FNBP1
AMPK Signaling	0.0524807	-1	0.0476	FGFR3,FOXO4,GNAS,ADRA2A,PCK2,PPP2R2A,CREB3,PDPK1,FGFR2
Actin Nucleation by ARP-WASP Complex	0.0537032	0	0.0714	ARPC1A,RHOG,ARPC1B,FNBP1
T Cell Receptor Signaling	0.0588844	NaN	0.055	FGFR3,FYN,NFKBIA,PRKCQ,NFAT5,FGFR2
NRF2-mediated Oxidative Stress Response	0.0588844	NaN	0.0466	FGFR3,PRKCQ,GSTM2,KEAP1,PRKCD,FGFR2,DNAJC1,GSTO1,GSTP1
Aldosterone Signaling in Epithelial Cells	0.0616595	0.377964	0.0482	FGFR3,PLCB4,PRKCQ,PRKCD,PDPK1,FGFR2,DNAJC1,PLCD4
Chondroitin Sulfate Degradation (Metazoa)	0.0616595	NaN	0.125	GALNS,ARSB
γ-glutamyl Cycle	0.0616595	NaN	0.125	OPLAH,GGCT
PEDF Signaling	0.0630957	NaN	0.0595	FGFR3,NFKBIA,WASF2,FGFR2,TCF12
Small Cell Lung Cancer Signaling	0.0630957	NaN	0.0595	TRAF6,FGFR3,PIAS3,NFKBIA,FGFR2
Ephrin A Signaling	0.0660693	NaN	0.0667	FGFR3,FYN,NGFR,FGFR2
Insulin Receptor Signaling	0.0676083	-1.13389	0.0496	FGFR3,FOXO4,FYN,PPP1R14C,PPP1R3C,PDPK1,FGFR2
HIPPO signaling	0.0676083	NaN	0.0581	PPP1R14C,DLG1,PPP2R2A,PPP1R3C,LATS2
LPS-stimulated MAPK Signaling	0.0676083	0.447214	0.0581	FGFR3,NFKBIA,PRKCQ,PRKCD,FGFR2
April Mediated Signaling	0.0707946	NaN	0.0789	TRAF6,NFKBIA,NFAT5
G Beta Gamma Signaling	0.0724436	1.34164	0.0568	PRKCQ,GNAS,PRKCD,PDPK1,GNG12
VEGF Family Ligand-Receptor Interactions	0.0724436	0.447214	0.0568	FGFR3,PLA2G4A,PRKCQ,PRKCD,FGFR2
Inosine-5'-phosphate Biosynthesis II	0.074131	NaN	0.333	PAICS,
Thiosulfate Disproportionation III (Rhodanese)	0.074131	NaN	0.333	TST,
Ephrin Receptor Signaling	0.0758578	0	0.046	FYN,ARPC1A,GNAS,ARPC1B,GRIN2D,CREB3,MAP4K4,GNG12
Apoptosis Signaling	0.0758578	0	0.0562	CAPN5,NFKBIA,PRKCQ,RPS6KA1,MAP4K4
Netrin Signaling	0.0758578	NaN	0.0769	NFAT5,UNC5B,ABLIM3
CNTF Signaling	0.0758578	-1	0.0635	FGFR3,RPS6KA3,FGFR2,RPS6KA1
PCP pathway	0.0758578	NaN	0.0635	CTHRC1,FZD9,SDC3,FZD1
p38 MAPK Signaling	0.0776247	0	0.0513	TRAF6,IL33,PLA2G4A,CREB3,RPS6KA3,RPS6KA1
IL-12 Signaling and Production in Macrophages	0.0794328	NaN	0.0479	TRAF6,FGFR3,APOE,PRKCQ,PRKCD,FGFR2,CLU
B Cell Activating Factor Signaling	0.0812831	NaN	0.075	TRAF6,NFKBIA,NFAT5
Thrombopoietin Signaling	0.0831764	0	0.0615	FGFR3,PRKCQ,PRKCD,FGFR2
PTEN Signaling	0.0831764	0.816497	0.0504	FGFR3,FOXO4,NGFR,PDPK1,FGFR2,PREX2
Renin-Angiotensin Signaling	0.0851138	-0.816497	0.05	FGFR3,PRKCQ,PRKCD,ADCY6,FGFR2,ADCY8
PPARα/RXRα Activation	0.0851138	NaN	0.0449	TRAF6,PLCB4,NFKBIA,GNAS,ADCY6,ADCY8,PLCD4,MAP4K4
Th2 Pathway	0.0870964	0.816497	0.0467	FGFR3,IL33,CCR5,PRKCQ,S1PR1,FGFR2,NOTCH1
LXR/RXR Activation	0.0870964	0	0.0496	IL33,APOE,ABCG4,NGFR,CYP51A1,CLU
PPAR Signaling	0.0870964	-0.447214	0.0538	TRAF6,IL33,NFKBIA,NGFR,MAP4K4
NF-κB Signaling	0.0891251	-0.707107	0.0444	TRAF6,FGFR3,IL33,NFKBIA,PRKCQ,NGFR,FGFR2,MAP4K4
Huntington's Disease Signaling	0.0891251	1.13389	0.0415	FGFR3,CAPN5,PLCB4,PRKCQ,POLR2A,PRKCD,CREB3,PDPK1,FGFR2,GNG12
RhoA Signaling	0.0912011	0.447214	0.0492	ARPC1A,ARPC1B,ANLN,CDC42EP4,CDC42EP2,PLD1
iCOS-iCOSL Signaling in T Helper Cells	0.0912011	0.447214	0.0492	FGFR3,NFKBIA,PRKCQ,NFAT5,PDPK1,FGFR2
Eicosanoid Signaling	0.0912011	-1	0.0597	PLA2G4A,ABHD3,PLA2G7,PAFAH1B3
Role of IL-17A in Arthritis	0.0912011	NaN	0.0597	FGFR3,NFKBIA,FGFR2,RPS6KA1
Gustation Pathway	0.0954993	NaN	0.0484	ENPP6,PDE8A,P2RX4,ADCY6,ADCY8,P2RX7
Serotonin Receptor Signaling	0.0954993	NaN	0.0698	ADCY6,ADCY8,QDPR
ErbB2-ErbB3 Signaling	0.0977237	0	0.058	FGFR3,ETV4,PDPK1,FGFR2
Ascorbate Recycling (Cytosolic)	0.0977237	NaN	0.25	GSTO1,
Phenylalanine Degradation I (Aerobic)	0.0977237	NaN	0.25	QDPR,
Glioma Invasiveness Signaling	0.102094	-2	0.0571	FGFR3,RHOG,FGFR2,FNBP1
ErbB Signaling	0.103992	NaN	0.051	FGFR3,PRKCQ,PRKCD,PDPK1,FGFR2
Melatonin Signaling	0.10617	1	0.0563	PLCB4,PRKCQ,PRKCD,PLCD4
Integrin Signaling	0.10666	-0.707107	0.0411	FGFR3,CAPN5,FYN,ARPC1A,RHOG,ARPC1B,FGFR2,TSPAN2,FNBP1
PI3K Signaling in B Lymphocytes	0.107647	1.63299	0.0469	FYN,PLCB4,NFKBIA,NFAT5,PDPK1,PLCD4
Basal Cell Carcinoma Signaling	0.110154	0	0.0556	FZD9,FZD1,HHIP,GLI1
Role of MAPK Signaling in the Pathogenesis of Influenza	0.110154	NaN	0.0556	PLA2G4A,ABHD3,PLA2G7,PAFAH1B3
STAT3 Pathway	0.114288	-1	0.0548	FGFR3,PIAS3,NGFR,FGFR2
RANK Signaling in Osteoclasts	0.114288	0	0.0495	TRAF6,FGFR3,NFKBIA,MITF,FGFR2
Virus Entry via Endocytic Pathways	0.117761	NaN	0.049	FGFR3,FYN,PRKCQ,PRKCD,FGFR2
Toll-like Receptor Signaling	0.118577	1	0.0541	TRAF6,IL33,NFKBIA,MAP4K4
PKCθ Signaling in T Lymphocytes	0.11995	0.816497	0.0455	FGFR3,FYN,NFKBIA,PRKCQ,NFAT5,FGFR2
Creatine-phosphate Biosynthesis	0.120504	NaN	0.2	MAP4K4,
Serine Biosynthesis	0.120504	NaN	0.2	PSAT1,
Tetrahydrofolate Salvage from 5,10-methenyltetrahydrofolate	0.120504	NaN	0.2	MTHFD2,
Trans, trans-farnesyl Diphosphate Biosynthesis	0.120504	NaN	0.2	IDI1,
Antiproliferative Role of Somatostatin Receptor 2	0.123027	NaN	0.0533	FGFR3,NPR1,FGFR2,GNG12
Role of PI3K/AKT Signaling in the Pathogenesis of Influenza	0.12735	-2	0.0526	FGFR3,CCR5,NFKBIA,FGFR2
Clathrin-mediated Endocytosis Signaling	0.12942	NaN	0.0406	FGFR3,APOE,ARPC1A,ARPC1B,FGF12,FGFR2,CLU,HIP1R
Gluconeogenesis I	0.131522	NaN	0.08	ENO3,ALDOC
Glycolysis I	0.131522	NaN	0.08	ENO3,ALDOC
IL-17A Signaling in Airway Cells	0.131826	-1	0.0519	TRAF6,FGFR3,NFKBIA,FGFR2
Superpathway of Inositol Phosphate Compounds	0.132434	NaN	0.0391	FGFR3,FYN,PLCB4,TNS3,SSH3,FGFR2,NUDT14,EYA4,PLCD4
CD40 Signaling	0.136458	-1	0.0513	TRAF6,FGFR3,NFKBIA,FGFR2
VDR/RXR Activation	0.136458	-2	0.0513	SERPINB1,PRKCQ,PRKCD,KLK6
Role of Osteoblasts, Osteoclasts and Chondrocytes in Rheumatoid Arthritis	0.137404	NaN	0.0388	TRAF6,FGFR3,IL33,NFKBIA,NFAT5,NGFR,FGFR2,FZD9,FZD1
Acute Phase Response Signaling	0.139316	0.447214	0.0414	IL33,TRAF6,ITIH3,NFKBIA,NGFR,PDPK1,SERPIND1
Pentose Phosphate Pathway (Non-oxidative Branch)	0.142889	NaN	0.167	TKT,
Gαs Signaling	0.14388	-2	0.0459	GNAS,CREB3,ADCY6,ADCY8,GNG12
Docosahexaenoic Acid (DHA) Signaling	0.145211	NaN	0.0577	FGFR3,PDPK1,FGFR2
Acetone Degradation I (to Methylglyoxal)	0.149279	NaN	0.0741	FAM213B,CYP51A1
D-myo-inositol (1,4,5)-Trisphosphate Biosynthesis	0.149279	NaN	0.0741	PLCB4,PLCD4
Macropinocytosis Signaling	0.150314	0	0.0494	FGFR3,PRKCQ,PRKCD,FGFR2
FcγRIIB Signaling in B Lymphocytes	0.151008	NaN	0.0566	FGFR3,PDPK1,FGFR2
Androgen Signaling	0.152055	NaN	0.045	PRKCQ,GNAS,POLR2A,PRKCD,GNG12
Telomerase Signaling	0.152055	-0.447214	0.045	FGFR3,PPP2R2A,PDPK1,FGFR2,ELF1
Nitric Oxide Signaling in the Cardiovascular System	0.159956	0.447214	0.0442	FGFR3,PRKCQ,CACNA1E,PRKCD,FGFR2
IL-3 Signaling	0.159956	NaN	0.0482	FGFR3,PRKCQ,PRKCD,FGFR2
Melanoma Signaling	0.163305	NaN	0.0545	FGFR3,MITF,FGFR2
Adenine and Adenosine Salvage III	0.164816	NaN	0.143	PNP,
Superpathway of Serine and Glycine Biosynthesis I	0.164816	NaN	0.143	PSAT1,
Epithelial Adherens Junction Signaling	0.167494	NaN	0.0411	TUBA1B,EPN2,ARPC1A,ARPC1B,KEAP1,NOTCH1
Sertoli Cell-Sertoli Cell Junction Signaling	0.16788	NaN	0.0393	TUBA1B,EPN2,DLG1,CLDN11,JAM3,KEAP1,PLS1
HGF Signaling	0.168267	0	0.0435	FGFR3,PRKCQ,PRKCD,FGFR2,ELF1
Sonic Hedgehog Signaling	0.176198	NaN	0.0667	HHIP,GLI1
Rac Signaling	0.176604	0.447214	0.0427	FGFR3,ARPC1A,ARPC1B,FGFR2,PLD1
HER-2 Signaling in Breast Cancer	0.184927	NaN	0.0455	FGFR3,PRKCQ,PRKCD,FGFR2
Histidine Degradation III	0.18578	NaN	0.125	MTHFD2,
Purine Ribonucleosides Degradation to Ribose-1-phosphate	0.18578	NaN	0.125	PNP,
B Cell Receptor Signaling	0.191426	0.377964	0.0378	FGFR3,NFKBIA,PRKCQ,NFAT5,CREB3,PDPK1,FGFR2
Th1 and Th2 Activation Pathway	0.191426	NaN	0.0378	FGFR3,IL33,CCR5,PRKCQ,S1PR1,FGFR2,NOTCH1
FGF Signaling	0.194984	-2	0.0444	FGFR3,CREB3,FGF12,FGFR2
Induction of Apoptosis by HIV1	0.194984	NaN	0.05	NFKBIA,NGFR,SLC25A10
Natural Killer Cell Signaling	0.198609	NaN	0.041	FGFR3,FYN,PRKCQ,PRKCD,FGFR2
Role of Tissue Factor in Cancer	0.198609	NaN	0.041	FGFR3,FYN,RPS6KA3,FGFR2,RPS6KA1
Regulation of Actin-based Motility by Rho	0.200447	0	0.044	ARPC1A,RHOG,ARPC1B,FNBP1
EIF2 Signaling	0.200909	-1	0.0362	FGFR3,RPL39,RPS10,EIF3I,PDPK1,FGFR2,RPS24,RPS14
MIF-mediated Glucocorticoid Regulation	0.203704	NaN	0.0606	PLA2G4A,NFKBIA
Factors Promoting Cardiogenesis in Vertebrates	0.205589	NaN	0.0435	PRKCQ,PRKCD,FZD9,FZD1
Folate Transformations I	0.206538	NaN	0.111	MTHFD2,
Pathogenesis of Multiple Sclerosis	0.206538	NaN	0.111	CCR5,
Phosphatidylethanolamine Biosynthesis II	0.206538	NaN	0.111	ETNK2,
Sucrose Degradation V (Mammalian)	0.206538	NaN	0.111	ALDOC,
ERK5 Signaling	0.214783	NaN	0.0476	CREB3,RPS6KA3,RPS6KA1
FXR/RXR Activation	0.216272	NaN	0.0397	IL33,APOE,PCK2,CLU,G6PC3
D-myo-inositol-5-phosphate Metabolism	0.217771	NaN	0.0377	PLCB4,TNS3,SSH3,NUDT14,EYA4,PLCD4
Endometrial Cancer Signaling	0.221309	NaN	0.0469	FGFR3,PDPK1,FGFR2
IL-17A Signaling in Fibroblasts	0.222331	NaN	0.0571	TRAF6,NFKBIA
Nucleotide Excision Repair Pathway	0.222331	NaN	0.0571	POLR2A,XPA
Actin Cytoskeleton Signaling	0.223872	1.13389	0.0351	FGFR3,ARPC1A,WASF2,ARPC1B,FGF12,SSH3,FGFR2,GNG12
3-phosphoinositide Biosynthesis	0.223872	NaN	0.0361	FGFR3,FYN,TNS3,SSH3,FGFR2,NUDT14,EYA4
Estrogen Receptor Signaling	0.225944	NaN	0.0391	DDX5,POLR2A,PCK2,CTBP2,G6PC3
Glycine Betaine Degradation	0.226464	NaN	0.1	SARDH,
Ketogenesis	0.226464	NaN	0.1	HMGCS1,
Pentose Phosphate Pathway	0.226464	NaN	0.1	TKT,
Sumoylation Pathway	0.226986	-1	0.0417	NFKBIA,RHOG,CTBP2,FNBP1
ILK Signaling	0.231206	-1.88982	0.0357	FGFR3,RHOG,PPP2R2A,CREB3,PDPK1,FGFR2,FNBP1
TR/RXR Activation	0.237684	NaN	0.0408	FGFR3,COL6A3,FGFR2,THRSP
GABA Receptor Signaling	0.241546	NaN	0.0448	GNAS,ADCY6,ADCY8
CTLA4 Signaling in Cytotoxic T Lymphocytes	0.24322	NaN	0.0404	FGFR3,FYN,PPP2R2A,FGFR2
Purine Nucleotides De Novo Biosynthesis II	0.246037	NaN	0.0909	PAICS,
Remodeling of Epithelial Adherens Junctions	0.248313	NaN	0.0441	TUBA1B,ARPC1A,ARPC1B
HMGB1 Signaling	0.249459	-2.23607	0.0376	FGFR3,RHOG,NGFR,FGFR2,FNBP1
Th1 Pathway	0.258821	-0.447214	0.037	FGFR3,CCR5,PRKCQ,FGFR2,NOTCH1
Wnt/β-catenin Signaling	0.259418	-1	0.0355	GJA1,PPP2R2A,TLE4,SOX8,FZD9,FZD1
tRNA Splicing	0.260016	NaN	0.0513	ENPP6,PDE8A
Role of Pattern Recognition Receptors in Recognition of Bacteria and Viruses	0.268534	0.447214	0.0365	TRAF6,FGFR3,PRKCQ,PRKCD,FGFR2
Role of PKR in Interferon Induction and Antiviral Response	0.269774	NaN	0.05	TRAF6,NFKBIA
MIF Regulation of Innate Immunity	0.279254	NaN	0.0488	PLA2G4A,NFKBIA
Mechanisms of Viral Exit from Host Cells	0.279254	NaN	0.0488	PRKCQ,PRKCD
Stearate Biosynthesis I (Animals)	0.279254	NaN	0.0488	FAM213B,ACSL6
GM-CSF Signaling	0.282488	NaN	0.0411	FGFR3,CSF2RA,FGFR2
IGF-1 Signaling	0.282488	NaN	0.0377	FGFR3,PDPK1,FGFR2,IGFBP2
Mouse Embryonic Stem Cell Pluripotency	0.282488	-1	0.0377	FGFR3,FGFR2,FZD9,FZD1
Choline Biosynthesis III	0.283792	NaN	0.0769	PLD1,
Fatty Acid Activation	0.283792	NaN	0.0769	ACSL6,
Guanosine Nucleotides Degradation III	0.283792	NaN	0.0769	PNP,
Leukocyte Extravasation Signaling	0.285102	NaN	0.0333	FGFR3,CLDN11,PRKCQ,JAM3,PRKCD,MMP15,FGFR2
UVC-Induced MAPK Signaling	0.288403	NaN	0.0476	PRKCQ,PRKCD
Granulocyte Adhesion and Diapedesis	0.293765	NaN	0.0339	IL33,CLDN11,JAM3,NGFR,MMP15,SDC3
Pyrimidine Ribonucleotides Interconversion	0.297852	NaN	0.0465	ENTPD2,CTPS2
Role of Hypercytokinemia/hyperchemokinemia in the Pathogenesis of Influenza	0.297852	NaN	0.0465	IL33,CCR5
Role of RIG1-like Receptors in Antiviral Innate Immunity	0.297852	NaN	0.0465	TRAF6,NFKBIA
Role of p14/p19ARF in Tumor Suppression	0.297852	NaN	0.0465	FGFR3,FGFR2
Calcium Signaling	0.298538	0	0.0337	NFAT5,GRIN2D,CREB3,TNNI1,SLC8A1,TRPC3
DNA Double-Strand Break Repair by Homologous Recombination	0.301995	NaN	0.0714	ATRX,
Urate Biosynthesis/Inosine 5'-phosphate Degradation	0.301995	NaN	0.0714	PNP,
Ovarian Cancer Signaling	0.302691	NaN	0.0347	FGFR3,GJA1,FGFR2,FZD9,FZD1
Glioma Signaling	0.305492	0	0.0364	FGFR3,PRKCQ,PRKCD,FGFR2
iNOS Signaling	0.30761	NaN	0.0455	TRAF6,NFKBIA
Angiopoietin Signaling	0.310456	NaN	0.039	FGFR3,NFKBIA,FGFR2
Estrogen-Dependent Breast Cancer Signaling	0.310456	NaN	0.039	FGFR3,CREB3,FGFR2
Non-Small Cell Lung Cancer Signaling	0.310456	NaN	0.039	FGFR3,PDPK1,FGFR2
IL-9 Signaling	0.316957	NaN	0.0444	FGFR3,FGFR2
Pyrimidine Ribonucleotides De Novo Biosynthesis	0.316957	NaN	0.0444	ENTPD2,CTPS2
Vitamin-C Transport	0.31989	NaN	0.0667	GSTO1,
Regulation of IL-2 Expression in Activated and Anergic T Lymphocytes	0.32434	NaN	0.038	FYN,NFKBIA,NFAT5
Dermatan Sulfate Biosynthesis (Late Stages)	0.335738	NaN	0.0426	CHST3,HS3ST1
Methylglyoxal Degradation III	0.337287	NaN	0.0625	FAM213B,
Regulation of the Epithelial-Mesenchymal Transition Pathway	0.347536	NaN	0.0317	FGFR3,FGF12,FGFR2,FZD9,FZD1,NOTCH1
Pancreatic Adenocarcinoma Signaling	0.35156	0	0.0339	FGFR3,FGFR2,NOTCH1,PLD1
JAK/Stat Signaling	0.352371	NaN	0.0361	FGFR3,PIAS3,FGFR2
RAR Activation	0.352371	NaN	0.0316	PRKCQ,NRIP2,PRKCD,ADCY6,PDPK1,ADCY8
Adenosine Nucleotides Degradation II	0.353997	NaN	0.0588	PNP,
Mitochondrial L-carnitine Shuttle Pathway	0.353997	NaN	0.0588	ACSL6,
Chondroitin Sulfate Biosynthesis (Late Stages)	0.363078	NaN	0.04	CHST3,HS3ST1
IL-17 Signaling	0.366438	NaN	0.0353	TRAF6,FGFR3,FGFR2
Role of NANOG in Mammalian Embryonic Stem Cell Pluripotency	0.374111	NaN	0.0328	FGFR3,FGFR2,FZD9,FZD1
Bladder Cancer Signaling	0.380189	NaN	0.0345	FGFR3,FGF12,MMP15
Cysteine Biosynthesis III (mammalia)	0.386367	NaN	0.0526	CBS/CBSL,
Histamine Degradation	0.386367	NaN	0.0526	ALDH1L1,
Neuregulin Signaling	0.387258	NaN	0.0341	PRKCQ,PRKCD,PDPK1
IL-4 Signaling	0.39355	NaN	0.0337	FGFR3,NFAT5,FGFR2
Granzyme A Signaling	0.401791	NaN	0.05	HIST1H1C,
Purine Nucleotides Degradation II (Aerobic)	0.401791	NaN	0.05	PNP,
Acute Myeloid Leukemia Signaling	0.40738	NaN	0.033	FGFR3,CSF2RA,FGFR2
Death Receptor Signaling	0.414	NaN	0.0326	PARP16,NFKBIA,MAP4K4
Inflammasome pathway	0.416869	NaN	0.0476	P2RX7,
Maturity Onset Diabetes of Young (MODY) Signaling	0.416869	NaN	0.0476	CACNA1E,
Oxidative Ethanol Degradation III	0.416869	NaN	0.0476	ALDH1L1,
Gα12/13 Signaling	0.420727	NaN	0.0308	FGFR3,NFKBIA,FGFR2,CDH19
Fatty Acid α-oxidation	0.432514	NaN	0.0455	ALDH1L1,
Polyamine Regulation in Colon Cancer	0.432514	NaN	0.0455	ODC1,
Chondroitin Sulfate Biosynthesis	0.443609	NaN	0.0339	CHST3,HS3ST1
MSP-RON Signaling Pathway	0.443609	NaN	0.0339	FGFR3,FGFR2
Putrescine Degradation III	0.446684	NaN	0.0435	ALDH1L1,
Dermatan Sulfate Biosynthesis	0.460257	NaN	0.0328	CHST3,HS3ST1
CDP-diacylglycerol Biosynthesis I	0.460257	NaN	0.0417	GPAM,
Activation of IRF by Cytosolic Pattern Recognition Receptors	0.468813	NaN	0.0323	TRAF6,NFKBIA
Protein Ubiquitination Pathway	0.469894	NaN	0.0275	TRAF6,USP3,PSMB10,ANAPC5,DNAJC1,NEDD4L,TAP2
PAK Signaling	0.474242	NaN	0.0297	FGFR3,FGFR2,DSCAM
Bupropion Degradation	0.474242	NaN	0.04	CYP51A1,
Ethanol Degradation IV	0.474242	NaN	0.04	ALDH1L1,
Tryptophan Degradation X (Mammalian, via Tryptamine)	0.474242	NaN	0.04	ALDH1L1,
Aryl Hydrocarbon Receptor Signaling	0.476431	NaN	0.0286	ALDH1L1,GSTM2,GSTO1,GSTP1
D-myo-inositol (1,4,5,6)-Tetrakisphosphate Biosynthesis	0.481948	NaN	0.0284	TNS3,SSH3,NUDT14,EYA4
D-myo-inositol (3,4,5,6)-tetrakisphosphate Biosynthesis	0.481948	NaN	0.0284	TNS3,SSH3,NUDT14,EYA4
IL-2 Signaling	0.485289	NaN	0.0312	FGFR3,FGFR2
Antiproliferative Role of TOB in T Cell Signaling	0.487528	NaN	0.0385	RPS6KA1,
Phosphatidylglycerol Biosynthesis II (Non-plastidic)	0.487528	NaN	0.0385	GPAM,
Chronic Myeloid Leukemia Signaling	0.493174	NaN	0.0288	FGFR3,CTBP2,FGFR2
SAPK/JNK Signaling	0.493174	NaN	0.0288	FGFR3,FGFR2,MAP4K4
Hypoxia Signaling in the Cardiovascular System	0.494311	NaN	0.0308	NFKBIA,CREB3
PXR/RXR Activation	0.494311	NaN	0.0308	GSTM2,PCK2
Pyridoxal 5'-phosphate Salvage Pathway	0.494311	NaN	0.0308	PRKCQ,PRKCD
Calcium-induced T Lymphocyte Apoptosis	0.502343	NaN	0.0303	PRKCQ,PRKCD
Mitotic Roles of Polo-Like Kinase	0.502343	NaN	0.0303	PPP2R2A,ANAPC5
Systemic Lupus Erythematosus Signaling	0.508159	NaN	0.0267	FGFR3,IL33,NFAT5,SNRNP25,ZMAT5,FGFR2
EGF Signaling	0.517607	NaN	0.0294	FGFR3,FGFR2
Agranulocyte Adhesion and Diapedesis	0.524807	NaN	0.0265	IL33,CLDN11,PODXL2,JAM3,MMP15
Intrinsic Prothrombin Activation Pathway	0.526017	NaN	0.0345	COL2A1,
TNFR2 Signaling	0.526017	NaN	0.0345	NFKBIA,
Type I Diabetes Mellitus Signaling	0.530884	NaN	0.0273	TRAF6,NFKBIA,NGFR
Myc Mediated Apoptosis Signaling	0.533335	NaN	0.0286	FGFR3,FGFR2
Chemokine Signaling	0.540754	NaN	0.0282	CCR5,PLCB4
Role of JAK1 and JAK3 in γc Cytokine Signaling	0.540754	NaN	0.0282	FGFR3,FGFR2
4-1BB Signaling in T Lymphocytes	0.549541	NaN	0.0323	NFKBIA,
3-phosphoinositide Degradation	0.555904	NaN	0.0258	TNS3,SSH3,NUDT14,EYA4
Ephrin B Signaling	0.555904	NaN	0.0274	GNAS,GNG12
Heparan Sulfate Biosynthesis (Late Stages)	0.555904	NaN	0.0274	CHST3,HS3ST1
HIF1α Signaling	0.561048	NaN	0.0261	FGFR3,MMP15,FGFR2
Fatty Acid β-oxidation I	0.561048	NaN	0.0312	ACSL6,
Superpathway of Methionine Degradation	0.561048	NaN	0.0312	CBS/CBSL,
GDNF Family Ligand-Receptor Interactions	0.578096	NaN	0.0263	FGFR3,FGFR2
IL-15 Signaling	0.578096	NaN	0.0263	FGFR3,FGFR2
Role of Wnt/GSK-3β Signaling in the Pathogenesis of Influenza	0.578096	NaN	0.0263	FZD9,FZD1
Inhibition of Angiogenesis by TSP1	0.583445	NaN	0.0294	FYN,
Oncostatin M Signaling	0.583445	NaN	0.0294	CHI3L1,
TWEAK Signaling	0.583445	NaN	0.0294	NFKBIA,
Cell Cycle Regulation by BTG Family Proteins	0.592925	NaN	0.0286	PPP2R2A,
Coagulation System	0.592925	NaN	0.0286	SERPIND1,
Dopamine Degradation	0.592925	NaN	0.0286	ALDH1L1,
Ethanol Degradation II	0.613762	NaN	0.027	ALDH1L1,
Antigen Presentation Pathway	0.623735	NaN	0.0263	TAP2,
Cell Cycle Control of Chromosomal Replication	0.623735	NaN	0.0263	PRIM1,
Notch Signaling	0.623735	NaN	0.0263	NOTCH1,
Estrogen Biosynthesis	0.63387	NaN	0.0256	CYP51A1,
Inhibition of Matrix Metalloproteases	0.63387	NaN	0.0256	MMP15,
tRNA Charging	0.63387	NaN	0.0256	LARS2,
ATM Signaling	1	NaN	0.025	NFKBIA,CREB3
Agrin Interactions at Neuromuscular Junction	1	NaN	0.0145	LAMA2,
Altered T Cell and B Cell Signaling in Rheumatoid Arthritis	1	NaN	0.0111	IL33,
Amyloid Processing	1	NaN	0.0196	CAPN5,
Assembly of RNA Polymerase II Complex	1	NaN	0.02	POLR2A,
BMP signaling pathway	1	NaN	0.0132	ZNF423,
CD27 Signaling in Lymphocytes	1	NaN	0.0192	NFKBIA,
Cancer Drug Resistance By Drug Efflux	1	NaN	0.0204	FOXO4,
Caveolar-mediated Endocytosis Signaling	1	NaN	0.0141	FYN,
Cdc42 Signaling	1	NaN	0.018	ARPC1A,ARPC1B,CDC42EP2
Cell Cycle: G2/M DNA Damage Checkpoint Regulation	1	NaN	0.0204	RPS6KA1,
Communication between Innate and Adaptive Immune Cells	1	NaN	0.0112	IL33,
Cyclins and Cell Cycle Regulation	1	NaN	0.0128	PPP2R2A,
Glucocorticoid Receptor Signaling	1	NaN	0.0244	TRAF6,FGFR3,NFKBIA,POLR2A,NFAT5,PCK2,FGFR2
Graft-versus-Host Disease Signaling	1	NaN	0.0208	IL33,
Heparan Sulfate Biosynthesis	1	NaN	0.0247	CHST3,HS3ST1
Hereditary Breast Cancer Signaling	1	NaN	0.0211	FGFR3,POLR2A,FGFR2
Melatonin Degradation I	1	NaN	0.0161	CYP51A1,
Nicotine Degradation II	1	NaN	0.0159	CYP51A1,
Nicotine Degradation III	1	NaN	0.0185	CYP51A1,
Noradrenaline and Adrenaline Degradation	1	NaN	0.025	ALDH1L1,
OX40 Signaling Pathway	1	NaN	0.0112	NFKBIA,
PDGF Signaling	1	NaN	0.0222	FGFR3,FGFR2
PI3K/AKT Signaling	1	NaN	0.0242	NFKBIA,PPP2R2A,PDPK1
Paxillin Signaling	1	NaN	0.0177	FGFR3,FGFR2
Phagosome Maturation	1	NaN	0.0139	TUBA1B,CTSC
Primary Immunodeficiency Signaling	1	NaN	0.0208	TAP2,
Regulation of Cellular Mechanics by Calpain Protease	1	NaN	0.0175	CAPN5,
Renal Cell Carcinoma Signaling	1	NaN	0.0247	FGFR3,FGFR2
Retinoic acid Mediated Apoptosis Signaling	1	NaN	0.0164	PARP16,
Role of CHK Proteins in Cell Cycle Checkpoint Control	1	NaN	0.0182	PPP2R2A,
Role of Cytokines in Mediating Communication between Immune Cells	1	NaN	0.0185	IL33,
Role of Oct4 in Mammalian Embryonic Stem Cell Pluripotency	1	NaN	0.0217	JARID2,
Salvage Pathways of Pyrimidine Ribonucleotides	1	NaN	0.0211	PRKCQ,PRKCD
Serotonin Degradation	1	NaN	0.0135	ALDH1L1,
Superpathway of Melatonin Degradation	1	NaN	0.0149	CYP51A1,
T Helper Cell Differentiation	1	NaN	0.0137	NGFR,
TGF-β Signaling	1	NaN	0.023	TRAF6,ZNF423
TNFR1 Signaling	1	NaN	0.0204	NFKBIA,
Tight Junction Signaling	1	NaN	0.024	CLDN11,PPP2R2A,JAM3,NGFR
Triacylglycerol Biosynthesis	1	NaN	0.0217	GPAM,
Unfolded protein response	1	NaN	0.0185	CD82,
VEGF Signaling	1	NaN	0.0194	FGFR3,FGFR2
autophagy	1	NaN	0.0167	CTSC,
p53 Signaling	1	NaN	0.018	FGFR3,FGFR2

## Sheet: striatum
Ingenuity pathway analysis striatum (933 genes)
Ingenuity Canonical Pathways	p-value	zScore	Ratio	Molecules
Breast Cancer Regulation by Stathmin1	6.91831e-08	NaN	0.133	FGFR2,ADCY6,PPP1R7,LIMK1,CAMK2D,IRS1,GAB1,TUBB2A,PPP1R3C,CCNE1,ADCY2,ADCY8,FGFR3,LIMK2,PPP1R12A,PLCB4,CAMK4,PPP2R2A,TUBB4B,PPP1R14C,PRKCD,GNAS,CAMK1,TUBA1B,GNG2,ARHGEF9,PRKACA
Axonal Guidance Signaling	2.18776e-07	NaN	0.0958	FGFR2,SEMA4G,PLCD4,SEMA3E,ITGA3,GLI1,LIMK1,SMO,EPHA3,SLIT3,SEMA6D,IRS1,NTNG1,GAB1,RND1,TUBB2A,FZD1,UNC5B,SEMA5A,ARPC1A,GLIS2,FGFR3,PLXNA3,ROBO2,LIMK2,PLCB4,MYL6B,EPHB2,ABLIM2,SEMA3D,TUBB4B,FZD9,ARPC2,PLXND1,PLXNA1,ABLIM3,PRKCD,GNAS,NGFR,NRP1,TUBA1B,GNG2,PRKACA
G-Protein Coupled Receptor Signaling	2.51189e-06	NaN	0.107	FGFR2,ADCY6,S1PR3,CAMK2D,IRS1,GAB1,RGS16,RAPGEF3,HTR7,ADCY2,CREBBP,ADCY8,HTR2A,S1PR1,FGFR3,ADRA1B,PLCB4,CAMK4,PTH1R,PDE8A,GNAS,ATF4,PDPK1,NAPEPLD,PDE8B,ENPP6,RPS6KA1,ADRA2A,PRKACA
Thrombin Signaling	3.0903e-06	-2.29366	0.118	FGFR3,FGFR2,PLCD4,ADCY6,PPP1R12A,PLCB4,MAPK12,CAMK2D,IRS1,CAMK4,MYL6B,GAB1,RHOG,PRKCD,GNAS,PDPK1,CAMK1,ADCY2,GNG2,ARHGEF9,RHOV,RHOF,ADCY8,FNBP1
Protein Kinase A Signaling	5.49541e-06	-1.91485	0.0918	PYGM,YWHAQ,PLCD4,ADCY6,DUSP15,PPP1R7,SMO,CAMK2D,SMAD4,AKAP12,PYGB,PPP1R3C,ADCY2,CREBBP,ADCY8,AKAP5,PPP1R12A,PLCB4,CAMK4,PTPN3,MYL6B,MYH10,PPP1R14C,PDE8A,PRKCD,GNAS,ATF4,NAPEPLD,NGFR,PDE8B,ENPP6,PTPRG,GNG2,PHKG1,PRKACA,H1F0
Cardiac β-adrenergic Signaling	1.23027e-05	-1.60357	0.131	ADCY6,PPP1R12A,PPP1R7,SLC8A1,PPP2R2A,PPP1R14C,PDE8A,AKAP12,GNAS,NAPEPLD,PPP1R3C,PDE8B,ENPP6,ADCY2,GNG2,PRKACA,ADCY8,AKAP5
CREB Signaling in Neurons	2.18776e-05	-3.44124	0.114	FGFR3,FGFR2,PLCD4,POLR2A,ADCY6,PLCB4,CAMK2D,IRS1,CAMK4,GAB1,PRKCD,GRIK1,GNAS,ATF4,GRIN2D,RPS6KA1,ADCY2,CREBBP,GNG2,PRKACA,ADCY8
Synaptic Long Term Potentiation	3.01995e-05	-2.32379	0.133	PLCD4,PPP1R12A,PLCB4,PPP1R7,CAMK2D,CAMK4,RAPGEF3,PPP1R14C,PRKCD,ATF4,PPP1R3C,GRIN2D,RPS6KA1,CREBBP,PRKACA,ADCY8
Melanocyte Development and Pigmentation Signaling	3.0903e-05	-2.13809	0.147	FGFR3,FGFR2,ADCY6,RPS6KA3,IRS1,MITF,GAB1,GNAS,ATF4,RPS6KA1,ADCY2,CREBBP,PRKACA,ADCY8
Dopamine-DARPP32 Feedback in cAMP Signaling	3.63078e-05	-1.14708	0.117	PLCD4,ADCY6,PPP1R12A,PLCB4,PPP1R7,CAMK4,PPP2R2A,PPP1R14C,PRKCD,GNAS,ATF4,PPP1R3C,GRIN2D,ADCY2,CREBBP,KCNJ10,PRKACA,KCNJ16,ADCY8
Role of NFAT in Cardiac Hypertrophy	4.0738e-05	NaN	0.109	FGFR3,FGFR2,PLCD4,ADCY6,PLCB4,MAPK12,SLC8A1,CAMK2D,IRS1,CAMK4,GAB1,PRKCD,GNAS,CAMK1,ADCY2,GNG2,HDAC11,PRKACA,HDAC9,ADCY8,AKAP5
Production of Nitric Oxide and Reactive Oxygen Species in Macrophages	4.46684e-05	-2.83683	0.109	FGFR3,FGFR2,JAK2,TNFRSF1B,PPP1R12A,MAPK12,PPP1R7,IRS1,GAB1,PPP2R2A,PPP1R14C,RHOG,PRKCD,NGFR,PPP1R3C,CLU,CREBBP,APOE,RHOV,RHOF,FNBP1
cAMP-mediated signaling	4.57088e-05	-2.83683	0.103	ADCY6,S1PR3,CAMK2D,CAMK4,RAPGEF3,PTH1R,PDE8A,AKAP12,GNAS,ATF4,NAPEPLD,HTR7,PDE8B,ENPP6,CAMK1,RPS6KA1,ADCY2,CREBBP,ADRA2A,PRKACA,ADCY8,AKAP5,S1PR1
α-Adrenergic Signaling	5.01187e-05	-2.3094	0.149	PYGM,ADCY6,SLC8A1,CAMK4,PRKCD,PYGB,GNAS,ADCY2,GNG2,PHKG1,ADRA2A,PRKACA,ADCY8
Phospholipase C Signaling	5.12861e-05	-2.06474	0.1	PLCD4,ADCY6,ITGA3,PPP1R12A,PLCB4,RPS6KA3,CAMK4,MYL6B,RAPGEF3,RHOG,PRKCD,GNAS,ATF4,NAPEPLD,ADCY2,CREBBP,GNG2,HDAC11,ARHGEF9,RHOV,HDAC9,RHOF,ADCY8,FNBP1
Glutamate Receptor Signaling	9.33254e-05	NaN	0.175	GLUL,GRIK1,SLC17A6,HOMER2,GRIN2D,CAMK4,SLC1A4,GNG2,SLC1A6,SLC38A1
Cardiac Hypertrophy Signaling	0.000102329	-4.26401	0.0979	FGFR3,FGFR2,ADRA1B,PLCD4,ADCY6,PLCB4,MAPK12,IRS1,CAMK4,MYL6B,GAB1,RHOG,GNAS,RPS6KA1,ADCY2,CREBBP,GNG2,ADRA2A,PRKACA,RHOV,RHOF,ADCY8,FNBP1
Sphingosine-1-phosphate Signaling	0.000151356	-2.32379	0.122	FGFR3,FGFR2,PLCD4,ADCY6,PLCB4,S1PR3,IRS1,GAB1,RHOG,ADCY2,RHOV,RHOF,ADCY8,FNBP1,S1PR1
CDK5 Signaling	0.000194984	-1.1547	0.131	ADCY6,ITGA3,PPP1R12A,MAPK12,PPP1R7,PPP2R2A,PPP1R14C,GNAS,NGFR,PPP1R3C,ADCY2,PRKACA,ADCY8
Germ Cell-Sertoli Cell Junction Signaling	0.000263027	NaN	0.104	FGFR3,FGFR2,EPN3,LIMK2,ITGA3,MAPK12,LIMK1,IRS1,ACTN1,GAB1,TUBB4B,RHOG,TUBB2A,PDPK1,TUBA1B,RHOV,RHOF,FNBP1
Semaphorin Signaling in Neurons	0.000269153	NaN	0.17	RHOG,PLXNA1,LIMK2,NRP1,LIMK1,RHOV,RHOF,RND1,FNBP1
Gαq Signaling	0.000301995	-2.66789	0.106	FGFR3,FGFR2,ADRA1B,PLCB4,IRS1,CAMK4,GAB1,RGS16,RHOG,PRKCD,GNAS,NAPEPLD,GNG2,RHOV,RHOF,HTR2A,FNBP1
NGF Signaling	0.000301995	-1.60357	0.12	FGFR3,FGFR2,MAPK12,RPS6KA3,IRS1,GAB1,RHOG,PRKCD,ATF4,PDPK1,NGFR,RPS6KA1,CREBBP,TRAF6
Calcium Signaling	0.000380189	-2.11058	0.101	TRPC4,SLC8A1,CAMK2D,CAMK4,TRPC3,MYL6B,MYH10,TRPC1,GRIK1,ATF4,CAMK1,GRIN2D,CHRNB2,CREBBP,HDAC11,PRKACA,HDAC9,AKAP5
CXCR4 Signaling	0.000436516	-2.66789	0.103	FGFR3,FGFR2,ADCY6,PLCB4,MAPK12,IRS1,MYL6B,GAB1,RHOG,PRKCD,GNAS,ADCY2,GNG2,RHOV,RHOF,ADCY8,FNBP1
mTOR Signaling	0.000537032	-2.18282	0.0955	FGFR3,FGFR2,EIF3G,RPS6KA3,INSR,IRS1,GAB1,EIF3I,PPP2R2A,MAPKAP1,RHOG,PRKCD,PDPK1,NAPEPLD,RPS6KA1,RHOV,RHOF,PRKAB2,FNBP1
Colorectal Cancer Metastasis Signaling	0.000537032	-4.02492	0.0891	FGFR3,FGFR2,JAK2,ADCY6,MAPK12,SMO,IRS1,SMAD4,GAB1,FZD9,RHOG,GNAS,FZD1,LRP6,ADCY2,GNG2,PRKACA,RHOV,MMP15,RHOF,ADCY8,FNBP1
Signaling by Rho Family GTPases	0.000537032	-3.27327	0.0891	FGFR3,FGFR2,LIMK2,CDC42EP4,ITGA3,PPP1R12A,MAPK12,LIMK1,IRS1,MYL6B,GAB1,ARPC2,RHOG,GNAS,CDC42EP2,GNG2,ARHGEF9,RHOV,RHOF,PIP5K1B,FNBP1,ARPC1A
Corticotropin Releasing Hormone Signaling	0.00060256	-2.49615	0.117	NPR1,ADCY6,MAPK12,GLI1,SMO,CAMK4,PRKCD,GNAS,ATF4,ADCY2,CREBBP,PRKACA,ADCY8
Gap Junction Signaling	0.000616595	NaN	0.1	FGFR3,FGFR2,PLCD4,NPR1,ADCY6,PLCB4,IRS1,GAB1,TUBB4B,TUBB2A,PRKCD,GNAS,TUBA1B,ADCY2,PRKACA,ADCY8,HTR2A
FLT3 Signaling in Hematopoietic Progenitor Cells	0.000676083	-1.50756	0.129	FGFR3,FGFR2,ATF4,PDPK1,FLT3,MAPK12,RPS6KA3,RPS6KA1,IRS1,CREBBP,GAB1
Leptin Signaling in Obesity	0.000676083	-1.34164	0.129	FGFR3,FGFR2,PLCD4,JAK2,ADCY6,PLCB4,IRS1,ADCY2,PRKACA,GAB1,ADCY8
RhoGDI Signaling	0.000758578	2.5	0.0983	LIMK2,ITGA3,PPP1R12A,LIMK1,MYL6B,ARPC2,RHOG,GNAS,DLC1,CREBBP,GNG2,ARHGEF9,RHOV,RHOF,PIP5K1B,FNBP1,ARPC1A
Molecular Mechanisms of Cancer	0.000776247	NaN	0.0775	FGFR2,ADCY6,ITGA3,GLI1,SMO,CAMK2D,IRS1,SMAD4,GAB1,RAPGEF3,FZD1,CCNE1,LRP6,ADCY2,CREBBP,ADCY8,FNBP1,FGFR3,JAK2,PLCB4,MAPK12,FZD9,RHOG,PRKCD,GNAS,ARHGEF9,PRKACA,RHOV,RHOF
AMPK Signaling	0.000776247	-0.942809	0.0952	FGFR3,PCK2,FGFR2,TBC1D1,ADRA1B,MAPK12,INSR,IRS1,FOXO4,GAB1,PPP2R2A,GNAS,ATF4,PDPK1,CREBBP,ADRA2A,PRKACA,PRKAB2
HIPPO signaling	0.000812831	-1	0.126	PPP1R14C,YWHAQ,DLG1,PPP1R3C,LATS2,PPP1R12A,PPP1R7,YAP1,SMAD4,PPP2R2A,DLG2
14-3-3-mediated Signaling	0.000870964	-2.7136	0.108	FGFR3,FGFR2,YWHAQ,PLCD4,PLCB4,MAPK12,IRS1,YAP1,GAB1,TUBB4B,TUBB2A,PRKCD,RPS6KA1,TUBA1B
P2Y Purigenic Receptor Signaling Pathway	0.00102329	-3.20713	0.106	FGFR3,FGFR2,PLCD4,ADCY6,PLCB4,IRS1,GAB1,PRKCD,ATF4,ADCY2,CREBBP,GNG2,PRKACA,ADCY8
Neurotrophin/TRK Signaling	0.00102329	-1.66667	0.132	FGFR3,FGFR2,ATF4,PDPK1,NGFR,RPS6KA1,IRS1,CREBBP,SORCS1,GAB1
Dopamine Receptor Signaling	0.00112202	-1.41421	0.13	PPP1R14C,PPP1R3C,ADCY6,PPP1R12A,PPP1R7,ADCY2,PRKACA,ADCY8,PPP2R2A,QDPR
ILK Signaling	0.0011749	-2.18282	0.0918	FGFR3,FGFR2,PPP1R12A,MAPK12,IRS1,MYL6B,MYH10,PARVA,ACTN1,GAB1,PPP2R2A,RHOG,ATF4,PDPK1,CREBBP,RHOV,RHOF,FNBP1
Glutathione-mediated Detoxification	0.0011749	NaN	0.2	GSTO1,GSTM2,GSTP1,Gstt3,Gstt1,MGST3
Regulation of Actin-based Motility by Rho	0.00120226	-2.11058	0.121	ARPC2,RHOG,ITGA3,PPP1R12A,LIMK1,MYL6B,RHOV,RHOF,PIP5K1B,FNBP1,ARPC1A
Relaxin Signaling	0.00144544	-3.31662	0.0987	FGFR3,FGFR2,NPR1,ADCY6,IRS1,GAB1,PDE8A,GNAS,NAPEPLD,ENPP6,PDE8B,ADCY2,GNG2,PRKACA,ADCY8
Oleate Biosynthesis II (Animals)	0.00147911	NaN	0.308	Scd2,UFSP1,FADS1,FADS2
Actin Nucleation by ARP-WASP Complex	0.00186209	-1.41421	0.143	ARPC2,RHOG,ITGA3,PPP1R12A,RHOV,RHOF,FNBP1,ARPC1A
Insulin Receptor Signaling	0.00190546	-0.534522	0.0993	FGFR3,FGFR2,JAK2,PPP1R12A,PPP1R7,INSR,IRS1,FOXO4,GAB1,PPP1R14C,PDPK1,PPP1R3C,ASIC2,PRKACA
Type II Diabetes Mellitus Signaling	0.0020893	-1.89737	0.102	FGFR3,FGFR2,TNFRSF1B,MAPK12,INSR,IRS1,GAB1,ACSL6,PRKCD,PDPK1,NGFR,ACSBG1,PRKAB2
Glioblastoma Multiforme Signaling	0.00223872	-3.74166	0.0943	FGFR3,FGFR2,PLCD4,PLCB4,SMO,IRS1,GAB1,FZD9,RHOG,PRKCD,FZD1,CCNE1,RHOV,RHOF,FNBP1
Neuropathic Pain Signaling In Dorsal Horn Neurons	0.00245471	-2.88675	0.105	FGFR3,FGFR2,PRKCD,PLCD4,PLCB4,CAMK1,GRIN2D,CAMK2D,IRS1,CAMK4,PRKACA,GAB1
CCR3 Signaling in Eosinophils	0.0025704	NaN	0.1	FGFR3,FGFR2,LIMK2,PPP1R12A,PLCB4,MAPK12,LIMK1,IRS1,CAMK4,GAB1,PRKCD,GNAS,GNG2
PAK Signaling	0.00275423	-3.31662	0.109	FGFR3,FGFR2,DSCAM,LIMK2,ITGA3,MAPK12,LIMK1,EPHA3,IRS1,MYL6B,GAB1
UVA-Induced MAPK Signaling	0.00301995	-2.7136	0.108	FGFR3,FGFR2,TIPARP,PARP16,PLCD4,PLCB4,MAPK12,RPS6KA3,RPS6KA1,IRS1,GAB1
ERK/MAPK Signaling	0.00338844	-2.5	0.0854	FGFR3,FGFR2,YWHAQ,ITGA3,PPP1R12A,PPP1R7,IRS1,GAB1,PPP2R2A,RAPGEF3,PPP1R14C,PRKCD,ATF4,PPP1R3C,RPS6KA1,CREBBP,PRKACA
Mouse Embryonic Stem Cell Pluripotency	0.0040738	-2.11058	0.104	FGFR3,FGFR2,JAK2,FZD1,MAPK12,SMO,IRS1,CREBBP,SMAD4,GAB1,FZD9
Reelin Signaling in Neurons	0.0042658	NaN	0.109	FGFR3,FGFR2,ITGA3,MAPK12,IRS1,APOE,ARHGEF9,GAB1,PAFAH1B3,LRP8
γ-linolenate Biosynthesis II (Animals)	0.0042658	NaN	0.235	ACSBG1,FADS1,FADS2,ACSL6
Phagosome Formation	0.0042658	NaN	0.0984	FGFR3,RHOG,FGFR2,PRKCD,PLCD4,ITGA3,PLCB4,IRS1,GAB1,RHOV,RHOF,FNBP1
RhoA Signaling	0.0042658	-1.50756	0.0984	ARPC2,PLXNA1,LIMK2,CDC42EP4,DLC1,PPP1R12A,LIMK1,RHPN1,MYL6B,CDC42EP2,PIP5K1B,ARPC1A
Role of Tissue Factor in Cancer	0.0042658	NaN	0.0984	FGFR3,FGFR2,LIMK2,JAK2,ITGA3,MAPK12,RPS6KA3,CSF1,LIMK1,RPS6KA1,IRS1,GAB1
Tec Kinase Signaling	0.0042658	-3.20713	0.0882	FGFR3,FGFR2,JAK2,ITGA3,MAPK12,TNFRSF21,IRS1,GAB1,RHOG,PRKCD,GNAS,GNG2,RHOV,RHOF,FNBP1
Endothelin-1 Signaling	0.00436516	-2.5	0.0856	FGFR3,FGFR2,PLCD4,ADCY6,PLCB4,MAPK12,IRS1,PLA2G7,GAB1,PRKCD,GNAS,NAPEPLD,ADCY2,ABHD3,PAFAH1B3,ADCY8
Ceramide Signaling	0.00467735	0	0.108	FGFR3,FGFR2,NGFR,TNFRSF1B,CERK,S1PR3,IRS1,GAB1,PPP2R2A,S1PR1
Dendritic Cell Maturation	0.00501187	-2.5	0.0842	FGFR3,FGFR2,PLCD4,JAK2,TNFRSF1B,PLCB4,MAPK12,IRS1,GAB1,CD83,ATF4,NGFR,CREBBP,IL33,DDR2,TRAF6
Gαs Signaling	0.00501187	-2.7136	0.101	PTH1R,GNAS,ATF4,HTR7,ADCY6,ADCY2,CREBBP,GNG2,PRKACA,ADCY8,RAPGEF3
Growth Hormone Signaling	0.0057544	-1	0.111	FGFR3,FGFR2,PRKCD,PDPK1,JAK2,RPS6KA3,RPS6KA1,IRS1,GAB1
Human Embryonic Stem Cell Pluripotency	0.00588844	NaN	0.0909	FGFR3,FGFR2,ZIC3,S1PR3,SMO,IRS1,SMAD4,GAB1,FZD9,GNAS,PDPK1,FZD1,S1PR1
Actin Cytoskeleton Signaling	0.0060256	-1	0.0789	FGFR3,FGFR2,FGF12,LIMK2,ITGA3,PPP1R12A,LIMK1,IRS1,MYL6B,MYH10,ACTN1,GAB1,ARPC2,SSH1,SSH3,PIP5K1B,FGF9,ARPC1A
IL-8 Signaling	0.00707946	-3.5	0.0812	FGFR3,FGFR2,LIMK2,MAPK12,LIMK1,IRS1,GAB1,RHOG,PRKCD,GNAS,NAPEPLD,GNG2,RHOV,RHOF,FNBP1,TRAF6
Cellular Effects of Sildenafil (Viagra)	0.00707946	NaN	0.0923	PLCD4,GNAS,CACNG5,ADCY6,PPP1R12A,PLCB4,ADCY2,CAMK4,MYL6B,MYH10,PRKACA,ADCY8
Serotonin Receptor Signaling	0.00758578	NaN	0.14	HTR7,ADCY6,ADCY2,ADCY8,QDPR,HTR2A
Glioma Invasiveness Signaling	0.00758578	-2.82843	0.114	FGFR3,RHOG,FGFR2,IRS1,GAB1,RHOV,RHOF,FNBP1
GPCR-Mediated Nutrient Sensing in Enteroendocrine Cells	0.00776247	NaN	0.106	PRKCD,PLCD4,GNAS,ADCY6,PLCB4,ADCY2,GNG2,PRKACA,ADCY8
Wnt/Ca+ pathway	0.00831764	-1.88982	0.123	PLCD4,ATF4,FZD1,PLCB4,SMO,CREBBP,FZD9
Chemokine Signaling	0.00831764	-2.12132	0.113	LIMK2,PPP1R12A,PLCB4,MAPK12,CAMK1,LIMK1,CAMK2D,CAMK4
Rac Signaling	0.00851138	-1.89737	0.094	ARPC2,FGFR3,FGFR2,LIMK2,ITGA3,ANK1,LIMK1,IRS1,GAB1,PIP5K1B,ARPC1A
G Protein Signaling Mediated by Tubby	0.00912011	NaN	0.156	GNAS,JAK2,PLCB4,INSR,GNG2
Arsenate Detoxification I (Glutaredoxin)	0.00954993	NaN	0.5	GSTO1,PNP
Antioxidant Action of Vitamin C	0.00954993	2.12132	0.0971	GSTO1,PLCD4,NAPEPLD,JAK2,PLCB4,MAPK12,ABHD3,PLA2G7,PAFAH1B3,TXNRD3
Renin-Angiotensin Signaling	0.0102329	-2.7136	0.0917	FGFR3,FGFR2,PRKCD,JAK2,ADCY6,MAPK12,IRS1,ADCY2,PRKACA,GAB1,ADCY8
fMLP Signaling in Neutrophils	0.0107152	-1.50756	0.0909	ARPC2,FGFR3,FGFR2,PRKCD,GNAS,PLCB4,IRS1,CAMK4,GNG2,GAB1,ARPC1A
Ephrin A Signaling	0.0109648	NaN	0.117	FGFR3,FGFR2,NGFR,LIMK1,EPHA3,IRS1,GAB1
FGF Signaling	0.0112202	-2.33333	0.1	FGFR3,FGFR2,FGF12,ATF4,MAPK12,IRS1,CREBBP,GAB1,FGF9
eNOS Signaling	0.0112202	-2.3094	0.0839	FGFR3,FGFR2,ADCY6,IRS1,CAMK4,GAB1,PRKCD,GNAS,PDPK1,ADCY2,PRKACA,ADCY8,PRKAB2
nNOS Signaling in Neurons	0.011749	NaN	0.128	PRKCD,RASD1,CAPN5,GRIN2D,CAMK4,DLG2
Ephrin Receptor Signaling	0.0123027	-0.904534	0.0805	SH2D3C,LIMK2,JAK2,ITGA3,LIMK1,EPHA3,EPHB2,ARPC2,GNAS,ATF4,GRIN2D,CREBBP,GNG2,ARPC1A
Phospholipases	0.0128825	NaN	0.113	PLCD4,NAPEPLD,PLCB4,ABHD3,PLA2G7,PAFAH1B3,PLCH1
Sperm Motility	0.0134896	-2.52982	0.088	PRKCD,PLCD4,GNAS,NPR1,PLCB4,CACNA1G,CAMK4,ABHD3,PLA2G7,PRKACA,PAFAH1B3
CNTF Signaling	0.0141254	-1.13389	0.111	FGFR3,FGFR2,JAK2,RPS6KA3,RPS6KA1,IRS1,GAB1
PCP pathway	0.0141254	-2.44949	0.111	LGR4,CTHRC1,FZD1,MAPK12,SMO,SDC3,FZD9
Guanosine Nucleotides Degradation III	0.0144544	NaN	0.231	NT5M,PNP,NT5E
Role of Osteoblasts, Osteoclasts and Chondrocytes in Rheumatoid Arthritis	0.0147911	NaN	0.0733	FGFR3,FGFR2,TNFRSF1B,ITGA3,MAPK12,SMO,IRS1,CAMK4,SMAD4,GAB1,FZD9,NGFR,FZD1,CSF1,LRP6,IL33,TRAF6
PPARα/RXRα Activation	0.0147911	-2.3094	0.0787	PLCD4,JAK2,ADCY6,PLCB4,INSR,IRS1,SMAD4,GNAS,ADCY2,CREBBP,PRKACA,ADCY8,PRKAB2,TRAF6
Prostate Cancer Signaling	0.0147911	NaN	0.0957	FGFR3,FGFR2,ATF4,PDPK1,CCNE1,IRS1,CREBBP,GSTP1,GAB1
Glutathione Redox Reactions I	0.0154882	NaN	0.167	GSTM2,GSTP1,Gstt1,MGST3
Role of Macrophages, Fibroblasts and Endothelial Cells in Rheumatoid Arthritis	0.0162181	NaN	0.068	FGFR3,FGFR2,PLCD4,JAK2,TNFRSF1B,PLCB4,SMO,CAMK2D,IRS1,CAMK4,GAB1,FZD9,PRKCD,ATF4,NGFR,FZD1,CSF1,LRP6,CREBBP,IL33,TRAF6
GNRH Signaling	0.0165959	-2.7136	0.0853	PRKCD,GNAS,ATF4,ADCY6,PLCB4,MAPK12,CAMK2D,ADCY2,CREBBP,PRKACA,ADCY8
UVB-Induced MAPK Signaling	0.0177828	NaN	0.106	FGFR3,FGFR2,PRKCD,MAPK12,RPS6KA3,IRS1,GAB1
Urate Biosynthesis/Inosine 5'-phosphate Degradation	0.0177828	NaN	0.214	NT5M,PNP,NT5E
Integrin Signaling	0.018197	-2.13809	0.0731	FGFR3,FGFR2,TSPAN2,ITGA3,PPP1R12A,IRS1,PARVA,ACTN1,GAB1,ARPC2,RHOG,CAPN5,RHOV,RHOF,FNBP1,ARPC1A
p70S6K Signaling	0.0186209	-2.52982	0.084	FGFR3,FGFR2,PRKCD,YWHAQ,PLCD4,PDPK1,PLCB4,IRS1,IL4R,GAB1,PPP2R2A
Lymphotoxin β Receptor Signaling	0.0190546	-0.816497	0.104	FGFR3,FGFR2,PDPK1,IRS1,CREBBP,GAB1,TRAF6
Prolactin Signaling	0.0199526	-1.13389	0.0964	FGFR3,FGFR2,PRKCD,PDPK1,JAK2,IRS1,CREBBP,GAB1
HMGB1 Signaling	0.0204174	-3.31662	0.0827	FGFR3,RHOG,FGFR2,NGFR,TNFRSF1B,MAPK12,IRS1,GAB1,RHOV,RHOF,FNBP1
FcγRIIB Signaling in B Lymphocytes	0.0204174	-1.63299	0.113	FGFR3,FGFR2,PDPK1,MAPK12,IRS1,GAB1
LPS/IL-1 Mediated Inhibition of RXR Function	0.0204174	-0.447214	0.0721	ABCC4,ALDH1L1,TNFRSF1B,FABP7,ACSL6,ALDH9A1,GSTO1,NGFR,ACSBG1,GSTM2,APOE,GSTP1,HS3ST1,IL33,MGST3,TRAF6
Gluconeogenesis I	0.0204174	NaN	0.154	ENO3,ME3,ENO4,ALDOC
Adipogenesis pathway	0.0213796	NaN	0.0821	FGFR3,FGFR2,FZD1,CTBP2,CTNNBIP1,SMO,ZNF423,RPS6KA1,HDAC11,HDAC9,FZD9
D-myo-inositol (1,4,5)-Trisphosphate Biosynthesis	0.0229087	NaN	0.148	PLCD4,PLCB4,PLCH1,PIP5K1B
Xenobiotic Metabolism Signaling	0.0269153	NaN	0.0662	FGFR3,FGFR2,ALDH1L1,MAPK12,CAMK2D,IRS1,CAMK4,GAB1,PPP2R2A,ALDH9A1,PRKCD,GSTO1,CAMK1,GSTM2,CREBBP,UGT8,GSTP1,HS3ST1,MGST3
ErbB4 Signaling	0.0275423	-1.63299	0.0972	FGFR3,FGFR2,PRKCD,PDPK1,IRS1,YAP1,GAB1
GPCR-Mediated Integration of Enteroendocrine Signaling Exemplified by an L Cell	0.0275423	NaN	0.0972	PLCD4,GNAS,ADCY6,PLCB4,ADCY2,PRKACA,ADCY8
STAT3 Pathway	0.0295121	-0.377964	0.0959	FGFR3,FGFR2,PIAS3,NGFR,JAK2,MAPK12,INSR
Adenosine Nucleotides Degradation II	0.0301995	NaN	0.176	NT5M,PNP,NT5E
Superpathway of Inositol Phosphate Compounds	0.030903	NaN	0.0684	FGFR3,FGFR2,PLCD4,PPP1R12A,DUSP15,PLCB4,PPP1R7,IRS1,GAB1,PLCH1,IPPK,ITPKB,SSH3,EYA4,PIP5K1B,NUDT14
Gustation Pathway	0.030903	NaN	0.0806	PDE8A,NAPEPLD,PDE8B,ENPP6,ADCY6,ASIC2,ADCY2,GNG2,PRKACA,ADCY8
Sonic Hedgehog Signaling	0.0323594	-1	0.133	GLIS2,GLI1,SMO,PRKACA
IL-1 Signaling	0.0323594	-1.88982	0.0879	GNAS,ADCY6,MAPK12,ADCY2,GNG2,PRKACA,ADCY8,TRAF6
MSP-RON Signaling Pathway	0.0331131	NaN	0.102	FGFR3,FGFR2,JAK2,CSF1,IRS1,GAB1
Role of IL-17F in Allergic Inflammatory Airway Diseases	0.0331131	0.447214	0.114	ATF4,RPS6KA3,RPS6KA1,CREBBP,TRAF6
iNOS Signaling	0.0331131	1	0.114	JAK2,MAPK12,CAMK4,CREBBP,TRAF6
IL-6 Signaling	0.0354813	-1.89737	0.0787	FGFR3,FGFR2,NGFR,JAK2,TNFRSF1B,MAPK12,IRS1,GAB1,IL33,TRAF6
Amyotrophic Lateral Sclerosis Signaling	0.0380189	NaN	0.0811	FGFR3,FGFR2,NEFH,GLUL,GRIK1,CAPN5,GRIN2D,IRS1,GAB1
IL-17A Signaling in Airway Cells	0.0380189	-1.13389	0.0909	FGFR3,FGFR2,JAK2,MAPK12,IRS1,GAB1,TRAF6
Aldosterone Signaling in Epithelial Cells	0.0398107	-2.52982	0.0723	FGFR3,FGFR2,PRKCD,PLCD4,PDPK1,HSPA12A,PLCB4,IRS1,ASIC2,DNAJC1,GAB1,PIP5K1B
Glutamine Biosynthesis I	0.040738	NaN	1	GLUL,
Methylglyoxal Degradation VI	0.040738	NaN	1	LDHD,
UDP-N-acetyl-D-galactosamine Biosynthesis I	0.040738	NaN	1	GALE,
Xanthine and Xanthosine Salvage	0.040738	NaN	1	PNP,
Sumoylation Pathway	0.042658	-1.41421	0.0833	RHOG,CTBP2,MAPK12,CREBBP,SMAD4,RHOV,RHOF,FNBP1
Erythropoietin Signaling	0.042658	NaN	0.0886	FGFR3,FGFR2,PRKCD,PDPK1,JAK2,IRS1,GAB1
ERK5 Signaling	0.0436516	-0.816497	0.0952	YWHAQ,ATF4,RPS6KA3,RPS6KA1,CREBBP,GAB1
Circadian Rhythm Signaling	0.0446684	NaN	0.121	ATF4,GRIN2D,CREBBP,ADCYAP1R1
Purine Nucleotides Degradation II (Aerobic)	0.0457088	NaN	0.15	NT5M,PNP,NT5E
Macropinocytosis Signaling	0.047863	-2.44949	0.0864	FGFR3,FGFR2,PRKCD,USP6NL,CSF1,IRS1,GAB1
Thrombopoietin Signaling	0.0489779	-1.63299	0.0923	FGFR3,FGFR2,PRKCD,JAK2,IRS1,GAB1
Pancreatic Adenocarcinoma Signaling	0.0524807	-1.88982	0.0763	FGFR3,FGFR2,NAPEPLD,JAK2,MAPK12,CCNE1,IRS1,SMAD4,GAB1
Oxidative Ethanol Degradation III	0.0524807	NaN	0.143	ALDH9A1,ALDH1L1,ACSS1
NRF2-mediated Oxidative Stress Response	0.0537032	0	0.0674	FGFR3,FGFR2,ABCC4,IRS1,DNAJC1,GAB1,PRKCD,GSTO1,ATF4,GSTM2,CREBBP,GSTP1,MGST3
GABA Receptor Signaling	0.0549541	NaN	0.0896	SLC6A11,ALDH9A1,GNAS,ADCY6,ADCY2,ADCY8
Role of IL-17A in Arthritis	0.0549541	NaN	0.0896	FGFR3,FGFR2,MAPK12,RPS6KA1,IRS1,GAB1
Cholecystokinin/Gastrin-mediated Signaling	0.0549541	-2.82843	0.0792	RHOG,PRKCD,PLCB4,MAPK12,RHOV,RHOF,IL33,FNBP1
RANK Signaling in Osteoclasts	0.0549541	-0.707107	0.0792	FGFR3,FGFR2,MAPK12,IRS1,CAMK4,MITF,GAB1,TRAF6
Small Cell Lung Cancer Signaling	0.0562341	NaN	0.0833	FGFR3,FGFR2,PIAS3,CCNE1,IRS1,GAB1,TRAF6
Gαi Signaling	0.057544	-0.333333	0.075	GNAS,ADCY6,S1PR3,ADCY2,GNG2,ADRA2A,PRKACA,ADCY8,S1PR1
IL-17 Signaling	0.0588844	NaN	0.0824	FGFR3,FGFR2,JAK2,MAPK12,IRS1,GAB1,TRAF6
Docosahexaenoic Acid (DHA) Signaling	0.060256	NaN	0.0962	FGFR3,FGFR2,PDPK1,IRS1,GAB1
Hepatic Cholestasis	0.0616595	NaN	0.0692	PRKCD,NGFR,TNFRSF1B,ADCY6,MAPK12,INSR,ADCY2,PRKACA,ADCY8,IL33,TRAF6
Chronic Myeloid Leukemia Signaling	0.0630957	NaN	0.0769	FGFR3,FGFR2,CTBP2,IRS1,HDAC11,SMAD4,GAB1,HDAC9
Role of NANOG in Mammalian Embryonic Stem Cell Pluripotency	0.0630957	-1.34164	0.0738	FGFR3,FGFR2,JAK2,FZD1,SMO,IRS1,SMAD4,GAB1,FZD9
Remodeling of Epithelial Adherens Junctions	0.0630957	NaN	0.087	ARPC2,TUBB2A,TUBA1B,ACTN1,TUBB4B,ARPC1A
Myc Mediated Apoptosis Signaling	0.0660693	NaN	0.0857	FGFR3,FGFR2,YWHAQ,MAPK12,IRS1,GAB1
Melatonin Signaling	0.0691831	-0.816497	0.0845	PRKCD,PLCD4,PLCB4,CAMK2D,CAMK4,PRKACA
Role of JAK1 and JAK3 in γc Cytokine Signaling	0.0691831	NaN	0.0845	FGFR3,FGFR2,JAK2,IRS1,IL4R,GAB1
IGF-1 Signaling	0.0691831	-1.13389	0.0755	FGFR3,FGFR2,YWHAQ,PDPK1,JAK2,IRS1,PRKACA,GAB1
Ovarian Cancer Signaling	0.0707946	NaN	0.0694	FGFR3,FGFR2,FZD1,SMO,IRS1,PRKACA,GAB1,FGF9,FZD9,GJA1
Netrin Signaling	0.074131	NaN	0.103	ABLIM3,UNC5B,PRKACA,ABLIM2
tRNA Splicing	0.074131	NaN	0.103	PDE8A,NAPEPLD,PDE8B,ENPP6
Melanoma Signaling	0.074131	NaN	0.0909	FGFR3,FGFR2,IRS1,MITF,GAB1
Epithelial Adherens Junction Signaling	0.0758578	NaN	0.0685	ARPC2,TUBB2A,EPN3,LMO7,TUBA1B,MYL6B,MYH10,ACTN1,TUBB4B,ARPC1A
GM-CSF Signaling	0.0776247	-1.63299	0.0822	FGFR3,FGFR2,JAK2,CAMK2D,IRS1,GAB1
Ethanol Degradation IV	0.0794328	NaN	0.12	ALDH9A1,ALDH1L1,ACSS1
Adenine and Adenosine Salvage I	0.0794328	NaN	0.5	PNP,
Alanine Biosynthesis II	0.0794328	NaN	0.5	GPT2,
Alanine Degradation III	0.0794328	NaN	0.5	GPT2,
Asparagine Degradation I	0.0794328	NaN	0.5	ASPG,
Choline Degradation I	0.0794328	NaN	0.5	CHDH,
Cysteine Biosynthesis/Homocysteine Degradation	0.0794328	NaN	0.5	CBS/CBSL,
Guanine and Guanosine Salvage I	0.0794328	NaN	0.5	PNP,
L-DOPA Degradation	0.0794328	NaN	0.5	LRTOMT,
Putrescine Biosynthesis III	0.0794328	NaN	0.5	ODC1,
Estrogen Receptor Signaling	0.0794328	NaN	0.0703	PCK2,POLR2A,CTBP2,G6PC3,MED27,MED17,CREBBP,DDX5,MED13
Glioma Signaling	0.0812831	-2.12132	0.0727	FGFR3,FGFR2,PRKCD,CAMK1,CAMK2D,IRS1,CAMK4,GAB1
Glycogen Degradation II	0.0831764	NaN	0.167	PYGM,PYGB
Factors Promoting Cardiogenesis in Vertebrates	0.0831764	NaN	0.0761	PRKCD,FZD1,CCNE1,SMO,LRP6,SMAD4,FZD9
Antiproliferative Role of Somatostatin Receptor 2	0.0851138	-2.23607	0.08	FGFR3,FGFR2,NPR1,IRS1,GNG2,GAB1
Telomerase Signaling	0.0851138	-1.63299	0.0721	FGFR3,FGFR2,PDPK1,IRS1,HDAC11,GAB1,HDAC9,PPP2R2A
Antiproliferative Role of TOB in T Cell Signaling	0.0870964	NaN	0.115	CCNE1,RPS6KA1,SMAD4
Glycolysis I	0.0870964	NaN	0.115	ENO3,ENO4,ALDOC
Wnt/β-catenin Signaling	0.0870964	-0.707107	0.0651	SOX8,FZD1,SMO,TLE1,LRP6,CREBBP,SOX13,TLE4,PPP2R2A,FZD9,GJA1
CD28 Signaling in T Helper Cells	0.0891251	-0.333333	0.0687	ARPC2,FGFR3,FGFR2,PDPK1,MAPK12,IRS1,CAMK4,GAB1,ARPC1A
Paxillin Signaling	0.0912011	-2.12132	0.0708	FGFR3,FGFR2,ITGA3,MAPK12,IRS1,PARVA,ACTN1,GAB1
BMP signaling pathway	0.0912011	0.447214	0.0789	MAPK12,ZNF423,CAMK4,CREBBP,SMAD4,PRKACA
GDNF Family Ligand-Receptor Interactions	0.0912011	-2.44949	0.0789	FGFR3,FGFR2,MAPK12,RET,IRS1,GAB1
IL-15 Signaling	0.0912011	NaN	0.0789	FGFR3,FGFR2,JAK2,MAPK12,IRS1,GAB1
Fatty Acid Activation	0.0954993	NaN	0.154	ACSBG1,ACSL6
Estrogen-Dependent Breast Cancer Signaling	0.0954993	-1.63299	0.0779	FGFR3,FGFR2,ATF4,IRS1,CREBBP,GAB1
Role of p14/p19ARF in Tumor Suppression	0.0977237	2	0.093	FGFR3,FGFR2,IRS1,GAB1
CD40 Signaling	0.1	-1.63299	0.0769	FGFR3,FGFR2,MAPK12,IRS1,GAB1,TRAF6
ErbB Signaling	0.10617	NaN	0.0714	FGFR3,FGFR2,PRKCD,PDPK1,MAPK12,IRS1,GAB1
TR/RXR Activation	0.10617	NaN	0.0714	FGFR3,FGFR2,THRSP,COL6A3,IRS1,CAMK4,GAB1
p38 MAPK Signaling	0.106414	-0.816497	0.0684	ATF4,TNFRSF1B,MAPK12,RPS6KA3,RPS6KA1,CREBBP,IL33,TRAF6
Glycogen Degradation III	0.109648	NaN	0.143	PYGM,PYGB
Regulation of eIF4 and p70S6K Signaling	0.110154	-1.88982	0.0637	FGFR3,FGFR2,EIF3G,PDPK1,ITGA3,MAPK12,IRS1,GAB1,EIF3I,PPP2R2A
FAK Signaling	0.110408	NaN	0.0707	FGFR3,FGFR2,PDPK1,CAPN5,ITGA3,IRS1,GAB1
IL-9 Signaling	0.110662	-2	0.0889	FGFR3,FGFR2,IRS1,GAB1
Sertoli Cell-Sertoli Cell Junction Signaling	0.113501	NaN	0.0618	TUBB2A,EPN3,CLDN11,DLG1,ITGA3,MAPK12,TUBA1B,ACTN1,CGN,PRKACA,TUBB4B
1D-myo-inositol Hexakisphosphate Biosynthesis V (from Ins(1,3,4)P3)	0.117761	NaN	0.333	IPPK,
Coenzyme A Biosynthesis	0.117761	NaN	0.333	COASY,
D-glucuronate Degradation I	0.117761	NaN	0.333	DCXR,
Diphthamide Biosynthesis	0.117761	NaN	0.333	DPH6,
Inosine-5'-phosphate Biosynthesis II	0.117761	NaN	0.333	PAICS,
L-carnitine Biosynthesis	0.117761	NaN	0.333	ALDH9A1,
Thiosulfate Disproportionation III (Rhodanese)	0.117761	NaN	0.333	TST,
Huntington's Disease Signaling	0.118577	-1.66667	0.0581	FGFR3,FGFR2,POLR2A,PLCB4,IRS1,GAB1,PRKCD,ATF4,PDPK1,CAPN5,CREBBP,GNG2,HDAC11,HDAC9
NF-κB Signaling	0.11995	-1.50756	0.0611	FGFR3,FGFR2,NGFR,TNFRSF1B,INSR,IRS1,CREBBP,PRKACA,GAB1,IL33,TRAF6
Endometrial Cancer Signaling	0.120226	NaN	0.0781	FGFR3,FGFR2,PDPK1,IRS1,GAB1
Chondroitin Sulfate Degradation (Metazoa)	0.12331	NaN	0.133	GALNS,ARSB
Vitamin-C Transport	0.12331	NaN	0.133	GSTO1,TXNRD3
IL-3 Signaling	0.123595	-1.63299	0.0723	FGFR3,FGFR2,PRKCD,JAK2,IRS1,GAB1
JAK/Stat Signaling	0.123595	-0.816497	0.0723	FGFR3,FGFR2,PIAS3,JAK2,IRS1,GAB1
Pyridoxal 5'-phosphate Salvage Pathway	0.126183	NaN	0.0769	PRKCD,GRK5,LIMK2,LIMK1,ADPGK
SAPK/JNK Signaling	0.133352	-1.63299	0.0673	FGFR3,FGFR2,MAP4K5,MAPK12,IRS1,GNG2,GAB1
γ-glutamyl Cycle	0.137404	NaN	0.125	CHAC1,GGCT
LPS-stimulated MAPK Signaling	0.139637	-2.44949	0.0698	FGFR3,FGFR2,PRKCD,MAPK12,IRS1,GAB1
NF-κB Activation by Viruses	0.139637	-2.44949	0.0698	FGFR3,FGFR2,PRKCD,ITGA3,IRS1,GAB1
IL-12 Signaling and Production in Macrophages	0.14388	NaN	0.0616	FGFR3,FGFR2,PRKCD,CLU,MAPK12,IRS1,APOE,GAB1,TRAF6
Synaptic Long Term Depression	0.14388	-3	0.0616	PRKCD,PLCD4,GNAS,NPR1,PLCB4,ABHD3,PLA2G7,PAFAH1B3,PPP2R2A
EGF Signaling	0.144544	-2.23607	0.0735	FGFR3,FGFR2,MAPK12,IRS1,GAB1
Atherosclerosis Signaling	0.148936	NaN	0.063	CLU,CSF1,ABHD3,PLA2G7,APOE,TNFRSF12A,PAFAH1B3,IL33
G Beta Gamma Signaling	0.150661	-1.63299	0.0682	PRKCD,GNAS,PDPK1,ADCY2,GNG2,PRKACA
HER-2 Signaling in Breast Cancer	0.150661	NaN	0.0682	FGFR3,FGFR2,PRKCD,CCNE1,IRS1,GAB1
VEGF Family Ligand-Receptor Interactions	0.150661	-2.23607	0.0682	FGFR3,FGFR2,PRKCD,NRP1,IRS1,GAB1
CCR5 Signaling in Macrophages	0.151008	NaN	0.0725	PRKCD,GNAS,MAPK12,CAMK4,GNG2
ErbB2-ErbB3 Signaling	0.151008	-1.34164	0.0725	FGFR3,FGFR2,PDPK1,IRS1,GAB1
Mitochondrial L-carnitine Shuttle Pathway	0.151705	NaN	0.118	ACSBG1,ACSL6
Regulation of the Epithelial-Mesenchymal Transition Pathway	0.152055	NaN	0.0582	FGFR3,FGFR2,FGF12,JAK2,FZD1,SMO,IRS1,SMAD4,GAB1,FGF9,FZD9
Leukocyte Extravasation Signaling	0.152757	-2.11058	0.0571	FGFR3,FGFR2,PRKCD,CLDN11,DLC1,ITGA3,MAPK12,IRS1,ACTN1,GAB1,MMP15,RAPGEF3
PI3K Signaling in B Lymphocytes	0.153462	-1.13389	0.0625	PLCD4,ATF4,PDPK1,PLCB4,CAMK2D,IRS1,CAMK4,IL4R
Acetate Conversion to Acetyl-CoA	0.153815	NaN	0.25	ACSS1,
Ascorbate Recycling (Cytosolic)	0.153815	NaN	0.25	GSTO1,
Phenylalanine Degradation I (Aerobic)	0.153815	NaN	0.25	QDPR,
Proline Biosynthesis I	0.153815	NaN	0.25	PYCRL,
Amyloid Processing	0.154525	NaN	0.0784	CAPN5,MAPK12,MARK1,PRKACA
RAR Activation	0.155955	NaN	0.0579	PRKCD,NRIP2,PDPK1,JAK2,ADCY6,MAPK12,ADCY2,CREBBP,SMAD4,PRKACA,ADCY8
IL-4 Signaling	0.156315	NaN	0.0674	FGFR3,FGFR2,JAK2,IRS1,IL4R,GAB1
Androgen Signaling	0.169044	-0.447214	0.0631	PRKCD,GNAS,POLR2A,CAMK4,CREBBP,GNG2,PRKACA
Cell Cycle Regulation by BTG Family Proteins	0.170608	NaN	0.0857	CCNE1,CNOT7,PPP2R2A
Dopamine Degradation	0.170608	NaN	0.0857	ALDH9A1,ALDH1L1,LRTOMT
Basal Cell Carcinoma Signaling	0.171002	-1	0.0694	GLIS2,FZD1,GLI1,SMO,FZD9
Ephrin B Signaling	0.177828	NaN	0.0685	GNAS,ITSN2,LIMK1,GNG2,EPHB2
Nitric Oxide Signaling in the Cardiovascular System	0.179887	-1.88982	0.0619	FGFR3,FGFR2,PRKCD,IRS1,CAMK4,PRKACA,GAB1
PPAR Signaling	0.180302	0.816497	0.0645	NGFR,TNFRSF1B,INSR,CREBBP,IL33,TRAF6
Interferon Signaling	0.180717	NaN	0.0833	JAK2,IFIT3,TAP1
1D-myo-inositol Hexakisphosphate Biosynthesis II (Mammalian)	0.180717	NaN	0.105	IPPK,ITPKB
Histamine Degradation	0.180717	NaN	0.105	ALDH9A1,ALDH1L1
Clathrin-mediated Endocytosis Signaling	0.183654	NaN	0.0558	ARPC2,FGFR3,FGFR2,FGF12,CLU,IRS1,APOE,EPHB2,GAB1,FGF9,ARPC1A
Creatine-phosphate Biosynthesis	0.188365	NaN	0.2	CKMT1A/CKMT1B,
Eumelanin Biosynthesis	0.188365	NaN	0.2	DDT,
Galactose Degradation I (Leloir Pathway)	0.188365	NaN	0.2	GALE,
Serine Biosynthesis	0.188365	NaN	0.2	PSAT1,
Tetrahydrofolate Salvage from 5,10-methenyltetrahydrofolate	0.188365	NaN	0.2	MTHFD2,
HGF Signaling	0.190985	-2.64575	0.0609	FGFR3,FGFR2,PRKCD,ITGA3,MAPK12,IRS1,GAB1
HIF1α Signaling	0.190985	NaN	0.0609	FGFR3,FGFR2,MAPK12,IRS1,CREBBP,GAB1,MMP15
Ethanol Degradation II	0.191426	NaN	0.0811	ALDH9A1,ALDH1L1,ACSS1
3-phosphoinositide Biosynthesis	0.192309	NaN	0.0553	FGFR3,FGFR2,PPP1R12A,DUSP15,SSH3,PPP1R7,EYA4,IRS1,GAB1,PIP5K1B,NUDT14
Salvage Pathways of Pyrimidine Ribonucleotides	0.192752	NaN	0.0632	PRKCD,GRK5,LIMK2,LIMK1,PYCRL,ADPGK
Granzyme A Signaling	0.195884	NaN	0.1	CREBBP,H1F0
Regulation of Cellular Mechanics by Calpain Protease	0.203236	NaN	0.0702	CAPN5,ITGA3,CCNE1,ACTN1
Non-Small Cell Lung Cancer Signaling	0.206538	-1.34164	0.0649	FGFR3,FGFR2,PDPK1,IRS1,GAB1
D-myo-inositol-5-phosphate Metabolism	0.213304	NaN	0.0559	PLCD4,PPP1R12A,DUSP15,SSH3,PLCB4,PPP1R7,EYA4,PLCH1,NUDT14
Fc Epsilon RI Signaling	0.213796	-1.88982	0.0588	FGFR3,FGFR2,PRKCD,PDPK1,MAPK12,IRS1,GAB1
PTEN Signaling	0.213796	0.377964	0.0588	FGFR3,FGFR2,PDPK1,NGFR,ITGA3,INSR,FOXO4
Hepatic Fibrosis / Hepatic Stellate Cell Activation	0.216272	NaN	0.0546	FGFR2,COL6A3,NGFR,COL15A1,TNFRSF1B,CSF1,IL4R,MYL6B,MYH10,SMAD4
CTLA4 Signaling in Cytotoxic T Lymphocytes	0.218273	NaN	0.0606	FGFR3,FGFR2,JAK2,IRS1,GAB1,PPP2R2A
Arginine Degradation VI (Arginase 2 Pathway)	0.221309	NaN	0.167	PYCRL,
Glycine Cleavage Complex	0.221309	NaN	0.167	GCSH,
Pentose Phosphate Pathway (Non-oxidative Branch)	0.221309	NaN	0.167	TKT,
Proline Biosynthesis II (from Arginine)	0.221309	NaN	0.167	PYCRL,
Thioredoxin Pathway	0.221309	NaN	0.167	TXNRD3,
Noradrenaline and Adrenaline Degradation	0.223357	NaN	0.075	ALDH9A1,ALDH1L1,LRTOMT
Transcriptional Regulatory Network in Embryonic Stem Cells	0.223357	NaN	0.075	PAX6,ZIC3,SKIL
Hereditary Breast Cancer Signaling	0.225424	NaN	0.0563	FGFR3,FGFR2,POLR2A,IRS1,CREBBP,HDAC11,GAB1,HDAC9
Fatty Acid α-oxidation	0.225944	NaN	0.0909	ALDH9A1,ALDH1L1
Polyamine Regulation in Colon Cancer	0.225944	NaN	0.0909	MXD1,ODC1
B Cell Receptor Signaling	0.225944	-1.26491	0.0541	FGFR3,FGFR2,ATF4,PDPK1,MAPK12,CAMK2D,IRS1,CAMK4,CREBBP,GAB1
Induction of Apoptosis by HIV1	0.229615	-2	0.0667	SLC25A10,NGFR,TNFRSF1B,MAPK12
iCOS-iCOSL Signaling in T Helper Cells	0.231739	-1.13389	0.0574	FGFR3,FGFR2,PDPK1,CAMK2D,IRS1,CAMK4,GAB1
Stearate Biosynthesis I (Animals)	0.234423	NaN	0.0732	ACSBG1,ACOT7,ACSL6
Renal Cell Carcinoma Signaling	0.236048	-2	0.0617	FGFR3,FGFR2,IRS1,CREBBP,GAB1
Virus Entry via Endocytic Pathways	0.238232	NaN	0.0588	FGFR3,FGFR2,PRKCD,ITGA3,IRS1,GAB1
Putrescine Degradation III	0.241546	NaN	0.087	ALDH9A1,ALDH1L1
Cdc42 Signaling	0.244343	-1.66667	0.0539	ARPC2,LIMK2,ITGA3,PPP1R12A,MAPK12,LIMK1,MYL6B,CDC42EP2,ARPC1A
Adenine and Adenosine Salvage III	0.253513	NaN	0.143	PNP,
Ceramide Biosynthesis	0.253513	NaN	0.143	SPTSSB,
Glycoaminoglycan-protein Linkage Region Biosynthesis	0.253513	NaN	0.143	XYLT2,
NAD Biosynthesis from 2-amino-3-carboxymuconate Semialdehyde	0.253513	NaN	0.143	NADSYN1,
Superpathway of Serine and Glycine Biosynthesis I	0.253513	NaN	0.143	PSAT1,
FXR/RXR Activation	0.256448	NaN	0.0556	PCK2,CLU,G6PC3,MAPK12,CREBBP,APOE,IL33
PEDF Signaling	0.259418	-2.23607	0.0595	FGFR3,FGFR2,MAPK12,IRS1,GAB1
Cell Cycle: G1/S Checkpoint Regulation	0.265461	2	0.0625	CCNE1,HDAC11,SMAD4,HDAC9
IL-2 Signaling	0.265461	-2	0.0625	FGFR3,FGFR2,IRS1,GAB1
Th2 Pathway	0.271019	-1.13389	0.0533	FGFR3,FGFR2,JAK2,IRS1,IL4R,GAB1,IL33,S1PR1
Role of JAK family kinases in IL-6-type Cytokine Signaling	0.27227	NaN	0.08	JAK2,MAPK12
Tryptophan Degradation X (Mammalian, via Tryptamine)	0.27227	NaN	0.08	ALDH9A1,ALDH1L1
PXR/RXR Activation	0.274157	NaN	0.0615	PCK2,GSTM2,INSR,PRKACA
TGF-β Signaling	0.283139	1	0.0575	MAPK12,ZNF423,CREBBP,SMAD4,TRAF6
Histidine Degradation III	0.283792	NaN	0.125	MTHFD2,
Inositol Pyrophosphates Biosynthesis	0.283792	NaN	0.125	IPPK,
Purine Ribonucleosides Degradation to Ribose-1-phosphate	0.283792	NaN	0.125	PNP,
NAD Salvage Pathway II	0.28774	NaN	0.0769	NT5M,NT5E
IL-10 Signaling	0.301995	NaN	0.0588	MAPK12,IL4R,IL33,TRAF6
PDGF Signaling	0.306902	-1.34164	0.0556	FGFR3,FGFR2,JAK2,IRS1,GAB1
Folate Transformations I	0.313329	NaN	0.111	MTHFD2,
Leucine Degradation I	0.313329	NaN	0.111	BCAT1,
Phosphatidylethanolamine Biosynthesis II	0.313329	NaN	0.111	ETNK2,
Sucrose Degradation V (Mammalian)	0.313329	NaN	0.111	ALDOC,
Acute Myeloid Leukemia Signaling	0.314775	-2.23607	0.0549	FGFR3,FGFR2,FLT3,IRS1,GAB1
Superpathway of Cholesterol Biosynthesis	0.31842	NaN	0.0714	PMVK,DHCR7
Death Receptor Signaling	0.322849	-2.23607	0.0543	TIPARP,PARP16,TNFRSF1B,TNFRSF21,LIMK1
Role of Pattern Recognition Receptors in Recognition of Bacteria and Viruses	0.327341	-1.88982	0.0511	FGFR3,FGFR2,PRKCD,MAPK12,IRS1,GAB1,TRAF6
Role of MAPK Signaling in the Pathogenesis of Influenza	0.339625	NaN	0.0556	MAPK12,ABHD3,PLA2G7,PAFAH1B3
Glycine Betaine Degradation	0.341193	NaN	0.1	SARDH,
Pentose Phosphate Pathway	0.341193	NaN	0.1	TKT,
Role of NFAT in Regulation of the Immune Response	0.34435	-2.12132	0.0486	FGFR3,FGFR2,GNAS,PLCB4,IRS1,CAMK4,GNG2,GAB1,AKAP5
Th1 and Th2 Activation Pathway	0.34435	NaN	0.0486	FGFR3,FGFR2,JAK2,IRS1,IL4R,GAB1,NFIL3,IL33,S1PR1
Aryl Hydrocarbon Receptor Signaling	0.347536	NaN	0.05	ALDH9A1,GSTO1,ALDH1L1,CCNE1,GSTM2,GSTP1,MGST3
Purine Nucleotides De Novo Biosynthesis II	0.368129	NaN	0.0909	PAICS,
UDP-N-acetyl-D-galactosamine Biosynthesis II	0.368129	NaN	0.0909	GALE,
Tight Junction Signaling	0.374111	NaN	0.0479	CLDN11,NGFR,TNFRSF1B,MYL6B,MYH10,CGN,PRKACA,PPP2R2A
LXR/RXR Activation	0.374111	0.447214	0.0496	ABCG4,NGFR,TNFRSF1B,CLU,APOE,IL33
Role of PI3K/AKT Signaling in the Pathogenesis of Influenza	0.376704	-2	0.0526	FGFR3,FGFR2,IRS1,GAB1
Fatty Acid β-oxidation I	0.378443	NaN	0.0625	ACSBG1,ACSL6
Acute Phase Response Signaling	0.386367	-0.377964	0.0473	PDPK1,NGFR,JAK2,TNFRSF1B,MAPK12,ITIH3,IL33,TRAF6
Angiopoietin Signaling	0.386367	NaN	0.0519	FGFR3,FGFR2,IRS1,GAB1
Glucocorticoid Receptor Signaling	0.391742	NaN	0.0453	FGFR3,PCK2,FGFR2,JAK2,POLR2A,MAPK12,IRS1,SMAD4,GAB1,CREBBP,PRKACA,PRKAB2,TRAF6
Acyl-CoA Hydrolysis	0.39355	NaN	0.0833	ACOT7,
BER pathway	0.39355	NaN	0.0833	LIG1,
Hematopoiesis from Multipotent Stem Cells	0.39355	NaN	0.0833	CSF1,
PI3K/AKT Signaling	0.395367	-0.447214	0.0484	YWHAQ,PDPK1,JAK2,ITGA3,GAB1,PPP2R2A
Cyclins and Cell Cycle Regulation	0.395367	NaN	0.0513	CCNE1,HDAC11,HDAC9,PPP2R2A
VDR/RXR Activation	0.395367	0	0.0513	SERPINB1,PRKCD,KLK6,MXD1
Oncostatin M Signaling	0.40738	NaN	0.0588	CHI3L1,JAK2
Role of JAK2 in Hormone-like Cytokine Signaling	0.40738	NaN	0.0588	JAK2,IRS1
VEGF Signaling	0.413048	-1.34164	0.0485	FGFR3,FGFR2,IRS1,ACTN1,GAB1
ATM Signaling	0.414	-1	0.05	ATF4,MAPK12,TLK1,CREBBP
EIF2 Signaling	0.416869	-0.707107	0.0452	FGFR3,FGFR2,EIF3G,ATF4,PDPK1,RPL21,INSR,IRS1,GAB1,EIF3I
Cholesterol Biosynthesis I	0.418794	NaN	0.0769	DHCR7,
Cholesterol Biosynthesis II (via 24,25-dihydrolanosterol)	0.418794	NaN	0.0769	DHCR7,
Cholesterol Biosynthesis III (via Desmosterol)	0.418794	NaN	0.0769	DHCR7,
Choline Biosynthesis III	0.418794	NaN	0.0769	NAPEPLD,
Mevalonate Pathway I	0.418794	NaN	0.0769	PMVK,
IL-17A Signaling in Fibroblasts	0.421697	NaN	0.0571	MAPK12,TRAF6
Granulocyte Adhesion and Diapedesis	0.436516	NaN	0.0452	CLDN11,NGFR,TNFRSF1B,ITGA3,MMP15,CXCL14,SDC3,IL33
Systemic Lupus Erythematosus Signaling	0.438531	NaN	0.0444	FGFR3,FGFR2,PRPF38B,ZMAT5,LSM11,IRS1,CAMK4,GAB1,PRPF19,IL33
Gα12/13 Signaling	0.439542	-2.44949	0.0462	FGFR3,FGFR2,MAPK12,IRS1,MYL6B,GAB1
Colanic Acid Building Blocks Biosynthesis	0.442588	NaN	0.0714	GALE,
DNA Double-Strand Break Repair by Homologous Recombination	0.442588	NaN	0.0714	LIG1,
Isoleucine Degradation I	0.442588	NaN	0.0714	BCAT1,
3-phosphoinositide Degradation	0.461318	NaN	0.0446	PPP1R12A,DUSP15,SSH3,PPP1R7,EYA4,INPP4B,NUDT14
T Cell Receptor Signaling	0.461318	NaN	0.0459	FGFR3,FGFR2,IRS1,CAMK4,GAB1
Antigen Presentation Pathway	0.463447	NaN	0.0526	TAP2,TAP1
April Mediated Signaling	0.463447	NaN	0.0526	MAPK12,TRAF6
NAD biosynthesis II (from tryptophan)	0.465586	NaN	0.0667	NADSYN1,
nNOS Signaling in Skeletal Muscle Cells	0.465586	NaN	0.0667	CAMK4,
Activation of IRF by Cytosolic Pattern Recognition Receptors	0.467735	NaN	0.0484	MAPK12,CREBBP,TRAF6
Type I Diabetes Mellitus Signaling	0.468813	-0.447214	0.0455	NGFR,JAK2,TNFRSF1B,MAPK12,TRAF6
Th1 Pathway	0.475335	-1.63299	0.0444	FGFR3,FGFR2,JAK2,IRS1,GAB1,NFIL3
p53 Signaling	0.476431	1.34164	0.045	FGFR3,FGFR2,IRS1,GAB1,HDAC9
Bladder Cancer Signaling	0.477529	NaN	0.046	FGFR3,FGF12,MMP15,FGF9
tRNA Charging	0.477529	NaN	0.0513	YARS,AARS
Methylglyoxal Degradation III	0.487528	NaN	0.0625	Akr1b10,
Parkinson's Signaling	0.487528	NaN	0.0625	MAPK12,
B Cell Activating Factor Signaling	0.490908	NaN	0.05	MAPK12,TRAF6
Neuroprotective Role of THOP1 in Alzheimer's Disease	0.490908	NaN	0.05	PNOC,PRKACA
Superpathway of Geranylgeranyldiphosphate Biosynthesis I (via Mevalonate)	0.508159	NaN	0.0588	PMVK,
Ubiquinol-10 Biosynthesis (Eukaryotic)	0.508159	NaN	0.0588	COQ3,
Agranulocyte Adhesion and Diapedesis	0.510505	NaN	0.0423	CLDN11,ITGA3,MYL6B,MYH10,MMP15,CXCL14,PODXL2,IL33
UVC-Induced MAPK Signaling	0.516416	NaN	0.0476	PRKCD,MAPK12
Eicosanoid Signaling	0.519996	NaN	0.0448	ABHD3,PLA2G7,PAFAH1B3
Valine Degradation I	0.528445	NaN	0.0556	BCAT1,
Fcγ Receptor-mediated Phagocytosis in Macrophages and Monocytes	0.529663	0	0.043	ARPC2,PRKCD,NAPEPLD,ARPC1A
Pyrimidine Ribonucleotides Interconversion	0.529663	NaN	0.0465	CTPS2,ENTPD2
Role of RIG1-like Receptors in Antiviral Innate Immunity	0.529663	NaN	0.0465	CREBBP,TRAF6
D-myo-inositol (1,4,5,6)-Tetrakisphosphate Biosynthesis	0.532108	NaN	0.042	PPP1R12A,DUSP15,SSH3,PPP1R7,EYA4,NUDT14
D-myo-inositol (3,4,5,6)-tetrakisphosphate Biosynthesis	0.532108	NaN	0.042	PPP1R12A,DUSP15,SSH3,PPP1R7,EYA4,NUDT14
Cysteine Biosynthesis III (mammalia)	0.547016	NaN	0.0526	CBS/CBSL,
D-myo-inositol (1,3,4)-trisphosphate Biosynthesis	0.547016	NaN	0.0526	ITPKB,
DNA damage-induced 14-3-3σ Signaling	0.547016	NaN	0.0526	CCNE1,
GADD45 Signaling	0.547016	NaN	0.0526	CCNE1,
Pyrimidine Ribonucleotides De Novo Biosynthesis	0.55335	NaN	0.0444	CTPS2,ENTPD2
Natural Killer Cell Signaling	0.561048	NaN	0.041	FGFR3,FGFR2,PRKCD,IRS1,GAB1
Cardiomyocyte Differentiation via BMP Receptors	0.566239	NaN	0.05	SMAD4,
The Visual Cycle	0.566239	NaN	0.05	Akr1b10,
T Helper Cell Differentiation	0.578096	NaN	0.0411	NGFR,TNFRSF1B,IL4R
Endoplasmic Reticulum Stress Pathway	0.583445	NaN	0.0476	ATF4,
Maturity Onset Diabetes of Young (MODY) Signaling	0.583445	NaN	0.0476	INSR,
Primary Immunodeficiency Signaling	0.588844	NaN	0.0417	TAP2,TAP1
TCA Cycle II (Eukaryotic)	0.616595	NaN	0.0435	CS,
CDP-diacylglycerol Biosynthesis I	0.632412	NaN	0.0417	AGPAT4,
Estrogen-mediated S-phase Entry	0.632412	NaN	0.0417	CCNE1,
IL-22 Signaling	0.632412	NaN	0.0417	MAPK12,
Role of JAK1, JAK2 and TYK2 in Interferon Signaling	0.632412	NaN	0.0417	JAK2,
Superpathway of D-myo-inositol (1,4,5)-trisphosphate Metabolism	0.632412	NaN	0.0417	ITPKB,
4-1BB Signaling in T Lymphocytes	1	NaN	0.0323	MAPK12,
Agrin Interactions at Neuromuscular Junction	1	NaN	0.029	ITGA3,MAPK12
Altered T Cell and B Cell Signaling in Rheumatoid Arthritis	1	NaN	0.0222	CSF1,IL33
Apoptosis Signaling	1	NaN	0.0337	CAPN5,TNFRSF1B,RPS6KA1
Assembly of RNA Polymerase II Complex	1	NaN	0.02	POLR2A,
CD27 Signaling in Lymphocytes	1	NaN	0.0192	MAPK12,
Calcium-induced T Lymphocyte Apoptosis	1	NaN	0.0303	PRKCD,CAMK4
Cancer Drug Resistance By Drug Efflux	1	NaN	0.0204	FOXO4,
Caveolar-mediated Endocytosis Signaling	1	NaN	0.0282	ITGA3,INSR
Cell Cycle Control of Chromosomal Replication	1	NaN	0.0263	LIG1,
Cell Cycle: G2/M DNA Damage Checkpoint Regulation	1	NaN	0.0408	YWHAQ,RPS6KA1
Chondroitin Sulfate Biosynthesis	1	NaN	0.0345	XYLT2,HS3ST1
Chondroitin Sulfate Biosynthesis (Late Stages)	1	NaN	0.02	HS3ST1,
Communication between Innate and Adaptive Immune Cells	1	NaN	0.0225	CD83,IL33
Crosstalk between Dendritic Cells and Natural Killer Cells	1	NaN	0.0337	CD83,TNFRSF1B,CAMK2D
Dermatan Sulfate Biosynthesis	1	NaN	0.0333	XYLT2,HS3ST1
Dermatan Sulfate Biosynthesis (Late Stages)	1	NaN	0.0213	HS3ST1,
Graft-versus-Host Disease Signaling	1	NaN	0.0208	IL33,
Hematopoiesis from Pluripotent Stem Cells	1	NaN	0.0213	CSF1,
Heparan Sulfate Biosynthesis	1	NaN	0.0361	AARS,XYLT2,HS3ST1
Heparan Sulfate Biosynthesis (Late Stages)	1	NaN	0.0263	AARS,HS3ST1
Hypoxia Signaling in the Cardiovascular System	1	NaN	0.0308	ATF4,CREBBP
IL-15 Production	1	NaN	0.037	JAK2,
IL-17A Signaling in Gastric Cells	1	NaN	0.04	MAPK12,
Inhibition of Angiogenesis by TSP1	1	NaN	0.0294	MAPK12,
Inhibition of Matrix Metalloproteases	1	NaN	0.0256	MMP15,
MIF Regulation of Innate Immunity	1	NaN	0.0244	MAPK12,
Mechanisms of Viral Exit from Host Cells	1	NaN	0.0244	PRKCD,
Mitochondrial Dysfunction	1	NaN	0.0234	ATP5O,MAPK12,NDUFB7,LRRK2
Mitotic Roles of Polo-Like Kinase	1	NaN	0.0152	PPP2R2A,
Neuregulin Signaling	1	NaN	0.0341	PRKCD,PDPK1,ITGA3
Nucleotide Excision Repair Pathway	1	NaN	0.0286	POLR2A,
Nur77 Signaling in T Lymphocytes	1	NaN	0.0339	CAMK4,HDAC9
OX40 Signaling Pathway	1	NaN	0.0112	MAPK12,
Oxidative Phosphorylation	1	NaN	0.0183	ATP5O,NDUFB7
PKCθ Signaling in T Lymphocytes	1	-2.23607	0.0379	FGFR3,FGFR2,CAMK2D,IRS1,GAB1
Phagosome Maturation	1	NaN	0.0347	TUBB2A,CTSC,TUBA1B,TAP1,TUBB4B
Phosphatidylglycerol Biosynthesis II (Non-plastidic)	1	NaN	0.0385	AGPAT4,
Phototransduction Pathway	1	NaN	0.0189	PRKACA,
Protein Ubiquitination Pathway	1	NaN	0.0392	UBR2,USP3,UBE4B,TAP2,HSPA12A,DNAJC1,TAP1,PSMB10,NEDD4L,TRAF6
Regulation of IL-2 Expression in Activated and Anergic T Lymphocytes	1	NaN	0.038	MAPK12,CAMK4,SMAD4
Retinoate Biosynthesis I	1	NaN	0.0294	Akr1b10,
Retinoic acid Mediated Apoptosis Signaling	1	NaN	0.0328	TIPARP,PARP16					Bias-corrected z-score	p-value of overlap	Target molecules in dataset	Mechanistic Network
Retinol Biosynthesis	1	NaN	0.025	Akr1b10,					0.875	9.1e-18	ANKRD13A,ANLN,ARHGEF10,ASPA,CARHSP1,CCP110,CLDN11,CYP51A1,DUSP15,FA2H,FGFR2,G2E3,GLUL,HHIP,JAM3,KIF19,KLHL2,MAL,MAP4K4,MCAM,MOBP,NDE1,OLIG2,OTUD7B,PEX5L,PHACTR4,PIGA,PIM3,PLP1,QKI,RHOG,SEMA4D,SLC1A2,SLC22A23,SYDE2,TMEM141,TMEM63A,TNS1,TRIM59,TSPAN15,TSPAN2,UGT8
Role of CHK Proteins in Cell Cycle Checkpoint Control	1	NaN	0.0364	TLK1,PPP2R2A					-2.274	1.11e-07	ALDOC,CSAD,CYP51A1,DHCR7,FADS2,GPAM,Gstt3,IDI1,MSMO1,MVD,PDPK1	SCAP,SREBF1,SREBF2
Role of Cytokines in Mediating Communication between Immune Cells	1	NaN	0.0185	IL33,					-2.691	6.08e-06	ALDOC,CSAD,CYP51A1,DHCR7,FADS1,FADS2,GPAM,Gstt3,HMGCS1,IDI1,MSMO1,MVD,PCK2,PDPK1,RPS24,Scd2,THRSP,TNNI1	SCAP,SREBF1,SREBF2
Role of Hypercytokinemia/hyperchemokinemia in the Pathogenesis of Influenza	1	NaN	0.0233	IL33,					2.417	1.6e-05	APOE,CCR5,CYP51A1,DHCR7,FADS1,FADS2,GPAM,HMGCS1,IDI1,PLA2G7,PLD1,Scd2	INSIG1,SREBF1,SREBF2
Role of Oct4 in Mammalian Embryonic Stem Cell Pluripotency	1	NaN	0.0217	JARID2,					-1.303	2.06e-05	GJA1,MITF,NGFR,NOTCH1,OLIG1,PLP1,PMP22,SMOC1
Role of PKR in Interferon Induction and Antiviral Response	1	NaN	0.025	TRAF6,					0.075	4.56e-05	Acot1,ADCYAP1R1,ADRA2A,APOE,ATP1A2,CA2,CCR5,CD82,Cdkn1c,COL15A1,CST3,FAM49A,FGFR2,GGCT,GJA1,GPAM,Gstt1,HSD11B1,HUNK,IGFBP2,LAMA2,NDRG2,NFKBIA,P2RX4,PISD,PLA2G7,PLIN4,PMP22,PTBP3,Scd2,SHD,ST3GAL4,THRSP
Role of Wnt/GSK-3β Signaling in the Pathogenesis of Influenza	1	NaN	0.0395	FZD1,SMO,FZD9					-2.008	8.15e-05	CYP51A1,DHCR7,HMGCS1,IDI1,MVD
Serotonin Degradation	1	NaN	0.027	ALDH9A1,ALDH1L1					0.175	0.000115	EDNRB,MITF,NGFR,NOTCH1,PLP1,PMP22
Superpathway of Methionine Degradation	1	NaN	0.0312	CBS/CBSL,					-2.037	0.000127	ALDOC,CYP51A1,DHCR7,FADS2,HMGCS1,IDI1,MSMO1,MVD,THRSP	SREBF1,SREBF2
TNFR2 Signaling	1	NaN	0.0345	TNFRSF1B,					-1.136	0.000159	Acot1,APOE,ATXN3,C8orf44-SGK3/SGK3,CA2,CABP7,CACNA1G,CCR5,CDC42EP4,CHGA,CHI3L1,CLU,CYP51A1,DDX17,DHCR7,DNAJC1,DSCAM,ELF1,ETV4,FADS1,FGFR2,FGFR3,FNBP1,GJA1,GPAM,GPSM2,GSTP1,Gstt1,HMGCS1,HSD11B1,HUNK,IGFBP2,IPO4,KLK6,L3MBTL1,LRP8,MAL,MSMO1,NDRG2,NEDD4L,NFE2L3,NFKBIA,NRIP3,ODC1,OSBPL7,PAQR7,PIAS3,PLA2G4A,PMP22,PNP,POLR2A,PPL,PPP1R3C,PRKCD,PSAT1,S1PR1,SDC3,SFXN5,SLC24A3,SLC6A9,SLC8A1,SLC9A3R1,SMOC1,S…	CREBBP,ESR2,beta-estradiol
TREM1 Signaling	1	NaN	0.0267	CD83,JAK2					0.098	0.000194	ABHD3,CA2,FADS1,LRP8,MCAM,PLA2G4A,SLC7A11,TNS3
TWEAK Signaling	1	NaN	0.0294	TNFRSF12A,					1.187	0.000273	ABR,APOE,ARRDC3,CA2,CCR5,CD82,CDC42EP4,CHI3L1,CIB2,CLDN11,CLU,COL15A1,COL2A1,COTL1,CREB3,CTSC,DDX5,EDNRB,EHD1,FADS1,FGFR2,FNBP1,FOXO4,FYN,GJA1,GPAM,GPRC5B,GRM3,GSTM2,GSTP1,Gstt1,HIPK3,HSD11B1,IGFBP2,IL33,JARID2,LRIG1,LRRC8D,MAP4K4,MCAM,MFSD2A,MTDH,NFKBIA,NGFR,NOTCH1,ODC1,OTUD7B,PCK2,PIM3,PLA2G4A,PLIN4,PLP1,PPP1R3C,PRKCD,PSMB10,QKI,RASD1,RGCC,S1PR3,SERPINB1,SERPIND1,SLC1A2,SLC8A1,THRSP,TNS3,TRAF6,…	CREBBP,ESR2,TNF,beta-estradiol
Thyroid Cancer Signaling	1	NaN	0.025	RET,					1.621	0.000288	ABLIM3,Acot1,ADRA2A,APOE,CCR5,CDC42EP4,CDH19,Cdkn1c,CHI3L1,CHST3,CLU,COL2A1,COL6A3,COTL1,CREB3,CST3,CTSC,DDR2,DDX5,DISP2,EDNRB,FGF12,FGFR2,FNBP1,FYN,FZD1,GJA1,GLI1,GNAS,GPRC5B,GRM7,HEXIM1,IDI1,IGFBP2,IL33,ITIH3,KLF15,MITF,MSMO1,MTHFD2,MVD,NBEA,NFKBIA,NFYC,NOTCH1,NPR1,PCOLCE2,PITPNM1,PLA2G4A,PNP,PPP1R3C,PPP2R2A,PRIM1,RGCC,S1PR3,SERPINB1,SLC1A2,SLC26A11,SPARCL1,SPRY1,SRSF4,SRSF6,SUSD5,TCF12,TLE4,UN…
Toll-like Receptor Signaling	1	NaN	0.0405	MAPK12,IL33,TRAF6					0.897	0.000301	APOE,ATP1A2,Cdkn1c,COL15A1,FZD1,GJA1,Gstt1,LAMA2,NDRG2,PRKCD,RHOG,Scd2,SHD,THRSP
Triacylglycerol Biosynthesis	1	NaN	0.0217	AGPAT4,						0.000346	ALDOC,NGFR,PLCB4
Triacylglycerol Degradation	1	NaN	0.0189	AARS,					-0.812	0.000405	Acot1,ANAPC5,COTL1,CST3,CYP51A1,DHCR7,ENO3,FNBP1,GJA1,GNAS,HIST1H1C,IDI1,Scd2
Unfolded protein response	1	NaN	0.037	INSIG1,ATF4					1.848	0.000444	Acot1,ADRA2A,ALDH1L1,EDNRB,FGF12,FZD1,GJA1,GLUL,GPRC5B,NFKBIA,PCK2,S1PR3,SLC1A2,SLC7A11
autophagy	1	NaN	0.0167	CTSC,					0.583	0.000444	ABCG4,CYTH1,GLUL,MAST1,MMP15,OGT,PRKCQ,TEX2,TMEM246
						0.333		-0.083	0.583	0.000444	ABCG4,CYTH1,GLUL,MAST1,MMP15,OGT,PRKCQ,TEX2,TMEM246
						-1.633		-0.019	-1.587	0.000515	CYP51A1,HIST1H1C,HMGCS1,IDI1,MSMO1,THRSP
						1.191		-0.015	1.277	0.000516	AI987944 (includes others),CDC42EP2,Cdkn1c,CIB2,COTL1,CTNNBIP1,CTSC,EDNRB,FNIP1,GNAS,IGFBP2,KCNA6,KIAA1161,MFSD2A,MITF,MSMO1,NAPRT,NEDD4L,PDE4DIP,PLEKHO2,PPP1R2,PPP2R2A,ROBO2,SH3PXD2B,SLC1A2,SRPK3,TAOK1,TMC6,TMEM106C,TMEM141,TRPC3,TTYH1,WDR1
										0.000527	CA2,DLG1,HHIP,LAMA2,PLP1,QKI,RHBDF1,SESN2,SLC7A11
						-2.162		-0.089	-1.816	0.000531	ATP13A4,Cdkn1c,CKAP4,CLDN11,DHCR7,DISP2,EDNRB,FGFR2,GJA1,GSTP1,LRIG1,MAD2L2,MSMO1,MTHFD2,NGFR,NOTCH1,ODC1,PIAS3,PIGA,PRKCD,S1PR3,SLC7A11,VCAN,VSNL1
										0.000593	FADS1,FADS2,THRSP
						-1.506		-0.002	-1.499	0.00083	Abca8a,C8orf44-SGK3/SGK3,CYP51A1,DHCR7,ELF1,FNBP1,GLUL,GPAM,GRM7,HMGCS1,IDI1,LRP8,MSMO1,MVD,NOTCH1,PAQR7,PRKCD,PSMB10,RNPEP,SLC1A2,ST5,THRSP,TNS1,TTC39A	CREBBP,ESR2,beta-estradiol,valproic acid
						1.475		-0.024	1.547	0.000853	CLU,FADS1,FADS2,GLI1,NFKBIA,PLA2G4A,PLD1,RPS14,THRSP	SREBF1,SREBF2,arachidonic acid
						1.134		-0.041	1.304	0.000919	Acot1,ANAPC5,APOE,CSAD,CYP51A1,DHCR7,FADS1,FADS2,GLUL,GPAM,GSTP1,Gstt1,HIST1H1C,HMGCS1,IDI1,IGFBP2,MSMO1,MVD,NFKBIA,PAQR7,PLA2G7,PLIN4,SARDH	PPARA,SREBF1,SREBF2
						1.39		-0.03	1.487	0.000929	CST3,CYB5R1,CYP51A1,DHCR7,FADS1,HMGCS1,IDI1,KEAP1,MSMO1,NFKBIA,SLC7A11
										0.00093	GJA1,GLI1,HHIP
										0.00093	APOE,NGFR,PMP22
						2.178		0.053	2.029	0.00103	Acot1,CSAD,CYP51A1,DHCR7,FADS2,Gstt3,HMGCS1,IDI1,MSMO1,MVD,PLA2G7,RAB30,Scd2
						-0.555		-0.129	-0.27	0.00104	CBS/CBSL,FYN,PSAT1,SESN2,SLC7A11
						-2.236		-0.031	-2.167	0.00122	CYP51A1,DHCR7,HMGCS1,IDI1,MVD
						0.478		-0.09	0.715	0.00159	CA2,CCR5,COL2A1,FGFR3,FNBP1,GLI1,GNAS,GRIN2D,HMGCS1,HSD11B1,NOTCH1,PHIP,PITPNM1,PPM1E,PRKCD,RPS6KA1,SLC1A2,SLC7A11,SMOC1,TAP2,THRSP
						-0.852		-0.109	-0.468	0.00162	CACNA1G,Cdkn1c,CHGA,CLU,COL2A1,CTHRC1,CYP51A1,DDX17,EHD1,ENO3,ETV4,GJA1,GLI1,GLUL,HHIP,IGFBP2,MITF,MMP15,NDRG2,NFAT5,NGFR,NOTCH1,OLIG1,P2RX7,PMP22,POLR2A,SLC1A2,TCF12,TLE4,VCAN,ZIC1,ZIC5
										0.00202	LGI4,MAL,NGFR,PMP22
										0.00205	GJA1,SLC1A2
						0.845		0.014	0.818	0.00242	GLI1,MITF,ODC1,PMP22
						-1.98		-0.113	-1.757	0.00242	CYP51A1,HMGCS1,IDI1,MVD	PPARA,SREBF1,pitavastatin
										0.00288	CA2,CHI3L1,DLG1,EPS8,HIPK3,LRP8,MAP4K4,ODC1,PLD1,QKI,SEMA4D,SEMA6D,TAOK1
						-0.028		-0.041	0.1	0.00351	CYB5R1,ENHO,GSTO1,LRRC8D,MTHFD2,ODC1,PCK2,PSAT1,SLC6A9,SMYD2
						-2.191		0.051	-2.357	0.00353	ARPC1B,FGFR3,GRM7,HS3ST1,MAST1,NBEA,PHKG1,PNP,ROBO2,SESN2,SON,TST
						0.21		-0.079	0.53	0.0036	ADCY8,APOE,CACNA1G,CCR5,CHGA,CLU,GLUL,GSTP1,HHIP,HS3ST1,HSD11B1,KCTD3,MCAM,ODC1,SLC1A2,SLC9A3R1,WHRN	CTNNB1,bucladesine
						-0.495		0.138	-1.003	0.00376	ARPC1B,ATL3,DNAJC1,EYA4,FA2H,FAM129B,FAM57A,KLF15,MAD2L2,PARP16,RHOG,TRAF6,TSPAN15,VSNL1
						-1.804		0.027	-1.906	0.00396	Acot1,APOE,CA2,Cdkn1c,CHI3L1,CLU,COL15A1,EDNRB,GJA1,HSD11B1,LAMA2,NFKBIA,P2RX7,PLA2G4A,SLC1A2,VCAN	CTNNB1,FOS,dexamethasone,mifepristone
						-0.192		-0.025	-0.011	0.00402	ADRA2A,ALDH1L1,APOE,ATP10B,CA2,Cdkn1c,CHGA,CHI3L1,COL15A1,COL9A2,CST3,CYP51A1,DLG1,EDNRB,ETNK2,FGGY,GGCT,GJA1,GLI1,GLUL,GPR153,GSTP1,HOMER2,HSD11B1,HUNK,IGFBP2,IL33,KLF15,LAMA2,LRP8,MATN4,MID1IP1,NEDD4L,NFKBIA,NGFR,NPR1,ODC1,P2RX7,PCK2,PLD1,POLR2A,PPP1R14C,PRKCQ,RASD1,RGCC,Scd2,SERTAD2,SLC1A2,SLC46A1,SPARCL1,SPRY1,SRSF4,ST3GAL4,ST5,SULF2,TAP2,THRSP,TNS1,TSPAN2,TSPAN33,VCAN,WDR1,ZIC2	CTNNB1,FOS,dexamethasone
										0.00404	COL2A1,GLI1
										0.00404	GLI1,HHIP	CTNNB1,SUFU
						-1.422		-0.033	-1.305	0.00406	ADCYAP1R1,Cdkn1c,CHGA,DCDC2,FGFR2,GLI1,MCAM,NFKBIA,QKI,RGCC,SERPINB1,SEZ6L,SLC1A2,TTYH1
						0		-0.041	0.116	0.00417	CHST3,FGFR2,HMGCS1,IGFBP2,OLIG1,PLA2G4A,PYGM,SLC24A3
										0.00431	ALDOC,NGFR,PLCB4
						1.886		0.013	1.831	0.00433	ABLIM3,ALDOC,APOE,CCR5,Cdkn1c,DHCR7,ELF1,EPS8,GDF11,GLUL,GPT2,HMGCS1,LRIG1,MCAM,MSMO1,PIAS3,RPS6KA3,Scd2,THSD1
						-0.768		-0.071	-0.432	0.00442	ADAMTS16,ALDOC,ATP1B3,CD82,CDC42EP2,CHDH,CLU,COL6A3,ETV4,GJA1,GPAM,HOMER2,KIFC3,MAST1,MITF,NOTCH1,PAICS,PCK2,PDE8A,PDPK1,POLR2A,PRIM1,QKI,RPS10,SLC1A6,SPARCL1,ST3GAL4,STMN3,TAP2,THSD1,TOP1MT,VCAN
										0.0048	DHCR7,FADS2,HMGCS1,IDI1,MSMO1
						0.543		-0.02	0.609	0.00489	APOE,CA2,CABP7,CBS/CBSL,CLDN11,DHCR7,DNAJC1,EYA4,Fbxw21 (includes others),GGCT,GPSM2,GSTP1,MPP7,NDRG2,NFE2L3,PPP1R3C,PSAT1,SLC9A3R1,SMOC1,THRSP,TNS3	CREBBP,ESR2,beta-estradiol
										0.005	ATRX,EYA4,GJA1,GPRC5B,IGFBP2,PLCB4,S1PR3,SLC1A2,TNS3,VCAN
										0.00537	ODC1,PRKCD,PRKCQ
										0.00537	NFKBIA,OTUD7B,TRAF6
						-1		-0.138	-0.725	0.00597	MMP15,PRKCD,S1PR3,SLC9A3R1
						0		-0.108	0.216	0.00597	OLIG2,PCK2,PLP1,PSAT1
						-1.4		-0.101	-1.178	0.00597	CBS/CBSL,FGFR2,GPAM,NOTCH1,NPR1,Scd2,THRSP
						-0.665		-0.028	-0.567	0.00608	ABCF3,ABCG4,ARPC1B,CKAP4,CLU,EEF1D,FGFR2,JARID2,NGFR,ODC1,OLIG1,RPL39,RPS24,SLC1A2,TUBA1B
						-2		-0.116	-1.767	0.00625	CACNG5,CLU,EDNRB,FGFR3,LRP8,ODC1,PLCB4,PMP22,PSMB10,RGCC,Scd2,SLC7A11,SPARCL1,VSNL1
										0.00659	ALDOC,CHGA,MITF
										0.00659	CYP51A1,DHCR7,MSMO1	SREBF1,SREBF2,isoquercitrin
										0.00661	ZIC1,ZIC2
										0.00661	GSTM2,GSTP1
										0.00671	FADS1,FADS2,GLUL,Gstt3,PCOLCE2,SERPINB1,SLC1A2,THRSP
						0.389		-0.033	0.497	0.00697	Cdkn1c,CHDH,ENTPD2,GPR37L1,IL33,KLF15,NFKBIA,NGFR,PLXNB3,ROBO2,VCAN
						-2.282		-0.067	-2.035	0.00728	Abca8a,ADRA2A,CLU,CYP51A1,FGFR2,FGFR3,MAL,NFKBIA,NGFR,ODC1,PMP22,SLC25A10,SLC6A9,SNRNP25,TAP2,UGT8,VCAN	CREBBP,ESR2,beta-estradiol,testosterone
						-2.065		-0.043	-1.935	0.00733	ABCA8,Acot1,APOE,DHCR7,FADS1,FADS2,GPAM,HSD11B1,MID1IP1,NFKBIA,Scd2,THRSP,TKT	PPARA,SREBF1,SREBF2,TO-901317
						-0.598		-0.118	-0.25	0.00758	DDR2,FYN,IGFBP2,MID1IP1,MTHFD2,PCK2,PMP22,PSAT1,SLC6A9,SLC7A11
										0.00795	ADRA2A,CHGA,GNAS
										0.00847	CA2,CD82,GSTP1,PLD1,PMP22,TNNI1
						1.978		-0.028	2.095	0.0088	ADCY6,ARSB,ASPA,CST3,CTSC,EDNRB,EPN2,GSTP1,KCNJ16,KLF15,MTDH,NDE1,ODC1,OPLAH,PAQR7,PIM3,PPL,PSAT1,QDPR,RGCC,SCLY,SERPINB1,SLC25A10,SLC4A4
						1.826		-0.043	1.952	0.00918	CA2,CHGA,CHI3L1,CLU,DLG1,EPS8,GJA1,GPSM2,GSTP1,HIPK3,LRP8,MAP4K4,ODC1,PLA2G4A,PLD1,PPP2R2A,QKI,RPL39,RPS24,SEMA4D,SEMA6D,SHISA6,SULF2,TAOK1
						-0.447		-0.087	-0.252	0.00926	CSF2RA,FGFR2,PLP1,ZIC2,ZIC4
										0.00931	ATP1B2,ATP1B3,DLG1,MCAM,MOBP,PITPNM1,PRKCD,THRSP,VSNL1
										0.00947	GSTP1,NFKBIA,SLC7A11
										0.00974	APOE,CBS/CBSL
										0.0098	GSTP1,NGFR,NPR1,PLA2G7,PYGM,RPS14,TUBA1B
										0.0107	CTHRC1,EDNRB,FGFR3,PLCB4,PMP22,RGCC,Scd2,SPARCL1,VSNL1
						2		0.113	1.775	0.0109	CYP51A1,DHCR7,GJA1,HMGCS1,MSMO1
						1.134		0.015	1.094	0.011	ARRDC2,GPAM,IGFBP2,ITIH3,MAD2L2,MAL,MVD
										0.0111	DHCR7,IDI1,MVD
						-2.067		-0.083	-1.808	0.012	ADCYAP1R1,COL2A1,GPT2,HSD11B1,MTDH,MVD,NFKBIA,PCK2,PIGA,SESN2,SLC7A11
						1.026		0.039	0.923	0.0125	Cdkn1c,MITF,NGFR,NOTCH1,PMP22,PRKCD,PRKCQ,RGCC,S1PR1,SLC4A4,TRPC3
										0.0129	ACSL6,APOE,ARSG,GSTM2,GSTP1,Gstt3,NFKBIA,PPP1R3C,Scd2,SLC1A2,SULF2
						0		-0.044	0.138	0.013	Cdkn1c,CHDH,ENTPD2,GPR37L1,IL33,KLF15,NGFR,PLXNB3,ROBO2,VCAN
										0.0134	APOE,GLI1
										0.0134	ADCY6,GNAS
										0.0134	COL2A1,FGFR3
						0.313		-0.07	0.581	0.0135	EDNRB,FGFR2,FGFR3,FOXO4,GJA1,GLI1,GRM7,IGFBP2,MCAM,MITF,NGFR,NOTCH1,ODC1,OLIG2,PRKCD,SPRY1,ST3GAL4
						1.534		-0.055	1.686	0.0142	CST3,DHCR7,HIPK3,HMGCS1,HUNK,KLF15,MSMO1,NOTCH1,PLA2G4A,PLP1,SEMA6D,UNC5B,VCAN
						0.578		0.138	0.131	0.0144	ANKRD29,AP3B1,CTSC,DDX5,FAM57A,GJA1,MTHFD2,OSBPL7,PNP,SH3PXD2B,WDFY1
						-0.447		-0.008	-0.43	0.0149	GSTM2,IGFBP2,MCAM,QKI,ST3GAL4
						-0.875		-0.013	-0.841	0.0149	ANLN,AP3B1,CA2,FGFR2,FGFR3,GPAM,HS3ST1,MAL,MSMO1,NOTCH1,PAFAH1B3,RASA4
										0.015	FADS1,FADS2,GPAM
										0.015	ALDH1L1,OLIG2,PLD1
						-0.651		-0.03	-0.585	0.0152	MAL,NDRG2,POLR2A,PPP1R3C,SEMA6D,ZIC5
						-0.077		-0.019	0.036	0.0159	ANAPC5,ANLN,AP3B1,APOE,ARSG,CA2,CCP110,CDC42EP2,COTL1,CSAD,CTSC,DCDC2,DDX17,DHCR7,DLG1,DNAJC1,FGF12,FGFR2,FOXO4,GJA1,GNAS,GNG12,GPAM,GPSM2,HIP1R,IGFBP2,LATS2,NFAT5,NFE2L3,NFKBIA,NGFR,NOTCH1,PCDHB6,PLS1,PPP1R3C,PRKCD,PSAT1,ROBO2,SLC7A11,SLC9A3R1,SON,TAOK1,TNS3,UNC119,WASF2,WHRN,ZMAT5
										0.0165	CA2,CIB2,GJA1,PDE8A,PHKG1,Scd2,THRSP,TKT
						0.061		-0.109	0.397	0.0165	CST3,EDNRB,GJA1,MCAM,MITF,ODC1,PLCB4,PRKCD,SLC1A2,SLC8A1,VCAN
						0.361		-0.067	0.669	0.0165	ADAMTS16,ALDOC,ARPC1A,CLU,COL15A1,DHCR7,FGFR2,GJA1,GLI1,GNAS,GPRC5B,GSTP1,HHIP,HSD11B1,MAP4K4,MITF,MSMO1,NFKBIA,ODC1,PIM3,PPP1R3C,RPS10,S1PR3,SLC1A2,SLC7A11,THRSP,VCAN
						1.265		0.018	1.208	0.0169	ETV4,FGFR2,IL33,MCAM,Mt3,PPP1R2,PTPN3,SARDH,SPARCL1,TTYH1
										0.0171	DLG1,GLUL,PHLPP1
										0.0171	COL2A1,DLG1,SLC8A1
										0.0171	Cdkn1c,CLMN,SESN2
										0.0171	KCNJ16,KLF15,VSNL1
						0		0.138	-0.275	0.0175	CTNNBIP1,NOTCH1,ODC1,PDPK1
										0.0176	GLI1,HSD11B1
										0.0176	APOE,TCF12
										0.0176	FADS1,FADS2
										0.0176	COL2A1,GJA1
										0.0176	Cdkn1c,LATS2
						0.308		-0.062	0.493	0.0177	ACSL6,APOE,Cdkn1c,CSAD,GPAM,IGFBP2,MFSD2A,MMD2,OCEL1,PDPK1,PLP1
						-0.652		-0.053	-0.505	0.0177	CHI3L1,CLU,COL2A1,FGFR2,FGFR3,GLI1,SDC3,UNC5B,VCAN
						0.174		-0.104	0.446	0.0186	CLDN11,COL2A1,EEF1D,GJA1,SDC3,TNS1,TSPAN2
						-0.82		-0.04	-0.716	0.0188	CA2,CTSC,FGFR2,GJA1,GPT2,HHIP,NOTCH1,PLP1
										0.0191	2810468N07Rik,HHIP,IL33,SUSD5
										0.0191	CSF2RA,KEAP1,NDRG2,NOTCH1
										0.0194	FOXO4,HMGCS1,Scd2
										0.0194	CIB2,THRSP,TKT
										0.0194	CHI3L1,ENO3,SPARCL1
						2.2		0.03	2.135	0.0201	ADCYAP1R1,CACNA1G,COTL1,ETV4,FADS1,FADS2,GJA1,HIST1H1C,HS3ST1,NFKBIA,S1PR3
										0.0206	ACSL6,ARSG,GSTM2,GSTP1,Gstt3,PPP1R3C,Scd2,SLC1A2,SULF2
										0.0219	MTHFD2,PSAT1,SLC7A11
										0.0222	OLIG2,PLP1
										0.0222	CHGA,NOTCH1
						-1.432		0.11	-1.675	0.0224	APOE,GJA1,MTDH,SLC1A2,SLC8A1
						-1.081		-0.12	-0.726	0.023	ALDOC,CKAP4,EPS8,GPAM,KIAA1147,MTDH,PSAT1,Scd2,SLAIN1
						2.985		-0.042	3.109	0.0236	Acot1,APOE,CCR5,DHCR7,FADS1,HMGCS1,IDI1,MITF,MSMO1,PSAT1,RGCC
										0.0238	APOE,ENO3,MCAM,Scd2,THRSP,TNNI1
										0.0238	CD82,GDF11,GPAM,NFKBIA,PHLPP1,SLC1A2
										0.0244	ANLN,CCR5,NDE1,NFKBIA
						0.01		-0.093	0.338	0.0256	ADCYAP1R1,CLDN11,CLU,DDX25,DHCR7,FYN,FZD1,GGCT,GJA1,HSD11B1,IGFBP2,IL33,MCAM,NPR1,SLC4A4,VCAN
						-0.493		-0.016	-0.448	0.0261	ALDH1L1,DDX17,GLUL,GNAS,GPR153,HSD11B1,NFKBIA,PLA2G4A
						0.8		0.017	0.753	0.0261	APOE,ATP1A2,CCR5,CTSC,DSCAML1,GDF11,GJA1,GSTP1,HIST1H2BD,LRP8,Mt3,NOTCH1,OCEL1,QDPR,SLC1A2,TUBA1B,VSNL1
						-0.128		-0.124	0.175	0.0263	Cdkn1c,COL9A3,FGFR3,NGFR,PIM3,SPARCL1
										0.0264	CCR5
										0.0264	APOE
										0.0264	APOE
										0.0264	PLA2G4A
										0.0264	CCR5
										0.0264	CHGA
										0.0264	APOE
										0.0264	ATXN3
										0.0264	CTHRC1
										0.0264	OTUD7B
										0.0264	EHD1
										0.0264	PAFAH1B3
										0.0264	FGFR3
										0.0264	FGFR3
										0.0264	SLC8A1
										0.0264	HIST1H1C
										0.0264	MATN4
										0.0264	ODC1
										0.0264	Cdkn1c
										0.0264	GJA1
										0.0264	GJA1
										0.0264	PPP2R2A
										0.0264	GSTP1
										0.0264	GSTP1
										0.0264	SLC1A2
										0.0264	SLC8A1
										0.0264	CCR5
										0.0264	GSTP1
										0.0264	CHGA
										0.0264	GNAS
										0.0264	ODC1
										0.0264	APOE
										0.0264	ENPP6
										0.0264	KCNJ16
										0.0264	NGFR
										0.0264	NGFR
										0.0264	CHGA
										0.0264	NGFR
										0.0264	CCR5
										0.0264	NGFR
										0.0272	PLA2G4A,PLP1
										0.0272	FAM57A,SERPINB1
										0.0274	HEXIM1,POLR2A,SRSF6
										0.0274	GSTP1,Gstt1,NFKBIA
										0.0274	ABCG4,APOE,CYP51A1
						-0.822		-0.044	-0.7	0.0282	ABCA8,CLU,COL6A3,CYP51A1,HMGCS1,MAL,Scd2,SPARCL1
										0.0285	APOE,COL2A1,GJA1,IGFBP2
						-0.674		0.045	-0.79	0.0285	CTHRC1,EPS8,HOMER2,NOTCH1,PRKCD,PYGB,SERPINB1,SHISA6,SNX22
						-1.342		-0.061	-1.205	0.0285	CCR5,GJA1,IGFBP2,PIM3,SERPINB1
						0.128		-0.069	0.296	0.0291	DDX25,DNAJC1,FGFR3,NOTCH1,PDPK1,PLP1
						1.226		0.138	0.92	0.0302	ATP1A2,CD320,G6PC3,GALNT10,SLC7A11
										0.0304	FNBP1,GNAS,PLD1
										0.0304	MTHFD2,PCK2,PSAT1
										0.0304	CLU,NFKBIA,THRSP
						0.943		-0.077	1.097	0.0306	CYP51A1,HMGCS1,IDI1,Scd2
						2.138		0.006	2.117	0.0314	ARHGEF10,CCP110,CYTH1,EDNRB,FAM214B,FCHO1,GPSM2,GSTO1,L3MBTL1,NFKBIA,NGFR,PPM1E,PPP2R2A,SLC7A11,ZBTB1
										0.0326	ACSL6,Cdkn1c,EID1,GJA1,MID1IP1,ODC1,RGCC,Scd2,THRSP
						2.752		0.048	2.62	0.0327	CYP51A1,HMGCS1,MSMO1,MVD,NFKBIA,SLC6A9,SLC7A11,SLC8A1
										0.0327	GJA1,TCF12
										0.0327	PCK2,PSAT1
										0.0327	COL15A1,COL6A3
										0.0327	CCR5,GNAS
										0.0327	CHGA,NOTCH1
										0.0327	CLDN11,KDM4A
						0.354		-0.062	0.563	0.0328	CACNA1G,COL2A1,FZD1,GLI1,MITF,NGFR,OLIG1,PLD1,PMP22,SERPINB1,SPRY1,ZIC1
						0		-0.006	0.012	0.0328	GSTM2,IGFBP2,QKI,ST3GAL4
										0.0333	ALDOC,APOE,ATL2,ATP8A1,COL6A3,CYP51A1,DHCR7,EDNRB,ENO3,GLUL,GRIN2D,GRM3,HMGCS1,HUNK,MCAM,MOBP,Mt3,NGFR,P2RX7,PITPNM1,POLR2A,PPP2R2A,PRKCD,Scd2,SLC1A2,THRSP,VSNL1
						1		0.064	0.808	0.0337	APOE,ARSB,ATP1B3,CTSC,DHCR7,GNAS,KLK6,PPL,S1PR1
						1.342		-0.038	1.426	0.0351	ALDOC,ENO3,PCK2,PHKG1,PYGM,Scd2
						-1.387		-0.131	-0.915	0.0368	ALDOC,CCR5,CKAP4,CTSC,EPS8,GPAM,IDI1,KIAA1147,MTDH,PMP22,PSAT1,Scd2,SLAIN1
										0.0368	ATP1A2,HSD11B1,KLF15
										0.0368	CBS/CBSL,GLI1,OLIG2
										0.0368	Cdkn1c,MITF,PPP2R2A
										0.0368	ENPP6,HIPK3,VSNL1
										0.0368	DHCR7,GPAM,Scd2
						0.555		0.017	0.517	0.0383	Cdkn1c,EEF1D,FGFR3,G6PC3,HOMER2,NFAT5,NGFR,NOTCH1,PTPN3
										0.0384	ALDOC,ASPA,GPAM,RPS24,ST3GAL4,WDFY1
										0.0386	COL2A1,GLI1
										0.0386	ADCY6,MITF
						-0.164		-0.038	-0.057	0.039	CTSC,DHCR7,HS3ST1,IDI1,Mt3,MVD,NFYC,XPA
										0.0395	ATP1B2,Mt3,NDRG2,PHKG1,PPP1R14C,PPP1R3C,PYGM,SERPINB1,WBSCR17
						-0.469		-0.094	-0.19	0.0395	CHGA,GJA1,GLI1,GSTP1,IGFBP2,IL33,MCAM,MITF,MTHFD2,NFKBIA,NOTCH1,PLA2G4A,SEMA6D
						-1.723		-0.054	-1.525	0.0404	Acot1,ATP1A2,FADS1,FADS2,GSTP1,HMGCS1,IGFBP2,ODC1,PRKCQ,RPS14,Scd2,THRSP,UGT8,ZNF106
						-0.152		-0.096	0.037	0.0419	FADS1,FADS2,GPAM,NFKBIA,PLIN4,THRSP
						0.447		-0.042	0.542	0.042	Cdkn1c,CHI3L1,CSF2RA,GPAM,JAM3,PRKCQ,RGCC,SLC24A3,UNC5B
						-1.745		0.017	-1.798	0.0427	APOE,CYP51A1,DHCR7,GJA1,GPAM,HMGCS1,IDI1,MSMO1,MVD,SLC25A51
						1.723		-0.013	1.768	0.0436	Acot1,ACSL6,ATP10B,CIB2,COL15A1,FADS2,FGGY,GPAM,HIPK3,HUNK,NFKBIA,PLIN4,QKI,RASD1,THRSP,TST
						1.342		0.083	1.157	0.0437	CA2,FGFR2,NDRG2,NFKBIA,THRSP,TTYH1
						0.102		0.138	-0.332	0.0439	ANLN,GPAM,IPO4,LAMTOR3,OGT,PISD,PNP,PRIM1,PSAT1,RAB30
										0.0439	ADAMTSL1,ATP1A2,MITF
										0.0439	FGFR2,FGFR3,FYN
										0.0439	HMGCS1,IDI1,MSMO1
										0.0448	ARRDC3,CLU
										0.0448	GLI1,HHIP
										0.0448	DHCR7,IDI1
										0.0448	COL2A1,FGFR3
										0.0448	PLIN4,THRSP
										0.0448	GSTO1,IGFBP2
										0.0454	CLU,EEF1D,NFKBIA,PCK2
						-0.788		-0.088	-0.541	0.046	CA2,DHCR7,FGFR2,FOXRED1,HOMER2,NDRG2,NOTCH1,SOX8,SPARCL1
						-0.191		-0.046	-0.04	0.0493	ADRA2A,CHGA,CLU,COL2A1,CREB3,CTSC,FZD1,GJA1,MCAM,MSMO1,NFKBIA,NOTCH1,PAFAH1B3,PDPK1,PLA2G4A,PRKCD,RPL39,RPS10,SERPIND1,SESN3,TAP2,VCAN
						-2.38		-0.011	-2.354	0.0555	APOE,GPAM,HSD11B1,MID1IP1,NFKBIA,RPS14
						2.027		-0.061	2.387	0.0606	ABLIM3,Acot1,ADRA2A,ALDH1L1,CABP7,CCR5,CHST3,CTSC,DDR2,DDX5,EDNRB,ENTPD2,FGF12,FZD1,GJA1,GLUL,GNAS,GPRC5B,HMGCS1,IDI1,MITF,NFE2L3,NFKBIA,NOTCH1,ODC1,PIM3,PLA2G7,PLD1,PRKCD,PRKCQ,PSMB10,S1PR3,SCLY,SLC1A2,SLC46A1,SLC7A11,SLC8A1,TAP2,TRAF6,TRIL,UNC5B,VSNL1,ZNF638
						2.213		0.011	2.189	0.0688	FADS1,FADS2,IDI1,NFKBIA,Scd2
						1.759		-0.02	1.807	0.0892	CBS/CBSL,DESI1,EPS8,IDI1,ODC1,PCK2,PDE8A,Scd2,SPRY1,SRSF6
						-1.948		-0.002	-1.944	0.09	APOE,HSD11B1,LRP8,NFKBIA,RPS14
						-1.912		-0.126	-1.581	0.0935	ALDOC,CSAD,CYP51A1,HMGCS1,IDI1,PCK2,PRKCD,Scd2
						1.89		0.138	1.526	0.103	CARHSP1,FADS2,IPO4,KCNJ16,PRIM1,RHOG,UGT8
						2		-0.003	2.006	0.114	GSTP1,Gstt1,HMGCS1,MSMO1
						-2.601		-0.079	-2.395	0.138	CAPN5,CLU,COL2A1,NFKBIA,PCK2,SESN2,THRSP
						-1.941		-0.043	-1.786	0.181	ABCF3,Acot1,ALDH1L1,AP3B1,APOE,CBS/CBSL,CCP110,CDC42EP2,Cdkn1c,CHI3L1,CYP51A1,DDX25,DISP2,EID1,ETNK2,FOXRED1,FZD1,GRIN2D,GSTO1,HIST1H2BD,HIST1H2BF,HSD11B1,HUNK,ITIH3,KLC4,KLF15,LARS2,MID1IP1,MKRN1,Mt3,NBAS,NBEA,NEK4,NFE2L3,OTUD7B,PCK2,PDE4DIP,PLA2G4A,PNP,POC1A,POLR2A,PPL,PPP1R3C,PRMT7,PSAT1,RAB30,RITA1,RPS6KA1,SESN2,SLC25A18,SLC26A11,TBC1D23,TCF12,TMC6,TMEM161A,TMEM63A,TPRKB,TRAF6,XPA,ZFP64,ZIC2
						-2.201		0.133	-2.494	0.207	COL15A1,COL6A3,IGFBP2,LAMA2,NFKBIA
						-1.969		-0.04	-1.891	0.221	APOE,COTL1,DHCR7,HMGCS1,MVD
						1.86		-0.084	2.068	0.254	COL2A1,FGFR2,FZD1,NFAT5,NFYC,NOTCH1,VCAN
						-1.982		-0.083	-1.819	0.272	GSTP1,NGFR,TONSL,USE1
						-2.377		-0.091	-2.108	0.297	CLU,CST3,HIPK3,ODC1,PIM3,RASD1,REC8,RHOG,TUBA1B
						-1.89		-0.138	-1.526	0.303	APOE,FNBP1,GLI1,GLUL,ITIH3,LAMA2,PLP1
						2.449		-0.004	2.459	0.32	FGFR2,KLF15,NFKBIA,RGCC,SLC9A3R1,SPRY1,UGT8
						1.966		-0.026	2.016	0.322	ADCYAP1R1,CBS/CBSL,CST3,IGFBP2,OGT
						-1.89		-0.132	-1.539	0.329	APOE,FNBP1,GLI1,GLUL,ITIH3,LAMA2,PLP1
						-2.425		-0.093	-2.2	0.348	COL6A3,CYP51A1,DDR2,DHCR7,HMGCS1,IDI1,MSMO1,MVD,PRIM1,PRKCQ,TNNI1
						-2		-0.138	-1.725	0.369	CCR5,Cdkn1c,EDNRB,FGF12,MMP15
						-3.057		-0.08	-2.813	0.371	CA2,COL2A1,CTNNBIP1,EIF3I,EYA4,FGFR2,FGFR3,NFKBIA,OGT,PPP1R26,PSAT1,QKI,SERTAD2,TAP2
						-1.794		-0.086	-1.492	0.408	CCR5,CLU,CST3,CYP51A1,DHCR7,EID1,FOXO4,GLI1,MCAM,MITF,MSMO1,ODC1,SLC7A11
						2.236		0.133	1.94	0.427	EIF3I,GNAS,ODC1,RPL39,RPS10
						1.89		-0.122	2.212	0.432	ANLN,CACNA1E,COTL1,FADS2,GPT2,NFKBIA,PHIP
						-2.333		-0.004	-2.32	0.435	CA2,CBS/CBSL,EDNRB,GSTM2,NDRG2,PMP22,S1PR1,SLC7A11,TAP2
						-2.135		-0.085	-1.851	0.439	CLU,DDX5,GJA1,GSTP1,HMGCS1,IDI1,IGFBP2,NOTCH1,ODC1,RPS6KA1,Scd2,SLC1A2,ST3GAL4,VCAN
						-2.592		-0.075	-2.398	0.525	COL2A1,FGFR2,IL33,MCAM,NFKBIA,NGFR,ODC1
						2		-0.062	2.124	0.535	COL6A3,ENO3,IDI1,NOTCH1,PHKG1,PYGM
						-1.8		-0.069	-1.595	1	EDNRB,GJA1,GSTP1,HMGCS1,IDI1,LATS2,MSMO1,PPP1R3C,SLC8A1
						1.982		-0.06	2.102	1	Acot1,FGFR2,FOXO4,GLUL,MTHFD2,NFKBIA
						2		0.026	1.947	1	GPT2,MAL,S1PR1,TAOK1
						2		-0.085	2.17	1	Acot1,PNP,RNF144A,THSD1
						2.779		-0.102	3.061	1	NFKBIA,NOTCH1,PCK2,PIM3,PRKCD,PRKCQ,SLC46A1,TAP2,TRAF6,VPS54
						-1.98		-0.002	-1.976	1	CLU,NFKBIA,SLC1A2,SLC9A3R1
Causal Networks for My Projects->SCA3->Brain - 2017-02-25 11:24 AM
Diseases and Bio Functions for My Projects->SCA3->Brain - 2017-02-25 11:24 AM
Categories	Diseases or Functions Annotation	p-Value	Predicted Activation State	Activation z-score		Notes	Bias-corrected z-score	Molecules	# Molecules
Cancer, Organismal Injury and Abnormalities	neoplasia of epithelial tissue	5.84e-18		1.204			1.158	KIF13B,SLC6A9,ABCG4,RPL39,PAQR7,ZNF878,GPSM2,TSPAN15,CYTH1,JARID2,ADAMTS16,NWD1,SON,KIAA1147,PTPN3,FAM57A,RPS6KA1,VPS54,SERPINB1,PIM3,ARPC1B,ATP10B,COL15A1,ARRDC3,KDM6A,OTUD7B,MTSS1L,PPM1M,UTP20,DIP2A,FAM155A,GPAM,CBS/CBSL,KLHDC7A,ATP13A4,FOXO4,TRIM56,IDI1,NDRG2,RGCC,RNF7,TRPC3,DDX5,KCNA6,SESN3,ARRDC2,IGFBP2,KIAA0907,ADRA2A,JAM3,TBKBP1,SLC25A10,TNS1,SLC13A5,IQCB1,TTPA,DHCR7,SH3PXD2B,NFAT5,ZFC3H1,…	469
Cancer, Organismal Injury and Abnormalities	epithelial cancer	8.12e-18		0.483			0.452	KIF13B,SLC6A9,ABCG4,RPL39,PAQR7,ZNF878,GPSM2,TSPAN15,CYTH1,JARID2,ADAMTS16,NWD1,SON,KIAA1147,PTPN3,RPS6KA1,VPS54,SERPINB1,PIM3,ARPC1B,ATP10B,COL15A1,ARRDC3,KDM6A,OTUD7B,MTSS1L,PPM1M,UTP20,DIP2A,FAM155A,GPAM,CBS/CBSL,KLHDC7A,ATP13A4,FOXO4,TRIM56,IDI1,NDRG2,RGCC,RNF7,TRPC3,DDX5,KCNA6,SESN3,ARRDC2,IGFBP2,KIAA0907,ADRA2A,JAM3,TBKBP1,SLC25A10,TNS1,SLC13A5,IQCB1,TTPA,DHCR7,SH3PXD2B,NFAT5,ZFC3H1,TPRG1L,…	467
Cancer, Organismal Injury and Abnormalities	tumorigenesis of tissue	2.06e-17		1.6			1.57	KIF13B,SLC6A9,ABCG4,RPL39,PAQR7,ZNF878,GPSM2,TSPAN15,CYTH1,JARID2,ADAMTS16,NWD1,SON,KIAA1147,PTPN3,FAM57A,RPS6KA1,VPS54,SERPINB1,PIM3,ARPC1B,ATP10B,COL15A1,ARRDC3,KDM6A,OTUD7B,MTSS1L,PPM1M,UTP20,DIP2A,FAM155A,GPAM,CBS/CBSL,KLHDC7A,ATP13A4,FOXO4,TRIM56,IDI1,NDRG2,RGCC,RNF7,TRPC3,DDX5,KCNA6,SESN3,ARRDC2,IGFBP2,KIAA0907,ADRA2A,JAM3,TBKBP1,SLC25A10,TNS1,SLC13A5,IQCB1,TTPA,DHCR7,SH3PXD2B,NFAT5,ZFC3H1,…	471
Cancer, Organismal Injury and Abnormalities	adenocarcinoma	2.07e-17						KIF13B,SLC6A9,ABCG4,RPL39,PAQR7,ZNF878,GPSM2,CYTH1,JARID2,ADAMTS16,NWD1,SON,KIAA1147,PTPN3,RPS6KA1,VPS54,SERPINB1,PIM3,ARPC1B,ATP10B,COL15A1,ARRDC3,KDM6A,OTUD7B,MTSS1L,PPM1M,UTP20,DIP2A,FAM155A,GPAM,CBS/CBSL,KLHDC7A,ATP13A4,FOXO4,TRIM56,RGCC,RNF7,TRPC3,DDX5,KCNA6,SESN3,IGFBP2,ARRDC2,KIAA0907,ADRA2A,JAM3,TBKBP1,SLC25A10,TNS1,SLC13A5,IQCB1,TTPA,DHCR7,SH3PXD2B,NFAT5,ZFC3H1,TPRG1L,PYGB,ZBTB1,SCLY,WAS…	429
Cancer, Organismal Injury and Abnormalities	non-melanoma solid tumor	2.12e-17		1.517			1.484	KIF13B,SLC6A9,ABCG4,RPL39,PAQR7,ZNF878,GPSM2,TSPAN15,CYTH1,JARID2,ADAMTS16,NWD1,SON,KIAA1147,PTPN3,FAM57A,RPS6KA1,VPS54,SERPINB1,PIM3,ARPC1B,ATP10B,COL15A1,ARRDC3,KDM6A,OTUD7B,MTSS1L,PPM1M,UTP20,DIP2A,FAM155A,GPAM,CBS/CBSL,KLHDC7A,ATP13A4,FOXO4,TRIM56,IDI1,NDRG2,RGCC,RNF7,TRPC3,DDX5,KCNA6,SESN3,ARRDC2,IGFBP2,KIAA0907,ADRA2A,JAM3,TBKBP1,SLC25A10,TNS1,SLC13A5,IQCB1,TTPA,DHCR7,SH3PXD2B,NFAT5,ZFC3H1,…	474
Cancer, Organismal Injury and Abnormalities	malignant solid tumor	1.81e-16		0.504			0.483	KIF13B,SLC6A9,ABCG4,RPL39,PAQR7,ZNF878,GPSM2,TSPAN15,SAMD12,CYTH1,JARID2,ADAMTS16,NWD1,SON,KIAA1147,PTPN3,RPS6KA1,VPS54,SERPINB1,PIM3,ARPC1B,ATP10B,COL15A1,ARRDC3,KDM6A,OTUD7B,MTSS1L,PPM1M,UTP20,DIP2A,FAM155A,GPAM,CBS/CBSL,KLHDC7A,ATP13A4,FOXO4,TRIM56,IDI1,NDRG2,RGCC,RNF7,TRPC3,DDX5,KCNA6,SESN3,ARRDC2,IGFBP2,KIAA0907,ADRA2A,JAM3,TBKBP1,SLC25A10,TNS1,SLC13A5,IQCB1,TTPA,DHCR7,SH3PXD2B,NFAT5,ZFC3H1,…	497
Cancer, Gastrointestinal Disease, Organismal Injury and Abnormalities	large intestine carcinoma	3.23e-16						KIF13B,TMEM59L,PPP1R26,SLC6A9,COL9A3,ZNF878,GPSM2,FAM208B,ODC1,PEX5L,CYTH1,KEAP1,ABLIM3,JARID2,PLEKHO2,HS3ST1,KCTD3,ADAMTS16,GNG12,PROB1,NWD1,PHIP,PRKCQ,ARSG,MAD2L2,FGFR2,PTPN3,GPT2,LGI4,PLD1,GRM7,SLC7A10,TMPRSS5,ARPC1A,MRNIP,ABCF3,NEK4,FADS2,RPS6KA1,SERPINB1,PIM3,PLXNA3,ARPC1B,CTHRC1,CKAP4,DDX17,ATP10B,COL15A1,G6PC3,OGT,GPRC5B,ARRDC3,CHDH,POFUT2,KDM6A,NGFR,CTBP2,CYP51A1,QDPR,MTSS1L,PLIN4,SERTAD2…	360
Cancer, Organismal Injury and Abnormalities	abdominal cancer	4.97e-16		0.726			0.685	KIF13B,SLC6A9,ABCG4,RPL39,PAQR7,ZNF878,GPSM2,CYTH1,JARID2,ADAMTS16,NWD1,SON,KIAA1147,PTPN3,RPS6KA1,VPS54,SERPINB1,PIM3,ARPC1B,ATP10B,COL15A1,ARRDC3,KDM6A,OTUD7B,MTSS1L,PPM1M,UTP20,DIP2A,FAM155A,GPAM,CBS/CBSL,KLHDC7A,ATP13A4,FOXO4,TRIM56,IDI1,NDRG2,RGCC,RNF7,TRPC3,DDX5,KCNA6,SESN3,ARRDC2,IGFBP2,KIAA0907,ADRA2A,JAM3,TBKBP1,SLC25A10,TNS1,SLC13A5,IQCB1,TTPA,DHCR7,SH3PXD2B,NFAT5,ZFC3H1,TPRG1L,IPO4,Scd…	460
Cancer, Organismal Injury and Abnormalities	cancer	5.94e-16		1.491			1.489	KIF13B,SLC6A9,ABCG4,RPL39,PAQR7,ZNF878,GPSM2,TSPAN15,SAMD12,CYTH1,JARID2,ADAMTS16,NWD1,SON,KIAA1147,MSMO1,PTPN3,RPS6KA1,VPS54,SERPINB1,PIM3,ARPC1B,ATP10B,COL15A1,ARRDC3,KDM6A,OTUD7B,MTSS1L,PPM1M,UTP20,DIP2A,FAM155A,GPAM,CBS/CBSL,KLHDC7A,ATP13A4,FOXO4,TRIM56,IDI1,NDRG2,RGCC,RNF7,TRPC3,DDX5,KCNA6,SESN3,ARRDC2,IGFBP2,KIAA0907,ADRA2A,JAM3,TBKBP1,SLC25A10,TNS1,SLC13A5,IQCB1,TTPA,DHCR7,SH3PXD2B,NFAT5,Z…	499
Cancer, Organismal Injury and Abnormalities	abdominal neoplasm	8.46e-16		0.358			0.286	KIF13B,SLC6A9,ABCG4,RPL39,PAQR7,ZNF878,GPSM2,CYTH1,JARID2,ADAMTS16,NWD1,SON,KIAA1147,PTPN3,RPS6KA1,VPS54,SERPINB1,PIM3,ARPC1B,ATP10B,COL15A1,ARRDC3,KDM6A,OTUD7B,MTSS1L,PPM1M,UTP20,DIP2A,FAM155A,GPAM,CBS/CBSL,KLHDC7A,ATP13A4,FOXO4,TRIM56,IDI1,NDRG2,RGCC,RNF7,TRPC3,DDX5,KCNA6,SESN3,ARRDC2,IGFBP2,KIAA0907,ADRA2A,JAM3,TBKBP1,SLC25A10,TNS1,SLC13A5,IQCB1,TTPA,DHCR7,SH3PXD2B,NFAT5,ZFC3H1,TPRG1L,IPO4,Scd…	463
Cancer, Gastrointestinal Disease, Organismal Injury and Abnormalities	gastrointestinal carcinoma	1.07e-15						KIF13B,TMEM59L,PPP1R26,SLC6A9,COL9A3,ZNF878,GPSM2,FAM208B,ODC1,PEX5L,CYTH1,KEAP1,ABLIM3,JARID2,PLEKHO2,HS3ST1,KCTD3,ADAMTS16,GNG12,PROB1,NWD1,PHIP,PRKCQ,ARSG,MAD2L2,FGFR2,PTPN3,GPT2,LGI4,PLD1,GRM7,SLC7A10,TMPRSS5,ARPC1A,MRNIP,ABCF3,NEK4,FADS2,RPS6KA1,VPS54,APOE,SERPINB1,PIM3,PLXNA3,ARPC1B,CTHRC1,CKAP4,DDX17,ATP10B,COL15A1,G6PC3,OGT,GPRC5B,ARRDC3,CHDH,POFUT2,KDM6A,NGFR,CTBP2,CYP51A1,QDPR,MTSS1L,PL…	374
Cancer, Gastrointestinal Disease, Organismal Injury and Abnormalities	large intestine adenocarcinoma	1.77e-15						KIF13B,TMEM59L,PPP1R26,SLC6A9,COL9A3,ZNF878,GPSM2,FAM208B,PEX5L,CYTH1,KEAP1,ABLIM3,JARID2,PLEKHO2,HS3ST1,KCTD3,ADAMTS16,GNG12,PROB1,NWD1,PHIP,PRKCQ,ARSG,MAD2L2,FGFR2,PTPN3,GPT2,LGI4,PLD1,GRM7,SLC7A10,TMPRSS5,ARPC1A,MRNIP,ABCF3,NEK4,FADS2,RPS6KA1,SERPINB1,PIM3,PLXNA3,ARPC1B,CTHRC1,CKAP4,DDX17,ATP10B,COL15A1,G6PC3,OGT,GPRC5B,ARRDC3,CHDH,POFUT2,KDM6A,NGFR,CTBP2,CYP51A1,QDPR,MTSS1L,PLIN4,SERTAD2,PPM1…	355
Cancer, Gastrointestinal Disease, Organismal Injury and Abnormalities	Gastrointestinal Tract Cancer and Tumors	1.81e-13		0.665			0.574	KIF13B,TMEM59L,PPP1R26,SLC6A9,COL9A3,ZNF878,GPSM2,FAM208B,ODC1,PEX5L,CYTH1,KEAP1,ABLIM3,JARID2,PLEKHO2,HS3ST1,KCTD3,ADAMTS16,GNG12,PROB1,NWD1,PHIP,PRKCQ,ARSG,MAD2L2,FGFR2,PTPN3,GPT2,LGI4,PLD1,GRM7,SLC7A10,TMPRSS5,ARPC1A,MRNIP,ABCF3,NEK4,FADS2,RPS6KA1,VPS54,APOE,SERPINB1,PIM3,PLXNA3,ARPC1B,CTHRC1,CKAP4,DDX17,ATP10B,COL15A1,G6PC3,OGT,GPRC5B,ARRDC3,CHDH,POFUT2,KDM6A,NGFR,CTBP2,CYP51A1,QDPR,MTSS1L,PL…	386
Cancer, Gastrointestinal Disease, Organismal Injury and Abnormalities	gastrointestinal tract cancer	1.89e-13						KIF13B,TMEM59L,PPP1R26,SLC6A9,COL9A3,ZNF878,GPSM2,FAM208B,ODC1,PEX5L,CYTH1,KEAP1,ABLIM3,JARID2,PLEKHO2,HS3ST1,KCTD3,ADAMTS16,GNG12,PROB1,NWD1,PHIP,PRKCQ,ARSG,MAD2L2,FGFR2,PTPN3,GPT2,LGI4,PLD1,GRM7,SLC7A10,TMPRSS5,ARPC1A,MRNIP,ABCF3,NEK4,FADS2,RPS6KA1,VPS54,APOE,SERPINB1,PIM3,PLXNA3,ARPC1B,CTHRC1,CKAP4,DDX17,ATP10B,COL15A1,G6PC3,OGT,GPRC5B,ARRDC3,CHDH,POFUT2,KDM6A,NGFR,CTBP2,CYP51A1,QDPR,MTSS1L,PL…	382
Cancer, Gastrointestinal Disease, Organismal Injury and Abnormalities	malignant neoplasm of large intestine	5.86e-13						KIF13B,TMEM59L,PPP1R26,SLC6A9,COL9A3,ZNF878,GPSM2,FAM208B,ODC1,PEX5L,CYTH1,KEAP1,ABLIM3,JARID2,PLEKHO2,HS3ST1,KCTD3,ADAMTS16,GNG12,PROB1,NWD1,PHIP,PRKCQ,ARSG,MAD2L2,FGFR2,PTPN3,GPT2,LGI4,PLD1,GRM7,SLC7A10,TMPRSS5,ARPC1A,MRNIP,ABCF3,NEK4,FADS2,RPS6KA1,SERPINB1,PIM3,PLXNA3,ARPC1B,CTHRC1,CKAP4,DDX17,ATP10B,COL15A1,G6PC3,OGT,GPRC5B,ARRDC3,CHDH,POFUT2,KDM6A,NGFR,CTBP2,CYP51A1,QDPR,MTSS1L,PLIN4,SERTAD2…	366
Cancer, Gastrointestinal Disease, Organismal Injury and Abnormalities	digestive organ tumor	6.62e-13		1.291			1.204	KIF13B,SLC6A9,ABCG4,ZNF878,GPSM2,CYTH1,JARID2,ADAMTS16,NWD1,SON,PTPN3,RPS6KA1,VPS54,SERPINB1,PIM3,ARPC1B,ATP10B,COL15A1,ARRDC3,KDM6A,MTSS1L,PPM1M,UTP20,DIP2A,FAM155A,GPAM,CBS/CBSL,KLHDC7A,ATP13A4,FOXO4,TRIM56,IDI1,NDRG2,TRPC3,DDX5,KCNA6,SESN3,IGFBP2,ARRDC2,KIAA0907,ADRA2A,JAM3,TBKBP1,SLC25A10,TNS1,SLC13A5,TTPA,DHCR7,SH3PXD2B,NFAT5,ZFC3H1,IPO4,Scd2,PYGB,ZBTB1,SCLY,CTSC,COL9A2,MAP4K4,CLU,CCR5,CCP11…	433
Cancer, Gastrointestinal Disease, Organismal Injury and Abnormalities	large intestine neoplasm	7.26e-13						KIF13B,TMEM59L,PPP1R26,SLC6A9,COL9A3,ZNF878,GPSM2,FAM208B,ODC1,PEX5L,CYTH1,KEAP1,ABLIM3,JARID2,PLEKHO2,HS3ST1,KCTD3,ADAMTS16,GNG12,PROB1,NWD1,PHIP,PRKCQ,ARSG,MAD2L2,FGFR2,PTPN3,GPT2,LGI4,PLD1,GRM7,SLC7A10,TMPRSS5,ARPC1A,MRNIP,ABCF3,NEK4,FADS2,RPS6KA1,SERPINB1,PIM3,PLXNA3,ARPC1B,CTHRC1,CKAP4,DDX17,ATP10B,COL15A1,G6PC3,OGT,GPRC5B,ARRDC3,CHDH,POFUT2,KDM6A,NGFR,CTBP2,CYP51A1,QDPR,MTSS1L,PLIN4,SERTAD2…	367
Cancer, Gastrointestinal Disease, Organismal Injury and Abnormalities	digestive system cancer	7.5e-13	Increased	2.213			2.17	KIF13B,SLC6A9,ABCG4,ZNF878,GPSM2,CYTH1,JARID2,ADAMTS16,NWD1,SON,PTPN3,RPS6KA1,VPS54,SERPINB1,PIM3,ARPC1B,ATP10B,COL15A1,ARRDC3,KDM6A,MTSS1L,PPM1M,UTP20,DIP2A,FAM155A,GPAM,CBS/CBSL,KLHDC7A,ATP13A4,FOXO4,TRIM56,IDI1,NDRG2,TRPC3,DDX5,KCNA6,SESN3,IGFBP2,ARRDC2,KIAA0907,ADRA2A,JAM3,TBKBP1,SLC25A10,TNS1,SLC13A5,TTPA,DHCR7,SH3PXD2B,NFAT5,ZFC3H1,IPO4,Scd2,PYGB,ZBTB1,SCLY,CTSC,COL9A2,MAP4K4,CLU,CCR5,CCP11…	429
Nervous System Development and Function	development of central nervous system	4.02e-11		0.063			0.376	PLP1,QKI,PDPK1,DSCAML1,CTNNBIP1,FGFR3,ABR,OLIG2,JARID2,GALNS,ZIC4,OLIG1,Cdkn1c,MFSD2A,ZIC2,LAMA2,COL2A1,TSPAN2,FGFR2,FZD9,ZNF423,ADCYAP1R1,LRP8,SOX8,VSNL1,NOTCH1,GSTP1,FYN,APOE,PLXNA3,RPS6KA3,VCAN,DHCR7,CST3,NGFR,MAL,PITPNM1,CHST3,ROBO2,ARSB,ZNF488,Mt3,ZIC5,WASF2,ZIC1,ATRX,UGT8,PIGA,XPA,ASPA,PLCB4,PMP22,CBS/CBSL,NDE1,S1PR1,SLC1A2,CD82,GLI1	58
Cell Morphology	morphology of cells	7.25e-11						CCR5,CHGA,CCP110,DDX25,EPS8,SLC6A9,KLK6,ODC1,ABR,OLIG2,Cdkn1c,PRKCQ,MITF,ARSG,MAD2L2,FGFR2,TSPAN33,PLS1,PLD1,S1PR3,TRAF6,ST5,ZNF423,FADS2,LRP8,RPS6KA1,SLC8A1,NOTCH1,HSD11B1,PHLPP1,KLF15,SLC4A4,FYN,APOE,CLDN11,PIM3,PSMB10,CTHRC1,SLC26A11,COL15A1,VCAN,OGT,NGFR,MAL,STARD13,PITPNM1,ROBO2,HEXIM1,MAF1,WASF2,PPM1E,SMYD2,GPR37L1,PLA2G4A,FA2H,SEMA4D,CBS/CBSL,COPRS,NDE1,S1PR1,REC8,ST3GAL4,FOXO4,PLP1,PDPK1,…	134
Cellular Development	differentiation of cells	2.68e-09		-0.636			-0.237	CCR5,EPS8,QKI,KLK6,GPSM2,ODC1,LAMTOR3,OLIG2,KEAP1,JARID2,MKRN1,PLXNB3,Cdkn1c,PRKCQ,MITF,ZIC2,MAD2L2,FGFR2,TSPAN2,TSPAN33,PLD1,S1PR3,TRAF6,GLUL,LRP8,SRSF4,RPS6KA1,LRIG1,NOTCH1,HSD11B1,KLF15,CA2,APOE,SERPINB1,FYN,PIM3,CTHRC1,FZD1,SDC3,VCAN,GPRC5B,CST3,KDM6A,CSF2RA,NGFR,MAL,CTBP2,ROBO2,WASF2,SPRY1,ADCY6,GPR37L1,ASPA,PLA2G4A,FA2H,SEMA4D,CBS/CBSL,COPRS,NDE1,S1PR1,CD82,RPS14,FOXO4,PLP1,SS18,NDRG2,UNC5B…	136
Cancer, Organismal Injury and Abnormalities	abdominal adenocarcinoma	3e-09						KIF13B,PPP1R26,SLC6A9,ABCG4,RPL39,PAQR7,COL9A3,ZNF878,GPSM2,FAM208B,ODC1,PEX5L,KEAP1,ABLIM3,MTHFD2,JARID2,KCTD3,ADAMTS16,GNG12,NWD1,SON,PHIP,PRKCQ,KIAA1147,FGFR2,PTPN3,LGI4,GRM7,SLC7A10,ARPC1A,MRNIP,ABCF3,ANAPC5,HSD11B1,APOE,IQSEC3,SERPINB1,PIM3,PLXNA3,ARPC1B,CTHRC1,CKAP4,DDX17,ATP10B,COL15A1,OGT,GPRC5B,RITA1,ARRDC3,POFUT2,KDM6A,NGFR,CTBP2,QDPR,PLIN4,PPM1E,DIP2A,TMC3,TMEM25,MPP7,INO80D,CDH19,WSCD…	341
Cellular Assembly and Organization, Cellular Function and Maintenance	organization of cytoskeleton	3.24e-09		-0.735			-0.257	CCR5,KIF13B,CCP110,EPS8,ATXN3,SS18,UNC5B,PDPK1,CDC42EP2,PHACTR4,GPSM2,TRPC3,MAST1,RHOG,SEMA3D,ABR,ABLIM3,MID1IP1,GALNS,PLXNB3,EHD1,TTYH1,DLG1,GRID2IP,SON,GJA1,PHIP,PRKCQ,LAMA2,MAD2L2,FGFR2,PREX2,PLS1,PLD1,SLAIN1,S1PR3,TRAF6,IL33,METRN,ARPC1A,ADRA2A,STMN3,PRKCD,ETV4,SSH3,LRP8,VPS54,NOTCH1,FNBP1,APOE,FYN,PLXNA3,EFHD1,RPS6KA3,CKAP4,SDC3,TAOK1,DCDC2,AKAP11,NFKBIA,NGFR,ACAP2,CLMN,PITPNM1,ROBO2,ARSB,SU…	92
Organismal Development, Organismal Injury and Abnormalities	abnormal morphology of head	7.46e-09						EPS8,LATS2,CTNNBIP1,FGFR3,ABR,GALNS,ZIC4,Cdkn1c,EHD1,DLG1,GJA1,MITF,ZIC2,ARSG,COL2A1,FGFR2,FZD9,GDF11,PLS1,FAM20A,S1PR3,TRAF6,ZNF423,SPARCL1,ADRA2A,LRP8,LRIG1,NOTCH1,HSD11B1,SLC4A4,FYN,APOE,CLDN11,RPS6KA3,TTPA,UNC119,DHCR7,SH3PXD2B,DDR2,NGFR,EYA4,ARSB,ROBO2,SULF2,Mt3,CYP51A1,ZIC5,ENHO,GNAS,EDNRB,ZIC1,UGT8,PIGA,XPA,GPR37L1,ASPA,PLCB4,FA2H,CBS/CBSL,NDE1,ENTPD2,ATP1B2,ATP1A2,SLC1A2,DSCAM,POC1A,GLI1	67
Cancer, Organismal Injury and Abnormalities	abdominal carcinoma	1.09e-08						KIF13B,PPP1R26,SLC6A9,ABCG4,RPL39,PAQR7,COL9A3,ZNF878,GPSM2,FAM208B,ODC1,PEX5L,KEAP1,ABLIM3,MTHFD2,JARID2,KCTD3,ADAMTS16,GNG12,NWD1,SON,PHIP,PRKCQ,KIAA1147,FGFR2,PTPN3,LGI4,GRM7,SLC7A10,ARPC1A,MRNIP,ABCF3,ANAPC5,HSD11B1,APOE,IQSEC3,SERPINB1,PIM3,PLXNA3,ARPC1B,CTHRC1,CKAP4,DDX17,ATP10B,COL15A1,OGT,GPRC5B,RITA1,ARRDC3,POFUT2,KDM6A,NGFR,CTBP2,QDPR,PLIN4,PPM1E,DIP2A,TMC3,TMEM25,MPP7,INO80D,CDH19,WSCD…	342
Cellular Assembly and Organization, Cellular Function and Maintenance	organization of cytoplasm	1.24e-08		-0.735			-0.256	CCP110,KIF13B,CCR5,EPS8,ATXN3,SS18,SESN2,UNC5B,PDPK1,CDC42EP2,PHACTR4,GPSM2,TRPC3,MAST1,RHOG,SEMA3D,ABR,ABLIM3,MID1IP1,GALNS,PLXNB3,EHD1,DLG1,TTYH1,GRID2IP,GJA1,PHIP,SON,PRKCQ,LAMA2,MAD2L2,PREX2,FGFR2,PLS1,PLD1,SLAIN1,IL33,METRN,S1PR3,TRAF6,ARPC1A,ADRA2A,STMN3,USE1,PRKCD,ETV4,SSH3,LRP8,NOTCH1,VPS54,RAB30,FNBP1,APOE,FYN,PLXNA3,EFHD1,RPS6KA3,CKAP4,SDC3,TAOK1,DCDC2,AKAP11,NFKBIA,NGFR,ACAP2,CLMN,PITP…	97
Cancer, Organismal Injury and Abnormalities	benign neoplasia	1.53e-08		0.554			0.405	FOXO4,CCR5,PLP1,NDRG2,HIST1H2BD,ENO3,COL9A3,RGCC,RNF7,KLK6,PLA2G7,ODC1,FGFR3,DDX5,RHOG,KEAP1,MTHFD2,ALDOC,NFE2L3,SLC24A3,COL2A1,FGFR2,GDF11,FAM20A,IGFBP2,FAM57A,SPARCL1,ABCA8,ADCYAP1R1,ADRA2A,COL6A3,PRKCD,NPR1,GLUL,LRP8,RPS6KA1,LRIG1,NOTCH1,GSTP1,HSD11B1,SLC4A4,HIST1H1C,APOE,CA2,CLDN11,DDX17,COL15A1,VCAN,SERPIND1,TCF12,PRIM1,KDM6A,DDR2,MCAM,CLMN,ROBO2,PSAT1,GNAS,EDNRB,ATRX,RNF43,PISD,XPA,GSTO1,PL…	70
Cellular Development, Nervous System Development and Function	differentiation of neuroglia	9.21e-08		0.181			0.323	KLF15,PLP1,QKI,TSPAN2,UGT8,DOCK7,GPR37L1,VCAN,ASPA,S1PR3,FGFR3,METRN,OLIG2,S1PR1,GLUL,KDM4A,CD82,SOX8,ZNF488,OLIG1,NOTCH1	21
Organismal Development	morphology of head	1.23e-07						EPS8,LATS2,CTNNBIP1,FGFR3,ABR,GALNS,ZIC4,Cdkn1c,EHD1,DLG1,GJA1,MITF,TKT,ZIC2,ARSG,COL2A1,FGFR2,FZD9,GDF11,PLS1,FAM20A,S1PR3,TRAF6,ZNF423,SPARCL1,ADRA2A,LRP8,LRIG1,NOTCH1,HSD11B1,SLC4A4,FYN,APOE,CLDN11,RPS6KA3,TTPA,UNC119,DHCR7,SH3PXD2B,DDR2,NGFR,EYA4,ARSB,ROBO2,SULF2,Mt3,CYP51A1,ZIC5,ENHO,GNAS,EDNRB,ATRX,ZIC1,UGT8,PIGA,XPA,GPR37L1,ASPA,PLCB4,FA2H,CBS/CBSL,NDE1,ENTPD2,ATP1B2,ATP1A2,SLC1A2,DSCAM,PO…	69
Cellular Development, Cellular Growth and Proliferation, Nervous System Development and Function, Tissue Development	development of neuroglia	1.57e-07		-0.447			-0.291	PLP1,LAMA2,TSPAN2,FGFR2,LGI4,ASPA,FGFR3,NFKBIA,OLIG2,NGFR,ZNF488,NOTCH1,OLIG1,Mt3	14
Cellular Assembly and Organization, Cellular Function and Maintenance	microtubule dynamics	1.7e-07		-1.266			-0.804	CCR5,KIF13B,CCP110,EPS8,ATXN3,SS18,UNC5B,CDC42EP2,TRPC3,RHOG,SEMA3D,ABLIM3,MID1IP1,GALNS,PLXNB3,EHD1,DLG1,TTYH1,SON,GJA1,PRKCQ,LAMA2,FGFR2,PREX2,PLS1,PLD1,SLAIN1,S1PR3,TRAF6,METRN,STMN3,PRKCD,ETV4,LRP8,NOTCH1,FNBP1,APOE,FYN,PLXNA3,EFHD1,RPS6KA3,CKAP4,TAOK1,SDC3,DCDC2,AKAP11,NFKBIA,NGFR,CLMN,PITPNM1,ACAP2,ARSB,ROBO2,SULF2,TRIM67,HAUS8,PDE4DIP,GNAS,WASF2,SLC9A3R1,ATRX,ADCY6,CDC42EP4,UGT8,DOCK7,KIFC…	76
Nervous System Development and Function	morphology of nervous system	1.8e-07						PLP1,PDPK1,LATS2,FGFR3,ABR,OLIG2,GALNS,ZIC4,OLIG1,Cdkn1c,GJA1,PRKCQ,MITF,TKT,LAMA2,ACSL6,ARSG,COL2A1,FGFR2,FZD9,GDF11,ZNF423,SPARCL1,ADCYAP1R1,JAM3,LRP8,NOTCH1,HSD11B1,FYN,APOE,RPS6KA3,TTPA,SDC3,VCAN,UNC119,DHCR7,NFKBIA,NGFR,MAL,ROBO2,SULF2,Mt3,ZIC5,ENHO,GNAS,ATRX,ZIC1,UGT8,DOCK7,XPA,GPR37L1,ASPA,PLCB4,PMP22,FA2H,CBS/CBSL,NDE1,ATP1B2,ATP1A2,S1PR1,SLC1A2,DSCAM,GLI1,PPP1R9A	64
Cancer, Gastrointestinal Disease, Organismal Injury and Abnormalities	colon tumor	2.93e-07						KIF13B,PPP1R26,SLC6A9,ZNF878,FAM208B,GPSM2,ODC1,PEX5L,KEAP1,ABLIM3,JARID2,KCTD3,ADAMTS16,GNG12,NWD1,FGFR2,PTPN3,LGI4,SLC7A10,GRM7,ARPC1A,MRNIP,ABCF3,SERPINB1,PIM3,PLXNA3,CKAP4,DDX17,ATP10B,GPRC5B,POFUT2,KDM6A,CTBP2,QDPR,PLIN4,PPM1E,DIP2A,TMEM25,INO80D,CDH19,FAM155A,PLA2G4A,FGGY,ATP13A4,ENPP6,FOXRED1,FOXO4,KLC4,IDI1,SNX8,CTPS2,PDPK1,ASPG,SRSF6,C8orf44-SGK3/SGK3,TRPC3,DDX5,CACNA1E,GPR4,L3MBTL1,PTBP…	221
Cancer, Gastrointestinal Disease, Organismal Injury and Abnormalities	gastrointestinal adenocarcinoma	3.79e-07						KIF13B,PPP1R26,SLC6A9,COL9A3,ZNF878,GPSM2,FAM208B,PEX5L,KEAP1,ABLIM3,JARID2,KCTD3,ADAMTS16,GNG12,NWD1,FGFR2,PTPN3,LGI4,SLC7A10,GRM7,ARPC1A,MRNIP,ABCF3,FADS2,VPS54,SERPINB1,PIM3,PLXNA3,CTHRC1,CKAP4,DDX17,ATP10B,GPRC5B,POFUT2,KDM6A,NGFR,CTBP2,QDPR,PLIN4,PPM1E,DIP2A,TMEM25,INO80D,CDH19,WSCD1,FAM155A,GPAM,TNS3,FGGY,CBS/CBSL,SLC25A18,ATP13A4,ANKRD13A,ENPP6,FOXRED1,FOXO4,KLC4,SNX8,CTPS2,ASPG,SRSF6,C8or…	239
Nervous System Development and Function, Neurological Disease	abnormal morphology of central nervous system	4.68e-07						APOE,FYN,PLP1,TTPA,LATS2,ABR,NGFR,ROBO2,ZIC4,SULF2,OLIG1,Mt3,ZIC5,ENHO,Cdkn1c,GNAS,ARSG,ZIC1,COL2A1,FGFR2,UGT8,FZD9,XPA,GPR37L1,GDF11,ASPA,ZNF423,SPARCL1,PLCB4,FA2H,CBS/CBSL,NDE1,ATP1B2,ATP1A2,SLC1A2,LRP8,NOTCH1,GLI1,HSD11B1	39
Nervous System Development and Function	morphology of central nervous system	5.75e-07						APOE,FYN,PLP1,SDC3,TTPA,LATS2,DHCR7,ABR,NGFR,ROBO2,ZIC4,SULF2,OLIG1,Mt3,ZIC5,ENHO,Cdkn1c,GNAS,TKT,ATRX,ARSG,ZIC1,COL2A1,FGFR2,UGT8,FZD9,GDF11,XPA,GPR37L1,ASPA,ZNF423,SPARCL1,PLCB4,FA2H,CBS/CBSL,NDE1,ATP1B2,ATP1A2,SLC1A2,DSCAM,LRP8,NOTCH1,GLI1,HSD11B1	44
Cancer, Gastrointestinal Disease, Organismal Injury and Abnormalities	colon carcinoma	7.01e-07						KIF13B,SLC6A9,PPP1R26,ZNF878,FAM208B,PEX5L,KEAP1,ABLIM3,JARID2,KCTD3,ADAMTS16,GNG12,NWD1,FGFR2,PTPN3,LGI4,SLC7A10,GRM7,ARPC1A,MRNIP,ABCF3,SERPINB1,PIM3,PLXNA3,CKAP4,DDX17,ATP10B,GPRC5B,POFUT2,KDM6A,CTBP2,QDPR,PLIN4,PPM1E,DIP2A,TMEM25,INO80D,CDH19,FAM155A,FGGY,ATP13A4,ENPP6,FOXO4,FOXRED1,KLC4,IDI1,SNX8,CTPS2,PDPK1,ASPG,SRSF6,C8orf44-SGK3/SGK3,TRPC3,DDX5,CACNA1E,GPR4,L3MBTL1,PTBP3,KCNA6,EHD1,PLEKHA…	210
Cancer, Gastrointestinal Disease, Organismal Injury and Abnormalities	colon cancer	7.36e-07						KIF13B,PPP1R26,SLC6A9,ZNF878,FAM208B,GPSM2,PEX5L,KEAP1,ABLIM3,JARID2,KCTD3,ADAMTS16,GNG12,NWD1,FGFR2,PTPN3,LGI4,SLC7A10,GRM7,ARPC1A,MRNIP,ABCF3,SERPINB1,PIM3,PLXNA3,CKAP4,DDX17,ATP10B,GPRC5B,POFUT2,KDM6A,CTBP2,QDPR,PLIN4,PPM1E,DIP2A,TMEM25,INO80D,CDH19,FAM155A,FGGY,ATP13A4,ENPP6,FOXO4,FOXRED1,KLC4,IDI1,SNX8,CTPS2,PDPK1,ASPG,SRSF6,C8orf44-SGK3/SGK3,TRPC3,DDX5,CACNA1E,GPR4,L3MBTL1,PTBP3,KCNA6,EHD1,…	218
Organismal Development	size of body	8.18e-07		0.009			0.893	PLP1,SLC6A9,FGFR3,ZIC4,Cdkn1c,EHD1,DLG1,MFSD2A,TKT,LAMA2,COL2A1,MAD2L2,TSPAN2,FGFR2,FZD9,TRAF6,ZNF423,ADCYAP1R1,PRKCD,FADS2,LRP8,HSD11B1,RHBDF1,SLC4A4,HIST1H1C,FYN,APOE,PIM3,Neat1,SLC13A5,RPS6KA3,G6PC3,AKAP11,NFKBIA,POLR2A,SH3PXD2B,DDR2,NGFR,STARD13,EYA4,ARSB,ADCY8,SULF2,ZIC5,MAF1,GNAS,EDNRB,ZIC1,Scd2,UGT8,XPA,ASPA,GPAM,PLA2G4A,PLCB4,CBS/CBSL,TLE4,GLI1,P2RX7	59
Cancer, Gastrointestinal Disease, Organismal Injury and Abnormalities	colorectal carcinoma	1.27e-06						KIF13B,PPP1R26,SLC6A9,ZNF878,FAM208B,GPSM2,ODC1,PEX5L,KEAP1,ABLIM3,JARID2,KCTD3,ADAMTS16,GNG12,NWD1,FGFR2,PTPN3,LGI4,SLC7A10,GRM7,ARPC1A,MRNIP,ABCF3,SERPINB1,PIM3,PLXNA3,CKAP4,DDX17,ATP10B,GPRC5B,POFUT2,KDM6A,CTBP2,QDPR,PLIN4,PPM1E,DIP2A,TMEM25,INO80D,CDH19,FAM155A,FGGY,ATP13A4,ENPP6,FOXO4,FOXRED1,KLC4,IDI1,SNX8,CTPS2,PDPK1,ASPG,SRSF6,C8orf44-SGK3/SGK3,TRPC3,DDX5,CACNA1E,GPR4,L3MBTL1,PTBP3,KCNA6,…	217
Lipid Metabolism, Small Molecule Biochemistry	synthesis of lipid	1.71e-06		0.282			0.671	MVD,FOXO4,DDX25,PLP1,QKI,IDI1,GRM3,ODC1,FGFR3,PEX5L,MID1IP1,MITF,ACSL6,PLD1,IGFBP2,PDE8A,IL33,S1PR3,ABCA8,ETNK2,PRKCD,NPR1,FADS2,HSD11B1,FADS1,FYN,APOE,HOMER2,DHCR7,NFKBIA,NGFR,CTBP2,PITPNM1,CYP51A1,SLC9A3R1,EDNRB,COTL1,Scd2,UGT8,PISD,THRSP,PIGA,ASPA,GPAM,PLA2G4A,FAM213B,S1PR1,CD82,P2RX7,CLU	50
Neurological Disease	Movement Disorders	2.01e-06	Increased	2.064			1.607	TUBA1B,CHGA,PLP1,SLC6A9,ATXN3,NDRG2,ENO3,PDPK1,PAQR6,TRPC3,FGFR3,RHOG,OLIG2,CYTH1,FGF12,ZIC4,CACNA1G,MFSD2A,SLC1A6,GJA1,LAMA2,PTPN3,TRAF6,ZNF423,SPARCL1,ADRA2A,COL6A3,ETV4,LRP8,VSNL1,MTDH,SYNPR,GSTP1,RHBDF1,APOE,CA2,GRIN2D,RASA4,TTPA,VCAN,DHCR7,PPP1R2,NGFR,PITPNM1,CYP51A1,ZIC5,PSAT1,PDE4DIP,GNAS,ZIC1,Scd2,DNAJC1,KCNIP1,UGT8,NBEA,SCLY,XPA,ASPA,GPAM,PIAS3,PLCB4,PMP22,ATP1B2,ATP1A2,S1PR1,SLC1A2,ADAM…	70
Embryonic Development, Organismal Development	development of head	2.27e-06		-0.368			-0.108	PDPK1,DSCAML1,CTNNBIP1,FGFR3,ABR,OLIG2,GALNS,ZIC4,Cdkn1c,DLG1,MFSD2A,GJA1,MITF,TKT,ZIC2,COL2A1,FGFR2,FZD9,HHIP,GDF11,FAM20A,TRAF6,ZNF423,ADCYAP1R1,JAM3,Zfp950,LRP8,SOX8,LRIG1,NOTCH1,SLC4A4,FYN,APOE,PLXNA3,PSMB10,CTHRC1,TTPA,FZD1,UNC119,DHCR7,NFKBIA,SH3PXD2B,CST3,NGFR,CHST3,PITPNM1,ROBO2,ARSB,EYA4,ZIC5,WASF2,ATRX,ZIC1,SMOC1,PIGA,XPA,ASPA,PLCB4,CBS/CBSL,NDE1,ATP1B2,S1PR1,SLC1A2,DSCAM,GLI1	65
Cancer, Gastrointestinal Disease, Organismal Injury and Abnormalities	colorectal adenocarcinoma	2.6e-06						KIF13B,PPP1R26,SLC6A9,ZNF878,FAM208B,GPSM2,PEX5L,KEAP1,ABLIM3,JARID2,KCTD3,ADAMTS16,GNG12,NWD1,FGFR2,PTPN3,LGI4,SLC7A10,GRM7,ARPC1A,MRNIP,ABCF3,SERPINB1,PIM3,PLXNA3,CKAP4,DDX17,ATP10B,GPRC5B,POFUT2,KDM6A,CTBP2,QDPR,PLIN4,PPM1E,DIP2A,TMEM25,INO80D,CDH19,FAM155A,FGGY,ATP13A4,ENPP6,FOXO4,FOXRED1,KLC4,SNX8,CTPS2,ASPG,SRSF6,C8orf44-SGK3/SGK3,TRPC3,DDX5,CACNA1E,L3MBTL1,PTBP3,KCNA6,EHD1,PLEKHA7,SESN3,LA…	211
Cancer, Gastrointestinal Disease, Organismal Injury and Abnormalities	colon adenocarcinoma	3.24e-06						KIF13B,SLC6A9,PPP1R26,ZNF878,FAM208B,PEX5L,KEAP1,ABLIM3,JARID2,KCTD3,ADAMTS16,GNG12,NWD1,FGFR2,PTPN3,LGI4,SLC7A10,GRM7,ARPC1A,MRNIP,ABCF3,SERPINB1,PIM3,PLXNA3,CKAP4,DDX17,ATP10B,GPRC5B,POFUT2,KDM6A,CTBP2,QDPR,PLIN4,PPM1E,DIP2A,TMEM25,INO80D,CDH19,FAM155A,FGGY,ATP13A4,ENPP6,FOXO4,FOXRED1,KLC4,SNX8,CTPS2,ASPG,SRSF6,C8orf44-SGK3/SGK3,TRPC3,DDX5,CACNA1E,L3MBTL1,PTBP3,KCNA6,EHD1,PLEKHA7,SESN3,LAMA2,IG…	204
Cancer, Organismal Injury and Abnormalities	melanoma	4.33e-06		0.438			0.51	KIF13B,SLC6A9,ABCG4,COL9A3,ZNF878,FAM208B,ODC1,SAMD12,PEX5L,KEAP1,ABLIM3,JARID2,PLEKHO2,HS3ST1,KCTD3,ADAMTS16,NWD1,SON,PHIP,PRKCQ,KIAA1147,ARSG,MAD2L2,FGFR2,PTPN3,LGI4,PLD1,GRM7,SLC7A10,ABCF3,NEK4,FADS2,SRSF4,RPS6KA1,HSD11B1,IQSEC3,PIM3,PLXNA3,CKAP4,DDX17,ATP10B,COL15A1,LRCH3,OGT,GPRC5B,ARRDC3,CHDH,POFUT2,KDM6A,NGFR,CTBP2,OTUD7B,CYP51A1,MTSS1L,PLIN4,SPRY1,UTP20,PPM1E,ADCY6,DIP2A,TMC3,CDC42EP4,TME…	321
Cancer, Organismal Injury and Abnormalities	adenoma	4.83e-06		0.05			-0.108	SLC4A4,CA2,HIST1H1C,FOXO4,APOE,HIST1H2BD,ENO3,RGCC,KLK6,DDX17,PLA2G7,COL15A1,VCAN,ODC1,TCF12,FGFR3,DDX5,MCAM,KEAP1,CLMN,ALDOC,NFE2L3,PSAT1,GNAS,ATRX,RNF43,FGFR2,PISD,XPA,IGFBP2,SPARCL1,SEMA4D,ABCA8,GLUL,LRP8,RPS6KA1,LRIG1,GLI1,NOTCH1,CLU,GSTP1,HSD11B1	42
Nervous System Development and Function, Neurological Disease	abnormal morphology of nervous system	5.52e-06						PLP1,PDPK1,LATS2,FGFR3,OLIG2,ABR,ZIC4,OLIG1,Cdkn1c,GJA1,PRKCQ,ARSG,LAMA2,COL2A1,FGFR2,FZD9,GDF11,ZNF423,SPARCL1,LRP8,NOTCH1,HSD11B1,FYN,APOE,RPS6KA3,TTPA,VCAN,UNC119,NGFR,ROBO2,SULF2,Mt3,ZIC5,ENHO,GNAS,ZIC1,UGT8,GPR37L1,XPA,ASPA,PLCB4,PMP22,FA2H,CBS/CBSL,NDE1,ATP1B2,ATP1A2,S1PR1,SLC1A2,DSCAM,GLI1	51
Cancer, Organismal Injury and Abnormalities	breast or colorectal cancer	5.67e-06						KIF13B,PPP1R26,SLC6A9,PAQR7,ZNF878,GPSM2,FAM208B,TSPAN15,ODC1,PEX5L,KEAP1,ABLIM3,JARID2,KCTD3,ADAMTS16,GNG12,ALDOC,NWD1,PRKCQ,FGFR2,PTPN3,LGI4,PLD1,GRM7,SLC7A10,ARPC1A,MRNIP,ABCF3,RPS6KA1,APOE,SERPINB1,PIM3,PLXNA3,CKAP4,DDX17,ATP10B,GPRC5B,POFUT2,KDM6A,NGFR,CTBP2,OTUD7B,QDPR,PLIN4,SERTAD2,PPM1E,C1orf198,DIP2A,TMEM25,INO80D,CDH19,FAM155A,FGGY,TMEM106C,ATP13A4,ENPP6,FOXRED1,FOXO4,IDI1,KLC4,SNX8,CTP…	263
Embryonic Development, Nervous System Development and Function, Organ Development, Organismal Development, Tissue Development	formation of brain	5.7e-06		-1.234			-0.986	FYN,APOE,PLXNA3,PDPK1,DSCAML1,CTNNBIP1,FGFR3,DHCR7,ABR,CST3,OLIG2,CHST3,PITPNM1,GALNS,ROBO2,ZIC4,ZIC5,Cdkn1c,MFSD2A,WASF2,ZIC2,ATRX,ZIC1,COL2A1,FGFR2,FZD9,PIGA,XPA,ZNF423,PLCB4,ADCYAP1R1,CBS/CBSL,NDE1,S1PR1,SLC1A2,LRP8,NOTCH1,GLI1	38
Nervous System Development and Function, Neurological Disease, Organ Morphology, Organismal Development, Organismal Injury and Abnormalities	abnormal morphology of brain	5.74e-06						APOE,FYN,LATS2,ABR,NGFR,ROBO2,ZIC4,SULF2,Mt3,ZIC5,ENHO,Cdkn1c,GNAS,ARSG,ZIC1,COL2A1,FGFR2,UGT8,FZD9,XPA,GPR37L1,ASPA,ZNF423,SPARCL1,PLCB4,FA2H,NDE1,ATP1B2,ATP1A2,SLC1A2,LRP8,NOTCH1,GLI1,HSD11B1	34
Cellular Development, Nervous System Development and Function	differentiation of astrocytes	6.88e-06		-0.161			-0.106	S1PR3,FGFR3,METRN,OLIG2,S1PR1,CD82,KDM4A,NOTCH1,VCAN,GPR37L1	10
Cell Morphology	abnormal morphology of cells	7.37e-06						CCR5,PLP1,DDX25,EPS8,PDPK1,C8orf44-SGK3/SGK3,LATS2,TRPC3,FGFR3,ABR,OLIG2,OLIG1,EHD1,TTYH1,GJA1,PRKCQ,LAMA2,ARSG,MAD2L2,COL2A1,FGFR2,TSPAN33,GDF11,PLS1,FAM20A,S1PR3,TRAF6,ZNF423,TOP1MT,SPARCL1,PRKCD,FADS2,LRP8,SLC8A1,NOTCH1,HSD11B1,RHBDF1,SLC4A4,APOE,FYN,CLDN11,PIM3,PSMB10,Neat1,SLC13A5,RPS6KA3,CTHRC1,COL15A1,VCAN,NFKBIA,NGFR,ARSB,ROBO2,HEXIM1,SULF2,Mt3,ENHO,EDNRB,SLC9A3R1,Scd2,UGT8,PIGA,XPA,GPR37…	79
Nervous System Development and Function	myelination	8.02e-06		0.679			0.782	APOE,DLG1,FYN,PLP1,QKI,LAMA2,TSPAN2,UGT8,DOCK7,LGI4,FGFR3,PMP22,NFKBIA,FA2H,MOBP,JAM3,OLIG2,NGFR,MAL	19
Cell Morphology, Cellular Assembly and Organization, Cellular Function and Maintenance	formation of cellular protrusions	1.04e-05		-1.063			-0.65	CCP110,KIF13B,EPS8,SS18,CDC42EP2,TRPC3,RHOG,SEMA3D,ABLIM3,GALNS,PLXNB3,EHD1,DLG1,TTYH1,GJA1,PRKCQ,PREX2,FGFR2,PLD1,S1PR3,METRN,TRAF6,STMN3,ETV4,LRP8,NOTCH1,FNBP1,FYN,APOE,PLXNA3,EFHD1,RPS6KA3,SDC3,DCDC2,NFKBIA,NGFR,CLMN,ACAP2,ROBO2,SULF2,TRIM67,WASF2,SLC9A3R1,ATRX,CDC42EP4,UGT8,DOCK7,PMP22,SEMA4D,S1PR1,CD82,DSCAM,POC1A,P2RX7,PPP1R9A,CLU	56
Cellular Development, Cellular Growth and Proliferation, Nervous System Development and Function	myelination of cells	1.05e-05						FYN,DLG1,PMP22,NFKBIA,PLP1,QKI,OLIG2,JAM3,NGFR,MAL,TSPAN2,UGT8,LGI4	13
Nervous System Development and Function, Organ Morphology, Organismal Development	morphology of brain	1.06e-05						APOE,FYN,LATS2,DHCR7,ABR,NGFR,ROBO2,ZIC4,SULF2,Mt3,ZIC5,ENHO,Cdkn1c,GNAS,TKT,ATRX,ARSG,ZIC1,COL2A1,FGFR2,UGT8,FZD9,XPA,GPR37L1,ASPA,ZNF423,SPARCL1,PLCB4,FA2H,NDE1,ATP1B2,ATP1A2,SLC1A2,LRP8,DSCAM,NOTCH1,GLI1,HSD11B1	38
Nervous System Development and Function, Neurological Disease, Organ Morphology, Organismal Development, Organismal Injury and Abnormalities	abnormal morphology of cerebellum	1.08e-05						GNAS,ZIC1,ARSG,UGT8,XPA,GPR37L1,ZNF423,PLCB4,SPARCL1,FA2H,ABR,LRP8,ROBO2,ZIC4,ENHO	15
Neurological Disease	gait disturbance	1.17e-05						APOE,PLP1,LAMA2,ZIC1,UGT8,TRPC3,XPA,ASPA,FGFR3,ZNF423,PLCB4,NGFR,LRP8,GLI1,ZIC5	15
Cardiovascular System Development and Function, Organismal Development	angiogenesis	1.19e-05		0.406			0.721	FOXO4,CCR5,CHGA,QKI,UNC5B,RGCC,PDPK1,PLA2G7,TRPC3,ODC1,FGFR3,RHOG,SEMA3D,GPR4,PLXNB3,DLG1,GJA1,TKT,LAMA2,FGFR2,PLD1,S1PR3,TRAF6,ADRA2A,JAM3,PRKCD,NPR1,Zfp950,LRP8,MTDH,SLC8A1,NOTCH1,APOE,VASH2,PIM3,COL15A1,SERPIND1,OGT,DHCR7,NFKBIA,NFAT5,CST3,NGFR,MCAM,CTBP2,STARD13,HEXIM1,CYP51A1,WASF2,EDNRB,FNIP1,PLA2G4A,SEMA4D,CBS/CBSL,S1PR1,CD82,CHI3L1,GLI1,P2RX7	59
Cancer, Organismal Injury and Abnormalities, Reproductive System Disease	mammary tumor	1.34e-05		0.534			0.592	TUBA1B,CCP110,CCR5,EPS8,QKI,NDRG2,PAQR7,PDPK1,KLK6,RNF7,SRSF6,C8orf44-SGK3/SGK3,LATS2,ODC1,TSPAN15,FGFR3,ALDH1L1,DDX5,GSTM2,GPR4,ABR,KEAP1,ALDOC,NFE2L3,GJA1,PRKCQ,ANLN,ZIC2,CREB3,PREX2,FGFR2,PTPN3,IGFBP2,IL33,IGDCC4,TOP1MT,ZNF423,ETNK2,ABCA8,ADRA2A,STMN3,PRKCD,ETV4,NEK4,GLUL,NFYC,RPS6KA1,SLC8A1,MTDH,NOTCH1,TNS1,GSTP1,TTC39A,RHBDF1,APOE,FYN,HIST1H1C,GRIN2D,MMP15,DDX17,FZD1,TAOK1,ANKRD12,VCAN,ARRDC…	98
Auditory Disease, Neurological Disease	hearing loss	1.48e-05		1.969			1.682	APOE,GJA1,HOMER2,SLC7A11,EPS8,EDNRB,SLC9A3R1,MITF,COL2A1,LARS2,GPSM2,DCDC2,FGFR3,CIB2,PMP22,NGFR,WHRN,EYA4,LRIG1,GSTP1	20
Cancer, Organismal Injury and Abnormalities, Reproductive System Disease	female genital tract serous carcinoma	1.66e-05						HIST1H1C,APOE,CA2,PLP1,HIST1H2BD,RGCC,KLK6,COL15A1,VCAN,FGFR3,DDR2,MCAM,KEAP1,MAL,NFE2L3,EDNRB,ATRX,IGFBP2,IL33,SPARCL1,PMP22,ABCA8,CBS/CBSL,JAM3,ETV4,LRP8,LRIG1,NOTCH1,GLI1,CLU,HSD11B1	31
Cellular Assembly and Organization, Cellular Function and Maintenance	organization of actin cytoskeleton	1.69e-05						EPS8,ATXN3,PDPK1,PHACTR4,CDC42EP2,RHOG,ABR,WDR1,STRIP1,DLG1,PHIP,GRID2IP,WASF2,SLC9A3R1,MAD2L2,ARPC1A,ADRA2A,PRKCD,SSH3,S1PR1,CD82,PPP1R9A,FNBP1,CLU,HIP1R	25
Cellular Growth and Proliferation	proliferation of cells	1.69e-05		1.55			1.926	CCR5,CHGA,EPS8,GRM3,KCNJ16,KLK6,ODC1,EEF1D,LAMTOR3,ALDH1L1,OLIG2,KEAP1,JARID2,PLXNB3,Cdkn1c,CACNA1G,SON,PHIP,PRKCQ,MITF,ZIC2,CREB3,MAD2L2,FGFR2,PTPN3,LGI4,PLS1,PLD1,S1PR3,TRAF6,ST5,ZNF423,ANAPC5,FADS2,GLUL,RPS6KA1,LRIG1,SLC8A1,NOTCH1,GSTP1,HSD11B1,PHLPP1,KLF15,APOE,FYN,CLDN11,PIM3,VASH2,PLXNA3,CD320,PSMB10,CTHRC1,DDX17,SDC3,CAMK2N2,COPS9,VCAN,USP3,OGT,ARRDC3,KDM6A,CST3,CSF2RA,NGFR,STARD13,CTBP2,C…	181
Cancer, Endocrine System Disorders, Organismal Injury and Abnormalities, Reproductive System Disease	benign ovarian tumor	1.71e-05						NFE2L3,APOE,HIST1H1C,GNAS,HIST1H2BD,ATRX,RGCC,KLK6,COL15A1,VCAN,IGFBP2,FGFR3,ABCA8,MCAM,KEAP1,LRP8,LRIG1,NOTCH1,GLI1,CLU,HSD11B1	21
Cellular Development, Nervous System Development and Function	differentiation of oligodendrocytes	1.92e-05		1.12			1.243	FGFR3,QKI,OLIG2,TSPAN2,UGT8,SOX8,CD82,ZNF488,OLIG1,NOTCH1,VCAN,ASPA	12
Amino Acid Metabolism, Molecular Transport, Small Molecule Biochemistry	uptake of acidic amino acid	1.93e-05	Decreased	-2.189			-2.028	SLC7A10,SLC1A6,SLC7A11,SLC46A1,SLC1A2,GLUL,MTDH	7
Cell Morphology, Cellular Assembly and Organization, Cellular Development, Cellular Function and Maintenance, Cellular Growth and Proliferation, Nervous System Development and Function, Tissue Development	neuritogenesis	3.41e-05		-1.386			-1.12	APOE,FYN,KIF13B,PLXNA3,EPS8,SS18,EFHD1,RPS6KA3,TRPC3,DCDC2,NFKBIA,RHOG,SEMA3D,NGFR,CLMN,GALNS,ROBO2,SULF2,TRIM67,EHD1,DLG1,GJA1,ATRX,FGFR2,PREX2,UGT8,DOCK7,PLD1,S1PR3,METRN,PMP22,SEMA4D,STMN3,ETV4,LRP8,DSCAM,NOTCH1,P2RX7,CLU,FNBP1,PPP1R9A	41
Lipid Metabolism, Small Molecule Biochemistry	synthesis of arachidonic acid	3.57e-05		-0.218			-0.053	PLA2G4A,FYN,NFKBIA,FADS2,FADS1	5
Cell Morphology	morphology of tumor cell lines	3.79e-05						FYN,MITF,PPM1E,MAD2L2,KLK6,FGFR2,TAOK1,IGFBP2,PLD1,ODC1,CTNNBIP1,FGFR3,NFKBIA,FA2H,ADRA2A,STMN3,PRKCD,ATP1B2,STARD13,CLU,PHLPP1	21
Cell Morphology, Cellular Assembly and Organization, Cellular Development, Cellular Function and Maintenance, Cellular Growth and Proliferation, Nervous System Development and Function, Tissue Development	morphogenesis of neurites	3.94e-05		-1.54			-1.336	APOE,FYN,EPS8,SS18,EFHD1,RPS6KA3,TRPC3,DCDC2,RHOG,SEMA3D,NGFR,CLMN,GALNS,ROBO2,SULF2,EHD1,DLG1,GJA1,ATRX,PREX2,UGT8,DOCK7,PLD1,SEMA4D,STMN3,ETV4,LRP8,DSCAM,NOTCH1,CLU,PPP1R9A,FNBP1	32
Neurological Disease	ataxia	4.06e-05		0.797			0.405	CACNA1G,MFSD2A,SLC1A6,PLP1,GNAS,ATXN3,ZIC1,UGT8,TTPA,TRPC3,XPA,ASPA,ZNF423,PIAS3,PLCB4,ADRA2A,NGFR,PITPNM1,SLC1A2,LRP8,ZIC4,RHBDF1	22
Cancer, Endocrine System Disorders, Gastrointestinal Disease, Organismal Injury and Abnormalities	pancreatic tumor	4.08e-05		1.671			1.679	CHGA,KIF13B,ATP8A1,GRM3,KLK6,DSCAML1,NUDT14,MIF4GD,EMC7,FAM208B,WBSCR17,MAST1,KEAP1,FGF12,ANKRD29,CACNA1G,SON,MITF,SLC24A3,ZIC2,FGFR2,TSPAN2,PTPN3,ZNF423,MYO9A,ANAPC5,PCDHB6,LRP8,LRIG1,SLC8A1,ARHGEF10,NOTCH1,GSTP1,SLC4A4,TBC1D23,IQSEC3,PIM3,DHRSX,ARPC1B,PPP2R2A,CTHRC1,KIAA1161,ANKRD12,SLC26A11,ATP10B,COL15A1,VCAN,AKAP11,RITA1,CHDH,KDM6A,CST3,CSF2RA,NGFR,PITPNM1,ROBO2,STRIP1,PLIN4,PDE4DIP,UTP20,DI…	133
Cancer, Endocrine System Disorders, Organismal Injury and Abnormalities, Reproductive System Disease	serous ovarian carcinoma	4.21e-05						NFE2L3,HIST1H1C,APOE,HIST1H2BD,ATRX,RGCC,KLK6,COL15A1,VCAN,IGFBP2,FGFR3,ABCA8,MCAM,KEAP1,LRP8,LRIG1,NOTCH1,GLI1,CLU,HSD11B1	20
Gastrointestinal Disease, Hepatic System Disease, Organismal Injury and Abnormalities	liver lesion	4.71e-05		0.847			0.742	PPP1R26,ABCG4,FAM208B,GPSM2,ODC1,PEX5L,CYTH1,KEAP1,ABLIM3,JARID2,HS3ST1,ADAMTS16,PHIP,SON,COMTD1,PRKCQ,FGFR2,PTPN3,GPT2,PLD1,SLC7A10,GRM7,ARPC1A,MRNIP,ABCF3,ANAPC5,VPS54,IQSEC3,APOE,CTHRC1,DDX17,ATP10B,LRCH3,OGT,CHDH,KDM6A,NGFR,CYP51A1,MTSS1L,UTP20,TMC3,DIP2A,SMYD2,TMEM25,PDLIM2,CDH19,FAM155A,GPAM,PLA2G4A,TNS3,MOBP,CBS/CBSL,ATP1A2,WRAP53,NDRG2,PDPK1,TRPC3,TST,DDX5,CACNA1E,RHOG,GPR4,NBAS,PLEKHA7,S…	218
Amino Acid Metabolism, Molecular Transport, Small Molecule Biochemistry	uptake of alpha-amino acid	4.95e-05	Decreased	-2.382			-2.17	SLC7A10,SLC1A6,SLC7A11,SLC6A9,SLC1A2,GLUL,MTDH	7
Connective Tissue Disorders, Developmental Disorder, Hereditary Disorder, Organismal Injury and Abnormalities, Skeletal and Muscular Disorders	spondyloepimetaphyseal dysplasia	4.96e-05						DDR2,COL9A3,COL2A1,CHST3,COL9A2	5
Cardiovascular System Development and Function	development of vasculature	5.02e-05		0.406			0.722	FOXO4,CCR5,CHGA,QKI,SS18,UNC5B,RGCC,PDPK1,PLA2G7,TRPC3,ODC1,FGFR3,RHOG,SEMA3D,GPR4,PLXNB3,DLG1,GJA1,TKT,LAMA2,FGFR2,PLD1,S1PR3,TRAF6,EPN2,ADRA2A,JAM3,PRKCD,NPR1,Zfp950,LRP8,MTDH,SLC8A1,NOTCH1,APOE,VASH2,PIM3,MMP15,COL15A1,SERPIND1,OGT,DHCR7,NFKBIA,NFAT5,CST3,MCAM,NGFR,STARD13,CTBP2,HEXIM1,CYP51A1,WASF2,EDNRB,FNIP1,PLA2G4A,SEMA4D,CBS/CBSL,S1PR1,CD82,CHI3L1,GLI1,P2RX7,CLU	63
Cellular Development	branching of cells	5.16e-05		-0.8			-0.556	FYN,APOE,PIM3,EPS8,SS18,UNC5B,RPS6KA3,TRPC3,NFKBIA,RHOG,SEMA3D,NGFR,CTBP2,GALNS,ROBO2,SULF2,DLG1,ATRX,LAMA2,ADCY6,PLD1,S1PR3,TRAF6,SEMA4D,ETV4,DSCAM,NOTCH1,PPP1R9A,FNBP1	29
Cell Death and Survival	cell death	5.61e-05	Increased	2.847			2.643	CCR5,CHGA,CCP110,DDX25,QKI,GRM3,KLK6,MIF4GD,ODC1,EEF1D,ALDH1L1,KEAP1,FGF12,ADAMTS16,ALDOC,Cdkn1c,SFT2D2,CACNA1G,SON,PHIP,PRKCQ,MITF,MAD2L2,FGFR2,TSPAN2,FAM129B,PLS1,PLD1,S1PR3,TRAF6,ZNF423,NEK4,LRP8,RPS6KA1,VSNL1,LRIG1,SLC8A1,TAP2,NOTCH1,GSTP1,PHLPP1,APOE,SERPINB1,HIST1H1C,FYN,PIM3,VASH2,PPP2R2A,PSMB10,DDX17,SDC3,CAMK2N2,SLC26A11,VCAN,G6PC3,OGT,CST3,CSF2RA,NGFR,MAL,CTBP2,HEXIM1,RPS24,ADCY6,DIP2A,…	165
Cardiovascular System Development and Function, Organismal Development	vasculogenesis	5.92e-05		0.321			0.616	APOE,CCR5,CHGA,PIM3,VASH2,QKI,UNC5B,RGCC,TRPC3,PLA2G7,COL15A1,ODC1,SERPIND1,FGFR3,OGT,NFKBIA,RHOG,SEMA3D,CST3,STARD13,CTBP2,HEXIM1,PLXNB3,CYP51A1,DLG1,GJA1,WASF2,EDNRB,TKT,LAMA2,FGFR2,FNIP1,PLD1,S1PR3,TRAF6,PLA2G4A,SEMA4D,ADRA2A,CBS/CBSL,JAM3,PRKCD,S1PR1,Zfp950,CD82,LRP8,SLC8A1,NOTCH1,GLI1	48
Cancer, Cell Cycle, Organismal Injury and Abnormalities	cell cycle progression of melanoma cells	6.37e-05						DDR2,PDPK1,C8orf44-SGK3/SGK3	3
Embryonic Development, Nervous System Development and Function, Organ Development, Organismal Development, Tissue Development	formation of cerebellar folia	6.37e-05						ZIC2,ZIC1,XPA	3
Developmental Disorder	Growth Failure	6.39e-05		-1.126			-1.909	SLC4A4,HIST1H1C,CHGA,PIM3,SS18,MMP15,LATS2,G6PC3,TCF12,FGFR3,DHCR7,NFKBIA,POLR2A,NFAT5,KDM6A,KIF19,DDR2,NGFR,HS3ST1,SULF2,Cdkn1c,MAF1,GNAS,WASF2,EDNRB,TKT,LAMA2,ZIC1,MAD2L2,FGFR2,UGT8,FZD9,XPA,TRAF6,CBS/CBSL,TLE4,SLC1A2,REC8,MAP4K4,NOTCH1	40
Cellular Development	differentiation of central nervous system cells	6.4e-05		0.378			0.55	GPR37L1,VCAN,FGFR3,METRN,S1PR3,OLIG2,NGFR,ETV4,S1PR1,SOX8,CD82,KDM4A,NOTCH1	13
Cancer, Dermatological Diseases and Conditions, Organismal Injury and Abnormalities	papilloma	6.89e-05		0.563			0.525	FGFR3,FAM57A,RHOG,NDRG2,PRKCD,FGFR2,RNF7,XPA,GSTO1,CLU,ODC1,GSTP1,SERPIND1	13
Cellular Movement	cell movement	6.97e-05		-0.33			0.159	CCR5,CHGA,EPS8,ATP8A1,GRM3,KLK6,PHACTR4,ABR,KEAP1,PLXNB3,GNG12,PRKCQ,MITF,TKT,CREB3,MAD2L2,FGFR2,PLD1,S1PR3,TRAF6,PODXL2,MYO9A,LRP8,RPS6KA1,VSNL1,SLC8A1,LRIG1,NOTCH1,SERPINB1,FYN,APOE,CLDN11,VASH2,PLXNA3,ARPC1B,SDC3,VCAN,G6PC3,AKAP11,ARRDC3,CHDH,CST3,CSF2RA,NGFR,STARD13,CTBP2,ROBO2,HEXIM1,PDE4DIP,WASF2,CDC42EP4,PDLIM2,PLA2G4A,TNS3,SEMA4D,CBS/CBSL,NDE1,S1PR1,CD82,ST3GAL4,FOXO4,PLP1,NDRG2,UNC5B,RGC…	113
Lipid Metabolism, Small Molecule Biochemistry	fatty acid metabolism	7e-05		-0.487			-0.114	APOE,FYN,ATP8A1,PLP1,QKI,ABCG4,SLC13A5,FGFR3,NFKBIA,NGFR,PITPNM1,MID1IP1,MFSD2A,EDNRB,SLC9A3R1,MITF,COTL1,PCOLCE2,ACSL6,Scd2,MSMO1,UGT8,PLD1,S1PR3,IL33,PLA2G4A,GPAM,ABCA8,FA2H,FAM213B,PRKCD,S1PR1,FADS2,Acot1,CD82,SLC25A10,P2RX7,CLU,FADS1	39
Nervous System Development and Function, Organ Development	growth of brain	7.04e-05		-1.195			-1.103	FGFR3,ZNF423,GNAS,ADCYAP1R1,CST3,ZIC1,FGFR2,GALNS,GLI1,XPA,CLU,GPR37L1	12
Lipid Metabolism, Small Molecule Biochemistry	metabolism of membrane lipid derivative	7.33e-05		-0.141			0.148	FOXO4,APOE,IDI1,ASPG,PLA2G7,DHCR7,PEX5L,NGFR,CTBP2,PITPNM1,PLCD4,Mt3,CYP51A1,ABHD3,ACSL6,UGT8,PISD,PIGA,PLD1,ASPA,GPAM,PLA2G4A,ABCA8,ETNK2,PRKCD,CD82,P2RX7,FADS1	28
Molecular Transport	transport of molecule	7.45e-05		-1.198			-0.77	CCR5,CHGA,SLC7A11,DDX25,ATP8A1,SFXN5,SLC6A9,SESN2,NDRG2,SNX8,ABCG4,RGCC,PDPK1,C8orf44-SGK3/SGK3,TRPC3,CACNA1E,CYTH1,FGF12,NEDD4L,KCNA6,EHD1,CACNA1G,DLG1,TTYH1,MFSD2A,SLC1A6,PHIP,GJA1,PRKCQ,SLC24A3,ACSL6,PLD1,GRM7,IL33,SLC7A10,ABCA8,ADRA2A,PRKCD,CACNG5,PNP,GLUL,SLC25A10,VSNL1,SLC8A1,MTDH,TAP2,HSD11B1,RHBDF1,KLF15,SLC4A4,CA2,APOE,FYN,SLC46A1,PPP1R3C,SLC13A5,TTPA,SLC26A11,G6PC3,NFKBIA,POFUT2,CSF2RA,…	87
Amino Acid Metabolism, Molecular Transport, Small Molecule Biochemistry	uptake of L-glutamic acid	7.49e-05	Decreased	-2.177			-2.013	SLC7A10,SLC1A6,SLC7A11,SLC1A2,GLUL,MTDH	6
Cellular Movement	invasion of cells	7.51e-05		1.715			2.052	CHGA,EPS8,NDRG2,UNC5B,KLK6,PDPK1,ODC1,CTNNBIP1,RHOG,KEAP1,GJA1,PRKCQ,MLLT10,MITF,CREB3,COL2A1,FGFR2,PLS1,PLD1,IGFBP2,S1PR3,IL33,SPARCL1,ADRA2A,JAM3,ETV4,PRKCD,RPS6KA1,MTDH,LRIG1,NOTCH1,FYN,MMP15,RPS6KA3,VCAN,TCF12,OGT,NFKBIA,ARRDC3,NFAT5,CST3,MCAM,CTBP2,HEXIM1,GNAS,WASF2,SLC9A3R1,EDNRB,PDLIM2,SEMA4D,CD82,CHI3L1,GLI1,MAP4K4,CLU	55
Cellular Development, Cellular Growth and Proliferation, Nervous System Development and Function, Tissue Development	development of neurons	7.52e-05		-1.82			-1.485	KIF13B,EPS8,SS18,TRPC3,FGFR3,RHOG,SEMA3D,OLIG2,GALNS,OLIG1,EHD1,Cdkn1c,DLG1,GJA1,PREX2,FGFR2,PLD1,METRN,S1PR3,ZNF423,SPARCL1,STMN3,ETV4,PCDHB6,LRP8,SEZ6L,NOTCH1,FNBP1,FYN,APOE,PLXNA3,EFHD1,RPS6KA3,DCDC2,NFKBIA,NGFR,CLMN,ROBO2,SULF2,TRIM67,ATRX,UGT8,DOCK7,ASPA,PMP22,SEMA4D,DSCAM,P2RX7,PPP1R9A,CLU	50
Nervous System Development and Function, Neurological Disease, Organ Morphology, Organismal Development, Organismal Injury and Abnormalities	abnormal morphology of cerebellar cortex	7.79e-05						ZNF423,SPARCL1,GNAS,FA2H,ARSG,UGT8,LRP8,XPA,GPR37L1,ENHO	10
Dermatological Diseases and Conditions, Organismal Injury and Abnormalities	keratosis	7.96e-05		0.747			0.536	MVD,APOE,GJA1,PRKCQ,Scd2,FGFR2,FGFR3,NFKBIA,CBS/CBSL,PRKCD,KEAP1,CTSC,LRIG1	13
Nervous System Development and Function, Tissue Morphology	quantity of oligodendrocytes	8.13e-05		-0.727			-0.604	FGFR3,FYN,GJA1,SEMA4D,PLP1,OLIG2,NOTCH1	7
Cell Death and Survival	apoptosis	8.74e-05	Increased	2.111			1.914	CCR5,DDX25,QKI,EEF1D,ODC1,ALDH1L1,KEAP1,FGF12,ALDOC,Cdkn1c,SFT2D2,PHIP,SON,PRKCQ,MITF,MAD2L2,FGFR2,FAM129B,PLS1,PLD1,S1PR3,TRAF6,ZNF423,RPS6KA1,VSNL1,SLC8A1,LRIG1,NOTCH1,GSTP1,PHLPP1,SERPINB1,HIST1H1C,FYN,APOE,PIM3,VASH2,PSMB10,PPP2R2A,DDX17,CAMK2N2,VCAN,G6PC3,OGT,CST3,CSF2RA,NGFR,CTBP2,HEXIM1,RPS24,DIP2A,ADCY6,GPAM,PLA2G4A,SEMA4D,CBS/CBSL,ATP1A2,S1PR1,CD82,FOXO4,PLP1,SLC7A11,ATXN3,NDRG2,UNC5B,PD…	132
Cellular Development	differentiation of nervous system	8.74e-05		0.044			0.311	KLF15,CCR5,PLP1,QKI,VCAN,TCF12,FGFR3,GPRC5B,NFKBIA,OLIG2,NGFR,GALNS,ZNF488,OLIG1,MMD2,TSPAN2,FGFR2,UGT8,DOCK7,GDF11,GPR37L1,ASPA,S1PR3,METRN,NDE1,ETV4,S1PR1,GLUL,SLC1A2,KDM4A,CD82,SOX8,NOTCH1,GLI1	34
Nervous System Development and Function, Tissue Morphology	quantity of neuroglia	8.89e-05		-0.906			-0.77	FGFR3,APOE,FYN,GJA1,SEMA4D,PLP1,OLIG2,NGFR,LAMA2,GALNS,SDC3,NOTCH1	12
Cardiovascular System Development and Function	morphology of cardiovascular system	9.11e-05						KLF15,APOE,HIST1H1C,CCR5,CHGA,PIM3,SS18,PPP1R3C,MMP15,PDPK1,LATS2,TRPC3,PLA2G7,COL15A1,NFKBIA,NFAT5,RHOG,SEMA3D,GPR4,CST3,NGFR,ARSB,HEXIM1,NEDD4L,CYP51A1,Cdkn1c,GJA1,WASF2,EDNRB,TKT,COL2A1,TSPAN33,GDF11,IGFBP2,S1PR3,TRAF6,EPN2,PLA2G4A,CBS/CBSL,NPR1,SLC8A1,NOTCH1,P2RX7,CLU,RHBDF1	45
Cancer, Organismal Injury and Abnormalities, Reproductive System Disease	breast cancer	9.22e-05						TUBA1B,CCR5,CCP110,EPS8,QKI,PAQR7,KLK6,RNF7,C8orf44-SGK3/SGK3,LATS2,ODC1,TSPAN15,FGFR3,DDX5,ALDH1L1,GSTM2,GPR4,ABR,KEAP1,ALDOC,NFE2L3,GJA1,PRKCQ,ANLN,ZIC2,CREB3,FGFR2,PREX2,PTPN3,IGFBP2,IL33,IGDCC4,ZNF423,TOP1MT,ETNK2,ABCA8,STMN3,PRKCD,ETV4,GLUL,NFYC,RPS6KA1,SLC8A1,MTDH,TNS1,NOTCH1,TTC39A,GSTP1,RHBDF1,APOE,FYN,HIST1H1C,GRIN2D,MMP15,DDX17,TAOK1,FZD1,ANKRD12,VCAN,POLR2A,DDR2,CSF2RA,KDM6A,MCAM,TMEM2…	88
Amino Acid Metabolism, Molecular Transport, Small Molecule Biochemistry	uptake of amino acids	9.34e-05	Decreased	-2.564			-2.361	SLC7A10,SLC1A6,SLC7A11,SLC6A9,SLC46A1,SLC1A2,GLUL,MTDH,PLD1	9
Molecular Transport	transport of Na+	9.49e-05		-1.342			-1.137	SLC4A4,ATP1B3,GNAS,NDRG2,P2RX4,FGF12,ATP1A2,SLC1A2,NEDD4L,SLC8A1,P2RX7	11
Cellular Development, Cellular Growth and Proliferation, Nervous System Development and Function, Tissue Development	development of oligodendrocytes	9.5e-05						FGFR3,OLIG2,LAMA2,FGFR2,ZNF488,OLIG1,ASPA	7
Cell-To-Cell Signaling and Interaction, Nervous System Development and Function	synaptic transmission	9.96e-05		-0.44			-0.33	CACNA1G,APOE,SLC1A6,SLC7A11,PLP1,EPS8,SLC6A9,ATXN3,GRM3,GRIN2D,NBEA,UNC119,GRM7,DHCR7,PMP22,PLCB4,NFKBIA,CACNA1E,CYTH1,NGFR,FGF12,PCDHB6,SLC1A2,LRP8,PPP1R9A	25
Cancer, Gastrointestinal Disease, Hepatic System Disease, Organismal Injury and Abnormalities	liver tumor	0.000101		0.277			0.232	PPP1R26,ABCG4,FAM208B,GPSM2,ODC1,PEX5L,CYTH1,KEAP1,ABLIM3,JARID2,HS3ST1,ADAMTS16,PHIP,SON,COMTD1,PRKCQ,FGFR2,PTPN3,GPT2,PLD1,SLC7A10,GRM7,ARPC1A,MRNIP,ABCF3,ANAPC5,VPS54,IQSEC3,APOE,CTHRC1,DDX17,ATP10B,LRCH3,OGT,CHDH,KDM6A,CYP51A1,MTSS1L,UTP20,TMC3,DIP2A,SMYD2,TMEM25,PDLIM2,CDH19,FAM155A,GPAM,PLA2G4A,TNS3,MOBP,ATP1A2,WRAP53,NDRG2,PDPK1,TRPC3,TST,CACNA1E,RHOG,GPR4,NBAS,PLEKHA7,SESN3,G2E3,ACSL6,LAM…	208
Cellular Growth and Proliferation	proliferation of central nervous system cells	0.000102		-0.788			-0.687	GNAS,EDNRB,ZIC1,TRPC3,XPA,GPR37L1,VCAN,ZNF423,ADCYAP1R1,CST3,NGFR,GALNS,GLI1,CLU	14
Cell-To-Cell Signaling and Interaction, Nervous System Development and Function	neurotransmission	0.000108		-0.388			-0.273	CACNA1G,APOE,SLC1A6,PLP1,EPS8,SLC7A11,SLC6A9,GRM3,ATXN3,P2RX4,GRIN2D,RPS6KA3,NBEA,UNC119,GRM7,DHCR7,PLCB4,PMP22,NFKBIA,CACNA1E,CYTH1,NGFR,FGF12,ATP1A2,PCDHB6,SLC1A2,LRP8,ST3GAL4,PPP1R9A	29
Cancer, Gastrointestinal Disease, Organismal Injury and Abnormalities	colorectal neoplasia	0.000109						KIF13B,PPP1R26,SLC6A9,ZNF878,FAM208B,GPSM2,ODC1,PEX5L,KEAP1,ABLIM3,JARID2,KCTD3,ADAMTS16,GNG12,NWD1,FGFR2,PTPN3,LGI4,PLD1,SLC7A10,GRM7,ARPC1A,MRNIP,ABCF3,SERPINB1,PIM3,PLXNA3,CKAP4,DDX17,ATP10B,GPRC5B,POFUT2,KDM6A,CTBP2,QDPR,PLIN4,SERTAD2,PPM1E,DIP2A,TMEM25,INO80D,CDH19,FAM155A,PLA2G4A,FGGY,ATP13A4,ENPP6,FOXRED1,FOXO4,KLC4,IDI1,SNX8,CTPS2,PDPK1,ASPG,SRSF6,C8orf44-SGK3/SGK3,TRPC3,DDX5,CACNA1E,GPR4…	232
Embryonic Development, Nervous System Development and Function, Organ Development, Organismal Development, Tissue Development	foliation of cerebellum	0.00011						ZNF423,PLCB4,ABR,ZIC1,LRP8,ZIC4,XPA	7
Cellular Movement	migration of cells	0.000111		-0.491			-0.023	CCR5,CHGA,EPS8,ATP8A1,GRM3,KLK6,PHACTR4,ABR,KEAP1,PLXNB3,GNG12,PRKCQ,MITF,CREB3,MAD2L2,FGFR2,PLD1,TRAF6,S1PR3,MYO9A,LRP8,SLC8A1,VSNL1,NOTCH1,SERPINB1,FYN,APOE,VASH2,CLDN11,SDC3,VCAN,G6PC3,AKAP11,ARRDC3,CST3,CSF2RA,NGFR,CTBP2,STARD13,ROBO2,PDE4DIP,WASF2,PDLIM2,PLA2G4A,TNS3,SEMA4D,CBS/CBSL,NDE1,S1PR1,CD82,ST3GAL4,FOXO4,PLP1,NDRG2,UNC5B,RGCC,RNF7,PDPK1,C8orf44-SGK3/SGK3,PLA2G7,FGFR3,SEMA6D,RHOG,SEMA…	101
Organismal Development	abnormal morphology of body cavity	0.000118						CCR5,CHGA,SS18,PDPK1,LATS2,CTNNBIP1,FGFR3,GPR4,SEMA3D,MTHFD2,NEDD4L,Cdkn1c,DLG1,MFSD2A,GJA1,ARSG,MAD2L2,COL2A1,FGFR2,FZD9,TSPAN33,GDF11,PLS1,FAM20A,IGFBP2,S1PR3,TRAF6,EPN2,PRKCD,NPR1,FADS2,SLC8A1,NOTCH1,TNS1,HSD11B1,RHBDF1,SLC4A4,HIST1H1C,FYN,APOE,MMP15,SLC13A5,CTHRC1,FZD1,AKAP11,DHCR7,NFKBIA,NFAT5,CST3,NGFR,CHST3,ARSB,ROBO2,HEXIM1,CYP51A1,WASF2,EDNRB,SPRY1,SLC9A3R1,XPA,FNIP1,PLA2G4A,CBS/CBSL,ENT…	68
Cell Morphology, Nervous System Development and Function, Tissue Morphology	morphology of neurons	0.000119						FYN,APOE,PLP1,RPS6KA3,VCAN,FGFR3,NFKBIA,OLIG2,NGFR,MAL,GALNS,ROBO2,SULF2,Mt3,ENHO,GJA1,PRKCQ,ATRX,ACSL6,ARSG,UGT8,DOCK7,GDF11,XPA,ZNF423,SPARCL1,PMP22,FA2H,ADCYAP1R1,NDE1,JAM3,S1PR1,LRP8,DSCAM,GLI1,PPP1R9A	36
Cellular Development, Cellular Growth and Proliferation, Nervous System Development and Function, Tissue Development	development of central nervous system cells	0.000122		0.388			0.561	ZNF423,PMP22,PLP1,OLIG2,NGFR,FGFR2,TSPAN2,GALNS,OLIG1,NOTCH1,Mt3	11
Embryonic Development, Organismal Development, Tissue Development	growth of embryonic tissue	0.000122		0.828			1.071	GJA1,ZIC2,ACSL6,ZIC1,PDPK1,FGFR2,FZD9,HHIP,GPR37L1,SERPIND1,FGFR3,CTNNBIP1,S1PR3,NDE1,CST3,S1PR1,SLC1A2,GALNS,NOTCH1,GLI1,CLU	21
Cell Cycle	cell cycle progression	0.000133		1.728			1.911	FOXO4,EPS8,QKI,SS18,RGCC,PDPK1,PHACTR4,C8orf44-SGK3/SGK3,LATS2,FGFR3,L3MBTL1,JARID2,Cdkn1c,TTYH1,DLG1,PHIP,GJA1,SON,PRKCQ,ANLN,MITF,MAD2L2,FGFR2,PTPN3,GDF11,IGFBP2,ST5,PRKCD,NEK4,LRIG1,NOTCH1,FYN,APOE,VASH2,PIM3,CD320,ARPC1B,NELFB,PPP2R2A,RPS6KA3,SDC3,DDX17,CAMK2N2,VCAN,USP3,OGT,NFKBIA,DDR2,NGFR,ARSB,HEXIM1,RPS24,HAUS8,SLC9A3R1,KLHL2,ZIC1,XPA,NDE1,S1PR1,GLI1,CLU	61
Cancer, Gastrointestinal Disease, Organismal Injury and Abnormalities	colorectal cancer	0.000135						KIF13B,PPP1R26,SLC6A9,ZNF878,FAM208B,GPSM2,ODC1,PEX5L,KEAP1,ABLIM3,JARID2,KCTD3,ADAMTS16,GNG12,NWD1,FGFR2,PTPN3,LGI4,PLD1,SLC7A10,GRM7,ARPC1A,MRNIP,ABCF3,SERPINB1,PIM3,PLXNA3,CKAP4,DDX17,ATP10B,GPRC5B,POFUT2,KDM6A,CTBP2,QDPR,PLIN4,SERTAD2,PPM1E,DIP2A,TMEM25,INO80D,CDH19,FAM155A,FGGY,ATP13A4,ENPP6,FOXRED1,FOXO4,KLC4,IDI1,SNX8,CTPS2,PDPK1,ASPG,SRSF6,C8orf44-SGK3/SGK3,TRPC3,DDX5,CACNA1E,GPR4,L3MBTL1…	229
Cellular Growth and Proliferation, Tissue Development	generation of cells	0.000141		-0.121			0.345	KIF13B,CHGA,EPS8,DDX25,QKI,EEF1D,ODC1,OLIG2,PLXNB3,Cdkn1c,PRKCQ,MITF,MAD2L2,TSPAN2,FGFR2,LGI4,PLD1,TRAF6,S1PR3,ZNF423,PCDHB6,FADS2,LRP8,SLC8A1,NOTCH1,PHLPP1,FYN,APOE,VASH2,CLDN11,PLXNA3,EFHD1,FZD1,VCAN,CST3,CSF2RA,NGFR,CLMN,ROBO2,TRIM67,WASF2,ASPA,PLA2G4A,SEMA4D,S1PR1,REC8,POC1A,PLP1,SS18,NDRG2,RGCC,PDPK1,TRPC3,FGFR3,RHOG,SEMA3D,GALNS,OLIG1,EHD1,DLG1,GJA1,MLLT10,LAMA2,PREX2,IGFBP2,ELF1,METRN,IL33…	105
Cardiovascular System Development and Function, Organ Morphology, Organismal Development	morphology of heart	0.000145						KLF15,HIST1H1C,APOE,CCR5,CHGA,SS18,PPP1R3C,MMP15,PDPK1,LATS2,NFKBIA,NFAT5,SEMA3D,ARSB,HEXIM1,NEDD4L,CYP51A1,Cdkn1c,GJA1,WASF2,TKT,COL2A1,GDF11,IGFBP2,TRAF6,EPN2,PLA2G4A,NPR1,SLC8A1,NOTCH1,P2RX7,CLU,RHBDF1	33
Connective Tissue Disorders, Developmental Disorder, Hereditary Disorder, Organismal Injury and Abnormalities, Skeletal and Muscular Disorders	osteochondrodysplasia	0.000148						GJA1,SH3PXD2B,DDR2,COL9A3,COL2A1,CHST3,COL9A2	7
Molecular Transport	transport of monovalent inorganic cation	0.000153		-1.177			-0.866	SLC4A4,DLG1,CA2,GNAS,SLC46A1,NDRG2,P2RX4,ATP1B3,ADRA2A,ATP1B2,ATP1A2,FGF12,SLC1A2,NEDD4L,SLC8A1,P2RX7,KCNA6	17
Neurological Disease, Skeletal and Muscular Disorders	neuromuscular disease	0.00016						TUBA1B,CHGA,NDRG2,ATXN3,ENO3,PAQR6,FGFR3,RHOG,CYTH1,KEAP1,FGF12,KCNA6,SLC1A6,GJA1,SLC24A3,LAMA2,PTPN3,TRAF6,SPARCL1,ADRA2A,ETV4,MTDH,VSNL1,SYNPR,TAP2,GSTP1,APOE,CA2,GRIN2D,RASA4,VCAN,DHCR7,CST3,NGFR,PPP1R2,MCAM,CYP51A1,PSAT1,GNAS,PDE4DIP,Scd2,KCNIP1,DNAJC1,NBEA,XPA,GPAM,PIAS3,PMP22,S1PR1,SLC1A2,ADAMTSL1,CHI3L1,P2RX7,CLU	54
Organismal Injury and Abnormalities, Tissue Morphology	abnormal morphology of epithelial tissue	0.000173						CLDN11,Neat1,SLC13A5,CTHRC1,C8orf44-SGK3/SGK3,COL15A1,UNC119,FGFR3,NFKBIA,NFAT5,KIF19,NGFR,ARSB,Cdkn1c,DLG1,SLC9A3R1,EDNRB,ARSG,LAMA2,Scd2,MAD2L2,FGFR2,PLS1,GDF11,XPA,FAM20A,S1PR3,ZNF423,CBS/CBSL	29
Organismal Development	growth of organism	0.000176		-0.357			-0.073	APOE,NELFB,SS18,PDPK1,C8orf44-SGK3/SGK3,TTPA,G6PC3,SERPIND1,FGFR3,CTNNBIP1,DHCR7,NFKBIA,RHOG,KDM6A,CST3,MID1IP1,GALNS,Cdkn1c,TTYH1,GJA1,PHIP,PRKCQ,GNAS,WASF2,TKT,ZIC2,ATRX,LAMA2,ACSL6,ZIC1,MAD2L2,FGFR2,FZD9,HHIP,XPA,GPR37L1,S1PR3,EPN2,ETNK2,CBS/CBSL,NDE1,PRKCD,S1PR1,Zfp950,SLC1A2,SLC8A1,NOTCH1,GLI1,CLU,HIP1R	50
Cancer, Organismal Injury and Abnormalities	serous adenocarcinoma	0.00018						SLC4A4,CA2,APOE,HIST1H1C,FOXO4,PLP1,GRM3,HIST1H2BD,RGCC,KLK6,COL15A1,VCAN,FGFR3,KDM6A,DDR2,MCAM,KEAP1,MAL,NFE2L3,SON,GNAS,EDNRB,ATRX,IGFBP2,WSCD1,IL33,SPARCL1,PMP22,TNS3,ABCA8,CBS/CBSL,JAM3,ETV4,SSH3,LRP8,LRIG1,NOTCH1,GLI1,CLU,HSD11B1	40
Cancer, Organismal Injury and Abnormalities	urogenital cancer	0.00018						SLC6A9,ABCG4,RPL39,PAQR7,ZNF878,FAM208B,ODC1,PEX5L,KEAP1,ABLIM3,MTHFD2,JARID2,MKRN1,ADAMTS16,NWD1,PHIP,SON,PRKCQ,KIAA1147,FGFR2,PTPN3,GRM7,MRNIP,ABCF3,NEK4,RPS6KA1,VPS54,HSD11B1,SERPINB1,IQSEC3,APOE,PLXNA3,ATP10B,COL15A1,OGT,ARRDC3,POFUT2,KDM6A,OTUD7B,CYP51A1,PPM1E,TMC3,MPP7,INO80D,WSCD1,TNS3,CBS/CBSL,ATP1A2,TMEM106C,ST3GAL4,WRAP53,FOXO4,SESN2,ZMAT5,RGCC,RNF7,SRSF6,THSD7A,TRPC3,CTNNBIP1,DDX5,CACN…	225
Gene Expression	expression of RNA	0.000199		0.62			0.876	CCR5,DDX25,QKI,RPL39,KLK6,MIF4GD,EEF1D,ODC1,OLIG2,KEAP1,ABLIM3,JARID2,Cdkn1c,NFE2L3,PHIP,PRKCQ,MITF,ZIC2,CREB3,MAD2L2,FGFR2,TRAF6,ZNF423,NEK4,LRP8,TCEA2,RPS6KA1,NOTCH1,GSTP1,KLF15,HIST1H1C,FYN,APOE,PSMB10,FZD1,DDX17,USP3,RITA1,OGT,KDM6A,CSF2RA,CTBP2,HEXIM1,OTUD7B,RPS24,SERTAD2,DIP2A,SMYD2,SEMA4D,S1PR1,CD82,TNNI1,RPS14,FOXO4,PLP1,SS18,ATXN3,RGCC,SRSF6,C8orf44-SGK3/SGK3,CTNNBIP1,FGFR3,DDX5,RHOG,L3M…	109
Cancer, Organismal Injury and Abnormalities, Reproductive System Disease	female genital tract adenocarcinoma	0.000211						ATP8A1,DDX25,GRM3,HIST1H2BD,RPL39,PAQR7,KLK6,ZNF878,FAM208B,ODC1,EEF1D,MAST1,ALDH1L1,PEX5L,ABR,KEAP1,ABLIM3,MTHFD2,JARID2,FCHO1,ADAMTS16,NFE2L3,CACNA1G,CAPN5,NWD1,SON,PHIP,PRKCQ,SLC24A3,KIAA1147,FGFR2,TSPAN2,PTPN3,GRM7,TRAF6,MYO9A,MRNIP,SNRNP25,PCDHB6,GLUL,LRP8,LRIG1,ARHGEF10,NOTCH1,HSD11B1,SLC4A4,CA2,APOE,IQSEC3,HIST1H1C,PLXNA3,ANKRD12,SLC26A11,ATP10B,COL15A1,VCAN,AKAP11,OGT,ARRDC3,KDM6A,KIF19,M…	161
Cell Morphology, Nervous System Development and Function, Neurological Disease, Organ Morphology, Organismal Development, Organismal Injury and Abnormalities, Tissue Morphology	abnormal morphology of Purkinje cells	0.000222						SPARCL1,FA2H,ARSG,UGT8,LRP8,XPA,ENHO	7
Embryonic Development, Nervous System Development and Function, Organ Development, Organismal Development, Tissue Development	formation of cerebellum	0.000226						FGFR3,ZNF423,FYN,PLCB4,CBS/CBSL,ABR,ZIC2,ZIC1,LRP8,ZIC4,GLI1,XPA	12
Cancer, Gastrointestinal Disease, Hepatic System Disease, Organismal Injury and Abnormalities	liver carcinoma	0.000226						PPP1R26,ABCG4,FAM208B,GPSM2,PEX5L,CYTH1,KEAP1,ABLIM3,JARID2,HS3ST1,ADAMTS16,PHIP,SON,COMTD1,PRKCQ,FGFR2,PTPN3,GPT2,PLD1,SLC7A10,GRM7,ARPC1A,MRNIP,ABCF3,ANAPC5,VPS54,IQSEC3,APOE,CTHRC1,DDX17,ATP10B,LRCH3,OGT,CHDH,KDM6A,CYP51A1,MTSS1L,UTP20,TMC3,DIP2A,SMYD2,TMEM25,PDLIM2,CDH19,FAM155A,GPAM,PLA2G4A,TNS3,MOBP,ATP1A2,WRAP53,NDRG2,TRPC3,TST,CACNA1E,RHOG,NBAS,PLEKHA7,SESN3,G2E3,ACSL6,LAMA2,OSBPL7,GDF11,…	195
Cellular Development, Cellular Growth and Proliferation, Nervous System Development and Function	proliferation of neuroglia	0.00023		0.146			0.286	S1PR3,FYN,CLDN11,PMP22,PLP1,EDNRB,LAMA2,DOCK7,SDC3,TRPC3,NOTCH1,LGI4,P2RX7	13
Lipid Metabolism, Molecular Transport, Small Molecule Biochemistry	transport of phospholipid	0.000231						APOE,MFSD2A,ATP8A1,ABCG4,PRKCD,PITPNM1,P2RX7,CLU	8
Molecular Transport	transport of inorganic cation	0.000242		-1.689			-1.372	SLC4A4,CACNA1G,CA2,DLG1,CCR5,GJA1,GNAS,SLC46A1,NDRG2,P2RX4,TRPC3,ATP1B3,CACNA1E,ADRA2A,AP3B1,ATP1B2,ATP1A2,FGF12,SLC1A2,NEDD4L,SLC8A1,P2RX7,Mt3,KCNA6	24
Cancer, Endocrine System Disorders, Gastrointestinal Disease, Organismal Injury and Abnormalities	carcinoma in pancreas	0.00025						KIF13B,CHGA,ATP8A1,GRM3,DSCAML1,NUDT14,EMC7,FAM208B,WBSCR17,MAST1,KEAP1,FGF12,ANKRD29,CACNA1G,SON,MITF,ZIC2,TSPAN2,FGFR2,PTPN3,ZNF423,MYO9A,ANAPC5,PCDHB6,LRP8,SLC8A1,ARHGEF10,GSTP1,ARPC1B,PPP2R2A,CTHRC1,KIAA1161,ANKRD12,SLC26A11,COL15A1,VCAN,AKAP11,RITA1,CST3,NGFR,PITPNM1,ROBO2,STRIP1,PLIN4,PDE4DIP,DIP2A,NBEA,INO80D,WSCD1,CDH19,TNS3,FGGY,NDE1,ATP1A2,KCTD5,ADAMTSL1,TNNI1,ST3GAL4,TRIM56,THSD7A,CACN…	108
Organismal Development	morphology of body cavity	0.000256						CCR5,CHGA,SS18,PDPK1,LATS2,ODC1,CTNNBIP1,FGFR3,GPR4,SEMA3D,MTHFD2,NEDD4L,Cdkn1c,DLG1,MFSD2A,GJA1,MLLT10,TKT,ARSG,MAD2L2,COL2A1,FGFR2,FZD9,TSPAN33,GDF11,PLS1,IGFBP2,FAM20A,S1PR3,TRAF6,IL33,EPN2,PRKCD,NPR1,FADS2,PNP,SLC8A1,TNS1,NOTCH1,HSD11B1,RHBDF1,KLF15,SLC4A4,APOE,HIST1H1C,FYN,PPP1R3C,MMP15,SLC13A5,CTHRC1,FZD1,AKAP11,DHCR7,NFKBIA,NFAT5,CST3,NGFR,CHST3,ARSB,ROBO2,HEXIM1,CYP51A1,GNAS,WASF2,EDNRB,S…	77
Cell Morphology	sprouting	0.000284		-0.601			-0.366	FYN,APOE,PIM3,EPS8,SS18,UNC5B,RPS6KA3,TRPC3,NFKBIA,RHOG,SEMA3D,NGFR,CTBP2,GALNS,ROBO2,SULF2,DLG1,ATRX,LAMA2,PLD1,S1PR3,TRAF6,SEMA4D,ETV4,DSCAM,NOTCH1,PPP1R9A,FNBP1	28
Cell Death and Survival	necrosis	0.000285	Increased	2.011			1.874	CCR5,CCP110,QKI,GRM3,KLK6,MIF4GD,EEF1D,ODC1,ALDH1L1,KEAP1,FGF12,ADAMTS16,Cdkn1c,CACNA1G,SFT2D2,PHIP,SON,PRKCQ,MITF,MAD2L2,FGFR2,FAM129B,PLS1,PLD1,S1PR3,TRAF6,ZNF423,NEK4,RPS6KA1,VSNL1,SLC8A1,LRIG1,NOTCH1,GSTP1,PHLPP1,HIST1H1C,FYN,APOE,PIM3,VASH2,PSMB10,PPP2R2A,DDX17,SLC26A11,CAMK2N2,VCAN,G6PC3,OGT,CST3,CSF2RA,NGFR,CTBP2,RPS24,ADCY6,GPAM,PLA2G4A,SEMA4D,CBS/CBSL,ATP1A2,S1PR1,CD82,RPS14,FOXO4,PLP1,S…	130
Nervous System Development and Function	sensation	0.000289		0			0.084	APOE,FYN,HOMER2,EDNRB,SLC9A3R1,GRM3,GRIN2D,P2RX4,COL2A1,PLS1,DCDC2,GRM7,CACNA1E,ADRA2A,ENTPD2,JAM3,NGFR,WHRN,EYA4,LRIG1,P2RX7,KCNA6,WDR1	23
Cancer, Organismal Injury and Abnormalities	pelvic tumor	0.000301						KIF13B,SLC6A9,RPL39,PAQR7,ZNF878,FAM208B,GPSM2,ODC1,PEX5L,KEAP1,ABLIM3,MTHFD2,JARID2,MKRN1,ADAMTS16,NWD1,PHIP,SON,PRKCQ,KIAA1147,FGFR2,PTPN3,GRM7,MRNIP,ABCF3,NEK4,RPS6KA1,VPS54,HSD11B1,SERPINB1,IQSEC3,APOE,PLXNA3,ATP10B,COL15A1,OGT,ARRDC3,KDM6A,CTBP2,OTUD7B,CYP51A1,PLIN4,SPRY1,PPM1E,TMC3,MPP7,INO80D,WSCD1,TNS3,CBS/CBSL,ATP1A2,TMEM106C,ST3GAL4,WRAP53,FOXO4,SESN2,RGCC,RNF7,TRPC3,CTNNBIP1,CACNA1E,GP…	213
Cardiovascular Disease, Organismal Injury and Abnormalities	arteriosclerosis	0.000303		1.976			2.044	APOE,CA2,CCR5,SLC7A11,GRIN2D,TTPA,PLA2G7,VCAN,SERPIND1,SAMD12,NFKBIA,CACNA1E,CST3,ANKRD29,GJA1,UTP20,TKT,CREB3,COL2A1,GSTO1,IL33,PDE8A,ADRA2A,CBS/CBSL,NPR1,S1PR1,LRP8,SEZ6L,CHI3L1,SLC8A1,LRIG1,CLU,FADS1	33
Cancer, Endocrine System Disorders, Gastrointestinal Disease, Organismal Injury and Abnormalities	pancreatic cancer	0.000306						KIF13B,CHGA,ATP8A1,GRM3,KLK6,DSCAML1,NUDT14,EMC7,FAM208B,WBSCR17,MAST1,KEAP1,FGF12,ANKRD29,CACNA1G,SON,MITF,ZIC2,TSPAN2,FGFR2,PTPN3,ZNF423,MYO9A,ANAPC5,PCDHB6,LRP8,SLC8A1,ARHGEF10,GSTP1,ARPC1B,PPP2R2A,CTHRC1,KIAA1161,ANKRD12,SLC26A11,COL15A1,VCAN,AKAP11,RITA1,CST3,CSF2RA,NGFR,PITPNM1,ROBO2,STRIP1,PLIN4,PDE4DIP,DIP2A,NBEA,INO80D,WSCD1,CDH19,TNS3,FGGY,NDE1,ATP1A2,KCTD5,ADAMTSL1,TNNI1,ST3GAL4,TRIM56…	113
Nervous System Development and Function	delay in myelination	0.000307						FGFR3,FYN,MAL	3
Tissue Morphology	quantity of extracellular matrix	0.000307						APOE,NFKBIA,VCAN	3
Cancer, Endocrine System Disorders, Gastrointestinal Disease, Organismal Injury and Abnormalities	pancreatic ductal adenocarcinoma	0.000321						KIF13B,CHGA,ATP8A1,GRM3,DSCAML1,NUDT14,EMC7,FAM208B,WBSCR17,MAST1,KEAP1,FGF12,ANKRD29,CACNA1G,SON,MITF,ZIC2,TSPAN2,PTPN3,ZNF423,MYO9A,ANAPC5,PCDHB6,LRP8,SLC8A1,ARHGEF10,ARPC1B,PPP2R2A,CTHRC1,KIAA1161,ANKRD12,SLC26A11,COL15A1,VCAN,AKAP11,RITA1,NGFR,PITPNM1,ROBO2,STRIP1,PLIN4,PDE4DIP,DIP2A,NBEA,INO80D,WSCD1,CDH19,TNS3,FGGY,NDE1,ATP1A2,KCTD5,ADAMTSL1,TNNI1,ST3GAL4,TRIM56,THSD7A,CACNA1E,SEMA3D,KCNA6,…	105
Lipid Metabolism, Molecular Transport, Small Molecule Biochemistry	concentration of lipid	0.000324		0.25			0.321	SLC4A4,APOE,FOXO4,CHGA,KIF13B,DDX25,PLP1,QKI,PPP1R3C,SLC13A5,RGCC,TTPA,G6PC3,DHCR7,PEX5L,PCK2,NGFR,MID1IP1,NEDD4L,ADCY8,KCNA6,ENHO,MAF1,MFSD2A,GNAS,SLC9A3R1,P2RX4,Scd2,FGFR2,UGT8,XPA,PLD1,THRSP,GRM7,IL33,PLA2G4A,GPAM,PMP22,FA2H,ADRA2A,CBS/CBSL,NPR1,PRKCD,FADS2,SLC1A2,P2RX7,CLU,HSD11B1	48
Cardiovascular System Development and Function	function of cardiovascular system	0.00034		0.368			0.576	KLF15,APOE,MFSD2A,CHGA,GJA1,PRKCQ,GNAS,EDNRB,MITF,P2RX4,ADCY6,TRPC3,PLD1,IL33,CBS/CBSL,NPR1,ATP1A2,ARSB,HEXIM1,NEDD4L,SLC8A1,ST3GAL4,NOTCH1,CLU	24
Digestive System Development and Function, Organismal Development	morphology of mouth	0.000349						SLC4A4,Cdkn1c,GJA1,RPS6KA3,FGFR2,GDF11,FAM20A,FGFR3,TRAF6,ENTPD2,NGFR,ZIC5,CYP51A1	13
Cancer, Organismal Injury and Abnormalities, Reproductive System Disease	TNM stage III breast cancer	0.00035						ZNF423,ETNK2,EPS8,POLR2A,SLC9A3R1,TMEM106C,FGFR2,TSPAN15	8
Organ Morphology, Organismal Development, Renal and Urological System Development and Function	morphology of kidney	0.000354						Cdkn1c,APOE,DLG1,FYN,SPRY1,TKT,ARSG,PDPK1,FGFR2,GDF11,IGFBP2,FAM20A,AKAP11,CTNNBIP1,PLA2G4A,NFAT5,GPR4,FADS2,ROBO2,TNS1,CLU	21
Cancer, Organismal Injury and Abnormalities, Reproductive System Disease	benign neoplasm of female genital organ	0.000354						HIST1H1C,APOE,CLDN11,PLP1,HIST1H2BD,RGCC,KLK6,COL15A1,VCAN,FGFR3,MCAM,KEAP1,MTHFD2,NFE2L3,GNAS,EDNRB,SLC24A3,ATRX,IGFBP2,PLCB4,ABCA8,COL6A3,ADRA2A,LRP8,CTSC,LRIG1,GLI1,NOTCH1,HSD11B1,CLU	30
Developmental Disorder	disorder of stature	0.000392	Decreased	-2.415			-2.629	NBAS,GJA1,ATRX,COL2A1,COL9A3,FGFR2,XPA,FGFR3,SH3PXD2B,DDR2,CHST3,TRMT10A,POC1A,COL9A2,HIP1R	15
Cancer, Gastrointestinal Disease, Hepatic System Disease, Organismal Injury and Abnormalities	hepatobiliary system cancer	0.000393						PPP1R26,ABCG4,FAM208B,GPSM2,PEX5L,CYTH1,KEAP1,ABLIM3,JARID2,HS3ST1,ADAMTS16,PHIP,SON,COMTD1,PRKCQ,FGFR2,PTPN3,GPT2,PLD1,SLC7A10,GRM7,ARPC1A,MRNIP,ABCF3,ANAPC5,VPS54,IQSEC3,APOE,CTHRC1,DDX17,ATP10B,LRCH3,OGT,CHDH,KDM6A,CYP51A1,MTSS1L,UTP20,TMC3,DIP2A,SMYD2,TMEM25,PDLIM2,CDH19,FAM155A,GPAM,PLA2G4A,TNS3,MOBP,ATP1A2,WRAP53,NDRG2,TRPC3,TST,CACNA1E,RHOG,NBAS,PLEKHA7,SESN3,G2E3,ACSL6,LAMA2,OSBPL7,GDF11,…	203
Organismal Injury and Abnormalities	ulcer	0.000403						CCR5,NFKBIA,SLC7A11,COL6A3,NGFR,FADS2,COL9A3,COL2A1,COL9A2,COL15A1,CYP51A1,CLU	12
Neurological Disease	tremor	0.000414		1.657			1.339	CACNA1G,CA2,PMP22,GNAS,PLP1,ADRA2A,ATP1B2,GRIN2D,UGT8,LRP8,TTPA,XPA,ASPA	13
Cancer, Organismal Injury and Abnormalities	pelvic cancer	0.000417						KIF13B,SLC6A9,RPL39,PAQR7,ZNF878,FAM208B,GPSM2,ODC1,PEX5L,KEAP1,ABLIM3,JARID2,MTHFD2,MKRN1,ADAMTS16,NWD1,PHIP,SON,PRKCQ,KIAA1147,FGFR2,PTPN3,GRM7,MRNIP,ABCF3,NEK4,RPS6KA1,VPS54,HSD11B1,SERPINB1,IQSEC3,APOE,PLXNA3,ATP10B,COL15A1,OGT,ARRDC3,KDM6A,CTBP2,OTUD7B,CYP51A1,PLIN4,PPM1E,TMC3,MPP7,INO80D,WSCD1,TNS3,CBS/CBSL,ATP1A2,TMEM106C,ST3GAL4,WRAP53,FOXO4,SESN2,RGCC,RNF7,TRPC3,CTNNBIP1,CACNA1E,GPR4,SES…	211
Cancer, Organismal Injury and Abnormalities, Reproductive System Disease	genital tract cancer	0.000419						PAQR7,RPL39,ZNF878,FAM208B,ODC1,PEX5L,KEAP1,ABLIM3,JARID2,MTHFD2,MKRN1,ADAMTS16,NWD1,PHIP,SON,PRKCQ,KIAA1147,FGFR2,PTPN3,GRM7,MRNIP,ABCF3,NEK4,RPS6KA1,VPS54,HSD11B1,SERPINB1,IQSEC3,APOE,PLXNA3,ATP10B,COL15A1,OGT,ARRDC3,KDM6A,OTUD7B,CYP51A1,TMC3,MPP7,INO80D,WSCD1,TNS3,CBS/CBSL,ATP1A2,TMEM106C,ST3GAL4,WRAP53,FOXO4,SESN2,RGCC,RNF7,TRPC3,CTNNBIP1,CACNA1E,GPR4,SESN3,LAMA2,IGFBP2,SPARCL1,ABCA8,ADRA2A,J…	200
Molecular Transport	transport of metal ion	0.000425		-1.258			-0.975	SLC4A4,CACNA1G,DLG1,CCR5,GJA1,GNAS,NDRG2,P2RX4,TRPC3,ATP1B3,CACNA1E,ADRA2A,AP3B1,ATP1B2,ATP1A2,FGF12,SLC1A2,NEDD4L,SLC8A1,P2RX7,Mt3,KCNA6	22
Digestive System Development and Function, Gastrointestinal Disease, Organismal Development, Organismal Injury and Abnormalities	abnormal morphology of mouth	0.000429						Cdkn1c,SLC4A4,TRAF6,GJA1,ENTPD2,NGFR,RPS6KA3,FGFR2,GDF11,CYP51A1,FAM20A,ZIC5	12
Gene Expression	transcription	0.000435		0.404			0.686	CCR5,QKI,KLK6,EEF1D,OLIG2,KEAP1,ABLIM3,JARID2,Cdkn1c,NFE2L3,PHIP,PRKCQ,MITF,ZIC2,CREB3,MAD2L2,FGFR2,TRAF6,ZNF423,NEK4,LRP8,TCEA2,RPS6KA1,NOTCH1,GSTP1,KLF15,HIST1H1C,FYN,PSMB10,FZD1,DDX17,USP3,RITA1,OGT,KDM6A,CSF2RA,CTBP2,HEXIM1,OTUD7B,SERTAD2,DIP2A,SMYD2,SEMA4D,S1PR1,CD82,TNNI1,RPS14,FOXO4,PLP1,SS18,ATXN3,RGCC,SRSF6,C8orf44-SGK3/SGK3,CTNNBIP1,FGFR3,DDX5,RHOG,L3MBTL1,MID1IP1,OLIG1,DLG1,GJA1,MLLT10…	101
Cancer, Endocrine System Disorders, Organismal Injury and Abnormalities, Reproductive System Disease	ovarian serous tumor	0.000442						SLC4A4,HIST1H1C,FOXO4,APOE,GRM3,HIST1H2BD,RGCC,KLK6,COL15A1,VCAN,FGFR3,KDM6A,MCAM,KEAP1,NFE2L3,SON,GNAS,ATRX,IGFBP2,WSCD1,TNS3,ABCA8,SSH3,LRP8,LRIG1,GLI1,NOTCH1,HSD11B1,CLU	29
Cellular Function and Maintenance, Nervous System Development and Function	function of astrocytes	0.000448						APOE,CCR5,NDRG2,ABR	4
Lipid Metabolism, Molecular Transport, Small Molecule Biochemistry	quantity of cerebroside	0.000448						APOE,PLP1,QKI,PRKCD	4
Renal and Urological System Development and Function	morphology of urinary system	0.000456						Cdkn1c,APOE,DLG1,FYN,SPRY1,TKT,ARSG,PDPK1,FGFR2,GDF11,IGFBP2,FAM20A,AKAP11,CTNNBIP1,PLA2G4A,DHCR7,NFAT5,GPR4,FADS2,ROBO2,TNS1,CLU	22
Cell Signaling, Nucleic Acid Metabolism, Small Molecule Biochemistry	binding of guanosine 5'-O-(3-thiotriphosphate)	0.000469		-1.129			-0.965	S1PR3,CCR5,ADRA2A,CYTH1,S1PR1,GPSM2,RASD1,PHLPP1	8
Connective Tissue Disorders, Developmental Disorder, Hereditary Disorder, Organismal Injury and Abnormalities, Skeletal and Muscular Disorders	chondrodysplasia	0.000469						FGFR3,GJA1,SH3PXD2B,DDR2,COL9A3,COL2A1,CHST3,COL9A2	8
Cancer, Gastrointestinal Disease, Hepatic System Disease, Organismal Injury and Abnormalities	liver cancer	0.000476						PPP1R26,ABCG4,FAM208B,GPSM2,PEX5L,CYTH1,KEAP1,ABLIM3,JARID2,HS3ST1,ADAMTS16,PHIP,SON,COMTD1,PRKCQ,FGFR2,PTPN3,GPT2,PLD1,SLC7A10,GRM7,ARPC1A,MRNIP,ABCF3,ANAPC5,VPS54,IQSEC3,APOE,CTHRC1,DDX17,ATP10B,LRCH3,OGT,CHDH,KDM6A,CYP51A1,MTSS1L,UTP20,TMC3,DIP2A,SMYD2,TMEM25,PDLIM2,CDH19,FAM155A,GPAM,PLA2G4A,TNS3,MOBP,ATP1A2,WRAP53,NDRG2,TRPC3,TST,CACNA1E,RHOG,NBAS,PLEKHA7,SESN3,G2E3,ACSL6,LAMA2,OSBPL7,GDF11,…	199
Cell Morphology, Cellular Assembly and Organization, Cellular Development, Cellular Function and Maintenance, Cellular Growth and Proliferation, Nervous System Development and Function, Tissue Development	branching of neurons	0.000488		-1.558			-1.352	APOE,FYN,DLG1,EPS8,SS18,ATRX,RPS6KA3,TRPC3,PLD1,NFKBIA,RHOG,SEMA4D,SEMA3D,ETV4,NGFR,DSCAM,GALNS,ROBO2,SULF2,NOTCH1,FNBP1,PPP1R9A	22
Gastrointestinal Disease, Organismal Injury and Abnormalities	benign oral disorder	0.00049						SERPINB1,CCR5,GRIN2D,FGFR3,DHCR7,NFKBIA,CST3,HMGCS1,CYP51A1,Cdkn1c,DLG1,EDNRB,MITF,ZIC2,COL2A1,FGFR2,GDF11,FAM20A,ETNK2,CBS/CBSL,ADRA2A,PRKCD,CTSC,LRIG1,POC1A,TAP2,CLU	27
Molecular Transport	transport of ion	0.000491		-1.666			-1.354	SLC4A4,FYN,CA2,CCR5,SLC46A1,NDRG2,SLC26A11,TRPC3,CACNA1E,FGF12,NEDD4L,Mt3,KCNA6,CACNA1G,DLG1,TTYH1,GJA1,GNAS,SLC9A3R1,SLC24A3,P2RX4,ATP1B3,ADRA2A,AP3B1,ATP1B2,ATP1A2,SLC1A2,SLC25A10,SLC8A1,P2RX7	30
Cancer, Dermatological Diseases and Conditions, Organismal Injury and Abnormalities	skin cancer	0.000504		-0.6			-0.605	KIF13B,SLC6A9,ABCG4,COL9A3,FAM208B,ODC1,SAMD12,PEX5L,KEAP1,ABLIM3,PLEKHO2,HS3ST1,KCTD3,ADAMTS16,NWD1,SON,PHIP,PRKCQ,MAD2L2,FGFR2,PTPN3,PLD1,GRM7,SLC7A10,ABCF3,NEK4,RPS6KA1,HSD11B1,IQSEC3,PIM3,CKAP4,DDX17,ATP10B,COL15A1,LRCH3,GPRC5B,ARRDC3,CHDH,POFUT2,KDM6A,NGFR,CTBP2,OTUD7B,MTSS1L,PLIN4,SPRY1,UTP20,PPM1E,ADCY6,TMC3,TMEM25,MPP7,INO80D,GPR37L1,CDH19,WSCD1,FAM155A,TNS3,MOBP,FGGY,SLC25A18,ATP1A2,KLHD…	274
Cancer, Organismal Injury and Abnormalities	stage 3 cancer	0.000509						FYN,EPS8,SLC9A3R1,PSMB10,KLK6,FGFR2,TSPAN15,FGFR3,ZNF423,TOP1MT,ETNK2,POLR2A,PRIM1,CSF2RA,DDR2,TMEM106C	16
Dermatological Diseases and Conditions, Organismal Injury and Abnormalities	skin lesion	0.000512		0.035			-0.02	KIF13B,SLC6A9,ABCG4,COL9A3,FAM208B,ODC1,SAMD12,PEX5L,KEAP1,ABLIM3,PLEKHO2,HS3ST1,KCTD3,ADAMTS16,NWD1,SON,PHIP,PRKCQ,MAD2L2,FGFR2,PTPN3,PLD1,GRM7,SLC7A10,ABCF3,NEK4,FADS2,RPS6KA1,HSD11B1,APOE,IQSEC3,PIM3,CKAP4,DDX17,ATP10B,COL15A1,LRCH3,GPRC5B,ARRDC3,CHDH,POFUT2,KDM6A,NGFR,CTBP2,OTUD7B,MTSS1L,PLIN4,SPRY1,UTP20,PPM1E,ADCY6,TMC3,TMEM25,MPP7,INO80D,GPR37L1,CDH19,WSCD1,FAM155A,TNS3,MOBP,FGGY,SLC25A18,…	277
Cardiovascular Disease, Organismal Injury and Abnormalities	atherosclerosis	0.000516		1.976			2.052	APOE,CA2,CCR5,SLC7A11,GRIN2D,TTPA,PLA2G7,VCAN,SERPIND1,SAMD12,NFKBIA,CACNA1E,CST3,ANKRD29,GJA1,UTP20,TKT,CREB3,GSTO1,IL33,PDE8A,CBS/CBSL,ADRA2A,NPR1,S1PR1,LRP8,SEZ6L,CHI3L1,SLC8A1,LRIG1,CLU,FADS1	32
Organismal Injury and Abnormalities	disorder of pigmentation	0.000518						FGFR3,APOE,FA2H,EDNRB,AP3B1,MITF,FADS2,ANKRD12,CYP51A1,THRSP,FADS1	11
Cancer, Organismal Injury and Abnormalities	genitourinary carcinoma	0.00052						SLC6A9,ABCG4,RPL39,PAQR7,ZNF878,FAM208B,ODC1,PEX5L,KEAP1,ABLIM3,JARID2,MTHFD2,MKRN1,ADAMTS16,NWD1,PHIP,SON,PRKCQ,KIAA1147,FGFR2,PTPN3,GRM7,MRNIP,ABCF3,NEK4,RPS6KA1,VPS54,HSD11B1,IQSEC3,APOE,PLXNA3,ATP10B,COL15A1,OGT,ARRDC3,POFUT2,KDM6A,OTUD7B,PPM1E,TMC3,MPP7,INO80D,WSCD1,TNS3,ATP1A2,TMEM106C,ST3GAL4,WRAP53,FOXO4,SESN2,ZMAT5,RGCC,RNF7,THSD7A,TRPC3,CTNNBIP1,CACNA1E,GPR4,SESN3,LAMA2,IGFBP2,SPARCL1,A…	203
Carbohydrate Metabolism	uptake of monosaccharide	0.000523		0.936			1.094	KLF15,FOXO4,CHGA,PRKCQ,GNAS,PPP1R3C,SLC13A5,PDPK1,FGFR2,PREX2,TRPC3,G6PC3,PLD1,GPAM,FA2H,CSF2RA,PRKCD,NGFR,SLC1A2,ENHO	20
Cellular Growth and Proliferation, Hair and Skin Development and Function	colony formation of skin cell lines	0.000527						MITF,RPS6KA3,GLI1	3
Connective Tissue Disorders, Developmental Disorder, Hereditary Disorder, Organismal Injury and Abnormalities, Skeletal and Muscular Disorders	multiple epiphyseal dysplasia	0.000527						COL9A3,COL2A1,COL9A2	3
Cancer, Organismal Injury and Abnormalities, Reproductive System Disease	breast or ovarian cancer	0.000537						TUBA1B,CCR5,CCP110,ATP8A1,EPS8,QKI,GRM3,HIST1H2BD,PAQR7,KLK6,TSPAN15,EEF1D,ODC1,ALDH1L1,ABR,KEAP1,MTHFD2,FCHO1,ALDOC,NFE2L3,SON,PRKCQ,ZIC2,CREB3,FGFR2,PTPN3,IGDCC4,ZNF423,MYO9A,SNRNP25,GLUL,LRP8,RPS6KA1,SLC8A1,LRIG1,NOTCH1,GSTP1,HSD11B1,SLC4A4,HIST1H1C,FYN,APOE,GRIN2D,DDX17,FZD1,CAMK2N2,ANKRD12,COL15A1,VCAN,KDM6A,CSF2RA,NGFR,ROBO2,OTUD7B,RPS24,STRIP1,C1orf198,NBEA,INO80D,WSCD1,TNS3,TMEM106C,WRAP5…	130
Carbohydrate Metabolism	uptake of carbohydrate	0.000564		1.173			1.342	KLF15,APOE,FOXO4,CHGA,PRKCQ,GNAS,PPP1R3C,SLC13A5,PDPK1,FGFR2,PREX2,TRPC3,G6PC3,PLD1,GPAM,FA2H,CSF2RA,PRKCD,NGFR,SLC1A2,ENHO	21
Cardiovascular Disease, Organismal Injury and Abnormalities	occlusion of artery	0.000571		1.976			2.057	APOE,CA2,CCR5,SLC7A11,GRIN2D,TTPA,PLA2G7,VCAN,SERPIND1,SAMD12,NFKBIA,CACNA1E,RHOG,CST3,ANKRD29,GJA1,UTP20,TKT,CREB3,GSTO1,IL33,PDE8A,ADRA2A,CBS/CBSL,NPR1,S1PR1,LRP8,SEZ6L,CHI3L1,SLC8A1,LRIG1,CLU,FADS1	33
Organismal Injury and Abnormalities, Renal and Urological Disease, Renal and Urological System Development and Function	abnormal morphology of urinary system	0.000574						Cdkn1c,APOE,DLG1,FYN,SPRY1,ARSG,FGFR2,GDF11,FAM20A,AKAP11,CTNNBIP1,PLA2G4A,DHCR7,NFAT5,GPR4,FADS2,ROBO2,TNS1,CLU	19
Embryonic Development, Nervous System Development and Function, Organ Development, Organismal Development, Tissue Development	formation of rhombencephalon	0.000576						FGFR3,ZNF423,FYN,PLCB4,CBS/CBSL,OLIG2,ABR,ZIC2,ZIC1,LRP8,ZIC4,GLI1,XPA	13
Organ Morphology, Organismal Development, Organismal Injury and Abnormalities, Renal and Urological Disease, Renal and Urological System Development and Function	abnormal morphology of kidney	0.000578						Cdkn1c,APOE,DLG1,FYN,SPRY1,ARSG,FGFR2,GDF11,FAM20A,AKAP11,CTNNBIP1,PLA2G4A,NFAT5,GPR4,FADS2,ROBO2,TNS1,CLU	18
Cell Morphology, Nervous System Development and Function, Neurological Disease, Tissue Morphology	abnormal morphology of neurons	0.000582						FYN,APOE,PLP1,RPS6KA3,VCAN,FGFR3,OLIG2,NGFR,ROBO2,SULF2,Mt3,ENHO,GJA1,PRKCQ,ARSG,UGT8,GDF11,XPA,ZNF423,PMP22,SPARCL1,FA2H,NDE1,S1PR1,LRP8,DSCAM,GLI1	27
Cellular Assembly and Organization, Nervous System Development and Function	formation of myelin sheath	0.000585						FYN,PMP22,LAMA2,MAL	4
Cancer, Dermatological Diseases and Conditions, Organismal Injury and Abnormalities	skin tumor	0.0006		0.035			-0.001	KIF13B,SLC6A9,ABCG4,COL9A3,FAM208B,ODC1,SAMD12,PEX5L,KEAP1,ABLIM3,PLEKHO2,HS3ST1,KCTD3,ADAMTS16,NWD1,SON,PHIP,PRKCQ,MAD2L2,FGFR2,PTPN3,PLD1,GRM7,SLC7A10,ABCF3,NEK4,RPS6KA1,HSD11B1,IQSEC3,PIM3,CKAP4,DDX17,ATP10B,COL15A1,LRCH3,GPRC5B,ARRDC3,CHDH,POFUT2,KDM6A,NGFR,CTBP2,OTUD7B,MTSS1L,PLIN4,SPRY1,UTP20,PPM1E,ADCY6,TMC3,TMEM25,MPP7,INO80D,GPR37L1,CDH19,WSCD1,FAM155A,TNS3,MOBP,FGGY,SLC25A18,ATP1A2,KLHD…	275
Connective Tissue Disorders, Developmental Disorder, Gastrointestinal Disease, Organismal Development, Organismal Injury and Abnormalities, Skeletal and Muscular Disorders	congenital malformation of face	0.000604						Cdkn1c,DLG1,EDNRB,MITF,ZIC2,COL2A1,FGFR2,GDF11,FGFR3,DHCR7,CBS/CBSL,ADRA2A,LRIG1,POC1A,CYP51A1	15
Cancer, Organismal Injury and Abnormalities	ductal carcinoma	0.00061						CCP110,KIF13B,CHGA,ATP8A1,GRM3,DSCAML1,NUDT14,EMC7,FAM208B,WBSCR17,MAST1,KEAP1,FGF12,ANKRD29,CACNA1G,SON,MITF,ZIC2,CREB3,TSPAN2,FGFR2,PTPN3,ZNF423,MYO9A,ANAPC5,PCDHB6,LRP8,SLC8A1,ARHGEF10,ARPC1B,PPP2R2A,CTHRC1,KIAA1161,ANKRD12,SLC26A11,COL15A1,VCAN,AKAP11,RITA1,NGFR,PITPNM1,ROBO2,OTUD7B,STRIP1,PLIN4,PDE4DIP,DIP2A,NBEA,INO80D,WSCD1,CDH19,TNS3,FGGY,NDE1,ATP1A2,KCTD5,ADAMTSL1,TNNI1,ST3GAL4,TRIM56,TH…	111
Organismal Development	abnormal morphology of tail	0.00061						TRAF6,FGFR3,HIST1H1C,CBS/CBSL,Scd2,COL2A1,FGFR2,LRIG1,GDF11,CYP51A1	10
Organismal Development	growth of multicellular organism	0.00061						Cdkn1c,DHCR7,ETNK2,GNAS,KDM6A,ATRX,Zfp950,FGFR2,SLC1A2,XPA	10
Molecular Transport	transport of cation	0.00062		-1.689			-1.366	SLC4A4,CA2,CCR5,SLC46A1,NDRG2,TRPC3,CACNA1E,FGF12,NEDD4L,KCNA6,Mt3,CACNA1G,DLG1,GJA1,GNAS,SLC24A3,P2RX4,ATP1B3,ADRA2A,AP3B1,ATP1B2,ATP1A2,SLC1A2,SLC8A1,P2RX7	25
Cell Morphology	morphology of colorectal cancer cell lines	0.000625						FA2H,MITF,PRKCD,MAD2L2,PHLPP1	5
Connective Tissue Development and Function, Organ Morphology, Skeletal and Muscular System Development and Function, Tissue Development	length of long bones	0.000639						Cdkn1c,TRAF6,SH3PXD2B,DDR2,RPS6KA3,COL2A1,ARSB	7
Cell-To-Cell Signaling and Interaction	aggregation of sperm	0.000643						CST3,CLU	2
Cancer, Cell Cycle, Organismal Injury and Abnormalities	arrest in cell cycle progression of melanoma cells	0.000643						PDPK1,C8orf44-SGK3/SGK3	2
Cell Cycle, Nervous System Development and Function	cell cycle progression of satellite cells	0.000643						SDC3,NOTCH1	2
Embryonic Development, Nervous System Development and Function, Organ Development, Organismal Development, Tissue Development	development of cerebellar vermian lobule IX	0.000643						ZIC2,ZIC1	2
Embryonic Development, Nervous System Development and Function, Organ Development, Organismal Development, Tissue Development	development of cerebellar vermian lobule VI	0.000643						ZIC2,ZIC1	2
Embryonic Development, Hair and Skin Development and Function, Organ Development, Organismal Development, Tissue Development	development of sweat gland	0.000643						TRAF6,NFKBIA	2
Cellular Function and Maintenance, Nervous System Development and Function	elimination of motor neurons	0.000643						OLIG2,OLIG1	2
Cellular Development, Cellular Growth and Proliferation, Nervous System Development and Function, Tissue Development	generation of V2 interneurons	0.000643						OLIG2,OLIG1	2
Amino Acid Metabolism, Small Molecule Biochemistry	inactivation of L-glutamic acid	0.000643						SLC1A2,GLUL	2
Cellular Movement	positioning of dendritic cells	0.000643						S1PR3,S1PR1	2
Cell Death and Survival, Cellular Development, Cellular Function and Maintenance	self-renewal of satellite cells	0.000643						SDC3,NOTCH1	2
Auditory Disease, Hereditary Disorder, Neurological Disease, Organismal Injury and Abnormalities	hereditary hearing loss	0.000648						CIB2,PMP22,HOMER2,EPS8,EDNRB,MITF,COL2A1,WHRN,LARS2,EYA4,GPSM2,DCDC2	12
Cellular Movement	cell movement of tumor cell lines	0.000651		0.313			0.676	CCR5,EPS8,NDRG2,GRM3,KLK6,C8orf44-SGK3/SGK3,CTNNBIP1,RHOG,KEAP1,GJA1,PRKCQ,MITF,CREB3,FGFR2,PLD1,IGFBP2,S1PR3,SPARCL1,STMN3,ETV4,PRKCD,RPS6KA1,MTDH,LRIG1,VSNL1,NOTCH1,FYN,ARPC1B,RPS6KA3,SDC3,DCDC2,VCAN,AKAP11,TCF12,NFKBIA,ARRDC3,SH3PXD2B,DDR2,MCAM,CTBP2,STARD13,GNAS,WASF2,SLC9A3R1,EDNRB,PDLIM2,SEMA4D,S1PR1,CD82,GLI1,MAP4K4,CLU	52
Cell Morphology	size of cells	0.000695						KLF15,FYN,FOXO4,APOE,EPS8,SLC6A9,RPS6KA3,PDPK1,TTPA,NGFR,GALNS,Cdkn1c,EHD1,MAF1,MFSD2A,GNAS,SLC9A3R1,LAMA2,GDF11,XPA,PLD1,IGFBP2,IL33,RUFY1,CBS/CBSL,COPRS,NPR1,ATP1B2,RPS6KA1,ST3GAL4,P2RX7,PHLPP1	32
Cellular Growth and Proliferation, Nervous System Development and Function, Organ Development	proliferation of brain cells	0.000749		-0.555			-0.482	ZNF423,GNAS,ADCYAP1R1,CST3,ZIC1,GALNS,GLI1,XPA,CLU,GPR37L1	10
Cellular Development, Cellular Growth and Proliferation, Hematological System Development and Function, Hematopoiesis, Lymphoid Tissue Structure and Development, Tissue Development	development of monocyte-derived macrophages	0.00075						TRAF6,IL33,PIAS3,NFKBIA	4
Cancer, Organismal Injury and Abnormalities	embryonal tumor	0.000751						FYN,NDRG2,TKT,ATRX,LAMA2,PAQR6,IGFBP2,FGFR3,TOP1MT,CACNA1E,SRPK3,DDR2,KDM6A,OLIG2,CSF2RA,ETV4,EYA4,ADAMTSL1,LRIG1,OLIG1,NOTCH1,GLI1,CYP51A1,GSTP1	24
Cellular Movement	migration of tumor cell lines	0.000755		0.205			0.537	FYN,CCR5,GRM3,NDRG2,RPS6KA3,KLK6,C8orf44-SGK3/SGK3,SDC3,VCAN,DCDC2,TCF12,AKAP11,NFKBIA,SH3PXD2B,ARRDC3,RHOG,DDR2,MCAM,KEAP1,CTBP2,GJA1,GNAS,PRKCQ,WASF2,SLC9A3R1,MITF,CREB3,FGFR2,PDLIM2,IGFBP2,PLD1,S1PR3,SPARCL1,SEMA4D,STMN3,ETV4,PRKCD,CD82,VSNL1,MTDH,MAP4K4,NOTCH1,GLI1,CLU	44
Nervous System Development and Function	sensory system development	0.000766		1.374			1.536	FYN,APOE,PSMB10,TTPA,UNC119,FGFR3,SH3PXD2B,OLIG2,NGFR,GALNS,ARSB,Cdkn1c,DLG1,SPRY1,MITF,TKT,SMOC1,COL2A1,FGFR2,HHIP,GDF11,XPA,ASPA,S1PR3,CBS/CBSL,JAM3,ATP1B2,LRP8,SOX8,DSCAM,NOTCH1	31
Developmental Disorder, Hereditary Disorder, Organismal Injury and Abnormalities	dwarfism	0.000811	Decreased	-2.415			-2.628	FGFR3,GJA1,SH3PXD2B,DDR2,ATRX,COL9A3,COL2A1,CHST3,FGFR2,COL9A2,XPA,HIP1R	12
Connective Tissue Disorders, Developmental Disorder, Hereditary Disorder, Organismal Injury and Abnormalities, Skeletal and Muscular Disorders	autosomal dominant craniosynostosis	0.000827						FGFR3,FGFR2,TCF12	3
Cancer, Gastrointestinal Disease, Organismal Injury and Abnormalities	colon tubulovillous adenoma	0.000827						DDX5,GNAS,DDX17	3
Cellular Compromise, Neurological Disease, Organismal Injury and Abnormalities	damage of pyramidal neurons	0.000827						GJA1,SLC1A2,Mt3	3
Cellular Development, Nervous System Development and Function	differentiation of radial glial cells	0.000827						METRN,DOCK7,NOTCH1	3
Nervous System Development and Function	ensheathment of axons	0.000827						CLDN11,PLP1,QKI	3
Developmental Disorder, Neurological Disease, Organismal Injury and Abnormalities	hypoplasia of cerebellar vermis	0.000827						ZNF423,ZIC1,ZIC4	3
Cardiovascular Disease, Cardiovascular System Development and Function	abnormal morphology of cardiovascular system	0.000828						HIST1H1C,APOE,CCR5,CHGA,PIM3,SS18,MMP15,PDPK1,LATS2,TRPC3,COL15A1,NFAT5,SEMA3D,GPR4,CST3,NGFR,ARSB,HEXIM1,CYP51A1,GJA1,WASF2,EDNRB,COL2A1,TSPAN33,S1PR3,TRAF6,EPN2,PLA2G4A,CBS/CBSL,NPR1,SLC8A1,NOTCH1,CLU,RHBDF1	34
Lipid Metabolism, Molecular Transport, Small Molecule Biochemistry	transport of lipid	0.000894		-0.452			-0.219	APOE,MFSD2A,ATP8A1,SLC9A3R1,ABCG4,PCOLCE2,SLC13A5,ACSL6,Scd2,PLD1,IL33,NFKBIA,PRKCD,PITPNM1,SLC25A10,P2RX7,CLU	17
Cellular Function and Maintenance, Cellular Growth and Proliferation	production of cells	0.000904		1.579			1.758	TRAF6,FGFR3,FYN,SERTAD2,NFKBIA,WASF2,OLIG2,PITPNM1,FGFR2,OLIG1,NOTCH1,GDF11	12
Cell Cycle	mitosis	0.000909		1.883			2.022	FYN,APOE,PIM3,EPS8,ARPC1B,PPP2R2A,RPS6KA3,RGCC,LATS2,VCAN,USP3,L3MBTL1,JARID2,ARSB,RPS24,Cdkn1c,DLG1,TTYH1,PHIP,HAUS8,SLC9A3R1,ANLN,MITF,MAD2L2,FGFR2,PTPN3,IGFBP2,NDE1,PRKCD,S1PR1,NEK4	31
Dermatological Diseases and Conditions, Organismal Injury and Abnormalities	hyperkeratosis	0.000932		0.747			0.539	APOE,GJA1,NFKBIA,CBS/CBSL,KEAP1,PRKCD,Scd2,LRIG1,CTSC	9
Cancer, Gastrointestinal Disease, Organismal Injury and Abnormalities	colonic polyposis	0.000945						GNAS,RNF43,PLA2G7,ODC1	4
Cellular Function and Maintenance, Small Molecule Biochemistry	homeostasis of Na+	0.000945						ATP1B3,ATP1B2,ATP1A2,SLC8A1	4
Cancer, Neurological Disease, Organismal Injury and Abnormalities	malignant astrocytoma	0.00096						HIST1H1C,GRM3,KLK6,PAQR6,TAOK1,ODC1,FGFR3,KDM6A,CSF2RA,DDR2,MAL,NFE2L3,SLC9A3R1,ATRX,FGFR2,UGT8,NBEA,IGFBP2,ASPA,TOP1MT,FA2H,ABCA8,MOBP,MAP4K4,GLI1,CLU	26
Organismal Survival	organismal death	0.00097		1.222			0.05	CCR5,CHGA,SLC6A9,ABR,OLIG2,KEAP1,MTHFD2,HS3ST1,ZIC4,Cdkn1c,NFE2L3,MITF,TKT,FGFR2,S1PR3,TRAF6,ZNF423,FADS2,LRP8,SLC8A1,NOTCH1,GSTP1,SLC4A4,HIST1H1C,FYN,APOE,PPP1R3C,DDX17,VCAN,G6PC3,CST3,KIF19,KDM6A,NGFR,MAL,STARD13,ROBO2,HEXIM1,OTUD7B,CYP51A1,QDPR,PDE4DIP,WASF2,SPRY1,ASPA,CBS/CBSL,ATP1A2,S1PR1,REC8,PLP1,SS18,NDRG2,ATXN3,PDPK1,LATS2,CTNNBIP1,FGFR3,DDX5,GPR4,NEDD4L,EHD1,PPP1R14C,DLG1,MFSD2A,TTYH1,G…	117
Embryonic Development, Organismal Development	development of body trunk	0.000985		-0.141			0.135	PDPK1,EEF1D,ODC1,CTNNBIP1,FGFR3,OLIG2,FGF12,JARID2,NEDD4L,ADAMTS16,Cdkn1c,DLG1,GJA1,TKT,COL2A1,FGFR2,GDF11,FAM20A,IGFBP2,S1PR3,TRAF6,NPR1,Zfp950,FADS2,SOX8,SLC8A1,NOTCH1,HSD11B1,KLF15,APOE,FYN,Neat1,FZD1,VCAN,TCF12,OGT,DHCR7,NFAT5,SH3PXD2B,CST3,KDM6A,NGFR,STARD13,CTBP2,ROBO2,ARSB,HEXIM1,SULF2,CYP51A1,WDR1,EDNRB,SPRY1,ZIC1,ZBTB1,HUNK,THRSP,PMP22,TNS3,CBS/CBSL,S1PR1,TNNI1,CHI3L1,GLI1,CLU,HIP1R	65
Cancer, Organismal Injury and Abnormalities, Reproductive System Disease	tumorigenesis of genital organ	0.00101		-0.339			-0.385	RPL39,PAQR7,ZNF878,FAM208B,ODC1,PEX5L,KEAP1,ABLIM3,JARID2,MTHFD2,MKRN1,ADAMTS16,NWD1,PHIP,SON,PRKCQ,KIAA1147,FGFR2,PTPN3,GRM7,MRNIP,ABCF3,NEK4,RPS6KA1,VPS54,HSD11B1,SERPINB1,IQSEC3,APOE,PLXNA3,ATP10B,COL15A1,OGT,ARRDC3,KDM6A,OTUD7B,CYP51A1,SPRY1,TMC3,MPP7,INO80D,WSCD1,TNS3,CBS/CBSL,ATP1A2,TMEM106C,ST3GAL4,WRAP53,FOXO4,SESN2,NDRG2,RGCC,RNF7,TRPC3,CTNNBIP1,CACNA1E,GPR4,SESN3,LAMA2,IGFBP2,SPARCL1,AB…	203
Cancer, Dermatological Diseases and Conditions, Organismal Injury and Abnormalities	benign papilloma	0.00103						FAM57A,RHOG,XPA,GSTO1,ODC1,SERPIND1	6
Cancer, Organismal Injury and Abnormalities, Reproductive System Disease	genital tumor	0.00104		-0.339			-0.383	RPL39,PAQR7,ZNF878,FAM208B,ODC1,PEX5L,KEAP1,ABLIM3,JARID2,MTHFD2,MKRN1,ADAMTS16,NWD1,PHIP,SON,PRKCQ,KIAA1147,FGFR2,PTPN3,GRM7,MRNIP,ABCF3,NEK4,RPS6KA1,VPS54,HSD11B1,SERPINB1,IQSEC3,APOE,PLXNA3,ATP10B,COL15A1,OGT,ARRDC3,KDM6A,OTUD7B,CYP51A1,SPRY1,TMC3,MPP7,INO80D,WSCD1,TNS3,CBS/CBSL,ATP1A2,TMEM106C,ST3GAL4,WRAP53,FOXO4,SESN2,NDRG2,RGCC,RNF7,TRPC3,CTNNBIP1,CACNA1E,GPR4,SESN3,LAMA2,IGFBP2,SPARCL1,AB…	203
Nervous System Development and Function	righting reflex	0.00105		-0.277			0.011	S1PR3,EPS8,GNAS,ATP1B2,ZIC1,ZIC4,GLI1	7
Behavior	spatial learning	0.00108						FYN,APOE,CCR5,SLC6A9,ARSG,FZD9,DCDC2,CACNA1E,FA2H,ADRA2A,NGFR,ATP1A2,LRP8,HSD11B1	14
Cancer, Organismal Injury and Abnormalities, Reproductive System Disease	endometrial cancer	0.00109						DDX25,GRM3,HIST1H2BD,RPL39,PAQR7,KLK6,ZNF878,FAM208B,MAST1,ALDH1L1,PEX5L,ABR,KEAP1,ABLIM3,MTHFD2,JARID2,ADAMTS16,NWD1,NFE2L3,CACNA1G,CAPN5,PHIP,SON,PRKCQ,SLC24A3,KIAA1147,TSPAN2,FGFR2,PTPN3,GRM7,TRAF6,MRNIP,PCDHB6,GLUL,ARHGEF10,NOTCH1,SLC4A4,CA2,IQSEC3,HIST1H1C,PLXNA3,ANKRD12,SLC26A11,ATP10B,COL15A1,VCAN,AKAP11,OGT,ARRDC3,KDM6A,KIF19,MAL,CLMN,ROBO2,TRIM67,RPS24,STRIP1,PDE4DIP,TMC3,MPP7,NBEA,INO80…	128
Organismal Survival	morbidity or mortality	0.00112		1.241			0.092	CCR5,CHGA,SLC6A9,ABR,OLIG2,KEAP1,MTHFD2,HS3ST1,ZIC4,Cdkn1c,NFE2L3,MITF,TKT,FGFR2,S1PR3,TRAF6,ZNF423,FADS2,LRP8,SLC8A1,NOTCH1,GSTP1,SLC4A4,SERPINB1,HIST1H1C,FYN,APOE,PPP1R3C,DDX17,VCAN,G6PC3,KIF19,KDM6A,CST3,NGFR,MAL,STARD13,ROBO2,HEXIM1,OTUD7B,CYP51A1,QDPR,PDE4DIP,WASF2,SPRY1,ASPA,CBS/CBSL,ATP1A2,S1PR1,REC8,PLP1,SS18,NDRG2,ATXN3,PDPK1,LATS2,CTNNBIP1,FGFR3,DDX5,GPR4,NEDD4L,EHD1,PPP1R14C,DLG1,MFSD2…	118
Neurological Disease, Organismal Injury and Abnormalities, Psychological Disorders	disorder of basal ganglia	0.00114						TUBA1B,CA2,APOE,CHGA,ATXN3,NDRG2,ENO3,GRIN2D,RASA4,PAQR6,VCAN,DHCR7,RHOG,CYTH1,PPP1R2,FGF12,CYP51A1,ZIC5,PSAT1,SLC1A6,GJA1,PDE4DIP,GNAS,Scd2,DNAJC1,KCNIP1,PTPN3,NBEA,XPA,TRAF6,GPAM,PIAS3,SPARCL1,PMP22,ADRA2A,ETV4,S1PR1,SLC1A2,ADAMTSL1,VSNL1,CHI3L1,MTDH,SYNPR,CLU,GSTP1	45
Cancer, Neurological Disease, Organismal Injury and Abnormalities	central nervous system tumor	0.00117		1.034			1.046	FOXRED1,CCR5,QKI,GRM3,NDRG2,PDPK1,KLK6,PAQR6,PCMTD1,GPSM2,ODC1,FGFR3,OLIG2,PLXNB3,OLIG1,ALDOC,NFE2L3,CACNA1G,CAPN5,GJA1,SON,ANLN,FGFR2,PLD1,IGFBP2,ZNF423,TOP1MT,ABCA8,ADRA2A,SUSD5,PRKCD,ETV4,CACNG5,LRIG1,NOTCH1,RNPEP,CA2,HIST1H1C,MMP15,TAOK1,KDM6A,CSF2RA,DDR2,MAL,CTBP2,EYA4,ADCY8,CYP51A1,PDE4DIP,GNAS,SLC9A3R1,ATRX,RNF43,UGT8,NBEA,PIGA,ASPA,FA2H,MOBP,SLC1A2,CHI3L1,GLI1,MAP4K4,CLU	64
Lipid Metabolism, Small Molecule Biochemistry	synthesis of eicosanoid	0.00118		-0.238			0.059	FYN,APOE,EDNRB,COTL1,MITF,S1PR3,IL33,FGFR3,PLA2G4A,NFKBIA,FAM213B,FADS2,S1PR1,P2RX7,CLU,FADS1	16
Gene Expression	transcription of RNA	0.00119		0.592			0.85	FOXO4,CCR5,ATXN3,SS18,RGCC,KLK6,C8orf44-SGK3/SGK3,EEF1D,FGFR3,CTNNBIP1,DDX5,RHOG,OLIG2,KEAP1,L3MBTL1,ABLIM3,JARID2,OLIG1,Cdkn1c,NFE2L3,DLG1,PHIP,GJA1,PRKCQ,MLLT10,EID1,MITF,NRIP2,ZIC2,CREB3,MAD2L2,FGFR2,FZD9,RASD1,ELF1,TRAF6,IL33,ZNF423,EPN2,PRKCD,ETV4,NEK4,TBKBP1,TCEA2,NFYC,KDM4A,LRP8,SOX8,RPS6KA1,MTDH,NOTCH1,GSTP1,KLF15,HIST1H1C,NELFB,PSMB10,RPS6KA3,DDX17,FZD1,TCF12,USP3,OGT,RITA1,NFKBIA,POLR2A…	90
Cellular Development, Nervous System Development and Function	differentiation of glial progenitor cells	0.00122						DOCK7,NOTCH1,VCAN	3
Cellular Function and Maintenance, Small Molecule Biochemistry	homeostasis of K+	0.00122						ATP1B3,ATP1B2,ATP1A2	3
Lipid Metabolism, Molecular Transport, Small Molecule Biochemistry, Vitamin and Mineral Metabolism	quantity of vitamin E	0.00122						APOE,FGFR2,TTPA	3
Amino Acid Metabolism, Small Molecule Biochemistry	removal of L-glutamic acid	0.00122						SLC1A6,SLC1A2,MTDH	3
Cancer, Organismal Injury and Abnormalities, Reproductive System Disease	female genital tract cancer	0.00123						ATP8A1,DDX25,QKI,GRM3,HIST1H2BD,RPL39,PAQR7,KLK6,ZNF878,FAM208B,ODC1,EEF1D,MAST1,ALDH1L1,PEX5L,ABR,KEAP1,ABLIM3,MTHFD2,JARID2,FCHO1,ADAMTS16,NWD1,CAPN5,CACNA1G,NFE2L3,SON,PHIP,PRKCQ,KIAA1147,SLC24A3,ZIC2,FGFR2,TSPAN2,PTPN3,GRM7,TRAF6,MYO9A,MRNIP,SNRNP25,PCDHB6,GLUL,LRP8,LRIG1,ARHGEF10,NOTCH1,HSD11B1,GSTP1,SLC4A4,CA2,APOE,HIST1H1C,IQSEC3,PLXNA3,CAMK2N2,ANKRD12,SLC26A11,ATP10B,COL15A1,VCAN,AKAP11,O…	174
Respiratory System Development and Function	morphology of respiratory tract	0.00123						Cdkn1c,APOE,GJA1,COL2A1,FGFR2,GDF11,FAM20A,CTNNBIP1,FGFR3,ZNF423,DHCR7,KIF19,DDR2,ARSB,NEDD4L,HSD11B1	16
Behavior	cognition	0.00128		-1.66			-1.436	FYN,APOE,CCR5,PLP1,ATP8A1,SLC7A11,SLC6A9,ATXN3,DCDC2,CACNA1E,PEX5L,PPP1R2,NGFR,GALNS,ADCY8,CACNA1G,GJA1,GNAS,ARSG,FZD9,GPR37L1,GRM7,FA2H,ADRA2A,ATP1A2,LRP8,ST3GAL4,NOTCH1,HSD11B1	29
Endocrine System Disorders, Gastrointestinal Disease, Metabolic Disease, Organismal Injury and Abnormalities, Skeletal and Muscular Disorders	diabetic foot ulcer disorder	0.00129						SLC7A11,COL6A3,COL9A3,COL2A1,COL9A2,COL15A1	6
Reproductive System Development and Function, Respiratory System Development and Function	respiratory rhythm	0.00129						GJA1,SLC6A9,OLIG2,ATP1A2,DSCAM,SULF2	6
Dermatological Diseases and Conditions, Organismal Injury and Abnormalities	senile lentigo	0.00129						FGFR3,FA2H,FADS2,ANKRD12,THRSP,FADS1	6
Cell Signaling	Rac protein signal transduction	0.00136						OGT,RHOG,EPS8,WASF2,STMN3	5
Cellular Development, Cellular Growth and Proliferation, Nervous System Development and Function, Tissue Development	development of astrocytes	0.00136						PLP1,OLIG2,TSPAN2,OLIG1,Mt3	5
Embryonic Development, Nervous System Development and Function, Organ Development, Organismal Development, Tissue Development	formation of cerebellar cortex	0.00136						ZNF423,ZIC2,ZIC1,GLI1,XPA	5
Cancer, Gastrointestinal Disease, Organismal Injury and Abnormalities	gastroesophageal adenocarcinoma	0.00138						ATP8A1,PLP1,EPS8,GRM3,SCRN2,UNC5B,COL9A3,PAQR6,THSD7A,WBSCR17,LATS2,TRPC3,ARHGEF40,SEMA6D,CACNA1E,FGF12,JARID2,ZIC4,ADAMTS16,ANLN,SLC24A3,LAMA2,FGFR2,PREX2,PTPN3,GRM7,ZNF423,TOP1MT,ABCA8,COL6A3,SUSD5,PCDHB6,FADS2,LRIG1,ARHGEF10,TAP2,TNS1,VPS54,GSTP1,SLC46A1,CTHRC1,THSD1,DCDC2,TMEM63A,CSF2RA,NGFR,EYA4,ADCY8,PLIN4,PDE4DIP,GNAS,EDNRB,RNF43,PCOLCE2,PPL,KCNIP1,PIGA,FAM49A,WSCD1,SARDH,CIB2,GPAM,TNS3,CB…	70
Connective Tissue Development and Function, Connective Tissue Disorders, Organismal Development, Organismal Injury and Abnormalities, Skeletal and Muscular Disorders, Skeletal and Muscular System Development and Function, Tissue Development	abnormal morphology of skull	0.00138						Cdkn1c,SLC4A4,GJA1,COL2A1,RPS6KA3,FGFR2,GDF11,PIGA,CTNNBIP1,FGFR3,SH3PXD2B,DDR2,EYA4,ARSB,SULF2,ZIC5	16
Cancer, Organismal Injury and Abnormalities	advanced malignant tumor	0.00139	Increased	2.375			2.517	CCR5,CHGA,SLC7A11,NDRG2,RGCC,RNF7,KLK6,SRSF6,FGFR3,GJA1,PHIP,MITF,CREB3,FGFR2,PTPN3,PLD1,IGFBP2,IL33,TOP1MT,ABCA8,COL6A3,JAM3,NEK4,GLUL,LRP8,RPS6KA1,LRIG1,NOTCH1,HSD11B1,GSTP1,FYN,APOE,GRIN2D,RPS6KA3,CTHRC1,COL15A1,VCAN,TCF12,NFKBIA,PRIM1,CSF2RA,CST3,DDR2,MCAM,HEXIM1,CYP51A1,SERTAD2,EDNRB,SEMA4D,CD82,GLI1,CLU	52
Lipid Metabolism, Small Molecule Biochemistry, Vitamin and Mineral Metabolism	synthesis of cholesterol	0.00139						APOE,FOXO4,DHCR7,PEX5L,IDI1,CYP51A1,ASPA	7
Cancer, Organismal Injury and Abnormalities, Reproductive System Disease	uterine serous papillary cancer	0.00144						NFE2L3,HIST1H1C,CA2,PLP1,EDNRB,KLK6,COL15A1,IL33,SPARCL1,PMP22,ABCA8,CBS/CBSL,JAM3,DDR2,ETV4,MAL	16
Amino Acid Metabolism, Small Molecule Biochemistry	removal of amino acids	0.00144		-1.969			-1.831	SLC1A6,EDNRB,SLC1A2,MTDH	4
Connective Tissue Development and Function, Connective Tissue Disorders, Developmental Disorder, Gastrointestinal Disease, Organ Morphology, Organismal Development, Organismal Injury and Abnormalities, Skeletal and Muscular Disorders, Skeletal and Muscular System Development and Function, Tissue Development	abnormal morphology of maxilla	0.00144						CTNNBIP1,GJA1,COL2A1,FGFR2,ARSB,ZIC5	6
Neurological Disease	dysmyelination of nerves	0.00144		1.452			1.188	PMP22,PLP1,FA2H,LAMA2,TSPAN2,UGT8	6
Cancer, Organismal Injury and Abnormalities	clear-cell adenocarcinoma	0.00145						SLC4A4,APOE,HIST1H1C,CCR5,SESN2,ATXN3,ABCG4,ZMAT5,RPS6KA3,THSD7A,LATS2,TCF12,FGFR3,NFAT5,PEX5L,POFUT2,KDM6A,KEAP1,ROBO2,CTXN3,NFE2L3,GNAS,PDE4DIP,MLLT10,ANLN,PPM1E,ATRX,LAMA2,TMC3,FGFR2,PREX2,PYGB,PTPN3,IGFBP2,FNIP1,CIB2,DISP2,PIAS3,ZFP64,SUSD5,PRKCD,ATP1A2,DSCAM,NOTCH1,CLU,NUDT17,PHLPP1	47
Cancer, Neurological Disease, Organismal Injury and Abnormalities	central nervous system cancer	0.00156						FOXRED1,HIST1H1C,GRM3,KLK6,PAQR6,TAOK1,ODC1,FGFR3,KDM6A,OLIG2,CSF2RA,DDR2,MAL,CTBP2,EYA4,OLIG1,NFE2L3,SLC9A3R1,ATRX,FGFR2,UGT8,NBEA,PIGA,IGFBP2,ASPA,TOP1MT,ABCA8,FA2H,MOBP,CHI3L1,MAP4K4,NOTCH1,GLI1,CLU,RNPEP	35
Neurological Disease, Skeletal and Muscular Disorders	paralysis of limb	0.00156	Increased	2.2			1.94	PMP22,PLP1,ATP1B2,TSPAN2,UGT8	5
Embryonic Development, Nervous System Development and Function, Organ Development, Organismal Development, Tissue Development	formation of forebrain	0.00157						FYN,ATRX,ZIC1,COL2A1,PDPK1,FZD9,CTNNBIP1,FGFR3,ADCYAP1R1,NDE1,OLIG2,CHST3,SLC1A2,LRP8,ROBO2,NOTCH1,ZIC5	17
Nervous System Development and Function	reflex	0.00159		-0.404			-0.125	S1PR3,APOE,GRID2IP,PLCB4,EPS8,GNAS,ATP1B2,ZIC1,ZIC4,GLI1	10
Cell Morphology, Cellular Assembly and Organization, Cellular Development, Cellular Function and Maintenance, Cellular Growth and Proliferation, Embryonic Development, Nervous System Development and Function, Tissue Development	dendritic growth/branching	0.00163		-1.454			-1.267	APOE,DLG1,EPS8,SS18,ATRX,RPS6KA3,TRPC3,PLD1,SEMA4D,RHOG,NGFR,GALNS,DSCAM,ROBO2,NOTCH1,FNBP1,PPP1R9A	17
Cancer, Organismal Injury and Abnormalities	cancer of secretory structure	0.00163						CHGA,KIF13B,ATP8A1,GRM3,KLK6,DSCAML1,NUDT14,EMC7,FAM208B,WBSCR17,ODC1,MAST1,KEAP1,FGF12,ANKRD29,MKRN1,CACNA1G,SON,MITF,ZIC2,FGFR2,TSPAN2,PTPN3,ZNF423,MYO9A,ABCF3,ANAPC5,PCDHB6,NEK4,LRP8,RPS6KA1,SLC8A1,ARHGEF10,VPS54,NOTCH1,GSTP1,CA2,SERPINB1,FYN,CLDN11,ARPC1B,PPP2R2A,CTHRC1,KIAA1161,ANKRD12,SLC26A11,COL15A1,VCAN,AKAP11,OGT,RITA1,CST3,CSF2RA,NGFR,PITPNM1,ROBO2,CYP51A1,STRIP1,PLIN4,PDE4DIP,DIP2A,NB…	145
Behavior	behavior	0.00165		-1.964			-1.768	CCR5,ATP8A1,EPS8,SLC7A11,SLC6A9,ATXN3,CACNA1E,PEX5L,ABR,OLIG2,GALNS,Cdkn1c,CACNA1G,PPP1R14C,MFSD2A,GJA1,ARSG,FZD9,S1PR3,GRM7,ZNF423,ADRA2A,PRKCD,FADS2,LRP8,NOTCH1,HSD11B1,FYN,APOE,HOMER2,Neat1,GRIN2D,SDC3,DCDC2,AKAP11,DHCR7,NGFR,PPP1R2,CHST3,ROBO2,ADCY8,ZIC5,ENHO,MAF1,PDE4DIP,GNAS,ZIC1,XPA,GPR37L1,FA2H,ATP1B2,ATP1A2,SLC1A2,P2RX7,PPP1R9A	55
Cancer, Dermatological Diseases and Conditions, Organismal Injury and Abnormalities	malignant cutaneous melanoma cancer	0.00168						KIF13B,SLC6A9,ABCG4,COL9A3,FAM208B,ODC1,SAMD12,PEX5L,KEAP1,ABLIM3,PLEKHO2,HS3ST1,KCTD3,ADAMTS16,NWD1,SON,PHIP,PRKCQ,MAD2L2,FGFR2,PTPN3,PLD1,GRM7,SLC7A10,ABCF3,NEK4,RPS6KA1,HSD11B1,IQSEC3,PIM3,CKAP4,DDX17,ATP10B,COL15A1,LRCH3,GPRC5B,ARRDC3,CHDH,POFUT2,KDM6A,NGFR,CTBP2,OTUD7B,MTSS1L,PLIN4,SPRY1,UTP20,PPM1E,ADCY6,TMC3,TMEM25,MPP7,INO80D,GPR37L1,WSCD1,FAM155A,TNS3,MOBP,FGGY,SLC25A18,ATP1A2,KLHDC7A,TM…	261
Cell Morphology	morphology of cellular protrusions	0.0017						APOE,GJA1,PLP1,EPS8,WASF2,SLC9A3R1,ACSL6,PLS1,XPA,VCAN,S1PR3,ZNF423,PMP22,NFKBIA,FA2H,NGFR,S1PR1,ROBO2,Mt3	19
Nervous System Development and Function	development of dorsal root ganglion	0.00171						PMP22,NGFR,ZIC2	3
Dental Disease, Digestive System Development and Function, Gastrointestinal Disease, Organismal Development, Organismal Injury and Abnormalities	abnormal morphology of molar tooth	0.00174						TRAF6,NGFR,RPS6KA3,FAM20A	4
Organismal Injury and Abnormalities, Renal and Urological Disease, Renal and Urological System Development and Function	abnormal morphology of ureter	0.00179						CTNNBIP1,DLG1,SPRY1,ROBO2,GDF11	5
Cell-To-Cell Signaling and Interaction, Cellular Assembly and Organization, Cellular Function and Maintenance	formation of tight junctions	0.00179		0.447			0.524	DLG1,CLDN11,GJA1,NGFR,MPP7	5
Organismal Injury and Abnormalities, Renal and Urological Disease	nephrosis	0.00184						PDE8A,ZNF423,CA2,CST3,ATP1A2,IQCB1,CLU,GSTP1,DCDC2	9
Cancer, Endocrine System Disorders, Organismal Injury and Abnormalities, Reproductive System Disease	epithelial ovarian cancer	0.00186						WRAP53,FOXO4,ATP8A1,GRM3,HIST1H2BD,RGCC,KLK6,RNF7,EEF1D,ODC1,FGFR3,ARHGEF40,ALDH1L1,CACNA1E,GPR4,ABR,KEAP1,FCHO1,NFE2L3,MFSD2A,SON,PRKCQ,ANLN,LAMA2,FGFR2,IGFBP2,TOP1MT,PYGM,ABCA8,ADCYAP1R1,COL6A3,MYO9A,SNRNP25,SSH3,LRP8,LRIG1,MTDH,NOTCH1,GSTP1,HSD11B1,RNPEP,SLC4A4,APOE,HIST1H1C,LRRC42,IQCB1,CAMK2N2,COL15A1,VCAN,NFAT5,PRIM1,PCK2,KDM6A,MCAM,OTUD7B,STRIP1,PARP16,GNAS,KLHL2,ATRX,NBEA,PISD,INO80D,WSCD…	69
Cellular Movement	invasion of tumor cell lines	0.00187		1.223			1.514	EPS8,NDRG2,UNC5B,RPS6KA3,PDPK1,KLK6,VCAN,TCF12,CTNNBIP1,NFKBIA,NFAT5,ARRDC3,MCAM,KEAP1,CTBP2,HEXIM1,GNAS,PRKCQ,WASF2,SLC9A3R1,MITF,CREB3,COL2A1,FGFR2,PDLIM2,PLS1,IGFBP2,S1PR3,SPARCL1,ADRA2A,JAM3,ETV4,PRKCD,CD82,RPS6KA1,MTDH,LRIG1,GLI1,MAP4K4,CLU	40
Cancer, Gastrointestinal Disease, Organismal Injury and Abnormalities	gastric adenocarcinoma	0.00188						ATP8A1,PLP1,EPS8,SCRN2,GRM3,UNC5B,COL9A3,PAQR6,THSD7A,WBSCR17,LATS2,TRPC3,CACNA1E,FGF12,ZIC4,ANLN,SLC24A3,LAMA2,PREX2,FGFR2,PTPN3,GRM7,TOP1MT,ZNF423,COL6A3,SUSD5,PCDHB6,LRIG1,ARHGEF10,TNS1,TAP2,SLC46A1,THSD1,DCDC2,TMEM63A,CSF2RA,NGFR,EYA4,ADCY8,PLIN4,PDE4DIP,GNAS,EDNRB,RNF43,PCOLCE2,PPL,KCNIP1,PIGA,WSCD1,CIB2,SARDH,TNS3,CBS/CBSL,SLC25A18,S1PR1,SEMA4G,ANKRD13A,GLI1	58
Cancer, Neurological Disease, Organismal Injury and Abnormalities	glioblastoma cancer	0.00188						NFE2L3,HIST1H1C,SLC9A3R1,GRM3,ATRX,KLK6,FGFR2,PAQR6,UGT8,TAOK1,NBEA,IGFBP2,ASPA,FGFR3,TOP1MT,FA2H,ABCA8,MOBP,DDR2,CSF2RA,KDM6A,MAL,MAP4K4,GLI1,CLU	25
Cancer, Gastrointestinal Disease, Organismal Injury and Abnormalities	gastro-esophageal carcinoma	0.00189						ATP8A1,PLP1,EPS8,GRM3,SCRN2,UNC5B,COL9A3,PAQR6,THSD7A,WBSCR17,LATS2,TRPC3,FGFR3,ARHGEF40,SEMA6D,CACNA1E,FGF12,JARID2,ZIC4,ADAMTS16,ANLN,SLC24A3,LAMA2,FGFR2,PREX2,PTPN3,GRM7,ZNF423,TOP1MT,ABCA8,COL6A3,SUSD5,PCDHB6,FADS2,LRIG1,ARHGEF10,TAP2,TNS1,VPS54,NOTCH1,GSTP1,APOE,SLC46A1,CTHRC1,THSD1,DCDC2,TMEM63A,GPRC5B,CSF2RA,NGFR,EYA4,ADCY8,PLIN4,PDE4DIP,GNAS,EDNRB,C1orf198,PCOLCE2,RNF43,PPL,KCNIP1,PIGA,FA…	76
Cardiovascular Disease, Neurological Disease, Organismal Injury and Abnormalities	ischemia of brain	0.00189						PDE8A,PLA2G4A,SLC25A38,CST3,NGFR,CKAP4,VSNL1,ADCY8,PLA2G7,CLU	10
Developmental Disorder, Skeletal and Muscular Disorders	Levy-Hollister syndrome	0.0019						FGFR3,FGFR2	2
Connective Tissue Development and Function, Connective Tissue Disorders, Nervous System Development and Function, Organ Morphology, Organismal Development, Organismal Injury and Abnormalities, Skeletal and Muscular Disorders, Skeletal and Muscular System Development and Function, Tissue Development	abnormal morphology of enlarged vertebral body	0.0019						FGFR3,COL2A1	2
Organismal Development, Skeletal and Muscular Disorders, Skeletal and Muscular System Development and Function	abnormal morphology of long limb	0.0019						FGFR3,XPA	2
Cardiovascular Disease, Organismal Injury and Abnormalities	accumulation of foam cells	0.0019						IL33,APOE	2
Cell-To-Cell Signaling and Interaction, Cellular Assembly and Organization, Tissue Development	adhesion of fibronectin matrix	0.0019						SS18,VCAN	2
Infectious Diseases	advanced infection	0.0019						SLC1A2,CLU	2
Connective Tissue Disorders, Developmental Disorder, Organismal Injury and Abnormalities, Skeletal and Muscular Disorders	coronal craniosynostosis	0.0019						FGFR2,TCF12	2
Hematological System Development and Function, Immune Cell Trafficking, Inflammatory Response, Tissue Development	delay in accumulation of T lymphocytes	0.0019						CCR5,PRKCQ	2
Tissue Morphology	density of Langerhans cells	0.0019						RPS6KA3,RPS6KA1	2
Embryonic Development, Nervous System Development and Function, Organ Development, Organismal Development, Tissue Development	development of layer II-III of neocortex	0.0019						FGFR3,FGFR2	2
Embryonic Development, Hair and Skin Development and Function, Organ Development, Organismal Development, Tissue Development	development of sebaceous glands	0.0019						TRAF6,FGFR2	2
Cellular Assembly and Organization, Cellular Compromise	disruption of phospholipid vesicles	0.0019						APOE,TST	2
Cell-To-Cell Signaling and Interaction, Cellular Assembly and Organization, Cellular Function and Maintenance	function of tight junctions	0.0019						DLG1,MPP7	2
Nervous System Development and Function, Organ Development	growth of cerebral neocortex	0.0019						FGFR3,FGFR2	2
Connective Tissue Disorders, Developmental Disorder, Hereditary Disorder, Ophthalmic Disease, Organismal Injury and Abnormalities	lattice corneal dystrophy type I	0.0019						APOE,CLU	2
Cell Death and Survival	loss of radial glial progenitor cell	0.0019						FGFR3,FGFR2	2
Cell-To-Cell Signaling and Interaction, Cellular Assembly and Organization, Cellular Function and Maintenance	maintenance of zonula adherens	0.0019						KIFC3,PLEKHA7	2
Cell Morphology	morphology of lipid droplets	0.0019						MID1IP1,THRSP	2
Cellular Function and Maintenance, Cellular Growth and Proliferation	production of intermediate neuronal precursors	0.0019						FGFR3,FGFR2	2
Cardiovascular System Development and Function, Organismal Development	re-endothelialization of carotid artery	0.0019						APOE,LRP8	2
Connective Tissue Disorders, Developmental Disorder, Hereditary Disorder, Organismal Injury and Abnormalities, Skeletal and Muscular Disorders	saethre-chotzen syndrome	0.0019						FGFR3,FGFR2	2
Molecular Transport, Small Molecule Biochemistry	secretion of aldesleukin	0.0019						GPAM,PNP	2
Cell Morphology, Inflammatory Response	size of Langerhans cells	0.0019						RPS6KA3,RPS6KA1	2
Lipid Metabolism, Molecular Transport, Small Molecule Biochemistry	transport of succinic acid	0.0019						SLC13A5,SLC25A10	2
Cell Morphology, Cellular Assembly and Organization, Cellular Development, Cellular Function and Maintenance, Cellular Growth and Proliferation, Embryonic Development, Nervous System Development and Function, Tissue Development	branching of neurites	0.00193		-1.54			-1.34	APOE,DLG1,EPS8,SS18,ATRX,RPS6KA3,TRPC3,PLD1,RHOG,SEMA4D,SEMA3D,ETV4,NGFR,DSCAM,GALNS,ROBO2,SULF2,NOTCH1,FNBP1,PPP1R9A	20
Cancer, Gastrointestinal Disease, Organismal Injury and Abnormalities	gastric epithelial cancer	0.00194						ATP8A1,PLP1,EPS8,SCRN2,GRM3,UNC5B,COL9A3,PAQR6,THSD7A,WBSCR17,LATS2,TRPC3,CACNA1E,FGF12,ZIC4,ANLN,SLC24A3,LAMA2,PREX2,FGFR2,PTPN3,GRM7,ZNF423,TOP1MT,COL6A3,SUSD5,PCDHB6,LRIG1,ARHGEF10,TAP2,TNS1,GSTP1,APOE,SLC46A1,THSD1,DCDC2,TMEM63A,CSF2RA,NGFR,EYA4,ADCY8,PLIN4,PDE4DIP,GNAS,EDNRB,RNF43,PCOLCE2,PPL,KCNIP1,PIGA,WSCD1,CIB2,SARDH,TNS3,CBS/CBSL,SLC25A18,S1PR1,SEMA4G,ANKRD13A,GLI1	60
Organ Morphology, Organismal Development, Organismal Injury and Abnormalities, Respiratory Disease, Respiratory System Development and Function	abnormal morphology of nose	0.00196						CTNNBIP1,ZNF423,DHCR7,GJA1,DDR2,COL2A1,GDF11	7
Cell Morphology, Nervous System Development and Function	morphology of neuroglia	0.002						Cdkn1c,GJA1,PMP22,PLP1,FA2H,CBS/CBSL,ABR,ARSG,OLIG1,Mt3	10
Cell Death and Survival, Cellular Compromise, Neurological Disease, Tissue Morphology	degeneration of neurons	0.00201		1.504			1.254	APOE,CHGA,PLP1,EDNRB,ATXN3,TSPAN2,FGFR2,KLK6,UGT8,SCLY,UNC119,ASPA,S1PR3,NGFR,SLC1A2,LRP8,CLU	17
Cell Morphology, Cellular Assembly and Organization, Cellular Development, Cellular Function and Maintenance, Cellular Growth and Proliferation, Nervous System Development and Function, Tissue Development	axonogenesis	0.00201		0.047			0.237	APOE,KIF13B,PLXNA3,FGFR2,DOCK7,PLD1,METRN,PMP22,SEMA4D,RHOG,SEMA3D,ETV4,NGFR,GALNS,ROBO2,NOTCH1	16
Digestive System Development and Function, Organ Morphology, Organismal Development	morphology of tongue	0.00203						Cdkn1c,ENTPD2,NGFR,FGFR2,CYP51A1	5
Cancer, Organismal Injury and Abnormalities	neuroepithelial tumor	0.00203		0.804			0.838	CCR5,QKI,GRM3,PDPK1,PAQR6,KLK6,PCMTD1,GPSM2,ODC1,FGFR3,OLIG2,PLXNB3,ALDOC,CACNA1G,NFE2L3,CAPN5,GJA1,SON,ANLN,FGFR2,PLD1,IGFBP2,TOP1MT,ZNF423,ABCA8,SUSD5,PRKCD,ETV4,CACNG5,LRIG1,NOTCH1,HIST1H1C,MMP15,TAOK1,KDM6A,CSF2RA,DDR2,MAL,CTBP2,ADCY8,CYP51A1,PDE4DIP,GNAS,SLC9A3R1,ATRX,RNF43,UGT8,NBEA,ASPA,FA2H,MOBP,SLC1A2,GLI1,MAP4K4,CLU	55
Cardiovascular Disease, Neurological Disease, Organismal Injury and Abnormalities	cerebrovascular dysfunction	0.00212		1.387			1.333	CA2,APOE,GJA1,GRIN2D,CKAP4,PLA2G7,PDE8A,PLA2G4A,SLC25A38,ADRA2A,CST3,NGFR,ATP1A2,SLC1A2,VSNL1,ADCY8,NOTCH1,CLU	18
Neurological Disease	demyelination	0.00212		1.195			1.078	APOE,CCR5,PMP22,PRKCQ,PLP1,FA2H,S1PR1,TSPAN2,UGT8,ASPA	10
Hematological System Development and Function, Inflammatory Response, Tissue Morphology	quantity of monocytes	0.00212		0.932			0.863	IL33,APOE,GJA1,NFKBIA,GNAS,CBS/CBSL,JAM3,JARID2,FZD9,TSPAN33	10
Cell Morphology, Nervous System Development and Function, Tissue Morphology	morphology of myelin sheath	0.00217						APOE,FYN,PMP22,PLP1,FA2H,DOCK7	6
Metabolic Disease	abnormal activity of enzyme	0.00219						APOE,GNAS,CST3,PPP1R3C,PNP,CTSC,ADCY8,HSD11B1	8
Cell Signaling	small GTPase mediated signal transduction	0.00224		-0.277			-0.33	OGT,EPS8,RHOG,WASF2,SPRY1,ADRA2A,ADCYAP1R1,ABR,STMN3,NGFR,CDC42EP4,PHACTR4,TRIM67,PLD1	14
Behavior	locomotion	0.00227		-0.994			-1.002	APOE,HOMER2,EPS8,ATXN3,GRM3,GRIN2D,ZIC1,PREX2,SDC3,LGI4,GPR37L1,GPRC5B,NFKBIA,CACNA1E,FGF12,ATP1A2,DSCAM,GALNS,SEZ6L,ADCY8,P2RX7,ENHO	22
Cell Morphology	abnormal morphology of stereocilia	0.0023						S1PR3,EPS8,PLS1	3
Amino Acid Metabolism, Small Molecule Biochemistry	clearance of amino acids	0.0023						EDNRB,SLC1A2,MTDH	3
Cell-mediated Immune Response, Cellular Movement, Hematological System Development and Function, Immune Cell Trafficking	egression of T lymphocytes	0.0023						CCR5,JAM3,S1PR1	3
Hair and Skin Development and Function	pigmentation of skin	0.0023						TRAF6,PDPK1,FGFR2	3
Digestive System Development and Function, Organismal Development	morphology of tooth	0.00235						SLC4A4,TRAF6,FGFR3,GJA1,NGFR,RPS6KA3,FAM20A,ZIC5	8
Cell Morphology, Organismal Injury and Abnormalities	swelling of cells	0.00235						PMP22,PLP1,FA2H,PRKCD,TAOK1,SLC8A1,SLC26A11,P2RX7	8
Tissue Development	branching of epithelial tissue	0.00236		0.923			1.083	S1PR3,TRAF6,PIM3,NFKBIA,SEMA4D,LAMA2,CTBP2,UNC5B,FGFR2,NOTCH1	10
Embryonic Development, Nervous System Development and Function, Organ Development, Organ Morphology, Organismal Development, Tissue Development, Visual System Development and Function	morphology of eye	0.00238						Cdkn1c,APOE,DLG1,MITF,TKT,COL2A1,TTPA,GDF11,XPA,UNC119,ASPA,SH3PXD2B,CBS/CBSL,ATP1B2,NGFR,DSCAM,GALNS,LRP8,ARSB,NOTCH1	20
Renal and Urological System Development and Function	osmolality of urine	0.00239		-0.64			-0.395	PLA2G4A,GNAS,NFAT5,GPR4,ADCY6,AKAP11	6
Cell Death and Survival	cell death of hepatoma cell lines	0.00241		-0.003			0.088	FYN,FOXO4,VASH2,SLC7A11,FGFR2,VCAN,S1PR3,NFKBIA,PRKCD,MTDH,SULF2,GALNT10,CLU	13
Cancer, Organismal Injury and Abnormalities	clear cell neoplasm	0.00242						SLC4A4,APOE,HIST1H1C,CCR5,SESN2,ATXN3,ABCG4,ZMAT5,RPS6KA3,PAQR6,THSD7A,LATS2,TCF12,FGFR3,NFAT5,PEX5L,POFUT2,KDM6A,KEAP1,ROBO2,CTXN3,NFE2L3,GNAS,PDE4DIP,MLLT10,ANLN,PPM1E,ATRX,LAMA2,TMC3,FGFR2,PREX2,PYGB,PTPN3,IGFBP2,FNIP1,CIB2,DISP2,PIAS3,ZFP64,SUSD5,PRKCD,ATP1A2,DSCAM,NOTCH1,CLU,NUDT17,PHLPP1	48
Cellular Assembly and Organization, Cellular Function and Maintenance, Tissue Development	formation of actin filaments	0.00245		0.682			0.923	DLG1,FYN,PRKCQ,WASF2,PPM1E,RGCC,CDC42EP2,PLD1,TNS3,SEMA4D,GPR4,NPR1,PRKCD,STARD13,S1PR1,PITPNM1,ARHGEF10,GNG12,PPP1R9A,HIP1R	20
Cellular Development, Cellular Growth and Proliferation	cell proliferation of tumor cell lines	0.00248	Increased	2.165			2.399	CHGA,SLC7A11,EPS8,GRM3,NDRG2,SS18,PDPK1,KLK6,RNF7,C8orf44-SGK3/SGK3,LATS2,ODC1,CTNNBIP1,FGFR3,DDX5,ALDH1L1,OLIG2,KEAP1,CACNA1G,PHIP,GJA1,SON,PRKCQ,MITF,FGFR2,FZD9,PTPN3,PLS1,IGFBP2,RASD1,PLD1,S1PR3,TRAF6,SPARCL1,PYGM,COL6A3,SRPK3,STMN3,PRKCD,RPS6KA1,LRIG1,MTDH,NOTCH1,RAB30,HSD11B1,PHLPP1,FYN,VASH2,CD320,RPS6KA3,DDX17,TTPA,CAMK2N2,VCAN,TCF12,OGT,NFKBIA,ARRDC3,PCK2,NGFR,STARD13,CTBP2,HEXIM1,PLCD4,T…	81
Organ Morphology, Organismal Development, Organismal Injury and Abnormalities, Renal and Urological Disease, Renal and Urological System Development and Function	abnormal morphology of renal tubule	0.0025						Cdkn1c,PLA2G4A,FYN,DLG1,NFAT5,FGFR2,TNS1,FAM20A,AKAP11	9
Neurological Disease	progressive motor neuropathy	0.0025						TUBA1B,APOE,CHGA,ATXN3,NDRG2,GRIN2D,ENO3,PAQR6,AKAP11,FGFR3,CST3,MCAM,NGFR,KEAP1,MTHFD2,KCNA6,SLC1A6,GNAS,SLC24A3,ARSG,DNAJC1,SPARCL1,PMP22,ZFP64,ABCA8,ADRA2A,SLC1A2,ADAMTSL1,TAP2,P2RX7,CLU,GSTP1	32
Cardiovascular Disease, Neurological Disease, Organismal Injury and Abnormalities	cerebral ischemia	0.00251						PDE8A,SLC25A38,CST3,CKAP4,VSNL1,ADCY8,PLA2G7,CLU	8
Developmental Disorder	multiple congenital anomalies	0.00252						CA2,COL9A3,RPS6KA3,G6PC3,FGFR3,DHCR7,DDX5,SH3PXD2B,DDR2,CHST3,CYP51A1,Cdkn1c,PSAT1,DLG1,SLC1A6,GJA1,EDNRB,MITF,COL2A1,ADCY6,LARS2,FGFR2,GDF11,PIGA,ZNF423,PLCB4,ADRA2A,SLC1A2,NOTCH1,COL9A2	30
Lipid Metabolism, Small Molecule Biochemistry	synthesis of fatty acid	0.00252		-0.664			-0.405	APOE,FYN,PLP1,QKI,EDNRB,COTL1,MITF,Scd2,S1PR3,IL33,FGFR3,PLA2G4A,NFKBIA,FAM213B,S1PR1,FADS2,MID1IP1,P2RX7,CLU,FADS1	20
Nervous System Development and Function	coordination	0.00258		-1.27			-0.833	CACNA1G,PLP1,ZIC1,RPS6KA3,TTPA,TRPC3,GPR37L1,ASPA,PLCB4,FA2H,ABR,ATP1B2,SEZ6L,RHBDF1,ENHO	15
Embryonic Development, Hair and Skin Development and Function, Organ Development, Organ Morphology, Organismal Development, Tissue Development	morphogenesis of hair follicle	0.00259						NFKBIA,NGFR,FGFR2,C8orf44-SGK3/SGK3,NOTCH1	5
Embryonic Development, Nervous System Development and Function, Organismal Development	neurogenesis of embryo	0.00259		1.067			1.184	FGFR3,GALNS,GLI1,NOTCH1,XPA	5
Cardiovascular Disease, Neurological Disease, Organismal Injury and Abnormalities	stroke	0.00262						APOE,CA2,GJA1,GRIN2D,CKAP4,PLA2G7,PDE8A,SLC25A38,ADRA2A,CST3,NGFR,SLC1A2,VSNL1,ADCY8	14
Cellular Development, Cellular Growth and Proliferation	development of tumor cell lines	0.00263		-0.8			-0.677	S1PR3,IL33,GJA1,NFKBIA,MITF,MCAM,FGFR2,CD82,FZD1,TRIM67	10
Neurological Disease	dysmyelination	0.00263		0.788			0.659	APOE,CCR5,PMP22,PRKCQ,PLP1,FA2H,LAMA2,S1PR1,TSPAN2,UGT8,ASPA	11
Embryonic Development, Nervous System Development and Function, Organ Development, Organismal Development, Tissue Development, Visual System Development and Function	formation of eye	0.00264		0.447			0.584	FYN,APOE,PSMB10,TTPA,UNC119,SH3PXD2B,NGFR,GALNS,ARSB,Cdkn1c,DLG1,MITF,TKT,SMOC1,COL2A1,FGFR2,HHIP,GDF11,XPA,ASPA,CBS/CBSL,JAM3,ATP1B2,LRP8,SOX8,DSCAM,NOTCH1	27
Cancer	cell transformation	0.00271		-0.746			-0.463	FOXO4,EPS8,RNF7,EEF1D,ODC1,FGFR3,NFKBIA,RHOG,GPR4,CSF2RA,CYTH1,NGFR,STARD13,MLLT10,MITF,FGFR2,FZD9,PISD,IGFBP2,TRAF6,ST5,PRKCD,EIF3I,LRIG1,GLI1,NOTCH1,CLU	27
Cancer, Neurological Disease, Organismal Injury and Abnormalities	gliomatosis	0.00272		0.804			0.843	CCR5,QKI,GRM3,PDPK1,PAQR6,KLK6,PCMTD1,GPSM2,ODC1,FGFR3,OLIG2,PLXNB3,ALDOC,CACNA1G,NFE2L3,CAPN5,GJA1,SON,ANLN,FGFR2,PLD1,IGFBP2,TOP1MT,ZNF423,ABCA8,SUSD5,PRKCD,ETV4,CACNG5,LRIG1,NOTCH1,HIST1H1C,MMP15,TAOK1,KDM6A,CSF2RA,DDR2,MAL,CTBP2,ADCY8,PDE4DIP,GNAS,SLC9A3R1,ATRX,RNF43,UGT8,NBEA,ASPA,FA2H,MOBP,SLC1A2,GLI1,MAP4K4,CLU	54
Cancer, Gastrointestinal Disease, Organismal Injury and Abnormalities	intestinal adenoma	0.00273						NFE2L3,SLC4A4,PSAT1,CA2,GNAS,RNF43,DDX17,ODC1,TCF12,DDX5,SPARCL1,CLMN,LRIG1,CLU	14
Cancer, Organismal Injury and Abnormalities	tumorigenesis of benign tumor	0.00282		0.485			0.446	FOXO4,GNAS,PRKCD,RNF7,LRIG1,NOTCH1,XPA,ODC1,GSTP1	9
Cancer, Organismal Injury and Abnormalities	breast or ovarian carcinoma	0.00282						WRAP53,FOXO4,CCP110,ATP8A1,GRM3,HIST1H2BD,RGCC,PAQR7,KLK6,RNF7,LATS2,ODC1,EEF1D,FGFR3,ARHGEF40,ALDH1L1,CACNA1E,GPR4,ABR,KEAP1,FCHO1,NFE2L3,MFSD2A,SON,GJA1,PRKCQ,ANLN,ZIC2,CREB3,LAMA2,FGFR2,PREX2,PTPN3,IGFBP2,IGDCC4,TOP1MT,PYGM,ABCA8,ADCYAP1R1,COL6A3,STMN3,MYO9A,SNRNP25,ETV4,SSH3,LRP8,RPS6KA1,LRIG1,SLC8A1,MTDH,TNS1,NOTCH1,TTC39A,HSD11B1,GSTP1,RNPEP,SLC4A4,APOE,HIST1H1C,LRRC42,IQCB1,FZD1,ANKRD12,CA…	97
Cancer, Organismal Injury and Abnormalities, Renal and Urological Disease	renal clear cell cancer	0.00282						SLC4A4,HIST1H1C,CCR5,SESN2,ATXN3,ABCG4,ZMAT5,RPS6KA3,THSD7A,LATS2,TCF12,FGFR3,NFAT5,PEX5L,POFUT2,KDM6A,KEAP1,ROBO2,CTXN3,NFE2L3,GNAS,PDE4DIP,MLLT10,ANLN,PPM1E,ATRX,LAMA2,TMC3,FGFR2,PREX2,PYGB,PTPN3,FNIP1,CIB2,DISP2,PIAS3,ZFP64,SUSD5,PRKCD,ATP1A2,DSCAM,NOTCH1,NUDT17,PHLPP1	44
Hereditary Disorder, Neurological Disease, Organismal Injury and Abnormalities, Psychological Disorders, Skeletal and Muscular Disorders	Huntington's Disease	0.00286						APOE,CA2,GRIN2D,ENO3,RASA4,VCAN,DHCR7,RHOG,CYTH1,PPP1R2,FGF12,CYP51A1,PSAT1,SLC1A6,GJA1,PDE4DIP,Scd2,KCNIP1,PTPN3,NBEA,XPA,TRAF6,GPAM,PIAS3,PMP22,ETV4,S1PR1,SLC1A2,VSNL1,CHI3L1,MTDH,SYNPR,CLU	33
Cellular Development, Cellular Growth and Proliferation, Nervous System Development and Function, Tissue Development	proliferation of neuronal cells	0.00289		-0.753			-0.471	APOE,CCR5,PLXNA3,SS18,VCAN,FGFR3,NFKBIA,RHOG,SEMA3D,NGFR,ACAP2,ROBO2,NEDD4L,GJA1,GNAS,CREB3,LAMA2,ACSL6,ADCY6,FZD9,HHIP,XPA,PLD1,ZNF423,SEMA4D,ADCYAP1R1,NDE1,ETV4,PRKCD,RPS6KA1,NOTCH1,CLU	32
Cellular Movement	migration of melanoma cells	0.00291		-1.964			-1.816	GRM3,MCAM,KLK6,CD82	4
Cancer, Organismal Injury and Abnormalities, Reproductive System Disease	Peyronie disease	0.00291						COL6A3,COL9A3,COL2A1,COL9A2,COL15A1	5
Connective Tissue Disorders, Organismal Injury and Abnormalities	advanced Dupuytren contracture	0.00291						COL6A3,COL9A3,COL2A1,COL9A2,COL15A1	5
Cancer, Gastrointestinal Disease, Organismal Injury and Abnormalities	colon adenoma	0.00291						DDX5,GNAS,RNF43,DDX17,ODC1	5
Skeletal and Muscular Disorders	synostosis	0.00291						FGFR3,ZIC1,FGFR2,CYP51A1,TCF12	5
Connective Tissue Disorders, Organismal Injury and Abnormalities	Dupuytren contracture	0.00292						COL6A3,MMP15,COL9A3,COL2A1,COL9A2,ADAMTS16,COL15A1	7
Dermatological Diseases and Conditions, Organismal Injury and Abnormalities	skin pigmentation disorder	0.00292						FGFR3,FA2H,FADS2,ANKRD12,CYP51A1,THRSP,FADS1	7
Behavior	learning	0.00293		-1.472			-1.251	CACNA1G,FYN,APOE,GJA1,CCR5,ATP8A1,SLC7A11,SLC6A9,ATXN3,ARSG,FZD9,DCDC2,GPR37L1,GRM7,CACNA1E,FA2H,PEX5L,ADRA2A,PPP1R2,NGFR,ATP1A2,GALNS,LRP8,ADCY8,NOTCH1,HSD11B1	26
Cardiovascular Disease, Cardiovascular System Development and Function, Cell Morphology, Tissue Morphology	abnormal morphology of pericytes	0.00301						CCR5,CBS/CBSL,NOTCH1	3
Endocrine System Development and Function, Lipid Metabolism, Molecular Transport, Small Molecule Biochemistry	abnormal quantity of corticosterone	0.00301						CHGA,ADCY8,HSD11B1	3
Organismal Injury and Abnormalities, Renal and Urological Disease	cortical renal glomerulopathies	0.00301						Cdkn1c,FYN,CLU	3
Developmental Disorder, Hereditary Disorder, Organismal Injury and Abnormalities	familial short stature	0.00301						NBAS,TRMT10A,POC1A	3
Molecular Transport	import of K+	0.00301						ATP1B3,ATP1B2,ATP1A2	3
Digestive System Development and Function	development of digestive system	0.0031		0.152			0.274	Cdkn1c,SLC4A4,DLG1,GJA1,EDNRB,COL2A1,FGFR2,FZD1,GDF11,FAM20A,TRAF6,FGFR3,OGT,NFKBIA,CST3,NGFR,STARD13,JARID2,Zfp950,MAP4K4,NOTCH1,GLI1,CLU,HIP1R	24
Cancer, Organismal Injury and Abnormalities, Reproductive System Disease	tumorigenesis of reproductive tract	0.00312						ATP8A1,DDX25,QKI,GRM3,HIST1H2BD,RPL39,PAQR7,KLK6,ZNF878,FAM208B,ODC1,EEF1D,MAST1,ALDH1L1,PEX5L,ABR,KEAP1,ABLIM3,MTHFD2,JARID2,FCHO1,ADAMTS16,NWD1,CAPN5,CACNA1G,NFE2L3,SON,PHIP,PRKCQ,KIAA1147,SLC24A3,ZIC2,FGFR2,TSPAN2,PTPN3,GRM7,TRAF6,MYO9A,MRNIP,SNRNP25,PCDHB6,GLUL,LRP8,LRIG1,ARHGEF10,NOTCH1,HSD11B1,GSTP1,SLC4A4,CA2,APOE,HIST1H1C,IQSEC3,CLDN11,PLXNA3,CAMK2N2,ANKRD12,SLC26A11,ATP10B,COL15A1,VCAN,A…	177
Cellular Development, Embryonic Development, Organismal Development, Tissue Development	differentiation of neural stem cells	0.00315		-0.351			-0.225	S1PR3,OLIG2,S1PR1,FGFR2,GALNS,NOTCH1	6
Cancer, Organismal Injury and Abnormalities, Reproductive System Disease	female genital neoplasm	0.00324						ATP8A1,DDX25,QKI,GRM3,HIST1H2BD,RPL39,PAQR7,KLK6,ZNF878,FAM208B,ODC1,EEF1D,MAST1,ALDH1L1,PEX5L,ABR,KEAP1,ABLIM3,MTHFD2,JARID2,FCHO1,ADAMTS16,NWD1,CAPN5,CACNA1G,NFE2L3,SON,PHIP,PRKCQ,KIAA1147,SLC24A3,ZIC2,FGFR2,TSPAN2,PTPN3,GRM7,TRAF6,MYO9A,MRNIP,SNRNP25,PCDHB6,GLUL,LRP8,LRIG1,ARHGEF10,NOTCH1,HSD11B1,GSTP1,SLC4A4,CA2,APOE,HIST1H1C,IQSEC3,CLDN11,PLXNA3,CAMK2N2,ANKRD12,SLC26A11,ATP10B,COL15A1,VCAN,A…	177
Embryonic Development, Nervous System Development and Function, Organ Development, Organismal Development, Tissue Development	development of cerebral cortex	0.00331		-1.982			-1.85	Cdkn1c,FGFR3,APOE,FYN,MFSD2A,PLXNA3,ADCYAP1R1,NDE1,CST3,FGFR2,SLC1A2,LRP8	12
Skeletal and Muscular Disorders	abnormality of limb	0.00336		0.168			0.267	Cdkn1c,APOE,GJA1,COL2A1,FGFR2,GDF11,XPA,FNIP1,AKAP11,TRAF6,IL33,FGFR3,SH3PXD2B,CBS/CBSL,ARSB,SULF2,POC1A,GLI1,P2RX7,CYP51A1	20
Cancer, Organismal Injury and Abnormalities	endometrioid carcinoma	0.00339						ATP8A1,DDX25,GRM3,HIST1H2BD,RPL39,PAQR7,ZNF878,FAM208B,EEF1D,ODC1,MAST1,ALDH1L1,PEX5L,ABR,KEAP1,ABLIM3,MTHFD2,JARID2,FCHO1,ADAMTS16,NWD1,NFE2L3,CACNA1G,CAPN5,SON,PHIP,PRKCQ,SLC24A3,KIAA1147,FGFR2,TSPAN2,PTPN3,GRM7,TRAF6,MYO9A,MRNIP,SNRNP25,PCDHB6,GLUL,ARHGEF10,NOTCH1,SLC4A4,APOE,IQSEC3,PLXNA3,ANKRD12,SLC26A11,ATP10B,COL15A1,VCAN,AKAP11,OGT,ARRDC3,KDM6A,KIF19,CLMN,ROBO2,TRIM67,RPS24,STRIP1,PDE4DIP…	140
Cellular Function and Maintenance, Cellular Growth and Proliferation	production of neurons	0.00339						FGFR3,OLIG2,FGFR2,OLIG1	4
Cancer, Organismal Injury and Abnormalities	connective or soft tissue tumor	0.00341						PLP1,COL9A3,PAQR6,FGFR3,CACNA1E,PEX5L,MTHFD2,PHIP,PRKCQ,SLC24A3,TKT,LAMA2,COL2A1,PREX2,FGFR2,PTPN3,HHIP,FAM20A,IGFBP2,ST5,TOP1MT,ABCA8,COL6A3,SRPK3,ADRA2A,PRKCD,ETV4,PNP,LRIG1,NOTCH1,FYN,CLDN11,RPS6KA3,TAOK1,COL15A1,VCAN,CSF2RA,DDR2,CTBP2,ROBO2,ZIC5,PLIN4,PDE4DIP,GNAS,EDNRB,ATRX,PRR18,INO80D,ATL3,THRSP,WSCD1,PMP22,PLCB4,ADAMTSL1,CTSC,GLI1,COL9A2,MAP4K4,CLU	59
Organismal Functions	hypoactivity of mice	0.00346						CACNA1G,DHCR7,PLCB4,GNAS,PLP1,FA2H,GRIN2D,ZIC1,UGT8,ADCY8,AKAP11,ENHO	12
Cancer, Gastrointestinal Disease, Organismal Injury and Abnormalities	colorectal adenoma	0.00348						NFE2L3,SLC4A4,PSAT1,CA2,GNAS,RNF43,DDX17,ODC1,TCF12,SPARCL1,DDX5,CLMN,CLU	13
Cellular Assembly and Organization, Cellular Function and Maintenance, Tissue Development	formation of actin stress fibers	0.00351		1.453			1.66	FYN,PRKCQ,WASF2,PPM1E,RGCC,PLD1,TNS3,SEMA4D,GPR4,NPR1,STARD13,S1PR1,PITPNM1,ARHGEF10,PPP1R9A,GNG12	16
Cardiovascular System Development and Function, Organ Development	function of heart	0.00351		0.368			0.587	KLF15,APOE,CHGA,GNAS,EDNRB,MITF,ADCY6,IL33,NPR1,ATP1A2,ARSB,HEXIM1,NEDD4L,SLC8A1,NOTCH1,CLU	16
Cancer, Organismal Injury and Abnormalities, Reproductive System Disease	uterine cancer	0.00351						DDX25,QKI,GRM3,HIST1H2BD,RPL39,PAQR7,KLK6,ZNF878,FAM208B,MAST1,ALDH1L1,PEX5L,ABR,KEAP1,ABLIM3,MTHFD2,JARID2,ADAMTS16,NWD1,NFE2L3,CACNA1G,CAPN5,PHIP,SON,PRKCQ,SLC24A3,KIAA1147,ZIC2,FGFR2,TSPAN2,PTPN3,GRM7,TRAF6,MRNIP,PCDHB6,GLUL,ARHGEF10,NOTCH1,GSTP1,SLC4A4,CA2,IQSEC3,HIST1H1C,PLXNA3,ANKRD12,SLC26A11,ATP10B,COL15A1,VCAN,AKAP11,OGT,ARRDC3,KDM6A,KIF19,MAL,CLMN,ROBO2,TRIM67,RPS24,STRIP1,PDE4DIP,TMC3,…	134
Cancer, Organismal Injury and Abnormalities, Reproductive System Disease	endometrioid endometrial cancer	0.00352						DDX25,GRM3,HIST1H2BD,RPL39,PAQR7,ZNF878,FAM208B,MAST1,ALDH1L1,PEX5L,ABR,KEAP1,ABLIM3,MTHFD2,JARID2,ADAMTS16,NWD1,NFE2L3,CACNA1G,CAPN5,PHIP,SON,PRKCQ,SLC24A3,KIAA1147,TSPAN2,FGFR2,PTPN3,TRAF6,GRM7,MRNIP,PCDHB6,GLUL,NOTCH1,ARHGEF10,SLC4A4,IQSEC3,PLXNA3,ANKRD12,SLC26A11,ATP10B,COL15A1,VCAN,AKAP11,OGT,ARRDC3,KDM6A,KIF19,CLMN,ROBO2,TRIM67,STRIP1,RPS24,PDE4DIP,TMC3,MPP7,NBEA,INO80D,ASPA,SEMA4D,FAM155B,…	115
Immunological Disease	abnormal quantity of cytokine	0.00354						S1PR3,PLA2G4A,FYN,CCR5,NFKBIA,CBS/CBSL,MCAM,NGFR,CTSC	9
Developmental Disorder	dysgenesis	0.00357		-1.548			-2.159	FYN,APOE,RPS6KA3,CTHRC1,TTPA,TCF12,FGFR3,NFAT5,GPR4,CHST3,HEXIM1,ZIC4,CYP51A1,DLG1,GJA1,WASF2,ATRX,LAMA2,ZIC1,COL2A1,MAD2L2,LARS2,FGFR2,XPA,FAM20A,ZNF423,TLE4,FADS2,SLC8A1,NOTCH1,RHBDF1	31
Cell Morphology, Cellular Assembly and Organization, Cellular Function and Maintenance	formation of filopodia	0.00361		1.331			1.614	TRAF6,FYN,TTYH1,PRKCQ,RHOG,EPS8,WASF2,NGFR,RPS6KA3,CDC42EP4,SDC3,PPP1R9A	12
Organ Morphology, Organismal Injury and Abnormalities, Reproductive System Development and Function, Reproductive System Disease	abnormal morphology of labyrinthine zone of placenta	0.00364						Cdkn1c,EPN2,CBS/CBSL,SS18,MMP15,FGFR2,SLC8A1	7
Hair and Skin Development and Function, Organ Development	growth of skin	0.00368		-0.286			-0.22	FYN,CHGA,RNF7,FGFR2,KLK6,SRSF6,C8orf44-SGK3/SGK3,ODC1,TRAF6,DDX5,CBS/CBSL,PRKCD,LRIG1,NOTCH1,CLU	15
Cardiovascular Disease, Cardiovascular System Development and Function, Organ Morphology, Organismal Development, Organismal Injury and Abnormalities	abnormal morphology of heart	0.00368						APOE,HIST1H1C,CHGA,GJA1,WASF2,SS18,MMP15,COL2A1,PDPK1,LATS2,TRAF6,PLA2G4A,EPN2,NFAT5,SEMA3D,NPR1,HEXIM1,ARSB,SLC8A1,NOTCH1,CYP51A1,CLU,RHBDF1	23
Organismal Development, Organismal Injury and Abnormalities	abnormal morphology of thoracic cavity	0.00368						APOE,HIST1H1C,CHGA,SS18,MMP15,PDPK1,LATS2,FGFR3,NFAT5,SEMA3D,CST3,ARSB,HEXIM1,NEDD4L,CYP51A1,Cdkn1c,GJA1,WASF2,COL2A1,FGFR2,FAM20A,TRAF6,EPN2,PLA2G4A,NPR1,TLE4,FADS2,SLC8A1,GLI1,NOTCH1,CLU,HSD11B1,RHBDF1	33
Embryonic Development, Nervous System Development and Function, Ophthalmic Disease, Organ Development, Organ Morphology, Organismal Development, Organismal Injury and Abnormalities, Tissue Development, Visual System Development and Function	abnormal morphology of retinal layer	0.00371						APOE,NGFR,DSCAM,TTPA,GDF11,XPA,UNC119,ASPA	8
Embryonic Development, Organismal Development	growth of embryo	0.00371		0.373			0.651	NELFB,SS18,PDPK1,TTPA,SERPIND1,CTNNBIP1,FGFR3,RHOG,CST3,GALNS,TTYH1,GJA1,ZIC2,ZIC1,ACSL6,FGFR2,FZD9,HHIP,GPR37L1,S1PR3,EPN2,NDE1,S1PR1,SLC1A2,SLC8A1,NOTCH1,GLI1,CLU	28
Cell Morphology	abnormal morphology of cochlear hair cell stereocilia	0.00373						EPS8,PLS1	2
Digestive System Development and Function, Gastrointestinal Disease, Organ Morphology, Organismal Development, Organismal Injury and Abnormalities	abnormal morphology of taste bud	0.00373						ENTPD2,NGFR	2
Molecular Transport	abnormal quantity of oxygen	0.00373						EDNRB,SS18	2
Cardiovascular System Development and Function, Organismal Development, Tissue Morphology	area of aorta	0.00373						APOE,EDNRB	2
Cardiovascular System Development and Function, Organismal Development, Tissue Morphology	area of neointima	0.00373						APOE,PLA2G7	2
Embryonic Development, Organismal Development	arrest in development of embryo	0.00373						ODC1,TCF12	2
Cell Morphology, Cellular Function and Maintenance	autophagy of Salmonella typhimurium SL1344	0.00373						PRKCD,PLD1	2
Cellular Development, Cellular Growth and Proliferation, Hematological System Development and Function, Inflammatory Response, Lymphoid Tissue Structure and Development	cell proliferation of Langerhans cells	0.00373						RPS6KA3,RPS6KA1	2
Cell-To-Cell Signaling and Interaction, Cellular Assembly and Organization	communication of gap junctions	0.00373						GJA1,MCAM	2
Neurological Disease, Organismal Injury and Abnormalities	demyelination of corpus callosum	0.00373						S1PR1,ASPA	2
Embryonic Development, Nervous System Development and Function, Organismal Development, Tissue Development	development of cortical subplate	0.00373						FGFR3,FGFR2	2
Developmental Disorder, Hereditary Disorder, Metabolic Disease, Neurological Disease, Ophthalmic Disease, Organismal Injury and Abnormalities	gelatinous drop-like corneal dystrophy	0.00373						APOE,CLU	2
Lipid Metabolism, Small Molecule Biochemistry	hydrolysis of platelet activating factor-C16	0.00373						PLA2G7,PAFAH1B3	2
Cardiovascular Disease, Hematological Disease	hypochromic anemia	0.00373						TRAF6,APOE	2
Cell Death and Survival	lysis of hematopoietic progenitor cells	0.00373						P2RX7,PIGA	2
Cellular Development, Cellular Growth and Proliferation, Nervous System Development and Function, Organ Development, Tissue Development	outgrowth of dorsal root ganglion cells	0.00373						NGFR,VCAN	2
Neurological Disease, Skeletal and Muscular Disorders	paralysis of forelimb	0.00373						ATP1B2,UGT8	2
Carbohydrate Metabolism, Small Molecule Biochemistry	sulfation of proteoglycan	0.00373						APOE,P2RX7	2
Cell Death and Survival	survival of endometrial cancer cell lines	0.00373						FGFR2,MTDH	2
Lipid Metabolism, Small Molecule Biochemistry	synthesis of docosahexaenoic acid	0.00373						FADS2,FADS1	2
Amino Acid Metabolism, Molecular Transport, Small Molecule Biochemistry	uptake of glycine	0.00373						SLC7A10,SLC6A9	2
Amino Acid Metabolism, Molecular Transport, Small Molecule Biochemistry	transport of amino acids	0.00377	Decreased	-2.252			-1.992	SLC7A10,SLC1A6,SLC7A11,SLC6A9,SLC46A1,PRKCD,SLC1A2,GLUL,MTDH,PLD1	10
Cancer, Organismal Injury and Abnormalities, Reproductive System Disease	endometrial carcinoma	0.00382						DDX25,GRM3,HIST1H2BD,RPL39,PAQR7,ZNF878,FAM208B,MAST1,ALDH1L1,PEX5L,ABR,KEAP1,ABLIM3,MTHFD2,JARID2,ADAMTS16,NWD1,NFE2L3,CACNA1G,CAPN5,PHIP,SON,PRKCQ,SLC24A3,KIAA1147,TSPAN2,FGFR2,PTPN3,TRAF6,GRM7,MRNIP,PCDHB6,GLUL,ARHGEF10,NOTCH1,SLC4A4,IQSEC3,PLXNA3,ANKRD12,SLC26A11,ATP10B,COL15A1,VCAN,AKAP11,OGT,ARRDC3,KDM6A,KIF19,CLMN,ROBO2,TRIM67,STRIP1,RPS24,PDE4DIP,TMC3,MPP7,NBEA,INO80D,ASPA,SEMA4D,FAM155B,…	116
Cell Morphology, Nervous System Development and Function	morphology of central nervous system cells	0.00383						FYN,SPARCL1,FA2H,CBS/CBSL,ABR,ARSG,UGT8,LRP8,Mt3,XPA,ENHO	11
Nervous System Development and Function, Neurological Disease, Organ Morphology, Organismal Development, Organismal Injury and Abnormalities	abnormal morphology of cerebellar vermis	0.00384						ZNF423,ZIC1,ZIC4	3
Cardiovascular System Development and Function, Organismal Development, Tissue Morphology	area of blood vessel	0.00384						APOE,EDNRB,PLA2G7	3
Developmental Disorder, Organismal Injury and Abnormalities, Renal and Urological Disease	developmental delay of kidney	0.00384						CTNNBIP1,GNAS,CBS/CBSL	3
Gene Expression, Protein Trafficking	sequestration of transcription factor activity	0.00384						NFKBIA,KEAP1,TONSL	3
Cell Morphology	size of antigen presenting cells	0.00384						APOE,RPS6KA3,RPS6KA1	3
Cardiovascular System Development and Function, Embryonic Development, Organ Development, Organ Morphology, Organismal Development, Tissue Development	thickness of ventricular septum	0.00384						NPR1,PDPK1,HEXIM1	3
Cardiovascular Disease, Organismal Injury and Abnormalities	atherogenesis	0.00391						APOE,CCR5,NFKBIA,CBS/CBSL,CST3,CREB3,SERPIND1	7
Embryonic Development, Nervous System Development and Function, Organismal Development, Tissue Development	neurogenesis of embryonic tissue	0.00393						FGFR3,GALNS,GLI1,XPA	4
Cancer, Organismal Injury and Abnormalities, Skeletal and Muscular Disorders	myosarcoma	0.00395						VCAN,FGFR3,PEX5L,CSF2RA,CTBP2,ROBO2,ZIC5,PLIN4,PHIP,PDE4DIP,SLC24A3,PREX2,FGFR2,PTPN3,PRR18,INO80D,ATL3,THRSP,IGFBP2,WSCD1,TOP1MT,ST5,PNP,NOTCH1,GLI1,MAP4K4	26
Lipid Metabolism, Molecular Transport, Small Molecule Biochemistry	transport of sterol	0.00396		0.001			0.148	IL33,APOE,NFKBIA,SLC9A3R1,ABCG4,PRKCD,PCOLCE2,Scd2,CLU,PLD1	10
Dermatological Diseases and Conditions, Organ Morphology, Organismal Injury and Abnormalities	abnormal morphology of dermis	0.00407						TRAF6,APOE,NFKBIA,CBS/CBSL,FGFR2,C8orf44-SGK3/SGK3	6
Cell Signaling, Molecular Transport, Nucleic Acid Metabolism, Small Molecule Biochemistry	accumulation of cyclic AMP	0.00418		-0.515			-0.485	GRM7,GNAS,ADRA2A,SLC9A3R1,STMN3,S1PR1,ADCY6,PAQR6,VSNL1,ADCY8,RASD1	11
Cardiovascular System Development and Function, Cell Morphology, Cellular Development, Organismal Development, Tissue Development	branching of endothelial cells	0.00419		1.664			1.812	S1PR3,TRAF6,PIM3,LAMA2,CTBP2,UNC5B,NOTCH1	7
Cardiovascular Disease, Organismal Injury and Abnormalities	coronary artery disease	0.0042						CA2,APOE,GJA1,SLC7A11,TKT,PLA2G7,GSTO1,PDE8A,SAMD12,CACNA1E,ADRA2A,NPR1,S1PR1,ANKRD29,LRP8,SEZ6L,SLC8A1,LRIG1,FADS1	19
Digestive System Development and Function	morphology of digestive system	0.00422						SLC4A4,APOE,CCR5,SLC13A5,RPS6KA3,PDPK1,CTHRC1,ODC1,CTNNBIP1,FGFR3,NGFR,MTHFD2,SULF2,CYP51A1,ZIC5,Cdkn1c,DLG1,MFSD2A,GJA1,GNAS,EDNRB,SLC9A3R1,TKT,ARSG,FGFR2,GDF11,PLS1,XPA,FAM20A,IGFBP2,TRAF6,CBS/CBSL,ENTPD2,PRKCD,NPR1,FADS2,GLI1,RHBDF1	38
Cancer, Organismal Injury and Abnormalities, Renal and Urological Disease	urinary tract cancer	0.00423						CCR5,QKI,SLC6A9,SESN2,ATXN3,ABCG4,HIST1H2BD,ZMAT5,SRSF6,ZNF878,THSD7A,LATS2,ODC1,FGFR3,DDX5,PEX5L,KEAP1,NFE2L3,MLLT10,ANLN,MITF,LAMA2,PREX2,FGFR2,PTPN3,DISP2,COL6A3,SUSD5,PRKCD,PNP,NOTCH1,ARHGEF10,GSTP1,RNPEP,PHLPP1,SLC4A4,HIST1H1C,RPS6KA3,RASA4,ANKRD12,TCF12,NFKBIA,NFAT5,SH3PXD2B,POFUT2,PCK2,KDM6A,CSF2RA,PPP1R2,ROBO2,CYP51A1,CTXN3,PDE4DIP,GNAS,PPM1E,ATRX,TMC3,PPL,PYGB,FNIP1,CIB2,PIAS3,ZFP64,ATP1…	67
Nervous System Development and Function, Organ Morphology, Organismal Development	morphology of spinal cord	0.00442						NDE1,SDC3,TTPA,ROBO2,LATS2,GDF11	6
Reproductive System Development and Function, Respiratory System Development and Function	abnormal respiratory rhythm	0.00449						GJA1,SLC6A9,OLIG2,DSCAM,SULF2	5
Developmental Disorder	hypoplasia of cells	0.00449		0.6			0.336	APOE,GJA1,GPR4,ATRX,RHBDF1	5
Lipid Metabolism, Small Molecule Biochemistry	translocation of lipid	0.00449						PLP1,ATP8A1,ABCG4,PRKCD,P2RX7	5
Cellular Development	differentiation of progenitor cells	0.00449		-1.084			-0.904	S1PR3,SPRY1,OLIG2,S1PR1,FGFR2,OLIG1,NOTCH1	7
Embryonic Development, Nervous System Development and Function, Ophthalmic Disease, Organ Development, Organ Morphology, Organismal Development, Organismal Injury and Abnormalities, Tissue Development, Visual System Development and Function	abnormal morphology of eye	0.00451						Cdkn1c,APOE,DLG1,COL2A1,TTPA,GDF11,XPA,UNC119,ASPA,SH3PXD2B,CBS/CBSL,ATP1B2,NGFR,GALNS,DSCAM,ARSB,NOTCH1	17
Nervous System Development and Function, Neurological Disease, Ophthalmic Disease	abnormal morphology of optic nerve	0.00452						FYN,PLP1,FA2H,GDF11	4
Cardiovascular System Development and Function, Organ Morphology, Organismal Development	thickness of heart ventricle	0.00452						APOE,NPR1,PDPK1,HEXIM1	4
Embryonic Development, Organ Development, Organismal Development, Tissue Development	development of sensory organ	0.00454		1.571			1.688	APOE,FYN,PSMB10,CTHRC1,TTPA,UNC119,FGFR3,SH3PXD2B,ABR,NGFR,GALNS,EYA4,ARSB,Cdkn1c,DLG1,MITF,TKT,SMOC1,COL2A1,FGFR2,HHIP,GDF11,XPA,ASPA,CBS/CBSL,JAM3,ATP1B2,LRP8,SOX8,DSCAM,LRIG1,NOTCH1	32
Cancer, Gastrointestinal Disease, Organismal Injury and Abnormalities	stomach tumor	0.00459						SLC7A11,ATP8A1,PLP1,EPS8,QKI,GRM3,SCRN2,UNC5B,COL9A3,KLK6,PAQR6,THSD7A,PHACTR4,WBSCR17,LATS2,TRPC3,ARHGEF40,CACNA1E,FGF12,ZIC4,PLXNB3,G2E3,ANLN,SLC24A3,LAMA2,FGFR2,PREX2,PTPN3,HHIP,GRM7,ZNF423,TOP1MT,COL6A3,SUSD5,ETV4,PCDHB6,LRIG1,ARHGEF10,TAP2,TNS1,GSTP1,TBC1D23,APOE,SLC46A1,THSD1,DCDC2,TMEM63A,CSF2RA,NGFR,MAL,EYA4,ADCY8,PLIN4,PDE4DIP,GNAS,EDNRB,RNF43,PCOLCE2,PPL,KCNIP1,PIGA,WSCD1,SARDH,CIB2,TNS…	72
Hematological System Development and Function, Tissue Morphology	quantity of mononuclear leukocytes	0.00461		1.052			1.318	SLC4A4,APOE,FYN,CCR5,PIM3,PLP1,PSMB10,EEF1D,TCF12,NFKBIA,NFAT5,CHST3,JARID2,GJA1,PRKCQ,GNAS,LAMA2,FGFR2,FZD9,TSPAN33,XPA,FNIP1,ELF1,S1PR3,TRAF6,IL33,PRMT7,SEMA4D,CBS/CBSL,AP3B1,JAM3,PRKCD,S1PR1,PNP,TLE4,CHI3L1,ST3GAL4,NOTCH1,P2RX7,GSTP1	40
Organismal Development, Organismal Injury and Abnormalities	abnormal morphology of abdomen	0.00463						SLC4A4,APOE,FYN,CCR5,SLC13A5,CTHRC1,FZD1,AKAP11,CTNNBIP1,DHCR7,NFKBIA,NFAT5,GPR4,NGFR,MTHFD2,CHST3,ROBO2,ARSB,Cdkn1c,MFSD2A,DLG1,GJA1,SPRY1,SLC9A3R1,EDNRB,ARSG,MAD2L2,FGFR2,TSPAN33,FZD9,GDF11,PLS1,XPA,IGFBP2,FNIP1,FAM20A,S1PR3,TRAF6,PLA2G4A,CBS/CBSL,PRKCD,FADS2,REC8,TNS1,CLU,HSD11B1,RHBDF1	47
Cancer, Organismal Injury and Abnormalities, Renal and Urological Disease	urinary tract tumor	0.00464						CCR5,QKI,SLC6A9,SESN2,ATXN3,ABCG4,HIST1H2BD,ZMAT5,SRSF6,ZNF878,THSD7A,LATS2,ODC1,FGFR3,DDX5,PEX5L,GPR4,KEAP1,NFE2L3,MLLT10,ANLN,MITF,LAMA2,PREX2,FGFR2,PTPN3,DISP2,COL6A3,SUSD5,PRKCD,PNP,ARHGEF10,NOTCH1,GSTP1,RNPEP,PHLPP1,SLC4A4,HIST1H1C,RPS6KA3,RASA4,ANKRD12,TCF12,NFKBIA,NFAT5,SH3PXD2B,POFUT2,PCK2,KDM6A,CSF2RA,PPP1R2,ROBO2,CYP51A1,CTXN3,PDE4DIP,GNAS,PPM1E,ATRX,TMC3,PPL,PYGB,XPA,FNIP1,CIB2,PIAS3,Z…	69
Cancer, Endocrine System Disorders, Organismal Injury and Abnormalities, Reproductive System Disease	gonadal tumor	0.00464						WRAP53,FOXO4,ATP8A1,QKI,GRM3,NDRG2,HIST1H2BD,RGCC,KLK6,RNF7,ODC1,EEF1D,FGFR3,ARHGEF40,ALDH1L1,CACNA1E,GPR4,ABR,KEAP1,MTHFD2,FCHO1,NFE2L3,MFSD2A,SON,PRKCQ,ANLN,LAMA2,FGFR2,IGFBP2,IGDCC4,TOP1MT,PYGM,ABCA8,ADCYAP1R1,COL6A3,MYO9A,SNRNP25,ETV4,SSH3,LRP8,RPS6KA1,LRIG1,MTDH,NOTCH1,GSTP1,HSD11B1,RNPEP,SLC4A4,APOE,HIST1H1C,CLDN11,LRRC42,IQCB1,CAMK2N2,COL15A1,VCAN,NFAT5,PRIM1,PCK2,KDM6A,MCAM,OTUD7B,STRIP1,…	79
Cancer, Organismal Injury and Abnormalities, Skeletal and Muscular Disorders	muscle tumor	0.00465						CLDN11,PLP1,VCAN,FGFR3,PEX5L,CSF2RA,CTBP2,MTHFD2,ROBO2,ZIC5,PLIN4,PHIP,PDE4DIP,EDNRB,SLC24A3,FGFR2,PREX2,PTPN3,PRR18,ATL3,INO80D,IGFBP2,THRSP,WSCD1,ST5,TOP1MT,PLCB4,ABCA8,ADRA2A,COL6A3,SRPK3,PNP,CTSC,MAP4K4,NOTCH1,GLI1,CLU	37
Cancer, Gastrointestinal Disease, Organismal Injury and Abnormalities	gastroesophageal cancer	0.00468						EPS8,ATP8A1,PLP1,QKI,GRM3,SCRN2,UNC5B,COL9A3,KLK6,PAQR6,PHACTR4,THSD7A,WBSCR17,LATS2,TRPC3,FGFR3,ARHGEF40,SEMA6D,CACNA1E,FGF12,JARID2,ZIC4,PLXNB3,ADAMTS16,G2E3,ANLN,SLC24A3,LAMA2,FGFR2,PREX2,PTPN3,HHIP,GRM7,ZNF423,TOP1MT,ABCA8,COL6A3,SUSD5,ETV4,PCDHB6,FADS2,LRIG1,ARHGEF10,TAP2,TNS1,VPS54,NOTCH1,GSTP1,TBC1D23,APOE,SLC46A1,CTHRC1,THSD1,DCDC2,TMEM63A,GPRC5B,CSF2RA,NGFR,MAL,EYA4,ADCY8,PLIN4,GNAS,PDE4…	86
Hematological System Development and Function, Lymphoid Tissue Structure and Development, Tissue Development	growth of lymphoid tissue	0.00473		-0.047			0.083	FGFR3,TRAF6,FYN,PLP1,PRKCQ,NFKBIA,NFAT5,EDNRB,COL2A1,FGFR2,CHI3L1,NOTCH1,TCF12	13
Organ Morphology, Organismal Development, Organismal Injury and Abnormalities, Respiratory Disease, Respiratory System Development and Function	abnormal morphology of nasal cavity	0.0048						ZNF423,DHCR7,COL2A1	3
Cardiovascular Disease, Organismal Injury and Abnormalities	atherosclerosis of aortic root	0.0048						APOE,GJA1,PLA2G7	3
Nervous System Development and Function	development of enteric nervous system	0.0048						EDNRB,SOX8,PHACTR4	3
Cancer, Organismal Injury and Abnormalities, Skeletal and Muscular Disorders	hyperplasia of vascular smooth muscle cells	0.0048						APOE,CST3,SERPIND1	3
Metabolic Disease, Organismal Injury and Abnormalities, Renal and Urological Disease	renal tubular acidosis	0.0048						SLC4A4,CA2,GPR4	3
Lipid Metabolism, Small Molecule Biochemistry	synthesis of 6-keto-prostaglandin F1 alpha	0.0048						APOE,PLA2G4A,NFKBIA	3
Lipid Metabolism, Small Molecule Biochemistry	synthesis of prostaglandin	0.00481		-0.345			-0.101	S1PR3,FGFR3,IL33,APOE,PLA2G4A,NFKBIA,EDNRB,FAM213B,MITF,S1PR1,P2RX7,CLU	12
Cellular Movement	cell movement of neurons	0.00484		-1.209			-0.992	FYN,GJA1,EDNRB,LAMA2,RNF7,SDC3,DCDC2,SEMA4D,ADCYAP1R1,NDE1,PRKCD,NGFR,SLC1A2,LRP8,ROBO2,NOTCH1	16
Behavior	ingestion of ethanol	0.00496		0.447			0.531	CCR5,HOMER2,EPS8,GNAS,SLC6A9	5
Cancer, Gastrointestinal Disease, Organismal Injury and Abnormalities	gastric cancer	0.00499						ATP8A1,PLP1,EPS8,QKI,GRM3,SCRN2,UNC5B,COL9A3,KLK6,PAQR6,THSD7A,PHACTR4,WBSCR17,LATS2,TRPC3,ARHGEF40,CACNA1E,FGF12,ZIC4,PLXNB3,G2E3,ANLN,SLC24A3,LAMA2,FGFR2,PREX2,PTPN3,HHIP,GRM7,ZNF423,TOP1MT,COL6A3,SUSD5,ETV4,PCDHB6,LRIG1,ARHGEF10,TAP2,TNS1,GSTP1,TBC1D23,APOE,SLC46A1,THSD1,DCDC2,TMEM63A,CSF2RA,NGFR,MAL,EYA4,ADCY8,PLIN4,PDE4DIP,GNAS,EDNRB,RNF43,PCOLCE2,PPL,KCNIP1,PIGA,WSCD1,SARDH,CIB2,TNS3,CBS/CB…	71
Molecular Transport	transport of metal	0.00504		-1.366			-1.2	SLC4A4,CACNA1G,DLG1,CCR5,GJA1,GNAS,NDRG2,P2RX4,TRPC3,ATP1B3,CACNA1E,ADRA2A,AP3B1,ATP1B2,ATP1A2,FGF12,SLC1A2,NEDD4L,SLC8A1,P2RX7,Mt3,CLU,KCNA6	23
Connective Tissue Development and Function, Connective Tissue Disorders, Organismal Injury and Abnormalities, Skeletal and Muscular Disorders, Skeletal and Muscular System Development and Function, Tissue Development, Tissue Morphology	abnormal morphology of epiphyseal growth plate	0.00513						Cdkn1c,FGFR3,DDR2,TLE4,COL2A1,ARSB,XPA	7
Organismal Development	development of genitourinary system	0.00513		-1.852			-1.587	DDX25,QKI,SS18,PDPK1,ODC1,CTNNBIP1,ADAMTS16,Cdkn1c,EHD1,DLG1,GJA1,TKT,MAD2L2,FGFR2,GDF11,IGFBP2,TRAF6,ETNK2,ADRA2A,JAM3,Zfp950,FADS2,SOX8,LRP8,SLC8A1,NOTCH1,FYN,APOE,CLDN11,Neat1,MMP15,TTPA,SH3PXD2B,ROBO2,ARSB,HEXIM1,SULF2,MAF1,GNAS,SPRY1,ATRX,UGT8,HUNK,THRSP,XPA,GPAM,CBS/CBSL,REC8,GLI1,POC1A,PAFAH1B3	51
Digestive System Development and Function, Gastrointestinal Disease, Organ Morphology, Organismal Development, Organismal Injury and Abnormalities	abnormal morphology of tongue	0.00517						ENTPD2,NGFR,FGFR2,CYP51A1	4
Cellular Function and Maintenance	endocytosis by kidney cell lines	0.00517						RUFY1,DLG1,CCR5,P2RX7	4
Carbohydrate Metabolism, Small Molecule Biochemistry	metabolism of proteoglycan	0.00517						APOE,COL2A1,GALNS,SULF2	4
Cancer, Organismal Injury and Abnormalities	progressive gastrointestinal stromal neoplasia	0.00517						FGFR3,FYN,DDR2,FGFR2	4
Cell Morphology, Nervous System Development and Function, Neurological Disease, Tissue Morphology	abnormal morphology of neurites	0.0052						ZNF423,APOE,GJA1,PMP22,PLP1,FA2H,S1PR1,ROBO2,Mt3,XPA,VCAN	11
Cell Morphology, Cellular Assembly and Organization, Cellular Function and Maintenance	extension of cellular protrusions	0.00526		0.12			0.385	FYN,APOE,CCR5,LAMA2,UNC5B,ADCY6,PLD1,SLAIN1,PITPNM1,S1PR1,GALNS,CD82,NOTCH1,PPP1R9A	14
Digestive System Development and Function	ingestion by rodents	0.00526		-0.466			-0.569	APOE,MAF1,CCR5,HOMER2,Neat1,ADCY6,SDC3,ODC1,ZNF423,ATP1B2,FADS2,NEDD4L,HSD11B1,ENHO	14
Cancer, Organismal Injury and Abnormalities, Renal and Urological Disease	renal cancer	0.00526						CCR5,SESN2,ABCG4,ATXN3,ZMAT5,SRSF6,THSD7A,LATS2,FGFR3,DDX5,PEX5L,KEAP1,NFE2L3,MLLT10,MITF,ANLN,LAMA2,PREX2,FGFR2,PTPN3,DISP2,SUSD5,PRKCD,PNP,NOTCH1,GSTP1,RNPEP,PHLPP1,SLC4A4,HIST1H1C,RPS6KA3,TCF12,NFKBIA,NFAT5,POFUT2,PCK2,KDM6A,PPP1R2,ROBO2,CYP51A1,CTXN3,PDE4DIP,GNAS,PPM1E,ATRX,TMC3,PYGB,FNIP1,CIB2,PIAS3,ZFP64,ATP1A2,DSCAM,NUDT17,CLU	55
Cancer, Organismal Injury and Abnormalities, Renal and Urological Disease	Renal Cancer and Tumors	0.00529						CCR5,SESN2,ABCG4,ATXN3,ZMAT5,SRSF6,THSD7A,LATS2,FGFR3,DDX5,PEX5L,GPR4,KEAP1,NFE2L3,MLLT10,MITF,ANLN,LAMA2,PREX2,FGFR2,PTPN3,DISP2,SUSD5,PRKCD,PNP,NOTCH1,GSTP1,RNPEP,PHLPP1,SLC4A4,HIST1H1C,RPS6KA3,TCF12,NFKBIA,NFAT5,POFUT2,PCK2,KDM6A,PPP1R2,ROBO2,CYP51A1,CTXN3,PDE4DIP,GNAS,PPM1E,ATRX,TMC3,PYGB,FNIP1,CIB2,PIAS3,ZFP64,ATP1A2,DSCAM,NUDT17,CLU	56
Cancer, Endocrine System Disorders, Organismal Injury and Abnormalities, Reproductive System Disease	ovarian cancer	0.00537						WRAP53,FOXO4,ATP8A1,QKI,GRM3,HIST1H2BD,RGCC,KLK6,RNF7,EEF1D,ODC1,FGFR3,ARHGEF40,ALDH1L1,CACNA1E,GPR4,ABR,KEAP1,MTHFD2,FCHO1,NFE2L3,MFSD2A,SON,PRKCQ,ANLN,LAMA2,FGFR2,IGFBP2,TOP1MT,PYGM,ABCA8,ADCYAP1R1,COL6A3,MYO9A,SNRNP25,ETV4,SSH3,LRP8,LRIG1,MTDH,NOTCH1,GSTP1,HSD11B1,RNPEP,SLC4A4,APOE,HIST1H1C,LRRC42,IQCB1,CAMK2N2,COL15A1,VCAN,NFAT5,PRIM1,PCK2,KDM6A,MCAM,OTUD7B,STRIP1,PSAT1,PARP16,GNAS,KLHL2,ATRX…	74
Gene Expression	activation of DNA endogenous promoter	0.00543		0.722			0.956	FOXO4,SS18,RGCC,CTNNBIP1,FGFR3,DDX5,OLIG2,ABLIM3,JARID2,Cdkn1c,NFE2L3,DLG1,PHIP,MLLT10,MITF,EID1,ZIC2,NRIP2,CREB3,MAD2L2,FGFR2,ELF1,IL33,TRAF6,ETV4,LRP8,SOX8,NFYC,TCEA2,RPS6KA1,MTDH,NOTCH1,KLF15,HIST1H1C,RPS6KA3,DDX17,TCF12,USP3,RITA1,OGT,NFKBIA,NFAT5,POLR2A,CTBP2,HEXIM1,OTUD7B,GNAS,EDNRB,HIPK3,ATRX,ZIC1,SMYD2,ZBTB1,FNIP1,SEMA4D,S1PR1,TLE4,GLI1,RPS14	59
Neurological Disease	demyelination of central nervous system	0.00546		-0.577			-0.512	CCR5,PRKCQ,PLP1,S1PR1,ASPA	5
Embryonic Development, Organ Development, Organismal Development, Renal and Urological System Development and Function, Tissue Development	development of metanephric bud	0.00548						CTNNBIP1,DLG1,SPRY1,FGFR2,ROBO2,ADAMTS16,GDF11	7
Cellular Assembly and Organization, Cellular Compromise	retraction of cellular protrusions	0.00548		1.746			1.886	RHOG,SEMA4D,SEMA3D,UNC5B,PITPNM1,PDPK1,GALNS	7
Cellular Development, Embryonic Development, Organismal Development	differentiation of multilineage progenitor cells	0.0056		-0.484			-0.318	S1PR3,OLIG2,S1PR1,FGFR2,OLIG1,NOTCH1	6
Cardiovascular Disease, Neurological Disease, Organismal Injury and Abnormalities	ischemic stroke	0.0056						SLC25A38,CST3,CKAP4,VSNL1,ADCY8,PLA2G7	6
Cancer	transformation of fibroblast cell lines	0.00564		-0.947			-0.697	EPS8,MITF,FGFR2,EEF1D,ODC1,IGFBP2,FGFR3,ST5,NFKBIA,RHOG,GPR4,CSF2RA,PRKCD,EIF3I,LRIG1,CLU	16
Endocrine System Development and Function	glucose tolerance	0.00571		0.451			0.561	KLF15,APOE,FOXO4,GNAS,PPP1R3C,SLC13A5,RPS6KA3,C8orf44-SGK3/SGK3,SDC3,GPAM,PLA2G4A,OGT,CACNA1E,ADCYAP1R1,PRKCD,HSD11B1,ENHO	17
Cancer, Endocrine System Disorders, Organismal Injury and Abnormalities, Reproductive System Disease	advanced ovarian tumor	0.00577						ABCA8,MCAM,RGCC,KLK6,FGFR2,LRP8,LRIG1,COL15A1,HSD11B1,VCAN	10
Cancer, Gastrointestinal Disease, Organismal Injury and Abnormalities	upper gastrointestinal tract cancer	0.00579						EPS8,ATP8A1,PLP1,QKI,GRM3,SCRN2,UNC5B,COL9A3,KLK6,PAQR6,PHACTR4,THSD7A,LATS2,WBSCR17,TRPC3,FGFR3,ARHGEF40,SEMA6D,CACNA1E,FGF12,JARID2,ZIC4,PLXNB3,ADAMTS16,G2E3,ANLN,SLC24A3,LAMA2,FGFR2,PREX2,PTPN3,HHIP,GRM7,ZNF423,TOP1MT,ABCA8,ADRA2A,COL6A3,SUSD5,ETV4,PRKCD,PCDHB6,FADS2,LRIG1,MTDH,NOTCH1,TAP2,VPS54,TNS1,ARHGEF10,GSTP1,TBC1D23,APOE,SLC46A1,CTHRC1,THSD1,COL15A1,DCDC2,TMEM63A,GPRC5B,CSF2RA,NGFR,MAL,…	95
Neurological Disease	dyskinesia	0.0058						APOE,CA2,GRIN2D,ENO3,RASA4,VCAN,DHCR7,RHOG,CYTH1,PPP1R2,FGF12,CYP51A1,PSAT1,SLC1A6,GJA1,PDE4DIP,Scd2,KCNIP1,PTPN3,NBEA,XPA,TRAF6,GPAM,PIAS3,PMP22,ADRA2A,ETV4,S1PR1,SLC1A2,VSNL1,CHI3L1,MTDH,SYNPR,CLU	34
Skeletal and Muscular System Development and Function	morphology of skeleton	0.00582						Cdkn1c,GJA1,NDRG2,RPS6KA3,COL2A1,FGFR2,FZD9,HHIP,GDF11,AKAP11,TRAF6,FGFR3,SH3PXD2B,ARSB,SULF2,NOTCH1,P2RX7,CYP51A1,PHLPP1	19
Cellular Development, Cellular Growth and Proliferation, Hair and Skin Development and Function, Organ Development, Tissue Development	proliferation of epidermal cells	0.00584		-0.13			-0.067	FYN,DDX5,CHGA,PRKCD,KLK6,FGFR2,RNF7,SRSF6,C8orf44-SGK3/SGK3,LRIG1,NOTCH1,CLU	12
Vitamin and Mineral Metabolism	quantity of vitamin	0.00584		-0.678			-0.669	APOE,SLC9A3R1,CD320,SLC46A1,FGFR2,TTPA,GSTO1	7
Cellular Development, Cellular Growth and Proliferation, Embryonic Development, Organ Development, Organismal Development, Reproductive System Development and Function, Tissue Development	formation of testicular cells	0.00588						ATRX,MAD2L2,UGT8,SOX8	4
Cell-mediated Immune Response, Cellular Development, Cellular Function and Maintenance, Cellular Growth and Proliferation, Embryonic Development, Hematological System Development and Function, Hematopoiesis, Lymphoid Tissue Structure and Development, Organ Development, Organismal Development, Tissue Development	development of natural killer T lymphocytes	0.00589						FYN,PRKCQ,NOTCH1	3
Cellular Development, Cellular Growth and Proliferation, Connective Tissue Development and Function, Hematological System Development and Function, Hematopoiesis, Lymphoid Tissue Structure and Development, Skeletal and Muscular System Development and Function, Tissue Development	osteoclastogenesis of bone-marrow-derived monocyte/macrophage precursor cells	0.00589						TRAF6,PIAS3,NFKBIA	3
Cell Morphology, Connective Tissue Development and Function	morphology of fibroblast cell lines	0.00593						FGFR3,ST5,FOXO4,FYN,RHOG,PRKCD,STARD13,PHLPP1	8
Cancer, Organismal Injury and Abnormalities, Renal and Urological Disease	renal cell cancer	0.00598						CCR5,SESN2,ABCG4,ATXN3,ZMAT5,THSD7A,LATS2,FGFR3,PEX5L,KEAP1,NFE2L3,MLLT10,MITF,ANLN,LAMA2,PREX2,FGFR2,PTPN3,DISP2,SUSD5,PRKCD,PNP,NOTCH1,GSTP1,PHLPP1,SLC4A4,HIST1H1C,RPS6KA3,TCF12,NFAT5,NFKBIA,POFUT2,KDM6A,PPP1R2,ROBO2,CTXN3,PDE4DIP,GNAS,PPM1E,ATRX,TMC3,PYGB,FNIP1,CIB2,PIAS3,ZFP64,ATP1A2,DSCAM,NUDT17,CLU	50
Neurological Disease	amyotrophic lateral sclerosis	0.00605						FGFR3,APOE,SLC1A6,ZFP64,ABCA8,ADRA2A,GRIN2D,ENO3,MCAM,NGFR,ARSG,MTHFD2,SLC1A2,CLU,AKAP11	15
Organismal Development, Respiratory Disease, Respiratory System Development and Function	abnormal morphology of snout	0.00605						GJA1,CBS/CBSL,DDR2,COL2A1,FGFR2,ARSB	6
Amino Acid Metabolism, Molecular Transport, Small Molecule Biochemistry	abnormal quantity of homocysteine	0.00611						APOE,CBS/CBSL	2
Dermatological Diseases and Conditions, Organismal Injury and Abnormalities	acanthosis nigricans	0.00611						FGFR3,FGFR2	2
Hematological System Development and Function, Immune Cell Trafficking, Inflammatory Response, Tissue Development	accumulation of monocyte-derived macrophages	0.00611						APOE,CBS/CBSL	2
Cell-To-Cell Signaling and Interaction, Hair and Skin Development and Function	cell-cell adhesion of epithelial cell lines	0.00611						OGT,KLK6	2
Tox Functions for My Projects->SCA3->Brain - 2017-02-25 11:24 AM
Categories	Diseases or Functions Annotation	p-Value	Predicted Activation State	Activation z-score		Notes	Bias-corrected z-score	Molecules	# Molecules
Liver Hyperplasia/Hyperproliferation	liver tumor	0.000101		0.277			0.232	PPP1R26,ABCG4,FAM208B,GPSM2,ODC1,PEX5L,CYTH1,KEAP1,ABLIM3,JARID2,HS3ST1,ADAMTS16,PHIP,SON,COMTD1,PRKCQ,FGFR2,PTPN3,GPT2,PLD1,SLC7A10,GRM7,ARPC1A,MRNIP,ABCF3,ANAPC5,VPS54,IQSEC3,APOE,CTHRC1,DDX17,ATP10B,LRCH3,OGT,CHDH,KDM6A,CYP51A1,MTSS1L,UTP20,TMC3,DIP2A,SMYD2,TMEM25,PDLIM2,CDH19,FAM155A,GPAM,PLA2G4A,TNS3,MOBP,ATP1A2,WRAP53,NDRG2,PDPK1,TRPC3,TST,CACNA1E,RHOG,GPR4,NBAS,PLEKHA7,SESN3,G2E3,ACSL6,LAM…	208
Liver Hyperplasia/Hyperproliferation	liver carcinoma	0.000226						PPP1R26,ABCG4,FAM208B,GPSM2,PEX5L,CYTH1,KEAP1,ABLIM3,JARID2,HS3ST1,ADAMTS16,PHIP,SON,COMTD1,PRKCQ,FGFR2,PTPN3,GPT2,PLD1,SLC7A10,GRM7,ARPC1A,MRNIP,ABCF3,ANAPC5,VPS54,IQSEC3,APOE,CTHRC1,DDX17,ATP10B,LRCH3,OGT,CHDH,KDM6A,CYP51A1,MTSS1L,UTP20,TMC3,DIP2A,SMYD2,TMEM25,PDLIM2,CDH19,FAM155A,GPAM,PLA2G4A,TNS3,MOBP,ATP1A2,WRAP53,NDRG2,TRPC3,TST,CACNA1E,RHOG,NBAS,PLEKHA7,SESN3,G2E3,ACSL6,LAMA2,OSBPL7,GDF11,…	195
Liver Hyperplasia/Hyperproliferation	liver cancer	0.000476						PPP1R26,ABCG4,FAM208B,GPSM2,PEX5L,CYTH1,KEAP1,ABLIM3,JARID2,HS3ST1,ADAMTS16,PHIP,SON,COMTD1,PRKCQ,FGFR2,PTPN3,GPT2,PLD1,SLC7A10,GRM7,ARPC1A,MRNIP,ABCF3,ANAPC5,VPS54,IQSEC3,APOE,CTHRC1,DDX17,ATP10B,LRCH3,OGT,CHDH,KDM6A,CYP51A1,MTSS1L,UTP20,TMC3,DIP2A,SMYD2,TMEM25,PDLIM2,CDH19,FAM155A,GPAM,PLA2G4A,TNS3,MOBP,ATP1A2,WRAP53,NDRG2,TRPC3,TST,CACNA1E,RHOG,NBAS,PLEKHA7,SESN3,G2E3,ACSL6,LAMA2,OSBPL7,GDF11,…	199
Nephrosis	nephrosis	0.00184						PDE8A,ZNF423,CA2,CST3,ATP1A2,IQCB1,CLU,GSTP1,DCDC2	9
Glomerular Injury	cortical renal glomerulopathies	0.00301						Cdkn1c,FYN,CLU	3
Cardiac Arteriopathy	coronary artery disease	0.0042						CA2,APOE,GJA1,SLC7A11,TKT,PLA2G7,GSTO1,PDE8A,SAMD12,CACNA1E,ADRA2A,NPR1,S1PR1,ANKRD29,LRP8,SEZ6L,SLC8A1,LRIG1,FADS1	19
Pulmonary Hypertension	pulmonary hypertensive arterial disease	0.0117						APOE,EDNRB,DDR2,CSF2RA,G6PC3	5
Pulmonary Hypertension	Pulmonary Hypertension	0.0134						PDE8A,CA2,APOE,EDNRB,ADRA2A,DDR2,CSF2RA,NPR1,G6PC3	9
Glutathione Depletion In Liver	conjugation of glutathione	0.0134						GSTM2,Gstt1,GSTP1	3
Cardiac Hypoplasia	hypoplasia of heart chamber	0.0146		-1.342			-1.603	WASF2,HEXIM1,SLC8A1,NOTCH1,CYP51A1	5
Cardiac Hypertrophy	hypertrophy of heart	0.0166		1.107			1.076	KLF15,CA2,APOE,CHGA,P2RX4,ADCY6,TRPC3,EEF1D,IL33,PLA2G4A,NFKBIA,ADRA2A,PRKCD,NPR1,JARID2,HEXIM1,CTSC,SLC8A1,COL9A2	19
Nephrosis	nephronophthisis	0.0175						ZNF423,IQCB1,DCDC2	3
Liver Failure	failure of liver	0.0217						CCR5,NBAS,SLC7A11,ADRA2A,PDPK1	5
Pulmonary Hypertension	Dursun syndrome	0.0254						G6PC3	1
Congenital Heart Anomaly	Frank-Ter Haar syndrome	0.0254						SH3PXD2B	1
Nephrosis	Senior-Loken syndrome 5	0.0254						IQCB1	1
Renal Hydronephrosis	bilateral hydronephrosis	0.0254						NFAT5	1
Cardiac Infarction	fatal myocardial infarction	0.0254						NGFR	1
Glomerular Injury	focal segmental glomerulosclerosis type 8	0.0254						ANLN	1
Liver Failure	infantile liver failure syndrome type 2	0.0254						NBAS	1
Glomerular Injury	lipoprotein glomerulopathy	0.0254						APOE	1
Nephrosis	nephronophthisis 14	0.0254						ZNF423	1
Nephrosis	nephronophthisis type 19	0.0254						DCDC2	1
Cardiac Proliferation	proliferation of proepicardial cells	0.0254						GJA1	1
Liver Damage, Liver Inflammation/Hepatitis	resistance to hepatitis C virus	0.0254						CCR5	1
Cardiac Arteriopathy	susceptibility to severe coronary artery disease	0.0254						APOE	1
Congenital Heart Anomaly	total anomalous pulmonary venous return	0.0254						SEMA3D	1
Cardiac Arrythmia	tachyarrhythmia	0.0358						GJA1,ADRA2A	2
Cardiac Arrythmia	persistent atrial fibrillation	0.0417						ATP1A2,SLC8A1	2
Hepatocellular Carcinoma, Liver Hyperplasia/Hyperproliferation	hepatocellular carcinoma	0.0418						CA2,VASH2,NDRG2,HIST1H2BD,RPS6KA3,VCAN,FGFR3,DDR2,KEAP1,STARD13,PITPNM1,ROBO2,ZNF638,SULF2,CACNA1G,MFSD2A,GNAS,EDNRB,ANLN,Scd2,FGFR2,HHIP,GSTO1,ATP1B3,IGDCC4,PLCB4,ABCA8,GLUL,CD82,NOTCH1,GLI1,FADS1	32
Liver Hyperplasia/Hyperproliferation	symptomatic stage iodine-refractory liver metastasis	0.0478						FGFR3,FGFR2	2
Cardiac Arteriopathy	atherosclerosis of coronary artery	0.0501						APOE	1
Liver Hyperplasia/Hyperproliferation	beta-catenin activating mutation positive hepatocellular adenoma	0.0501						GLUL	1
Renal Damage	drug toxicity-related nephropathy	0.0501						SLC7A11	1
Liver Necrosis/Cell Death	focal necrosis of liver cells	0.0501						APOE	1
Renal Hyperplasia/Hyperproliferation	hyperplasia of distal tubule	0.0501						HSD11B1	1
Renal Hypertrophy	hypertrophy of distal tubule	0.0501						HSD11B1	1
Increased Levels of Potassium	increased efflux of K+	0.0501						P2RX7	1
Glomerular Injury	lipidosis of renal glomerulus	0.0501						APOE	1
Liver Inflammation/Hepatitis, Liver Necrosis/Cell Death	necrotizing inflammation of liver	0.0501						APOE	1
Cardiac Stress Response	oxidative stress response of cardiomyocytes	0.0501						IL33	1
Renal Hydronephrosis	progressive hydronephrosis	0.0501						NFAT5	1
Liver Fibrosis	severe hepatic fibrosis	0.0501						IL33	1
Cardiac Hypoplasia	hypoplasia of heart ventricle	0.0507		-1			-1.233	WASF2,SLC8A1,NOTCH1,CYP51A1	4
Cardiac Arteriopathy	abnormal morphology of coronary artery	0.0542						APOE,GJA1	2
Glomerular Injury, Renal Hypertrophy	hypertrophy of mesangial cells	0.0542						GJA1,PDPK1	2
Liver Hyperplasia/Hyperproliferation	liver adenoma	0.0544						GNAS,GLUL,XPA	3
Liver Inflammation/Hepatitis	alcoholic hepatitis	0.0584						PDE8A,SLC7A11,GSTP1	3
Cardiac Inflammation	experimental autoimmune myocarditis	0.061						CCR5,PRKCQ	2
Liver Hyperplasia/Hyperproliferation	undifferentiated (embryonal) sarcoma	0.061						FGFR3,FGFR2	2
Glomerular Injury	abnormal morphology of renal glomerulus	0.0636						Cdkn1c,APOE,FYN,GPR4,TNS1,CLU	6
Glomerular Injury	focal segmental glomerulosclerosis	0.0669						KLF15,ANLN,CLU	3
Cardiac Hypoplasia	hypoplasia of trabeculae carne	0.0669						WASF2,SLC8A1,NOTCH1	3
Kidney Failure	acute renal failure	0.0724						SLC7A11,ADRA2A,NPR1,GSTP1	4
Heart Failure	cardiorenal syndrome	0.0742						NPR1	1
Glomerular Injury, Renal Hypoplasia	hypoplasia of mesangial cells	0.0742						GPR4	1
Congenital Heart Anomaly	hypoplastic left heart syndrome	0.0742						GJA1	1
Pulmonary Hypertension	persistent fetal circulation syndrome	0.0742						EDNRB	1
Cardiac Dilation	dilation of heart	0.0752						GNAS,NPR1	2
Liver Hyperplasia/Hyperproliferation	progressive liver metastasis	0.0752						FGFR3,FGFR2	2
Heart Failure	chronic heart failure	0.0758						CA2,ADRA2A,NPR1	3
Renal Necrosis/Cell Death	apoptosis of kidney cells	0.0848		1			1.023	APOE,NFKBIA,PRKCD,UNC5B,CLU	5
Cardiac Hypertrophy	ventricular hypertrophy	0.0857		0.896			0.794	KLF15,APOE,PLA2G4A,CHGA,ADRA2A,HEXIM1,SLC8A1	7
Liver Steatosis	hepatic steatosis	0.0875		1.857			1.7	MFSD2A,MAF1,APOE,CCR5,RGCC,CTHRC1,FGFR2,XPA,PDE8A,CBS/CBSL,HSD11B1,CLU,GSTP1,ENHO	14
Renal Dysplasia	dysplasia of kidney	0.0904						Cdkn1c,CLU	2
Cardiac Fibrosis	fibrosis of myocardium	0.0904						GNAS,NPR1	2
Nephrosis	minimal change nephrotic syndrome	0.0904						CST3,CLU	2
Cardiac Inflammation	myocarditis	0.0952						CCR5,PRKCQ,CLU	3
Glomerular Injury	bleeding of renal glomerulus	0.0977						GPR4	1
Liver Regeneration	delay in regeneration of liver	0.0977						SULF2	1
Cardiac Enlargement	enlargement of left ventricle	0.0977						P2RX7	1
Cardiac Hypoplasia	hypoplasia of atrium	0.0977						HEXIM1	1
Liver Hyperplasia/Hyperproliferation	inflammatory hepatocellular adenoma	0.0977						GNAS	1
Liver Cholestasis	lipopolysaccharide hepatocellular cholestasis	0.0977						GJA1	1
Heart Failure	mild to moderate stage heart failure	0.0977						ATP1A2	1
Glomerular Injury	progressive glomerulopathy	0.0977						CLU	1
Liver Hyperplasia/Hyperproliferation	resectable liver metastasis	0.0977						TOP1MT	1
Liver Proliferation	proliferation of liver cells	0.1		-1.179			-1.084	TOP1MT,NFKBIA,EDNRB,NGFR,FGFR2,SULF2,GLI1,XPA,ODC1	9
Cardiac Output	cardiac output	0.1						APOE,EDNRB,ARSB	3
Cardiac Dysfunction, Cardiac Hypertrophy	hypertrophy of left ventricle	0.104		0			-0.159	KLF15,CHGA,ADRA2A,HEXIM1,SLC8A1	5
Congenital Heart Anomaly	atrial septal defect	0.106						GJA1,ADRA2A,SEMA3D	3
Cardiac Inflammation	carditis	0.106		0.152			0.083	IL33,CCR5,PRKCQ,CLU	4
Liver Hyperplasia/Hyperproliferation	liver metastasis	0.106						FGFR3,TOP1MT,FGFR2,IGFBP2	4
Renal Necrosis/Cell Death	apoptosis of renal tubular epithelial cells	0.106						UNC5B,CLU	2
Renal Degeneration	degeneration of kidney	0.106						TNS1,CLU	2
Liver Fibrosis	fibrosis of liver	0.108		-0.506			-0.567	IL33,APOE,CCR5,CBS/CBSL,CST3,FGFR2,GSTP1	7
Glomerular Injury, Renal Necrosis/Cell Death	apoptosis of mesangial cells	0.115						APOE,NFKBIA	2
Renal Inflammation, Renal Nephritis	interstitial nephritis	0.115						NFAT5,TNS1	2
Glomerular Injury, Renal Necrosis/Cell Death	apoptosis of glomerular cells	0.116						APOE,NFKBIA,PRKCD	3
Pulmonary Hypertension	chronic thromboembolic pulmonary hypertension	0.121						EDNRB	1
Decreased Levels of Albumin	decreased localization of albumin	0.121						COL2A1	1
Liver Damage	drug-induced hepatotoxicity	0.121						SLC7A11	1
Cardiac Damage, Cardiac Degeneration	injury of cardiomyocytes	0.121						PIM3	1
Glomerular Injury, Renal Thrombosis	thrombosis of glomerular capillary	0.121						APOE	1
Liver Hyperplasia/Hyperproliferation	unresectable liver metastasis	0.121						TOP1MT	1
Renal Hypertrophy	hypertrophy of kidney	0.122						GJA1,PDPK1,HSD11B1	3
Glomerular Injury	abnormal morphology of glomerular capillary	0.123						APOE,CLU	2
Cardiac Dysfunction, Cardiac Fibrosis	fibrosis of left ventricle	0.123						ADRA2A,HEXIM1	2
Renal Hyperplasia/Hyperproliferation	hyperplasia of kidney	0.14						CLU,HSD11B1	2
Cardiac Hypertrophy	hypertrophy of right ventricle	0.14						APOE,PLA2G4A	2
Heart Failure	end stage heart failure	0.143						SLC8A1	1
Increased Levels of Albumin	increased excretion of albumin	0.143						P2RX7	1
Liver Cholestasis	obstructive cholestasis	0.143						GJA1	1
Renal Transformation	transformation of kidney cells	0.143						NOTCH1	1
Liver Proliferation	proliferation of hepatocytes	0.145		-0.895			-0.817	TOP1MT,NFKBIA,NGFR,FGFR2,SULF2,GLI1,ODC1	7
Glomerular Injury	abnormal morphology of mesangial matrix	0.149						APOE,CLU	2
Liver Hyperplasia/Hyperproliferation	proliferation of liver cancer cells	0.149						NOTCH1,ODC1	2
Heart Failure	acute decompensated heart failure	0.165						NPR1	1
Biliary Hyperplasia, Liver Cholestasis	flow of bile	0.165						SLC9A3R1	1
Increased Levels of ALT	increased release of ALT	0.165						PRKCD	1
Heart Failure	failure of heart	0.169		1.165			1.016	KLF15,PDE8A,CA2,SLC7A11,ADRA2A,CST3,NPR1,GRIN2D,ATP1A2,PDPK1,SLC8A1,CYP51A1	12
Cardiac Hypertrophy	hypertrophy of heart cells	0.171						IL33,CA2,NFKBIA,ADCY6,CTSC,COL9A2,EEF1D	7
Cardiac Arteriopathy	early-onset premature coronary artery disease	0.186						LRP8	1
Cardiac Hypertrophy	hypertrophy of cardiac muscle	0.188		0.243			0.293	IL33,CA2,NFKBIA,P2RX4,NPR1,ADCY6,JARID2	7
Cardiac Arrythmia, Tachycardia	supraventricular tachycardia	0.195						ADRA2A,ATP1A2	2
Renal Necrosis/Cell Death	necrosis of renal tubule	0.202						UNC5B,SLC8A1,CLU	3
Cardiac Congestive Cardiac Failure, Heart Failure	congestive heart failure	0.202						PDE8A,CA2,SLC7A11,ADRA2A,NPR1,ATP1A2	6
Cardiac Necrosis/Cell Death	apoptosis of ventricular myocytes	0.204						PRKCD,SLC8A1	2
Liver Failure	acute liver failure	0.207						SLC7A11	1
Renal Dilation	dilation of kidney	0.207						EDNRB	1
Liver Inflammation/Hepatitis	fulminant hepatitis	0.207						CCR5	1
Increased Levels of Hematocrit	increased hematocrit of organism	0.222		-1.982			-1.733	SLC4A4,APOE,NPR1,TSPAN33	4
Cardiac Dysfunction, Heart Failure	diastolic heart failure	0.227						NPR1	1
Glomerular Injury	glomerulosclerosis	0.234		0			-0.139	KLF15,APOE,FYN,ANLN,TNS1,CLU	6
Glomerular Injury, Renal Fibrosis	fibrosis of renal glomerulus	0.246						CLU	1
Liver Cirrhosis	primary biliary cirrhosis	0.254						FGFR3,DLG1,CSF2RA,NOTCH1	4
Renal Necrosis/Cell Death	cell death of kidney cells	0.258		0.398			0.497	FYN,APOE,UNC5B,DDX17,TCF12,PLA2G4A,SLC25A38,PMP22,NFKBIA,RHOG,PRKCD,P2RX7,GSTP1,CLU	14
Congenital Heart Anomaly	syndromic congenital heart disease	0.26						SH3PXD2B,ADRA2A	2
Cardiac Infarction	myocardial infarction	0.27		0.2			0.129	APOE,ADRA2A,SESN2,NPR1,NGFR,LRP8,CAMK2N2,CLU	8
Bradycardia, Cardiac Arrythmia	bradycardia	0.279						GJA1,ADRA2A	2
Cardiac Damage	injury of heart	0.279						PIM3,CAMK2N2	2
Increased Levels of Creatinine	increased clearance of creatinine	0.302						EDNRB	1
Cardiac Fibrosis	fibrosis of heart	0.305		-0.066			-0.171	KLF15,APOE,GNAS,ADRA2A,NPR1,HEXIM1,SLC8A1	7
Cardiac Arrythmia	atrial flutter	0.317						ADRA2A,ATP1A2	2
Renal Damage, Renal Tubule Injury	damage of tubulointerstitium	0.32						APOE	1
Increased Levels of AST	increased localization of AST	0.32						APOE	1
Renal Atrophy	atrophy of kidney	0.326						NFAT5,EDNRB	2
Increased Levels of LDH	increased release of LDH	0.337						KLK6	1
Glutathione Depletion In Liver	quantity of glutathione in liver	0.337						TOP1MT	1
Liver Inflammation/Hepatitis	severe alcoholic hepatitis	0.337						PDE8A	1
Liver Cirrhosis	Cirrhosis	0.342						FGFR3,PDE8A,DLG1,CCR5,EDNRB,ADRA2A,CSF2RA,GRIN2D,NOTCH1,GSTP1	10
Liver Regeneration	regeneration of liver	0.352						TOP1MT,SULF2,ODC1	3
Congenital Heart Anomaly	Shprintzen syndrome	0.354						ADRA2A	1
Increased Levels of Potassium	increased excretion of K+	0.354						ADCY6	1
Renal Necrosis/Cell Death	cell viability of kidney cell lines	0.359						NFKBIA,NFAT5,P2RX7	3
Cardiac Dysfunction	dysfunction of heart	0.361		0.391			0.291	KLF15,APOE,CHGA,ADRA2A,HEXIM1,SLC8A1	6
Cardiac Inflammation	pericarditis	0.37						IL33	1
Liver Proliferation	quantity of hepatocytes	0.37						CBS/CBSL	1
Kidney Failure, Liver Failure	hepatorenal syndrome	0.386						ADRA2A	1
Liver Enlargement, Liver Hepatomegaly	hepatomegaly	0.387						TRAF6,CBS/CBSL,FADS2	3
Renal Necrosis/Cell Death	cell death of kidney cell lines	0.391		-0.215			-0.106	PLA2G4A,FYN,PMP22,SLC25A38,NFKBIA,RHOG,UNC5B,DDX17,P2RX7,GSTP1,TCF12	11
Liver Inflammation/Hepatitis	acute hepatitis	0.402						CCR5	1
Liver Hyperbilirubinemia	hyperbilirubinemia	0.402						GSTP1	1
Glomerular Injury, Renal Hyperplasia/Hyperproliferation	hyperplasia of mesangial cells	0.402						CLU	1
Congenital Heart Anomaly	heart septal defect	0.403						GJA1,ADRA2A,SEMA3D,CYP51A1	4
Renal Hypoplasia	hypoplasia of kidney	0.409						DLG1,GPR4	2
Renal Hydronephrosis	hydronephrosis	0.414						DLG1,NFAT5,CLU	3
Liver Necrosis/Cell Death	apoptosis of hepatic stellate cells	0.417						NGFR	1
Increased Levels of ALT	increased localization of ALT	0.417						APOE	1
Pulmonary Hypertension	primary pulmonary hypertension	0.417						CSF2RA	1
Congenital Heart Anomaly	atrioventricular septal defect and common atrioventricular junction	0.432						GJA1	1
Cardiac Arrythmia	cardiac fibrillation	0.433						ADRA2A,ATP1A2,SLC8A1,CHI3L1,P2RX7	5
Liver Fibrosis	migration of hepatic stellate cells	0.446						CCR5	1
Renal Damage	nephrotoxicity	0.448						SLC7A11,ODC1,GSTP1	3
Heart Failure	cardiorespiratory arrest	0.461						GRIN2D	1
Renal Dysfunction	dysfunction of kidney	0.461						SLC8A1	1
Cardiac Arrythmia, Tachycardia	tachycardia	0.468						ADRA2A,ATP1A2,SLC8A1	3
Cardiac Arrythmia	ventricular fibrillation	0.469						ADRA2A,P2RX7	2
Renal Inflammation, Renal Nephritis	membranous glomerulonephritis	0.474						CLU	1
Cardiac Pulmonary Embolism	pulmonary embolism	0.474						SLC7A11	1
Cardiac Arrythmia	arrhythmia of heart ventricle	0.481						ADRA2A,SLC8A1,P2RX7	3
Increased Levels of Red Blood Cells	increased quantity of red blood cells	0.481						JARID2,TSPAN33,SLC8A1	3
Renal Damage	damage of kidney	0.487						APOE,UNC5B,RGCC,SLC8A1	4
Cardiac Arrythmia, Tachycardia	paroxysmal supraventricular tachycardia	0.488						ADRA2A	1
Glomerular Injury, Renal Necrosis/Cell Death	apoptosis of podocytes	0.501						PRKCD	1
Cardiac Fibrosis	interstitial fibrosis of heart	0.501						NPR1	1
Hepatocellular Carcinoma, Liver Hyperplasia/Hyperproliferation	tumorigenesis of hepatocellular carcinoma	0.513						VCAN	1
Cardiac Arrythmia	atrial fibrillation	0.514						ADRA2A,ATP1A2,SLC8A1,CHI3L1	4
Cardiac Dilation	dilation of left ventricle	0.526						KLF15	1
Congenital Heart Anomaly	congenital heart disease	0.534						GJA1,SH3PXD2B,WASF2,ADRA2A,SEMA3D,NOTCH1,CYP51A1	7
Cardiac Hypertrophy	hypertrophy of cardiomyocytes	0.536						IL33,CA2,NFKBIA,ADCY6	4
Renal Damage	reperfusion injury of kidney	0.538						UNC5B	1
Liver Hyperplasia/Hyperproliferation	incidence of liver tumor	0.541						NDRG2,XPA	2
Increased Levels of Alkaline Phosphatase	increased activation of alkaline phosphatase	0.549						GLI1,NOTCH1	2
Liver Cholestasis	intrahepatic cholestasis	0.549						GJA1,TAP2	2
Congenital Heart Anomaly	failure of heart looping	0.561						WASF2	1
Cardiac Arrythmia, Tachycardia	ventricular tachycardia	0.571						ADRA2A,SLC8A1	2
Renal Inflammation, Renal Nephritis	Nephritis	1	Decreased	-2			-2.135	PDE8A,FYN,NFKBIA,NFAT5,PRKCD,TNS1,CLU	7
Cardiac Arrythmia	arrhythmia	1						GJA1,ADRA2A,ATP1A2,SLC8A1,CHI3L1,P2RX7	6
Liver Necrosis/Cell Death	cell death of hepatocytes	1						IL33,NFKBIA,CBS/CBSL,NGFR	4
Liver Damage, Liver Inflammation/Hepatitis	chronic hepatitis	1						CCR5,DDX5,CSF2RA	3
Liver Cirrhosis	cirrhosis of liver	1						FGFR3,DLG1,CSF2RA,GRIN2D,NOTCH1	5
Liver Damage	damage of liver	1		0.842			0.841	APOE,CCR5,DDX5,DDR2,CSF2RA,KEAP1,P2RX7,GSTP1	8
Liver Damage, Liver Inflammation/Hepatitis	hepatitis C	1						CCR5,DDX5	2
Cardiac Inflammation	inflammation of heart	1						CLU	1
Regulator Effects for My Projects->SCA3->Brain - 2017-02-25 11:24 AM
Consistency Score	Regulator Total	Regulators	Target Total	Target Molecules in Dataset		Disease & Function Total	Diseases & Functions	Known Regulator-Disease/Function Relationships
0.577	1	ADRB	3	CYP51A1,NFKBIA,SLC7A11		1	advanced malignant tumor	0% (0/1)
0.408	2	INSIG1,LMNB1	6	APOE,CYP51A1,DHCR7,GJA1,GPAM,Scd2		1	Movement Disorders	0% (0/2)
-10.253	1	AR	8	EDNRB,FGFR2,GJA1,GSTP1,LRIG1,NOTCH1,SLC7A11,VCAN		1	advanced malignant tumor	100% (1/1)
-16.499	1	AR	18	Cdkn1c,DHCR7,EDNRB,FGFR2,GJA1,GSTP1,LRIG1,MAD2L2,NGFR,NOTCH1,ODC1,PIAS3,PIGA,PRKCD,S1PR3,SLC7A11,VCAN,VSNL1		1	cell death	100% (1/1)
-22.01	1	AR	11	FGFR2,GJA1,LRIG1,NGFR,NOTCH1,ODC1,PIAS3,PRKCD,S1PR3,SLC7A11,VCAN		1	cell proliferation of tumor cell lines	100% (1/1)
Networks for My Projects->SCA3->Brain - 2017-02-25 11:24 AM
ID	Molecules in Network	Score	Focus Molecules	Top Diseases and Functions
1	ADAMTS16,ANAPC5,ANKRD13D,ANLN,ARRDC2,CCP110,CLDN11,Cg,DDX17,DHCR7,DUSP15,FSH,FYN,GDF11,GGCT,IDI1,LATS2,NBEA,NDE1,NOTCH1,PEX5L,PLEKHA7,PTBP3,RPL39,SDC3,SLC4A4,SNX8,ST5,TBKBP1,TCF12,TMEM25,TSPAN33,Ubiquitin,WASHC2A/WASHC2C,ZNF423	52	32	Nervous System Development and Function, Organ Morphology, Organismal Development
2	7S NGF,AP3B1,CARHSP1,CD82,CREB3,DOCK7,FA2H,FAM213B,KIF19,LRCH3,NBAS,NFE2L3,NFkB (complex),NMRAL1,NRIP3,OTUD7B,PDPK1,PI3K (family),PIAS3,PIM3,PLCD4,Pka catalytic subunit,Ppp2c,RNF7,RPS6KA,RPS6KA1,RPS6KA3,Rsk,SCLY,SFT2D2,STRIP1,TSPAN2,USE1,VSNL1,ZFP64	43	28	Cell Morphology, Inflammatory Response, Tissue Morphology
3	14-3-3,ATL2,ATL3,CA2,CKAP4,DDX5,HEXIM1,HIST1H1C,Holo RNA polymerase II,IGFBP2,Importin alpha,NELFB,OGT,POLR2A,QKI,RNA polymerase II,RNF144A,RPS10,RPS14,RPS24,Ribosomal 40s subunit,Rnr,SMYD2,SON,SRPK3,SRSF4,SRSF6,TAP2,TCEA2,TMEM161A,TONSL,VASH2,Vegf,XPA,ZBTB1	42	28	RNA Post-Transcriptional Modification, DNA Replication, Recombination, and Repair, Cellular Assembly and Organization
4	ABHD3,ARSB,ARSG,ATP1A2,ATP1B2,ATP1B3,Aryl Sulfatase,CTPS2,ELF1,EMC7,ENPP6,ERK1/2,FADS1,FADS2,FOXO4,HOMER2,ITPR,JAM3,LRP8,MLLT10,Na-k-atpase,OLIG1,OLIG2,PPP1R9A,Presenilin,RASD1,SHD,SOX8,SS18,SULF2,SUMF1,Scd2,Secretase gamma,TCF,stearoyl-CoA 9-desaturase	41	27	Cellular Function and Maintenance, Small Molecule Biochemistry, Molecular Transport
5	ATXN3,Alpha tubulin,Beta Tubulin,CDC42EP4,COMTD1,CYTH1,Cdkn1c,DCDC2,Dynein,ENO3,EPN2,ERK,FGFR3,GNG12,HIP1R,KCTD5,KDM6A,KLC4,LAMTOR3,LGI4,Lfa-1,MAL,MIF4GD,MTDH,NGFR,PARP16,PDE4DIP,PLXNA3,PMP22,TRAF,TUBA1B,WASF2,growth factor receptor,phosphatidylinositol-4,5-bisphosphate 3-kinase,tubulin (complex)	39	26	Nervous System Development and Function, Cellular Development, Cellular Growth and Proliferation
6	2810032G03Rik,AMPK,CBS/CBSL,CLU,CSAD,DDX25,DSCAM,FAM129B,FNIP1,GST,GSTM2,GSTO1,GSTP1,Gstt1,Gstt3,HIPK3,Jnk,KEAP1,KLHL2,KLK6,Ldh (complex),Mt3,Nos,PAQR7,PARP,SESN2,SLC7A11,THRSP,TNNI1,WDR1,ZIC1,ZIC2,cytochrome C,glutathione peroxidase,glutathione transferase	39	26	Drug Metabolism, Protein Synthesis, Glutathione Depletion In Liver
7	ANKRD13A,ARRDC3,ASPG,BBX,C8orf44-SGK3/SGK3,Dynamin,EHD1,ENaC,ETV4,Erm,FGF12,Fcer1,Fgf,HAUS8,MCAM,MITF,MTHFD2,NEDD4L,P2RX7,PAFAH1B3,PI3K (complex),PIGA,PLA2,PLA2G4A,PLA2G7,PLC gamma,Ptk,QDPR,RGCC,SH3PXD2B,SPRY1,TMC6,TNS1,UNC119,chymotrypsin	36	25	Lipid Metabolism, Small Molecule Biochemistry, Cell Death and Survival
8	ABCG4,Akt,CSF2RA,CYP51A1,Dlg,GPAM,HDL,HDL-cholesterol,HSD11B1,JINK1/2,KIF13B,MSMO1,N-cor,NCOR-LXR-Oxysterol-RXR-9 cis RA,NDRG2,NRIP2,Neat1,Nr1h,PCK2,PCOLCE2,PEPCK,PHIP,PREX2,PRKAA,Rxr,SAA,SEMA3D,SEMA6D,SERPIND1,SLC8A1,STARD13,Sphk,TKT,UGT8,histone deacetylase	28	21	Protein Synthesis, Cardiovascular Disease, Cardiovascular System Development and Function
9	ADCY,ADCY6,ADCY8,ADRB,CAMK2N2,CTHRC1,CTNNBIP1,CaMKII,Calcineurin protein(s),Collagen Alpha1,DLG1,Frizzled,GPSM2,GRIN2D,Gi-coupled receptor,MPP7,MVD,NFAT (complex),NPR1,PHKG1,PHLPP1,PLCB4,PPP1R3C,PYGB,PYGM,Pkc(s),Plc beta,Pp2b,SLC1A2,SLC6A9,SLC9A3R1,TRPC3,TSH,glycogen phosphorylase,phosphorylase	28	21	Carbohydrate Metabolism, Cell-To-Cell Signaling and Interaction, Cellular Assembly and Organization
10	ABR,ALT,ANKRD12,Alp,Ap1,CAPN5,CLMN,Creb,Cyclin A,EEF1D,EID1,FGFR2,G protein alphai,GJA1,GLI1,GPT2,HHIP,HMGCS1,JARID2,KIFC3,NFYC,NMDA Receptor,PDGF BB,PITPNM1,PRKCD,Patched,Rac,Ras,Rb,Rian,SESN3,Sapk,TMEM63A,ZNF106,calpain	28	21	Connective Tissue Development and Function, Embryonic Development, Organismal Development
11	ARPC1A,ARPC1B,Acot1,Alpha Actinin,Alpha catenin,Arp2/3,COL15A1,COL2A1,COL6A3,COL9A2,COL9A3,Collagen type I,Collagen type IV,Collagen type ix,Collagen(s),DDR2,Growth hormone,Integrin,KLF15,LAMA2,LDL-cholesterol,LRIG1,Laminin,MAP4K4,MMP15,Mmp,NFAT5,P38 MAPK,PDLIM2,PSAT1,SMOC1,ST3GAL4,Tgf beta,collagen,trypsin	24	19	Connective Tissue Disorders, Organismal Injury and Abnormalities, Cancer
12	2810468N07Rik,ABCF3,ACVR1,AJUBA,ALDH1L1,AP4B1,CD320,CDC42EP2,CDC42EP3,CHI3L1,ETNK2,FOXRED1,FSTL1,GJB2,HIRIP3,HNF4A,IL1RAP,LARP4,LARS2,MKRN1,PEG10,POC1A,RAB30,RIOK1,RITA1,SLC25A18,SUSD5,TBC1D23,TCF12,TDRD3,TGFBR,TGFBR2,TGFBRAP1,TP53RK,TPRKB	23	18	Embryonic Development, Organismal Development, Skeletal and Muscular Disorders
13	CA2,CLCN3,DNAJC1,FAM57A,GRID2IP,HSD17B12,ID4,IPO4,Integrin alpha 3 beta 1,KCND3,KCNIP1,KCNIP2,L3MBTL1,MAL,OGN,OSBPL7,PAQR7,RAB31,RPN2,SEMA3A,SFXN5,SLC24A3,SLC3A2,SLC7A10,SLC7A8,SRC,TCTN3,TLCD1,TMEM245,TNS3,TTC39A,UGT8,ZMAT5,beta-estradiol,mir-23	23	18	Amino Acid Metabolism, Molecular Transport, Small Molecule Biochemistry
14	ATRX,CACNA1E,CACNA1G,CACNG5,CHGA,Calcineurin A,Ck2,Cofilin,EYA4,F Actin,GNAS,KCNJ16,MAP2K1/2,MOBP,Mlc,NUDT14,PAICS,PDE8A,PP1 protein complex group,PP1/PP2A,PP2A,PPP1R14C,PPP1R2,PPP2R2A,Pde,Pdgf (complex),Pka,Proinsulin,Rock,SEMA4D,SSH3,SYNPR,TNS3,cacn,phosphatase	21	19	Cell-To-Cell Signaling and Interaction, Drug Metabolism, Molecular Transport
15	20s proteasome,26s Proteasome,APOE,CABP7,CTBP2,Calmodulin,HISTONE,Hdac,Hsp70,Hsp90,IFN Beta,IL12 (complex),IQCB1,Ifn,IgG,IgG1,Igm,Immunoglobulin,Interferon alpha,JAK,KCTD3,KDM4A,MID1IP1,NFKBIA,PCMTD1,PNP,PPL,PRIM1,PSMB10,ROBO2,SCRN2,SERTAD2,STAT5a/b,TRIL,ZNF638	21	18	Tissue Morphology, Cell Morphology, Lipid Metabolism
16	ANKRD13A,API5,ARHGEF40,BCAP29,BCL2,C1orf198,CHST3,CLIC1,ELAVL1,EWSR1,FAM114A2,FAM45A,FOS,GALNT1,GOLIM4,HS3ST1,KCNK13,KIAA0907,KLF3,MLH1,NDUFB8,NTF4,NTRK1,OCRL,PPM1E,RNF122,RNPEP,SHISA6,TES,TMEM123,TMEM256,TONSL,TPRG1L,UBL3,WDFY1	21	17	Cell Death and Survival, Nervous System Development and Function, Tissue Morphology
17	AIM1,ARPC5L,COPS9,CUL3,DIP2A,DLG4,EED,ESR2,FAM208B,FAM20A,FAM214B,Fbxw21 (includes others),GLMN,GP9,GRPR,HTR1B,MAF1,MAPK1,MEMO1,NTF4,OLIG2,PAQR6,PLXDC1,PPP1R26,PTPN3,PTPN7,SEMA4F,SEMA4G,SNX22,SNX8,TTC27,UTP20,VMAC,ZIC5,dopamine	21	17	Dermatological Diseases and Conditions, Organismal Injury and Abnormalities, Behavior
18	ADCYAP1R1,ADRA2A,CCR5,EDNRB,ENTPD2,FNBP1,FZD1,FZD9,Focal adhesion kinase,G protein,GLUL,GPR153,GPR37L1,GPR4,GPRC5B,GRM3,GRM7,Gpcr,Gsk3,IL12 (family),MTORC1,Nfat (family),PLC,Pdgfr,Pld,Pro-inflammatory Cytokine,RHOG,Ras homolog,S1PR1,S1PR3,SRC (family),Sfk,Shc,chemokine,p85 (pik3r)	19	18	Cellular Movement, Cell Signaling, Nucleic Acid Metabolism
19	ANKRD13A,CHI3L1,CISD3,CYB5R1,DMD,FBXO44,FZD5,IL25,IL31,IL5,KIAA1147,MYO9B,N-arachidonoyl-dopamine,PHKG1,PRTN3,RGS2,SERPINB1,SIRT3,SLAIN1,SLC14A1,SLU7,ST3GAL6,TBKBP1,TMEM176B,TMEM59L,TNF,TNIP2,TSPAN15,TST,UBC,Ube3,WBSCR17,XPO1,ganglioside GT1,inosine	17	15	Organismal Development, Cellular Compromise, Organismal Injury and Abnormalities
20	ADAMTS13,ADAMTS6,AES,AKAP8L,ALDOC,ATN1,ATP2A3,CA2,COPRS,ESR1,FUS,HIST1H2AD,HIST1H2BF,HIST2H2AA3/HIST2H2AA4,LRRC42,MACROD1,MTSS1L,NEK4,NREP,NUDT22,PCDHB6,POFUT2,POU4F2,PRR12,RPL36AL,RPN2,SIX3,SIX6,SLC1A4,SSPO,TCF/LEF,TLE4,TTC28,UGT8,WHRN	17	15	Embryonic Development, Nervous System Development and Function, Organ Development
21	ABLIM3,ACSL6,ANKRD29,ATP8A1,BDNF,CHDH,CHST3,DNAJB5,DRD5,ENTPD2,FNIP1,G2E3,GALNS,HAS3,HSP90AA1,IFNG,ITIH3,KCNA6,KIDINS220,LGALS9B,LST1,MAL,METRNL,NTF4,PPARGC1A,S100A8,SLC40A1,SLC46A1,SOD2,STAB2,TNFAIP6,TNR,Tni,VCAN,phosphatidylserine	17	15	Cell Morphology, Nervous System Development and Function, Organ Morphology
22	ADCYAP1,AI987944 (includes others),CIB2,Cdkn1c,EGR3,FNIP1,GAS1,GAS7,GLIS2,GPC3,HTATIP2,IFI44,IFNB1,IL4I1,KIAA1161,L-dopa,LMNA,MFSD2A,NAPRT,NELFE,NOCT,NPC2,P2RY2,SEZ6L,SLC22A23,SPARC,SYDE2,SYNE1,TCIRG1,TMEM106C,TMEM141,TRIM67,TTYH1,Tpm2,ZFP64	17	15	Neurological Disease, Developmental Disorder, Skeletal and Muscular Disorders
23	ABCA8,ANO1,ASPA,Abca8a,D-glucose,ENHO,EXOC3L4,FAM161B,FOXO6,G6PC3,GNPAT,HUNK,INO80D,Ins1,MYC,MYH9,MYO9A,NDUFB9,NPHP4,PDP1,PLIN4,PPI,RSPO1,SARDH,SCAMP1,SEPHS2,SIK3,SLC13A5,SLC25A10,TES,TRMT10A,TTC27,YY1,acetate,glucose-6-phosphatase	17	15	Endocrine System Development and Function, Energy Production, Lipid Metabolism
24	ALDH2,APP,C5orf15,DHRSX,DSCAML1,EMG1,EPHA4,EPHB2,EPHB4,FAAP100,FAM114A2,FAM184A,FCHO1,FRMD8,GLOD4,GOT2,GRB10,HIST1H2BD,HLA-E,Hbb-b1,INA,KIAA1191,LRRC8D,OCEL1,PARD6A,PHACTR4,PLEKHF2,PLEKHO2,PNRC2,PTK6,Rap1,SLC25A38,TOMM40,ZIC4,ZSCAN16	16	15	Cellular Movement, Embryonic Development, Nervous System Development and Function
25	AKAP11,BCR (complex),CHI3L1,CST3,CTSC,Caspase 3/7,Cpla2,I kappa b kinase,IKK (complex),IL1,IL33,Ifn gamma,Iga,Ige,Ikb,Ikk (family),LDL,MHC Class II (complex),Mapk,Mek,NFkB (family),ODC1,P2RX4,PLD1,PLP1,PRKCQ,PRMT7,Sos,TAOK1,TH2 Cytokine,TMEM246,Tlr,Tnf (family),Tnf receptor,UNC5B	16	14	Cellular Function and Maintenance, Hematological System Development and Function, Cellular Movement
My Lists for My Projects->SCA3->Brain - 2017-02-25 11:24 AM
My Lists	Ratio	Molecules
Tox Lists for My Projects->SCA3->Brain - 2017-02-25 11:24 AM
Ingenuity Toxicity Lists	Ratio	Molecules
Cholesterol Biosynthesis	0.25	MVD,DHCR7,IDI1,HMGCS1
Renal Safety Biomarker Panel (PSTC)	0.333	CST3,CLU
Long-term Renal Injury Anti-oxidative Response Panel (Rat)	0.167	GSTM2,CBS/CBSL,Mt3
Glutathione Depletion - Phase II Reactions	0.15	GSTM2,GSTP1,GSTO1
Xenobiotic Metabolism Signaling	0.0453	PRKCQ,PPP2R2A,FGFR2,UGT8,Gstt1,GSTO1,Gstt3,FGFR3,ALDH1L1,GSTM2,PRKCD,KEAP1,CHST3,HS3ST1,GSTP1,CYP51A1
Cardiac Hypertrophy	0.0419	KLF15,CA2,APOE,CHGA,P2RX4,ADCY6,TRPC3,EEF1D,IL33,PLA2G4A,NFKBIA,ADRA2A,NPR1,PRKCD,JARID2,HEXIM1,SLC8A1,CTSC,COL9A2
LPS/IL-1 Mediated Inhibition of RXR Function	0.0472	IL33,TRAF6,APOE,ALDH1L1,GSTM2,NGFR,ACSL6,CHST3,HS3ST1,HMGCS1,GSTP1,GSTO1
Hepatic Cholestasis	0.0494	IL33,TRAF6,PRKCQ,NFKBIA,PRKCD,NGFR,ADCY6,ADCY8
Liver Proliferation	0.0435	TOP1MT,NFKBIA,CBS/CBSL,EDNRB,NGFR,FGFR2,SULF2,GLI1,ODC1,XPA
Biogenesis of Mitochondria	0.1	GNAS,P2RX7
PPARα/RXRα Activation	0.044	TRAF6,PLCB4,GNAS,NFKBIA,ADCY6,ADCY8,MAP4K4,PLCD4
LXR/RXR Activation	0.0488	IL33,APOE,ABCG4,NGFR,CLU,CYP51A1
VDR/RXR Activation	0.0513	SERPINB1,PRKCQ,PRKCD,KLK6
Renal Inorganic Phosphate Homeostasis (Mouse)	0.167	ATP1A2
NRF2-mediated Oxidative Stress Response	0.0367	FGFR3,GSTM2,PRKCQ,PRKCD,KEAP1,FGFR2,DNAJC1,GSTP1,GSTO1
Increases Liver Damage	0.0427	CCR5,DDR2,KEAP1,GSTP1,P2RX7
Hormone Receptor Regulated Cholesterol Metabolism	0.125	ABR
Negative Acute Phase Response Proteins	0.125	ITIH3
Increases Liver Steatosis	0.0435	MFSD2A,MAF1,APOE,RGCC
FXR/RXR Activation	0.0397	IL33,APOE,PCK2,G6PC3,CLU
TR/RXR Activation	0.0408	FGFR3,COL6A3,FGFR2,THRSP
Cardiac Fibrosis	0.0347	KLF15,APOE,GNAS,ADRA2A,NPR1,HEXIM1,SLC8A1
Hepatic Fibrosis	0.0396	IL33,CCR5,COL6A3,IGFBP2
Glutathione Depletion - CYP Induction and Reactive Metabolites	0.0833	TKT
Renal Necrosis/Cell Death	0.0302	FYN,APOE,UNC5B,DDX17,TCF12,PLA2G4A,SLC25A38,PMP22,NFKBIA,NFAT5,RHOG,PRKCD,SLC8A1,GSTP1,CLU,P2RX7
Cytochrome P450 Panel - Substrate is a Sterol (Human)	0.0714	CYP51A1
Cytochrome P450 Panel - Substrate is a Sterol (Mouse)	0.0714	CYP51A1
Cytochrome P450 Panel - Substrate is a Sterol (Rat)	0.0714	CYP51A1
Increases Bradycardia	0.0667	ADRA2A
RAR Activation	0.0316	PRKCQ,PRKCD,NRIP2,ADCY6,PDPK1,ADCY8
NF-κB Signaling	0.0297	IL33,FGFR3,TRAF6,PRKCQ,NFKBIA,NGFR,FGFR2,MAP4K4
Increases Glomerular Injury	0.0337	GJA1,PRKCD,PDPK1
Increases Cardiac Dilation	0.05	GNAS
Acute Renal Failure Panel (Rat)	0.0323	CLU,ASPA
PXR/RXR Activation	0.0308	GSTM2,PCK2
Renal Proximal Tubule Toxicity Biomarker Panel (Rat)	0.037	GSTP1
Reversible Glomerulonephritis Biomarker Panel (Rat)	0.037	TAP2
Increases Liver Hyperplasia/Hyperproliferation	0.0283	VCAN,ODC1,IGFBP2
Decreases Depolarization of Mitochondria and Mitochondrial Membrane	0.0345	PLA2G4A
Positive Acute Phase Response Proteins	0.0333	SERPIND1
Persistent Renal Ischemia-Reperfusion Injury (Mouse)	0.0333	CLU
Hepatic Stellate Cell Activation	0.0286	CCR5
My Pathways for My Projects->SCA3->Brain - 2017-02-25 11:24 AM
My Pathways	Ratio	Molecules
Analysis Ready Molecules for My Projects->SCA3->Brain - 2017-02-25 11:24 AM
ID	Expr Log Ratio	Expr Intensity/RPKM/FPKM/Counts	Expr p-value	Expr False Discovery Rate (q-value)
1700047M11Rik	0.694739	4.01727	7.00335e-07	8.54881e-05
2610001J05Rik	0.0914287	4.99423	0.000471875	0.0163074
2810032G03Rik	0.0427272	2.75115	0.000309759	0.0117918
2810468N07Rik	0.307931	5.08331	0.00188003	0.0437844
4831440E17Rik	0.113421	3.14956	0.000758462	0.0234592
4933431E20Rik	-0.0549874	5.95699	8.80638e-05	0.00486395
6720489N17Rik	-0.26101	2.32726	7.37984e-06	0.000625366
Abca8b	0.0467106	5.35263	1.40309e-05	0.0010782
Abca8a	0.663016	5.36068	0.000597424	0.0196057
Abcf3	-0.073647	6.43503	0.00147862	0.0369564
Abcg4	-0.0864311	6.36312	0.000587846	0.0193942
Abhd3	-0.25654	6.2579	7.048e-07	8.54881e-05
Ablim3	-0.0775013	5.97497	0.000331416	0.0124628
Abr	-0.0757827	8.77331	0.000859127	0.0254797
Acap2	0.227841	7.14727	2.0798e-07	3.10015e-05
Acot1	0.285247	3.28631	2.61496e-16	1.90308e-13
Acsl6	-0.0418999	7.64975	7.20293e-05	0.00418378
Adamts16	-0.313943	3.42839	2.07626e-05	0.00149346
Adamtsl1	0.315715	4.12142	0.00155118	0.0382782
Adcy6	-0.123991	6.3327	0.000124304	0.00612705
Adcy8	-0.224694	5.29378	0.000282661	0.0111391
Adcyap1r1	-0.181237	8.13674	0.0010304	0.0287768
Adra2a	-0.0143043	4.51394	0.00120901	0.0321674
Zfp934	-0.195779	2.14534	0.000111908	0.0056743
Akap11	0.0232757	8.42473	0.000451961	0.0158854
Aldh1l1	-0.105026	6.06938	3.31509e-05	0.00217007
Aldoc	-0.216922	10.1253	1.22224e-05	0.000969333
Anapc5	-0.0320217	7.72184	0.000221797	0.00942979
Ankrd12	0.0715032	6.74524	0.000733666	0.0228063
Ankrd13a	0.230218	6.2254	1.87037e-09	5.03049e-07
Ankrd13d	-0.163811	5.9814	1.13794e-05	0.000914196
Ankrd29	0.0678917	4.61575	0.001591	0.038901
Anln	0.768492	7.10912	0.000237135	0.0099116
Ap3b1	0.0332774	5.9353	0.000360846	0.0133265
Apoe	-0.214942	10.3672	5.71353e-05	0.00346509
Arhgef10	0.45615	6.85044	0.000118578	0.00590095
Arhgef40	-0.180929	5.66742	0.00174256	0.0417
Arpc1a	0.0607721	7.15157	8.69612e-05	0.00482459
Arpc1b	0.332097	3.89012	1.24007e-05	0.000975186
Arrdc2	0.386462	4.03046	1.12697e-10	4.49771e-08
Arrdc3	-0.00725052	6.23465	1.1733e-05	0.000936518
Arsb	0.180331	6.73593	2.20702e-19	2.4823e-16
Arsg	-0.304211	5.41246	1.30999e-07	2.251e-05
Aspa	-0.290876	4.96574	1.33676e-08	3.00698e-06
Aspg	-0.357815	2.7122	0.00211842	0.0468018
Atl2	0.00636941	6.99651	0.000101154	0.00536788
Atl3	0.176054	6.1801	0.000499187	0.0171079
Atp10b	0.649928	2.53051	0.00108155	0.0296758
Atp13a4	-0.146646	4.646	1.9051e-05	0.00141137
Atp1a2	-0.0480447	10.505	0.00025236	0.0103727
Atp1b2	-0.0667018	9.5521	0.00173884	0.0416917
Atp1b3	-0.136672	7.09278	6.9693e-08	1.24963e-05
Atp8a1	0.0978938	8.37361	0.000868915	0.0255958
Atrx	0.129345	8.10715	0.00052931	0.0179059
Atxn3	0.143728	5.4597	6.09364e-07	7.77222e-05
B230354K17Rik	-0.0580523	4.43469	1.60927e-06	0.000175699
Bbx	0.138309	5.91273	0.00150292	0.0374127
C030029H02Rik	-0.357087	2.27514	6.47443e-08	1.19058e-05
2310022B05Rik	-0.405254	6.29732	2.80928e-05	0.00187873
2810459M11Rik	-0.239681	3.50238	2.46106e-08	5.07471e-06
9530068E07Rik	0.0672734	6.43339	0.00157587	0.0386072
Sgk3	0.147124	4.67637	0.00120267	0.0320679
Car2	-0.716646	7.7939	8.8065e-48	3.6318e-44
Cabp7	-0.361549	4.32251	7.01136e-06	0.000606605
Cacna1e	0.0280554	8.16312	0.00098104	0.027711
Cacna1g	-0.12443	7.54427	8.94277e-05	0.00489247
Cacng5	0.167792	4.97483	0.000218243	0.00931069
Camk2n2	-0.143106	6.23	0.000137332	0.00654073
Capn5	-0.0714322	5.45195	0.00197811	0.0449875
Carhsp1	0.426149	6.33347	5.24501e-07	6.97755e-05
Cbs	-0.13706	5.20809	2.7128e-14	1.67814e-11
Ccp110	-0.0906165	7.00098	5.88605e-07	7.58565e-05
Ccr5	-0.126481	2.46013	0.000152173	0.00710448
Cd320	-0.151544	3.55067	1.53664e-05	0.00116634
Cd82	0.632974	5.21117	2.34643e-09	6.1766e-07
Cdc42ep2	-0.224388	3.91497	9.52866e-07	0.000109213
Cdc42ep4	-0.110772	5.84734	0.000393291	0.0142906
Cdh19	0.597005	4.10469	0.000393882	0.0142906
Cdkl1	-0.0249251	4.39456	0.00220851	0.0477686
Cdkn1c	0.149389	2.96494	2.47443e-07	3.55973e-05
Chdh	0.869748	4.08327	1.05534e-43	3.26416e-40
Chga	-0.114384	7.66389	0.000373482	0.0137521
Chil1	-0.557749	3.52479	7.60269e-19	7.23542e-16
Chst3	0.609538	2.87843	2.83063e-09	7.29596e-07
Cib2	-0.222807	4.14577	0.000832934	0.0249517
Cisd3	-0.137883	3.36889	0.0018634	0.043498
Ckap4	-0.03497	4.63113	7.29507e-05	0.00419789
Cldn11	-0.162032	7.09971	1.92939e-05	0.00142086
Clmn	-0.0640373	7.4106	0.00135714	0.0351905
Clu	-0.185607	9.34636	8.97665e-05	0.00489247
Col15a1	0.0561257	3.15209	0.0018186	0.0427751
Col2a1	0.169846	2.72198	0.00125684	0.0332257
Col6a3	0.305589	3.78565	0.000154939	0.00718521
Col9a2	0.292775	3.77931	1.59981e-08	3.47244e-06
Col9a3	0.304502	4.86415	0.000530098	0.0179059
Comtd1	-0.122275	3.23119	0.00233356	0.0497056
Coprs	-0.172671	4.49472	0.000346264	0.0128648
Myeov2	-0.186512	5.121	0.000239353	0.00997062
Cotl1	0.00262833	6.11895	3.52605e-05	0.00228399
Cptp	-0.200623	4.52785	0.000535726	0.0180109
Creb3	-0.156378	5.37707	0.00234956	0.0497752
Csad	-0.0136635	4.66987	3.60051e-06	0.000334928
Csf2ra	0.236298	5.1618	0.00108787	0.0297768
Cst3	-0.24676	9.41416	0.000862915	0.0254797
Ctbp2	-0.152508	5.37399	0.000546537	0.0182258
Cthrc1	0.100391	3.31894	0.000344844	0.0128506
Ctnnbip1	-0.0986531	4.90754	0.0001095	0.00564371
Ctps2	-0.109305	5.95911	7.03686e-05	0.0041066
Ctsc	0.208825	3.35722	0.00217225	0.0473987
Ctxn3	0.197531	3.57275	2.22807e-05	0.00154891
Cyb5r1	-0.145161	4.28149	0.000213408	0.00916766
Cyp51	-0.129521	6.21025	1.76975e-05	0.00132699
Cyth1	0.19108	6.95925	4.8941e-08	9.31535e-06
Dcdc2a	0.326151	3.98029	0.000230216	0.00968789
Ddr2	0.213626	4.02718	0.00205206	0.0461059
Ddx17	0.111905	9.56577	0.00101172	0.028319
Ddx25	-0.106909	5.45477	0.00042535	0.0152093
Ddx5	0.146786	10.121	0.000384062	0.014058
Desi1	-0.18588	6.91843	1.6383e-09	4.50424e-07
Dhcr7	-0.110791	4.98983	2.32315e-06	0.000239516
Dhrsx	0.327861	2.64374	0.000913821	0.0265394
Dip2a	-0.0329255	7.29188	0.00195509	0.0447689
Disp2	-0.205486	9.10119	0.000116907	0.00587957
Dlg1	0.0821135	7.71693	0.000728777	0.0227688
Dnajc1	0.0673426	5.22318	0.000165373	0.00756908
Doc2g	0.0530673	2.74427	0.00127838	0.0337232
Dock7	0.0435462	6.01834	0.00162566	0.03942
Dscam	-0.00959102	5.99418	0.000201835	0.0088382
Dscaml1	0.0277132	5.79877	0.00149716	0.0373444
Dusp15	0.430923	5.4242	3.43382e-09	8.67004e-07
Ednrb	-0.105208	6.48625	0.000819026	0.0247146
Eef1d	-0.10084	6.20596	0.00117014	0.0314736
Efhd1	-0.147824	5.25008	2.66263e-06	0.000263536
Ehd1	0.0312411	5.89234	7.93592e-05	0.00448325
Eid1	0.0617817	7.649	0.00172621	0.0414692
Eif3i	-0.165046	5.88395	0.000987454	0.0278286
Elf1	0.293271	3.48639	0.00193252	0.0445235
Emc7	-0.0620546	6.078	0.000800739	0.0242812
Enho	-0.344973	5.48026	3.57261e-12	1.70001e-09
Eno3	-0.196356	3.4316	0.00233422	0.0497056
Enpp6	1.24565	4.06473	3.8895e-13	2.00504e-10
Entpd2	-0.604102	3.52434	1.11364e-10	4.49771e-08
Epn2	-0.0139174	7.34195	0.00106566	0.0295614
Eps8	-0.142556	5.70558	0.00206609	0.0462236
Etnk2	-0.24516	2.2618	0.00219664	0.0475951
Etv4	0.00236887	3.83554	6.98917e-05	0.00409811
Exoc3l4	-0.400617	2.9073	0.00190652	0.0441713
Eya4	0.659322	2.41812	1.66079e-06	0.000178673
Fa2h	-0.211495	5.8392	0.000256275	0.0104516
Fads1	-0.179474	7.79268	3.91908e-09	9.69737e-07
Fads2	-0.187349	6.53934	0.00208748	0.0464501
Fam114a2	0.153241	5.53083	0.000326617	0.0123199
Fam120aos	0.255903	4.11955	3.87646e-06	0.000352929
Fam129b	-0.117444	5.37156	0.000105385	0.00552469
Fam155a	-0.0110971	6.09673	0.000296748	0.0114752
Tmem28	0.153218	3.2443	0.000162502	0.00750177
Fam161b	-0.174132	4.47825	0.001438	0.0364092
Fam163a	-0.32569	2.945	0.000205508	0.00888404
Fam208b	0.036296	5.93935	0.00203315	0.0459857
Fam20a	-0.158862	3.8376	0.000245602	0.0101286
Fam213b	-0.23996	5.6613	0.00145699	0.0365637
Fam214b	-0.104064	5.42877	1.71969e-06	0.000183414
Fam45a	-0.322359	5.53125	2.5196e-06	0.000253435
Fam49a	0.0685069	7.34903	0.000827976	0.0248634
Fam57a	-0.0797441	3.03238	4.42651e-05	0.00277994
Fbxo44	-0.166568	6.56112	0.000107098	0.00556728
Fbxw15	-0.789634	2.54774	3.3785e-30	5.97126e-27
Fcho1	0.101203	6.78769	4.65175e-07	6.32433e-05
Fgf12	-0.00302547	7.50758	0.000768218	0.0235021
Fgfr2	-0.102303	6.48719	4.15823e-08	8.27438e-06
Fgfr3	-0.196717	7.04157	3.87959e-06	0.000352929
Fggy	-0.641971	2.27936	0.00175663	0.0419556
Fnbp1	-0.142961	8.25918	5.7443e-06	0.000511284
Fnip1	0.0956642	6.40106	0.00234124	0.0497097
Foxo4	0.246278	5.13499	1.57365e-09	4.42483e-07
Foxred1	-0.108416	5.31278	0.000906502	0.026451
Frmd8	-0.154912	5.43135	6.54376e-08	1.19058e-05
Fyn	0.0630036	6.85133	3.0992e-05	0.00205045
Fzd1	0.10181	5.04746	0.00234245	0.0497097
Fzd9	-0.0980905	2.43247	0.00212749	0.0468351
G2e3	0.173034	4.58247	0.000633404	0.0204396
G6pc3	-0.0736588	5.33256	0.000113989	0.00575621
Galns	-0.248849	3.00593	0.00179297	0.0422789
Galnt10	0.278215	4.4852	2.75072e-06	0.000270095
Gdf11	-0.108283	3.7488	0.00131744	0.0345326
Ggct	-0.023561	3.72896	0.00142934	0.0363864
Gja1	-0.196649	7.87921	1.36931e-10	5.13366e-08
Gli1	-0.22548	3.13416	0.00189529	0.0439936
Glod4	-0.074175	6.12904	0.00208051	0.0463785
Glul	-0.205674	10.3939	1.71943e-14	1.11962e-11
Gm15663	0.221274	3.44983	8.04977e-05	0.0045129
Gm5141	-0.0090223	2.40104	0.000896219	0.0262749
Gm9866	-0.289289	4.31318	0.000844111	0.0251647
Gnas	-0.0478867	10.1892	0.000296846	0.0114752
Gng12	0.253234	6.04442	0.000139227	0.00659967
Gpam	-0.0687649	6.09445	5.74186e-07	7.47771e-05
Gpr153	-0.293399	5.1704	3.9966e-10	1.27117e-07
Gpr37l1	-0.104557	7.98164	0.000110115	0.00564371
Gpr4	0.0579329	2.31611	0.00178644	0.0422789
Gprc5b	-0.0257957	8.07184	1.34783e-05	0.00104737
Gpsm2	0.202749	3.58802	1.3545e-05	0.00104737
Gpt2	0.150845	6.30291	2.69549e-08	5.46698e-06
Grid2ip	0.028116	5.31232	0.000666691	0.0212039
Grin2d	-0.153124	4.89733	0.00233155	0.0497056
Grm3	-0.067835	5.54167	7.89343e-08	1.39511e-05
Grm7	-0.0147281	5.93107	0.00144421	0.0364092
Gstm7	-0.0935666	4.53323	0.000339233	0.0126797
Gsto1	-0.0792963	4.13654	9.11324e-05	0.00494513
Gstp1	-0.180324	5.90669	1.46547e-10	5.33257e-08
Gstt1	-0.235613	3.51717	8.60402e-09	2.08724e-06
Gstt3	-0.175134	2.61042	0.00108157	0.0296758
Haus8	-0.211004	3.38997	5.98106e-05	0.00359212
Hexim1	0.0119262	6.09106	0.00196488	0.0447689
Hhip	0.539997	4.63431	8.29677e-05	0.00462376
Hip1r	0.18009	6.81242	4.78939e-07	6.44069e-05
Hipk3	0.0869954	7.13026	0.000611037	0.0198719
Hist1h1c	0.480397	3.44858	0.00135961	0.0351905
Hist3h2ba	0.212142	3.66315	1.08675e-06	0.00012223
Hist1h2be	0.661731	2.86908	3.09469e-17	2.39297e-14
Hmgcs1	-0.0812716	7.88406	0.000395802	0.0143183
Homer2	0.0409076	5.62561	9.50917e-05	0.00509296
Hs3st1	0.039857	4.55092	0.00150837	0.037473
Hsd11b1	0.0926409	4.27818	0.000204852	0.00888404
Hunk	0.149956	4.49187	0.00132636	0.0346735
Idi1	-0.0107159	3.38618	0.00214497	0.0470271
Igdcc4	-0.053536	6.21749	1.00599e-08	2.34831e-06
Igfbp2	0.324675	4.67131	0.000732	0.0228063
Il33	-0.87025	6.32381	4.84122e-38	9.9826e-35
Ino80d	0.159081	6.04269	0.00137272	0.0353818
Ipo4	-0.155705	6.64781	0.00129301	0.0339641
Iqcb1	-0.214049	5.05148	0.00178632	0.0422789
Iqsec3	-0.00664466	7.95802	0.00154572	0.0382782
Itih3	-0.943091	6.36304	0.000193103	0.00853241
Jam3	0.248905	5.71871	0.000130517	0.0063573
Jarid2	0.114262	6.10245	0.00135898	0.0351905
Kcna6	-0.033463	7.17049	6.84484e-06	0.000596369
Kcnip1	-0.130504	5.36633	0.000132706	0.00643859
Kcnj16	-0.141903	5.2427	0.000450492	0.0158854
Kcnk13	-0.444192	3.68449	2.9448e-19	3.03609e-16
Kctd3	-0.100544	6.53516	1.39539e-07	2.3649e-05
Kctd5	-0.164849	4.77903	0.000902016	0.0263824
Kdm4a	0.0990057	6.30168	0.000137455	0.00654073
Kdm6a	0.0426718	5.54927	0.00215726	0.0471549
Keap1	0.0680298	6.15015	0.000918347	0.0265501
2810403A07Rik	0.130489	6.38422	0.00085079	0.0253028
E330009J07Rik	0.28731	4.87624	7.51433e-05	0.00430404
AI464131	-0.160432	5.25393	1.2336e-06	0.000137496
4833439L19Rik	-0.0829534	7.119	0.000224031	0.00947003
Kif13b	-0.0821966	6.1598	7.82643e-06	0.000654247
Kif19a	0.82138	2.9501	4.72043e-05	0.00294956
Kifc3	-0.0391625	5.90624	0.00201154	0.0455802
Klc4	-0.0879942	5.21589	0.000523334	0.0178299
Klf15	0.0908497	4.75345	0.00147297	0.0368897
Klhdc7a	-0.221405	4.48787	0.000687664	0.0216483
Klhl2	0.163901	7.5643	0.00179134	0.0422789
Klk6	-0.70859	4.32057	2.12624e-05	0.00152057
L3mbtl1	-0.239894	4.3932	0.000268359	0.0107797
Lama2	0.348738	4.66423	2.04158e-05	0.00148579
Lamtor3	0.255005	4.5828	0.00138104	0.0355222
Lars2	0.405447	11.0832	0.000686581	0.0216483
Lats2	0.284826	5.68211	0.000147718	0.00692258
Lgi4	-0.386642	5.99992	1.26808e-10	4.90273e-08
1500009C09Rik	-0.166791	6.5319	2.55851e-06	0.000255273
LOC100862268	0.271157	2.64543	0.00012824	0.00629597
Lrch3	0.237262	6.17021	0.000462692	0.0160348
Lrig1	-0.314954	6.66618	0.000438979	0.0156514
Lrp8	-0.0323913	6.72249	0.000202167	0.0088382
Lrrc42	-0.0250211	4.40278	0.000918479	0.0265501
Lrrc8d	0.0644736	5.6995	6.76178e-05	0.00400271
Macrod1	0.200316	3.65555	0.000216072	0.00924999
Mad2l2	-0.203772	3.19348	0.000940337	0.0269927
Maf1	0.0290393	6.01652	0.000577531	0.0191048
Mal	-0.302559	7.99191	2.4469e-07	3.55973e-05
Map4k4	0.227392	7.86896	0.00176671	0.0420634
Mast1	-0.165139	6.86451	8.06136e-05	0.0045129
Matn4	0.159196	3.49183	0.000169375	0.00767586
Mcam	-0.332891	5.32811	2.7466e-07	3.90585e-05
Metrn	-0.168731	6.3245	0.000771246	0.0235021
Mfsd2a	0.260206	4.3316	3.38212e-10	1.16232e-07
Mid1ip1	-0.190141	6.88889	1.37363e-08	3.03474e-06
Mif4gd	0.255884	4.58312	1.58488e-06	0.000175073
Mitf	0.240836	4.11041	0.00095896	0.0273426
Mkrn1	0.131171	7.17739	1.16238e-09	3.34442e-07
Mllt10	0.0916156	5.6424	3.82363e-05	0.00245108
Mmd2	-0.225327	6.86016	0.000378608	0.0138995
Mmp15	-0.0452425	4.68329	0.000185447	0.00822348
Mobp	-0.274877	9.01922	5.55755e-06	0.000498247
Mpp7	0.166116	4.49921	0.00139137	0.0356397
Mrgpre	-0.267942	3.6123	0.00155345	0.0382782
3010026O09Rik	-0.168886	3.02696	0.00214486	0.0470271
Msmo1	-0.133706	6.03773	0.00011924	0.00590095
Mt3	-0.108681	7.34367	0.000270136	0.0108159
Mtdh	0.150651	6.61898	0.00191119	0.044192
Mthfd2	-0.183685	4.03265	0.000110393	0.00564371
Mtss1l	-0.192789	8.0743	1.70733e-05	0.00128799
Mvd	-0.256686	4.03527	0.00214762	0.0470271
Myo9a	0.0150033	7.31311	1.74806e-07	2.7376e-05
Naprt	-0.260225	2.79153	0.000257657	0.0104516
Nbas	-0.0596787	6.21875	1.65507e-07	2.65929e-05
Nbea	0.0390618	8.32959	0.000493223	0.0169504
Nde1	0.398602	5.16391	0.000302618	0.0115555
Ndrg2	-0.334428	9.76611	3.65564e-10	1.22237e-07
Neat1	-0.202601	8.84314	0.00221807	0.0478082
Nedd4l	0.101058	7.30871	0.00179408	0.0422789
Nek4	-0.165354	5.00168	0.00194703	0.0446913
Nelfb	-0.0574842	5.98612	0.00028271	0.0111391
Nfat5	0.0967646	7.55014	0.00223965	0.0481896
Nfe2l3	0.714778	3.4425	1.67143e-08	3.56533e-06
Nfkbia	0.255305	3.58409	1.89155e-07	2.88917e-05
Nfyc	0.0896936	4.86357	0.00194237	0.0446672
Ngfr	-0.858649	2.86282	3.39453e-05	0.00221038
Nmral1	-0.255121	4.3233	9.66636e-07	0.000109718
Notch1	0.174343	5.46877	1.57847e-07	2.56959e-05
Npr1	-0.290969	3.24337	0.000386457	0.014104
Nrip2	-0.153208	5.10608	0.00154962	0.0382782
Nrip3	0.0149929	7.06614	0.00144495	0.0364092
Nudt14	-0.233718	2.15099	0.000185201	0.00822348
Nudt17	-0.350232	2.31554	2.38085e-05	0.00162739
Nudt22	-0.131267	3.09985	0.000937	0.0269594
Nwd1	-0.103009	6.74293	0.000404173	0.0145361
Ocel1	0.291762	2.56145	4.21343e-08	8.27438e-06
Odc1	-0.215941	5.58452	7.7195e-05	0.004381
Ogt	0.158308	9.02237	2.8795e-07	4.04832e-05
Olig1	0.430723	7.11377	6.6107e-07	8.25525e-05
Olig2	0.349378	5.39661	0.000767499	0.0235021
Oplah	-0.151612	5.06612	0.00134656	0.0350729
Osbpl7	-0.0725079	5.16071	0.00219515	0.0475951
Otud7b	0.422181	7.21169	0.000959155	0.0273426
P2rx4	0.272386	4.58307	0.00124497	0.0330531
P2rx7	0.429294	4.31129	2.01728e-06	0.00020973
Pafah1b3	-0.370893	3.62363	0.000447052	0.0158479
Paics	-0.0738733	6.77781	0.000924611	0.026665
Paqr6	-0.424944	4.0334	0.000165795	0.00756908
Paqr7	-0.170153	6.30302	1.86067e-05	0.00138676
Parp16	-0.0833649	2.29332	7.68998e-05	0.004381
Pcdhb13	0.169167	3.2535	0.000752964	0.0233476
Pck2	-0.174159	4.72759	0.000643398	0.0206221
Pcmtd1	0.0965744	7.37738	0.000722993	0.0226453
Pcolce2	0.385694	3.27905	2.86234e-05	0.00190392
Pde4dip	0.0554662	8.18512	0.00205337	0.0461059
Pde8a	-0.286573	4.76131	8.93169e-11	3.81044e-08
Pdlim2	-0.52517	3.8393	2.07131e-07	3.10015e-05
Pdpk1	0.0833569	7.53965	0.0006344	0.0204396
Pex5l	-0.101816	7.78859	0.000198625	0.00874514
Phactr4	0.297478	4.54824	2.5061e-06	0.000253435
Phip	0.108455	6.77407	0.00026473	0.0106685
Phkg1	-0.159795	4.23433	2.02649e-05	0.00148353
Phlpp1	-0.0171478	7.20866	0.00029058	0.0114129
Pias3	-0.0885672	4.75808	0.00160229	0.0389672
Piga	-0.0302406	3.83291	4.04204e-05	0.00255144
Pim3	0.191878	5.43862	0.00112528	0.0305306
Pisd	-0.121578	5.45271	0.00207139	0.0462586
Pitpnm1	-0.233927	7.84236	0.00119135	0.0319034
Pla2g4a	0.59092	3.00062	0.00212475	0.0468351
Pla2g7	-0.182308	7.25688	0.000118918	0.00590095
Plcb4	0.182181	7.20391	0.00219054	0.0475951
Plcd4	-0.156031	5.11161	0.00108157	0.0296758
Pld1	0.444995	4.12987	0.00117021	0.0314736
Plekha7	0.0486322	5.2063	0.000969971	0.027524
Plekho2	-0.256313	4.55787	5.21434e-10	1.57346e-07
Plin4	0.861012	3.67146	0.000462547	0.0160348
Plp1	-0.354202	11.1699	5.87362e-11	2.5953e-08
Pls1	-0.0196105	4.88062	9.5336e-07	0.000109213
Plxna3	-0.273916	5.95944	0.000545117	0.0182258
Plxnb3	0.684597	6.58342	1.29843e-08	2.97485e-06
Pm20d1	0.249899	2.25274	0.000663608	0.0211602
Pmp22	-0.0947741	5.28077	2.41361e-06	0.000246787
Pnp	-0.196229	3.73315	6.05464e-05	0.00361874
Poc1a	0.0883724	2.43106	0.000297732	0.0114752
Podxl2	-0.129704	6.6173	0.00232503	0.0497056
Pofut2	-0.066991	4.80603	0.00221637	0.0478082
Polr2a	0.352289	7.34806	1.45488e-23	1.99997e-20
Ppl	0.616094	2.86767	1.21304e-22	1.50077e-19
Ppm1e	0.104311	7.51945	0.000639246	0.0205422
Ppm1m	-0.262794	4.59038	0.00056449	0.0187235
Ppp1r14c	-0.105532	3.62378	4.88966e-05	0.00302475
Ppp1r2	0.185836	7.10615	0.00163339	0.0394692
Ppp1r26	-0.139115	4.96097	0.000301791	0.0115555
Ppp1r3c	-0.218669	5.53937	4.44421e-10	1.37459e-07
Ppp1r9a	0.142508	8.53822	0.000823192	0.0247799
Ppp2r2a	0.0922956	6.72282	0.00104008	0.0289818
Prex2	-0.00478971	6.60321	3.34027e-06	0.000315464
Prim1	-0.197114	3.36134	0.000256955	0.0104516
Prkcd	0.401333	6.07282	4.15489e-07	5.77577e-05
Prkcq	0.536263	4.34612	4.49613e-08	8.69158e-06
Prmt7	-0.152644	5.21016	0.00210404	0.0466982
Prob1	0.586514	3.59549	3.75874e-41	9.30064e-38
Prr18	-0.173862	6.2714	0.000129173	0.00631669
Psat1	0.458923	7.34854	1.23251e-13	6.62981e-11
Psmb10	-0.059439	4.20739	0.000957978	0.0273426
Ptbp3	0.0922677	5.27139	0.000348506	0.0129093
Ptpn3	0.0645288	5.58376	0.00125061	0.0331317
Pygb	-0.124792	8.03854	0.00115146	0.0311046
Pygm	-0.111112	6.05679	0.000450914	0.0158854
Qdpr	-0.363323	7.71458	3.55674e-14	2.09543e-11
Qk	-0.0180723	8.92628	4.79775e-05	0.0029828
Rab30	0.157707	4.06263	0.00160175	0.0389672
Rasa4	-0.318831	4.5854	0.000321861	0.0121776
Rasd1	0.116406	2.91256	1.03537e-05	0.000837229
Rec8	-0.879693	3.11451	5.9403e-05	0.00358504
Rgcc	0.145998	3.16606	8.91768e-07	0.000106086
Rhbdf1	-0.206723	4.07434	0.000294056	0.0114752
Rhog	-0.188045	4.89712	7.16934e-07	8.61156e-05
Rian	0.207136	9.45487	1.83871e-06	0.000194432
Rita1	-0.0471232	4.09906	0.00155625	0.0382782
Rnf122	0.342776	3.40637	0.000481496	0.0165935
Rnf144a	0.197824	5.45196	0.0011179	0.030397
Rnf43	0.881036	2.68782	3.64602e-24	5.63857e-21
Rnf7	-0.10442	6.0147	2.26408e-05	0.0015636
Rnpep	0.0970232	5.53176	1.8357e-07	2.83892e-05
Robo2	0.101783	6.62236	0.000910297	0.0264993
Rpl39	-0.197617	4.38774	0.000163418	0.00751603
Rps10	-0.256897	3.11802	0.00013499	0.00647324
Rps14	-0.253965	6.785	6.66675e-06	0.000584971
Rps24	-0.158405	6.39292	0.00097733	0.0276694
Rps6ka1	-0.139317	5.56036	0.000596689	0.0196057
Rps6ka3	0.134016	6.6014	0.000234046	0.00981567
Rufy1	-0.0321006	5.7263	8.90896e-05	0.00489247
S1pr1	-0.20586	7.10467	9.13715e-09	2.17394e-06
S1pr3	-0.188614	3.02739	0.000531155	0.0179059
Samd12	0.159862	2.69752	0.000174645	0.00782866
Sardh	-0.0912521	3.81928	0.000105919	0.00552923
Scd2	-0.0808042	10.9939	2.98077e-06	0.00028811
Scly	-0.187582	4.10558	3.12584e-06	0.000297484
Scrn2	-0.262541	2.64091	9.22148e-05	0.00498201
Sdc3	-0.114271	8.01116	0.00108178	0.0296758
Sema3d	0.563058	3.58716	6.8809e-05	0.00405383
Sema4d	0.226634	6.37975	0.000399262	0.0144014
Sema4g	-0.315547	6.10874	0.00052458	0.0178299
Sema6d	-0.135802	7.315	9.50761e-07	0.000109213
Serpinb1a	-0.813612	3.97537	1.31701e-18	1.16386e-15
Serpind1	-0.0535941	2.88701	2.70037e-05	0.0018157
Sertad2	0.213086	4.97468	0.000104522	0.00550275
Sesn2	-0.0334173	3.60909	0.000670934	0.0212764
Sesn3	0.174801	5.85081	0.00196061	0.0447689
Sez6l	-0.0655843	7.69419	0.000278766	0.0110897
Sft2d2	0.239361	5.61177	0.00120061	0.0320679
Sft2d3	0.204114	3.23917	9.30886e-05	0.00500736
Sfxn5	-0.164236	7.56741	3.78169e-06	0.000349157
Sh3pxd2b	-0.150719	4.77473	1.93327e-06	0.000202698
Shd	-0.159212	4.72536	7.11436e-06	0.000611242
Shisa6	-0.226285	6.14483	1.61896e-06	0.000175699
Slain1	-0.129986	6.02133	0.000172312	0.00778045
Slc13a5	-0.134298	3.53347	0.000621951	0.0201434
Slc1a2	-0.163007	11.1299	4.00709e-10	1.27117e-07
Slc1a6	-0.35333	5.66696	0.00107922	0.0296758
Slc22a23	0.115314	6.77901	0.00210618	0.0466982
Slc24a3	-0.215169	6.78655	0.000101526	0.00536788
Slc25a10	-0.202118	4.23168	0.00100711	0.0282538
Slc25a18	-0.298155	5.73073	1.44849e-07	2.42172e-05
Slc25a38	0.106137	4.34449	1.4798e-05	0.00113013
Slc25a51	0.0447458	6.83736	0.00184128	0.0430629
Slc26a11	-0.345989	3.27596	0.000264363	0.0106685
Slc46a1	-0.203724	4.02467	0.00176794	0.0420634
Slc4a4	-0.084052	8.6091	0.000321296	0.0121776
Slc6a9	-0.0832448	6.86013	0.00144841	0.0364222
Slc7a10	-0.145543	5.43507	0.000446885	0.0158479
Slc7a11	-0.164293	5.63704	4.20742e-07	5.7838e-05
Slc8a1	0.190895	7.7901	0.000774168	0.0235332
Slc9a3r1	-0.26501	5.53034	2.18582e-05	0.00153653
Slu7	-0.0378442	6.39076	0.000768878	0.0235021
Smoc1	0.502798	4.61507	1.04267e-09	3.07142e-07
Smyd2	-0.145205	5.77712	0.000672412	0.0212764
Snhg3	0.307377	2.62051	0.000334352	0.0125352
Snrnp25	-0.278134	3.54782	0.000541666	0.0181612
Snx22	0.15135	3.93088	0.000206088	0.00888404
Snx8	-0.226945	4.31649	2.17111e-05	0.00153491
Son	0.195718	9.00288	0.00014418	0.0067825
Sox8	0.376605	5.97632	1.16786e-13	6.56763e-11
Sparcl1	-0.1428	11.2513	1.0256e-05	0.000834781
Spry1	0.0885033	3.1319	0.00206224	0.0462211
Srpk3	0.28131	3.78191	2.15384e-07	3.1723e-05
Srsf4	0.145613	4.0819	0.000109559	0.00564371
Srsf6	0.0967558	7.53517	2.05592e-05	0.00148747
Ss18	0.207838	5.26334	7.25071e-06	0.000618661
Ssh3	-0.151493	5.97519	0.000841237	0.0251396
Sspo	0.45701	3.22392	0.000155064	0.00718521
St3gal4	-0.275679	4.79211	3.95384e-05	0.00252149
St5	0.259739	5.22022	5.08075e-05	0.0030965
Stard13	0.45555	4.62663	5.07474e-05	0.0030965
Stmn3	-0.151888	8.73341	0.00029327	0.0114752
Strip1	-0.0770452	6.35676	0.00162816	0.03942
Sulf2	0.387358	6.4734	0.000769281	0.0235021
Sumf1	0.0267808	4.74757	0.000253488	0.0103846
Susd5	0.371205	3.09367	1.00869e-05	0.000826459
Syde2	0.485089	2.36418	2.35377e-10	8.32025e-08
Synpr	-0.209517	6.73143	0.000769476	0.0235021
Taok1	0.158511	7.70881	0.00046258	0.0160348
Tap2	0.0252751	4.08914	0.00129281	0.0339641
Tbc1d23	0.0393608	5.65217	0.00235523	0.04981
Tbkbp1	-0.0668352	6.25984	0.00024261	0.0100724
Tcea2	-0.132236	5.0679	0.00217767	0.0474334
Tcf12	0.253235	6.36957	4.97701e-05	0.00306346
Tex2	-0.0341458	7.1288	0.000606628	0.0198026
Thrsp	0.0401411	4.19417	0.000134002	0.00647324
Thsd1	0.415751	2.66797	7.59589e-06	0.000639295
Thsd7a	0.231873	6.53157	0.000174299	0.00782866
Tkt	-0.123613	7.13389	3.98766e-05	0.00253002
Tlcd1	-0.26499	3.89547	2.66348e-11	1.22047e-08
Tle4	0.116508	6.13548	0.00060284	0.0197311
Tmc3	1.1627	3.04217	1.05478e-65	1.30498e-61
Tmc6	0.286007	3.2748	1.68676e-07	2.67546e-05
[truncated: 70 more rows]

## Sheet: brainstem
Ingenuity pathway analysis brainstem (238 genes)
Ingenuity Canonical Pathways	p-value	zScore	Ratio	Molecules
Role of PI3K/AKT Signaling in the Pathogenesis of Influenza	0.000120226	-1.63299	0.0789	FGFR3,FGFR2,CCR5,ATM,IRF3,NFKBIA
Superpathway of Cholesterol Biosynthesis	0.00017378	NaN	0.143	HMGCS1,IDI1,CYP51A1,MSMO1
FAK Signaling	0.000512861	NaN	0.0606	FGFR3,FGFR2,EGFR,FYN,TNS1,ATM
Th2 Pathway	0.000851138	0	0.0467	FGFR3,FGFR2,CCR5,NOTCH1,ATM,IL33,S1PR1
Amyotrophic Lateral Sclerosis Signaling	0.000933254	NaN	0.0541	FGFR3,FGFR2,GLUL,CACNA1E,ATM,SLC1A2
Zymosterol Biosynthesis	0.00147911	NaN	0.333	CYP51A1,MSMO1
NF-κB Activation by Viruses	0.0018197	-1	0.0581	FGFR3,FGFR2,CCR5,ATM,NFKBIA
G-Protein Coupled Receptor Signaling	0.00186209	NaN	0.0331	FGFR3,FGFR2,PDE8A,P2RY12,FYN,ATM,NFKBIA,GRM3,S1PR1
Germ Cell-Sertoli Cell Junction Signaling	0.00194984	NaN	0.0405	FGFR3,FGFR2,EPN2,MAP3K2,PLS1,ATM,KEAP1
CD28 Signaling in T Helper Cells	0.00218776	-0.447214	0.0458	FGFR3,FGFR2,FYN,ATM,NFKBIA,ARPC1B
PKCθ Signaling in T Lymphocytes	0.00229087	-0.816497	0.0455	FGFR3,FGFR2,FYN,MAP3K2,ATM,NFKBIA
Th1 and Th2 Activation Pathway	0.00281838	NaN	0.0378	FGFR3,FGFR2,CCR5,NOTCH1,ATM,IL33,S1PR1
Ephrin A Signaling	0.00316228	NaN	0.0667	FGFR3,FGFR2,FYN,ATM
Insulin Receptor Signaling	0.00316228	-1.63299	0.0426	FGFR3,FGFR2,FYN,PPP1R3C,ATM,FOXO4
RANK Signaling in Osteoclasts	0.00363078	-2	0.0495	FGFR3,FGFR2,MAP3K2,ATM,NFKBIA
UVB-Induced MAPK Signaling	0.00446684	NaN	0.0606	FGFR3,FGFR2,EGFR,ATM
Lymphotoxin β Receptor Signaling	0.0047863	-2	0.0597	FGFR3,FGFR2,ATM,NFKBIA
Role of IL-17A in Arthritis	0.0047863	NaN	0.0597	FGFR3,FGFR2,ATM,NFKBIA
T Cell Receptor Signaling	0.00501187	NaN	0.0459	FGFR3,FGFR2,FYN,ATM,NFKBIA
EGF Signaling	0.00501187	-2	0.0588	FGFR3,FGFR2,EGFR,ATM
ErbB2-ErbB3 Signaling	0.00524807	-1	0.058	FGFR3,FGFR2,ETV4,ATM
Pancreatic Adenocarcinoma Signaling	0.00707946	-1.34164	0.0424	FGFR3,FGFR2,EGFR,NOTCH1,ATM
PTEN Signaling	0.00724436	1.34164	0.042	FGFR3,FGFR2,PREX2,EGFR,FOXO4
Cholesterol Biosynthesis I	0.0074131	NaN	0.154	CYP51A1,MSMO1
Cholesterol Biosynthesis II (via 24,25-dihydrolanosterol)	0.0074131	NaN	0.154	CYP51A1,MSMO1
Cholesterol Biosynthesis III (via Desmosterol)	0.0074131	NaN	0.154	CYP51A1,MSMO1
Mevalonate Pathway I	0.0074131	NaN	0.154	HMGCS1,IDI1
Oleate Biosynthesis II (Animals)	0.0074131	NaN	0.154	Scd2,FADS1
fMLP Signaling in Neutrophils	0.00776247	-1.34164	0.0413	FGFR3,FGFR2,ATM,NFKBIA,ARPC1B
Angiopoietin Signaling	0.00776247	NaN	0.0519	FGFR3,FGFR2,ATM,NFKBIA
Estrogen-Dependent Breast Cancer Signaling	0.00776247	-2	0.0519	FGFR3,FGFR2,EGFR,ATM
IL-17A Signaling in Airway Cells	0.00776247	-2	0.0519	FGFR3,FGFR2,ATM,NFKBIA
Non-Small Cell Lung Cancer Signaling	0.00776247	-2	0.0519	FGFR3,FGFR2,EGFR,ATM
CD40 Signaling	0.00812831	-2	0.0513	FGFR3,FGFR2,ATM,NFKBIA
Role of Tissue Factor in Cancer	0.00812831	NaN	0.041	FGFR3,FGFR2,EGFR,FYN,ATM
Sphingosine-1-phosphate Signaling	0.00831764	-2	0.0407	FGFR3,FGFR2,ATM,NAAA,S1PR1
Erythropoietin Signaling	0.00851138	NaN	0.0506	FGFR3,FGFR2,ATM,NFKBIA
Role of p14/p19ARF in Tumor Suppression	0.00933254	NaN	0.0698	FGFR3,FGFR2,ATM
IL-6 Signaling	0.00954993	-1.34164	0.0394	FGFR3,FGFR2,ATM,NFKBIA,IL33
Type II Diabetes Mellitus Signaling	0.00954993	-1	0.0394	FGFR3,FGFR2,ATM,NFKBIA,ACSL6
Prolactin Signaling	0.01	-1	0.0482	FGFR3,FGFR2,FYN,ATM
NF-κB Signaling	0.0102329	-2.44949	0.0333	FGFR3,FGFR2,EGFR,ATM,NFKBIA,IL33
Glutamine Biosynthesis I	0.0102329	NaN	1	GLUL,
PEDF Signaling	0.0104713	NaN	0.0476	FGFR3,FGFR2,ATM,NFKBIA
Small Cell Lung Cancer Signaling	0.0104713	NaN	0.0476	FGFR3,FGFR2,ATM,NFKBIA
IL-9 Signaling	0.0107152	NaN	0.0667	FGFR3,FGFR2,ATM
Hepatic Fibrosis / Hepatic Stellate Cell Activation	0.0109648	NaN	0.0328	FGFR2,CCR5,EGFR,EDNRB,COL2A1,COL9A2
LPS-stimulated MAPK Signaling	0.0114815	-1	0.0465	FGFR3,FGFR2,ATM,NFKBIA
HER-2 Signaling in Breast Cancer	0.0123027	NaN	0.0455	FGFR3,FGFR2,EGFR,ATM
Th1 Pathway	0.0123027	-1.34164	0.037	FGFR3,FGFR2,CCR5,NOTCH1,ATM
Superpathway of Geranylgeranyldiphosphate Biosynthesis I (via Mevalonate)	0.0125893	NaN	0.118	HMGCS1,IDI1
γ-linolenate Biosynthesis II (Animals)	0.0125893	NaN	0.118	FADS1,ACSL6
Dendritic Cell Maturation	0.0128825	-0.816497	0.0316	FGFR3,FGFR2,ATM,COL2A1,NFKBIA,IL33
Production of Nitric Oxide and Reactive Oxygen Species in Macrophages	0.0138038	-0.816497	0.0311	FGFR3,FGFR2,PPP1R3C,MAP3K2,ATM,NFKBIA
Reelin Signaling in Neurons	0.0141254	NaN	0.0435	FGFR3,FGFR2,FYN,ATM
Ceramide Signaling	0.0147911	1	0.043	FGFR3,FGFR2,ATM,S1PR1
Prostate Cancer Signaling	0.0154882	NaN	0.0426	FGFR3,FGFR2,ATM,NFKBIA
3-phosphoinositide Biosynthesis	0.0158489	NaN	0.0302	FGFR3,FGFR2,EGFR,FYN,DUSP15,ATM
Ovarian Cancer Signaling	0.0158489	NaN	0.0347	FGFR3,FGFR2,EGFR,ATM,GJA1
Docosahexaenoic Acid (DHA) Signaling	0.0158489	NaN	0.0577	FGFR3,FGFR2,ATM
Epithelial Adherens Junction Signaling	0.0165959	NaN	0.0342	EGFR,EPN2,NOTCH1,KEAP1,ARPC1B
FcγRIIB Signaling in B Lymphocytes	0.0165959	NaN	0.0566	FGFR3,FGFR2,ATM
Unfolded protein response	0.017378	NaN	0.0556	OS9,SCAP,CD82
ErbB Signaling	0.0177828	NaN	0.0408	FGFR3,FGFR2,EGFR,ATM
Melanoma Signaling	0.018197	NaN	0.0545	FGFR3,FGFR2,ATM
CTLA4 Signaling in Cytotoxic T Lymphocytes	0.018197	NaN	0.0404	FGFR3,FGFR2,FYN,ATM
Relaxin Signaling	0.0194984	-2	0.0329	FGFR3,FGFR2,PDE8A,ATM,NFKBIA
Choline Degradation I	0.0199526	NaN	0.5	CHDH,
Cysteine Biosynthesis/Homocysteine Degradation	0.0199526	NaN	0.5	CBS/CBSL,
Taurine Biosynthesis	0.0199526	NaN	0.5	CSAD,
UVA-Induced MAPK Signaling	0.0199526	-2	0.0392	FGFR3,FGFR2,EGFR,ATM
Virus Entry via Endocytic Pathways	0.0199526	NaN	0.0392	FGFR3,FGFR2,FYN,ATM
Glutamate Receptor Signaling	0.0199526	NaN	0.0526	GLUL,SLC1A2,GRM3
SAPK/JNK Signaling	0.0213796	-2	0.0385	FGFR3,FGFR2,MAP3K2,ATM
MSP-RON Signaling Pathway	0.0218776	NaN	0.0508	FGFR3,FGFR2,ATM
Regulation of eIF4 and p70S6K Signaling	0.0218776	NaN	0.0318	FGFR3,FGFR2,EIF3E,ATM,RPS14
Integrin Signaling	0.0245471	-0.447214	0.0274	FGFR3,FGFR2,TSPAN2,FYN,ATM,ARPC1B
Glioma Signaling	0.025704	-2	0.0364	FGFR3,FGFR2,EGFR,ATM
Telomerase Signaling	0.0263027	-2	0.036	FGFR3,FGFR2,EGFR,ATM
CNTF Signaling	0.0263027	NaN	0.0476	FGFR3,FGFR2,ATM
Endometrial Cancer Signaling	0.0269153	NaN	0.0469	FGFR3,FGFR2,ATM
IL-2 Signaling	0.0269153	NaN	0.0469	FGFR3,FGFR2,ATM
Xenobiotic Metabolism Signaling	0.0275423	NaN	0.0244	FGFR3,FGFR2,CHST3,MAP3K2,ATM,UGT8,KEAP1
Thrombopoietin Signaling	0.0281838	NaN	0.0462	FGFR3,FGFR2,ATM
Nitric Oxide Signaling in the Cardiovascular System	0.0281838	-2	0.0354	FGFR3,FGFR2,CACNA1E,ATM
Neuropathic Pain Signaling In Dorsal Horn Neurons	0.0288403	-2	0.0351	FGFR3,FGFR2,ATM,GRM3
Gap Junction Signaling	0.0295121	NaN	0.0294	FGFR3,FGFR2,EGFR,MAP3K2,ATM
HGF Signaling	0.0295121	-2	0.0348	FGFR3,FGFR2,MAP3K2,ATM
Thiosulfate Disproportionation III (Rhodanese)	0.0301995	NaN	0.333	TST,
NGF Signaling	0.030903	-2	0.0342	FGFR3,FGFR2,MAP3K2,ATM
Rac Signaling	0.030903	-1	0.0342	FGFR3,FGFR2,ATM,ARPC1B
IL-10 Signaling	0.0316228	NaN	0.0441	CCR5,NFKBIA,IL33
Superpathway of Inositol Phosphate Compounds	0.0323594	NaN	0.0256	FGFR3,FGFR2,EGFR,FYN,DUSP15,ATM
Fc Epsilon RI Signaling	0.0331131	-1	0.0336	FGFR3,FGFR2,FYN,ATM
Glioma Invasiveness Signaling	0.0338844	NaN	0.0429	FGFR3,FGFR2,ATM
Myc Mediated Apoptosis Signaling	0.0338844	NaN	0.0429	FGFR3,FGFR2,ATM
Natural Killer Cell Signaling	0.0354813	NaN	0.0328	FGFR3,FGFR2,FYN,ATM
iCOS-iCOSL Signaling in T Helper Cells	0.0354813	NaN	0.0328	FGFR3,FGFR2,ATM,NFKBIA
Caveolar-mediated Endocytosis Signaling	0.0354813	NaN	0.0423	EGFR,FYN,MAP3K2
Role of JAK1 and JAK3 in γc Cytokine Signaling	0.0354813	NaN	0.0423	FGFR3,FGFR2,ATM
ErbB4 Signaling	0.0363078	NaN	0.0417	FGFR3,FGFR2,ATM
GM-CSF Signaling	0.0380189	NaN	0.0411	FGFR3,FGFR2,ATM
STAT3 Pathway	0.0380189	NaN	0.0411	FGFR3,FGFR2,EGFR
B Cell Receptor Signaling	0.0398107	-1.34164	0.027	FGFR3,FGFR2,MAP3K2,ATM,NFKBIA
Role of NFAT in Regulation of the Immune Response	0.0398107	-1	0.027	FGFR3,FGFR2,FYN,ATM,NFKBIA
Phenylalanine Degradation I (Aerobic)	0.0398107	NaN	0.25	QDPR,
Phenylethylamine Degradation I	0.0398107	NaN	0.25	ALDH2,
CREB Signaling in Neurons	0.0398107	-2	0.0272	FGFR3,FGFR2,POLR2A,ATM,GRM3
Antiproliferative Role of Somatostatin Receptor 2	0.040738	NaN	0.04	FGFR3,FGFR2,ATM
GDNF Family Ligand-Receptor Interactions	0.0416869	NaN	0.0395	FGFR3,FGFR2,ATM
IL-15 Signaling	0.0416869	NaN	0.0395	FGFR3,FGFR2,ATM
Neurotrophin/TRK Signaling	0.0416869	NaN	0.0395	FGFR3,FGFR2,ATM
Regulation of the Epithelial-Mesenchymal Transition Pathway	0.0436516	NaN	0.0265	FGFR3,FGFR2,EGFR,NOTCH1,ATM
Gα12/13 Signaling	0.0436516	NaN	0.0308	FGFR3,FGFR2,ATM,NFKBIA
p70S6K Signaling	0.0446684	-2	0.0305	FGFR3,FGFR2,EGFR,ATM
P2Y Purigenic Receptor Signaling Pathway	0.0457088	-1	0.0303	FGFR3,FGFR2,P2RY12,ATM
Growth Hormone Signaling	0.0489779	NaN	0.037	FGFR3,FGFR2,ATM
Macropinocytosis Signaling	0.0489779	NaN	0.037	FGFR3,FGFR2,ATM
Renal Cell Carcinoma Signaling	0.0489779	NaN	0.037	FGFR3,FGFR2,ATM
Clathrin-mediated Endocytosis Signaling	0.0501187	NaN	0.0254	FGFR3,FGFR2,ATM,HIP1R,ARPC1B
Serine Biosynthesis	0.0501187	NaN	0.2	PSAT1,
Trans, trans-farnesyl Diphosphate Biosynthesis	0.0501187	NaN	0.2	IDI1,
Cardiac β-adrenergic Signaling	0.0512861	NaN	0.0292	PDE8A,CACNA1E,PPP1R3C,AKAP11
Role of Pattern Recognition Receptors in Recognition of Bacteria and Viruses	0.0512861	-1	0.0292	FGFR3,FGFR2,ATM,IRF3
ERK/MAPK Signaling	0.0524807	-0.447214	0.0251	FGFR3,FGFR2,FYN,PPP1R3C,ATM
mTOR Signaling	0.0524807	NaN	0.0251	FGFR3,FGFR2,EIF3E,ATM,RPS14
IL-3 Signaling	0.0524807	NaN	0.0361	FGFR3,FGFR2,ATM
JAK/Stat Signaling	0.0524807	NaN	0.0361	FGFR3,FGFR2,ATM
FLT3 Signaling in Hematopoietic Progenitor Cells	0.0549541	NaN	0.0353	FGFR3,FGFR2,ATM
IL-17 Signaling	0.0549541	NaN	0.0353	FGFR3,FGFR2,ATM
Leptin Signaling in Obesity	0.0549541	NaN	0.0353	FGFR3,FGFR2,ATM
Hereditary Breast Cancer Signaling	0.0562341	NaN	0.0282	FGFR3,FGFR2,POLR2A,ATM
Human Embryonic Stem Cell Pluripotency	0.057544	NaN	0.028	FGFR3,FGFR2,ATM,S1PR1
VEGF Family Ligand-Receptor Interactions	0.060256	NaN	0.0341	FGFR3,FGFR2,ATM
IL-4 Signaling	0.0616595	NaN	0.0337	FGFR3,FGFR2,ATM
FGF Signaling	0.0630957	NaN	0.0333	FGFR3,FGFR2,ATM
PDGF Signaling	0.0630957	NaN	0.0333	FGFR3,FGFR2,ATM
Acute Myeloid Leukemia Signaling	0.0645654	NaN	0.033	FGFR3,FGFR2,ATM
Ceramide Degradation	0.0691831	NaN	0.143	NAAA,
Superpathway of Serine and Glycine Biosynthesis I	0.0691831	NaN	0.143	PSAT1,
Role of Hypercytokinemia/hyperchemokinemia in the Pathogenesis of Influenza	0.0707946	NaN	0.0465	CCR5,IL33
Role of RIG1-like Receptors in Antiviral Innate Immunity	0.0707946	NaN	0.0465	IRF3,NFKBIA
Melanocyte Development and Pigmentation Signaling	0.0724436	NaN	0.0316	FGFR3,FGFR2,ATM
EIF2 Signaling	0.074131	NaN	0.0226	FGFR3,FGFR2,EIF3E,ATM,RPS14
cAMP-mediated signaling	0.0758578	-2	0.0224	PDE8A,P2RY12,AKAP11,GRM3,S1PR1
Glioblastoma Multiforme Signaling	0.0776247	-2	0.0252	FGFR3,FGFR2,EGFR,ATM
TR/RXR Activation	0.0776247	NaN	0.0306	FGFR3,FGFR2,ATM
Gαq Signaling	0.0794328	NaN	0.025	FGFR3,FGFR2,ATM,NFKBIA
PAK Signaling	0.0831764	NaN	0.0297	FGFR3,FGFR2,ATM
Pathogenesis of Multiple Sclerosis	0.0870964	NaN	0.111	CCR5,
Sphingosine and Sphingosine-1-phosphate Metabolism	0.0870964	NaN	0.111	NAAA,
Sucrose Degradation V (Mammalian)	0.0870964	NaN	0.111	ALDOC,
Role of Osteoblasts, Osteoclasts and Chondrocytes in Rheumatoid Arthritis	0.0870964	NaN	0.0216	FGFR3,FGFR2,ATM,NFKBIA,IL33
VEGF Signaling	0.0870964	NaN	0.0291	FGFR3,FGFR2,ATM
Chronic Myeloid Leukemia Signaling	0.0891251	NaN	0.0288	FGFR3,FGFR2,ATM
Cardiac Hypertrophy Signaling	0.0912011	-2.23607	0.0213	FGFR3,FGFR2,CACNA1E,MAP3K2,ATM
IGF-1 Signaling	0.0933254	NaN	0.0283	FGFR3,FGFR2,ATM
Mouse Embryonic Stem Cell Pluripotency	0.0933254	NaN	0.0283	FGFR3,FGFR2,ATM
Tec Kinase Signaling	0.0954993	-1	0.0235	FGFR3,FGFR2,FYN,ATM
Huntington's Disease Signaling	0.0977237	-2	0.0207	FGFR3,FGFR2,EGFR,POLR2A,ATM
CD27 Signaling in Lymphocytes	0.0977237	NaN	0.0385	MAP3K2,NFKBIA
Ketogenesis	0.0977237	NaN	0.1	HMGCS1,
p53 Signaling	0.102802	NaN	0.027	FGFR3,FGFR2,ATM
Protein Kinase A Signaling	0.104232	-1.34164	0.0179	ANAPC5,PDE8A,PPP1R3C,DUSP15,PHKG1,NFKBIA,AKAP11
Signaling by Rho Family GTPases	0.10666	-1.34164	0.0202	FGFR3,FGFR2,ATM,CDC42EP2,ARPC1B
Sertoli Cell-Sertoli Cell Junction Signaling	0.107152	NaN	0.0225	EPN2,MAP3K2,PLS1,KEAP1
Paxillin Signaling	0.107152	NaN	0.0265	FGFR3,FGFR2,ATM
HIF1α Signaling	0.111429	NaN	0.0261	FGFR3,FGFR2,ATM
Gαi Signaling	0.12218	NaN	0.025	P2RY12,GRM3,S1PR1
Renin-Angiotensin Signaling	0.12218	NaN	0.025	FGFR3,FGFR2,ATM
Endothelin-1 Signaling	0.12218	-2	0.0214	FGFR3,FGFR2,ATM,EDNRB
Fatty Acid Activation	0.12388	NaN	0.0769	ACSL6,
LXR/RXR Activation	0.124451	NaN	0.0248	IRF3,CYP51A1,IL33
AMPK Signaling	0.125603	-1	0.0212	FGFR3,FGFR2,ATM,FOXO4
Phagosome Formation	0.126765	NaN	0.0246	FGFR3,FGFR2,ATM
Role of NANOG in Mammalian Embryonic Stem Cell Pluripotency	0.126765	NaN	0.0246	FGFR3,FGFR2,ATM
Activation of IRF by Cytosolic Pattern Recognition Receptors	0.130317	NaN	0.0323	IRF3,NFKBIA
DNA Double-Strand Break Repair by Homologous Recombination	0.132739	NaN	0.0714	ATM,
DNA Double-Strand Break Repair by Non-Homologous End Joining	0.132739	NaN	0.0714	ATM,
Phenylalanine Degradation IV (Mammalian, via Side Chain)	0.132739	NaN	0.0714	ALDH2,
NRF2-mediated Oxidative Stress Response	0.132739	NaN	0.0207	FGFR3,FGFR2,ATM,KEAP1
ERK5 Signaling	0.13366	NaN	0.0317	EGFR,MAP3K2
IL-8 Signaling	0.139959	-2	0.0203	FGFR3,FGFR2,EGFR,ATM
Hypoxia Signaling in the Cardiovascular System	0.140605	NaN	0.0308	ATM,NFKBIA
Chondroitin Sulfate Degradation (Metazoa)	0.141579	NaN	0.0667	ARSB,
14-3-3-mediated Signaling	0.145211	NaN	0.0231	FGFR3,FGFR2,ATM
CCR3 Signaling in Eosinophils	0.145211	NaN	0.0231	FGFR3,FGFR2,ATM
Breast Cancer Regulation by Stathmin1	0.151008	NaN	0.0197	FGFR3,FGFR2,PPP1R3C,ATM
Thrombin Signaling	0.151008	-2	0.0197	FGFR3,FGFR2,EGFR,ATM
HMGB1 Signaling	0.152405	NaN	0.0226	FGFR3,FGFR2,ATM
Adipogenesis pathway	0.154525	NaN	0.0224	FGFR3,FGFR2,CLOCK
Agrin Interactions at Neuromuscular Junction	0.154525	NaN	0.029	EGFR,LAMA2
Mitochondrial L-carnitine Shuttle Pathway	0.158855	NaN	0.0588	ACSL6,
Glucocorticoid Receptor Signaling	0.166725	NaN	0.0174	FGFR3,FGFR2,POLR2A,ATM,NFKBIA
Toll-like Receptor Signaling	0.172187	NaN	0.027	NFKBIA,IL33
Cysteine Biosynthesis III (mammalia)	0.175792	NaN	0.0526	CBS/CBSL,
DNA damage-induced 14-3-3σ Signaling	0.175792	NaN	0.0526	ATM,
GADD45 Signaling	0.175792	NaN	0.0526	ATM,
Histamine Degradation	0.175792	NaN	0.0526	ALDH2,
Molecular Mechanisms of Cancer	0.179473	NaN	0.016	FGFR3,FGFR2,FYN,NOTCH1,ATM,NFKBIA
Dopamine Receptor Signaling	0.183231	NaN	0.026	PPP1R3C,QDPR
IL-12 Signaling and Production in Macrophages	0.184502	NaN	0.0205	FGFR3,FGFR2,ATM
VDR/RXR Activation	0.186638	NaN	0.0256	SERPINB1,KLK6
LPS/IL-1 Mediated Inhibition of RXR Function	0.188365	NaN	0.018	HMGCS1,CHST3,IL33,ACSL6
Regulation of IL-2 Expression in Activated and Anergic T Lymphocytes	0.190546	NaN	0.0253	FYN,NFKBIA
Maturity Onset Diabetes of Young (MODY) Signaling	0.192309	NaN	0.0476	CACNA1E,
Oxidative Ethanol Degradation III	0.192309	NaN	0.0476	ALDH2,
ATM Signaling	0.194089	NaN	0.025	ATM,NFKBIA
Systemic Lupus Erythematosus Signaling	0.194536	NaN	0.0178	FGFR3,FGFR2,ATM,IL33
Actin Cytoskeleton Signaling	0.200447	-1	0.0175	FGFR3,FGFR2,ATM,ARPC1B
Fatty Acid α-oxidation	0.200447	NaN	0.0455	ALDH2,
Role of Macrophages, Fibroblasts and Endothelial Cells in Rheumatoid Arthritis	0.204644	NaN	0.0162	FGFR3,FGFR2,ATM,NFKBIA,IL33
eNOS Signaling	0.207491	NaN	0.0194	FGFR3,FGFR2,ATM
Putrescine Degradation III	0.208449	NaN	0.0435	ALDH2,
CDP-diacylglycerol Biosynthesis I	0.21677	NaN	0.0417	GPAM,
Bladder Cancer Signaling	0.219786	NaN	0.023	FGFR3,EGFR
Bupropion Degradation	0.224388	NaN	0.04	CYP51A1,
Ethanol Degradation IV	0.224388	NaN	0.04	ALDH2,
IL-17A Signaling in Gastric Cells	0.224388	NaN	0.04	EGFR,
Tryptophan Degradation X (Mammalian, via Tryptamine)	0.224388	NaN	0.04	ALDH2,
Gluconeogenesis I	0.232274	NaN	0.0385	ALDOC,
Glycolysis I	0.232274	NaN	0.0385	ALDOC,
Phosphatidylglycerol Biosynthesis II (Non-plastidic)	0.232274	NaN	0.0385	GPAM,
CXCR4 Signaling	0.233884	NaN	0.0182	FGFR3,FGFR2,ATM
Regulation of Actin-based Motility by Rho	0.234963	NaN	0.022	ARHGDIA,ARPC1B
Aldosterone Signaling in Epithelial Cells	0.236592	NaN	0.0181	FGFR3,FGFR2,ATM
Acetone Degradation I (to Methylglyoxal)	0.240436	NaN	0.037	CYP51A1,
IL-15 Production	0.240436	NaN	0.037	IRF3,
Colorectal Cancer Metastasis Signaling	0.240991	-2	0.0162	FGFR3,FGFR2,EGFR,ATM
Fcγ Receptor-mediated Phagocytosis in Macrophages and Monocytes	0.242661	NaN	0.0215	FYN,ARPC1B
PPAR Signaling	0.242661	NaN	0.0215	NFKBIA,IL33
Acute Phase Response Signaling	0.244906	NaN	0.0178	NFKBIA,IL33,SERPIND1
Sumoylation Pathway	0.253513	NaN	0.0208	ARHGDIA,NFKBIA
Intrinsic Prothrombin Activation Pathway	0.255859	NaN	0.0345	COL2A1,
TNFR2 Signaling	0.255859	NaN	0.0345	NFKBIA,
PPARα/RXRα Activation	0.269153	NaN	0.0169	CLOCK,NFKBIA,HELZ2
4-1BB Signaling in T Lymphocytes	0.270396	NaN	0.0323	NFKBIA,
Cholecystokinin/Gastrin-mediated Signaling	0.27227	NaN	0.0198	EGFR,IL33
Fatty Acid β-oxidation I	0.277971	NaN	0.0312	ACSL6,
Superpathway of Methionine Degradation	0.277971	NaN	0.0312	CBS/CBSL,
Circadian Rhythm Signaling	0.285102	NaN	0.0303	CLOCK,
MIF-mediated Glucocorticoid Regulation	0.285102	NaN	0.0303	NFKBIA,
Inhibition of Angiogenesis by TSP1	0.292415	NaN	0.0294	FYN,
Oncostatin M Signaling	0.292415	NaN	0.0294	CHI3L1,
TWEAK Signaling	0.292415	NaN	0.0294	NFKBIA,
Coagulation System	0.299916	NaN	0.0286	SERPIND1,
Dopamine Degradation	0.299916	NaN	0.0286	ALDH2,
IL-17A Signaling in Fibroblasts	0.299916	NaN	0.0286	NFKBIA,
Nucleotide Excision Repair Pathway	0.299916	NaN	0.0286	POLR2A,
Axonal Guidance Signaling	0.303389	NaN	0.0134	FGFR3,FGFR2,PLXNB3,FYN,ATM,ARPC1B
Role of NFAT in Cardiac Hypertrophy	0.30761	NaN	0.0156	FGFR3,FGFR2,ATM
Ethanol Degradation II	0.314051	NaN	0.027	ALDH2,
ILK Signaling	0.31842	NaN	0.0153	FGFR3,FGFR2,ATM
April Mediated Signaling	0.320627	NaN	0.0263	NFKBIA,
Cell Cycle Control of Chromosomal Replication	0.320627	NaN	0.0263	PRIM1,
Notch Signaling	0.320627	NaN	0.0263	NOTCH1,
Estrogen Biosynthesis	0.327341	NaN	0.0256	CYP51A1,
tRNA Splicing	0.327341	NaN	0.0256	PDE8A,
B Cell Activating Factor Signaling	0.334195	NaN	0.025	NFKBIA,
Noradrenaline and Adrenaline Degradation	0.334195	NaN	0.025	ALDH2,
Role of PKR in Interferon Induction and Antiviral Response	0.334195	NaN	0.025	NFKBIA,
MIF Regulation of Innate Immunity	0.341193	NaN	0.0244	NFKBIA,
Stearate Biosynthesis I (Animals)	0.341193	NaN	0.0244	ACSL6,
Synaptic Long Term Potentiation	0.342768	NaN	0.0167	PPP1R3C,GRM3
UVC-Induced MAPK Signaling	0.347536	NaN	0.0238	EGFR,
RhoA Signaling	0.350752	NaN	0.0164	CDC42EP2,ARPC1B
Pyrimidine Ribonucleotides Interconversion	0.354813	NaN	0.0233	ENTPD2,
Serotonin Receptor Signaling	0.354813	NaN	0.0233	QDPR,
Leukocyte Extravasation Signaling	0.357273	NaN	0.0143	FGFR3,FGFR2,ATM
Gustation Pathway	0.358096	NaN	0.0161	PDE8A,P2RY12
iNOS Signaling	0.36141	NaN	0.0227	NFKBIA,
Pyrimidine Ribonucleotides De Novo Biosynthesis	0.367282	NaN	0.0222	ENTPD2,
Atherosclerosis Signaling	0.368978	NaN	0.0157	COL2A1,IL33
PI3K Signaling in B Lymphocytes	0.372392	NaN	0.0156	FYN,NFKBIA
Triacylglycerol Biosynthesis	0.374111	NaN	0.0217	GPAM,
GNRH Signaling	0.375837	NaN	0.0155	EGFR,MAP3K2
Dermatan Sulfate Biosynthesis (Late Stages)	0.380189	NaN	0.0213	CHST3,
Graft-versus-Host Disease Signaling	0.386367	NaN	0.0208	IL33,
Cancer Drug Resistance By Drug Efflux	0.392645	NaN	0.0204	FOXO4,
Cell Cycle: G2/M DNA Damage Checkpoint Regulation	0.392645	NaN	0.0204	ATM,
TNFR1 Signaling	0.392645	NaN	0.0204	NFKBIA,
Assembly of RNA Polymerase II Complex	0.399025	NaN	0.02	POLR2A,
Chondroitin Sulfate Biosynthesis (Late Stages)	0.399025	NaN	0.02	CHST3,
Semaphorin Signaling in Neurons	0.416869	NaN	0.0189	FYN,
Nicotine Degradation III	0.422669	NaN	0.0185	CYP51A1,
Role of Cytokines in Mediating Communication between Immune Cells	0.422669	NaN	0.0185	IL33,
Role of CHK Proteins in Cell Cycle Checkpoint Control	0.428549	NaN	0.0182	ATM,
Actin Nucleation by ARP-WASP Complex	0.43451	NaN	0.0179	ARPC1B,
Regulation of Cellular Mechanics by Calpain Protease	0.440555	NaN	0.0175	EGFR,
Chondroitin Sulfate Biosynthesis	0.445656	NaN	0.0172	CHST3,
Nur77 Signaling in T Lymphocytes	0.451856	NaN	0.0169	MAP3K2,
Dermatan Sulfate Biosynthesis	0.457088	NaN	0.0167	CHST3,
Induction of Apoptosis by HIV1	0.457088	NaN	0.0167	NFKBIA,
Melatonin Degradation I	0.467735	NaN	0.0161	CYP51A1,
Nicotine Degradation II	0.473151	NaN	0.0159	CYP51A1,
Cell Cycle: G1/S Checkpoint Regulation	0.47863	NaN	0.0156	ATM,
Protein Ubiquitination Pathway	0.47863	NaN	0.0118	ANAPC5,USP31,USP53
Hepatic Cholestasis	0.479733	NaN	0.0126	NFKBIA,IL33
Dopamine-DARPP32 Feedback in cAMP Signaling	0.489779	NaN	0.0123	CACNA1E,PPP1R3C
Mitotic Roles of Polo-Like Kinase	0.489779	NaN	0.0152	ANAPC5,
GABA Receptor Signaling	0.494311	NaN	0.0149	GABRB1,
Superpathway of Melatonin Degradation	0.494311	NaN	0.0149	CYP51A1,
CCR5 Signaling in Macrophages	0.504661	NaN	0.0145	CCR5,
Remodeling of Epithelial Adherens Junctions	0.504661	NaN	0.0145	ARPC1B,
Cdc42 Signaling	0.505825	NaN	0.012	CDC42EP2,ARPC1B
Wnt/β-catenin Signaling	0.511682	NaN	0.0118	SOX8,GJA1
Chemokine Signaling	0.515229	NaN	0.0141	CCR5,
RhoGDI Signaling	0.524807	NaN	0.0116	ARHGDIA,ARPC1B
Ephrin Receptor Signaling	0.52723	NaN	0.0115	FYN,ARPC1B
Serotonin Degradation	0.529663	NaN	0.0135	ALDH2,
Heparan Sulfate Biosynthesis (Late Stages)	0.539511	NaN	0.0132	CHST3,
Cyclins and Cell Cycle Regulation	0.548277	NaN	0.0128	ATM,
Role of BRCA1 in DNA Damage Response	0.548277	NaN	0.0128	ATM,
Heparan Sulfate Biosynthesis	0.570164	NaN	0.012	CHST3,
HIPPO signaling	0.587489	NaN	0.0115	PPP1R3C,
α-Adrenergic Signaling	0.587489	NaN	0.0115	PHKG1,
G Beta Gamma Signaling	0.591562	NaN	0.0114	EGFR,
Neuregulin Signaling	0.591562	NaN	0.0114	EGFR,
Apoptosis Signaling	0.595662	NaN	0.0112	NFKBIA,
Communication between Innate and Adaptive Immune Cells	0.595662	NaN	0.0112	IL33,
OX40 Signaling Pathway	0.595662	NaN	0.0112	NFKBIA,
Altered T Cell and B Cell Signaling in Rheumatoid Arthritis	0.599791	NaN	0.0111	IL33,
IL-1 Signaling	0.603949	NaN	0.011	NFKBIA,
Death Receptor Signaling	0.608135	NaN	0.0109	NFKBIA,
Salvage Pathways of Pyrimidine Ribonucleotides	0.620869	NaN	0.0105	UCKL1,
3-phosphoinositide Degradation	1	NaN	0.00637	DUSP15,
Agranulocyte Adhesion and Diapedesis	1	NaN	0.00529	IL33,
Androgen Signaling	1	NaN	0.00901	POLR2A,
Antioxidant Action of Vitamin C	1	NaN	0.00971	NFKBIA,
Aryl Hydrocarbon Receptor Signaling	1	NaN	0.00714	ATM,
CDK5 Signaling	1	NaN	0.0101	PPP1R3C,
Cellular Effects of Sildenafil (Viagra)	1	NaN	0.00769	CACNA1E,
D-myo-inositol (1,4,5,6)-Tetrakisphosphate Biosynthesis	1	NaN	0.00699	DUSP15,
D-myo-inositol (3,4,5,6)-tetrakisphosphate Biosynthesis	1	NaN	0.00699	DUSP15,
D-myo-inositol-5-phosphate Metabolism	1	NaN	0.00621	DUSP15,
Estrogen Receptor Signaling	1	NaN	0.00781	POLR2A,
FXR/RXR Activation	1	NaN	0.00794	IL33,
Granulocyte Adhesion and Diapedesis	1	NaN	0.00565	IL33,
PI3K/AKT Signaling	1	NaN	0.00806	NFKBIA,
Phagosome Maturation	1	NaN	0.00694	EEA1,
Phospholipase C Signaling	1	NaN	0.00417	FYN,
Synaptic Long Term Depression	1	NaN	0.00685	GRM3,
Type I Diabetes Mellitus Signaling	1	NaN	0.00909	NFKBIA,
p38 MAPK Signaling	1	NaN	0.00855	IL33,

## Sheet: blood 75 weeks
Ingenuity pathway analysis blood (142 genes)
Ingenuity Canonical Pathways	-log(p-value)	p-value	zScore	Ratio	Molecules
Oxidative Phosphorylation	5.29	5.12861e-06	NaN	0.0642	ATP5S,UQCRC2,COX5A,NDUFA12,ATP5J,NDUFA5,ATP5D
Mitochondrial Dysfunction	4.95	1.12202e-05	NaN	0.0468	ATP5S,UQCRC2,COX5A,NDUFA12,OGDH,ATP5J,NDUFA5,ATP5D
TCA Cycle II (Eukaryotic)	3.43	0.000371535	NaN	0.13	FH,OGDH,MDH1
RAR Activation	2.19	0.00645654	NaN	0.0263	NCOR2,SMAD7,PNRC1,CCNH,CITED2
Estrogen Receptor Signaling	2.09	0.00812831	NaN	0.0312	NCOR2,MED13L,CCNH,RUNX2
Thrombin Signaling	2.07	0.00851138	0	0.0246	RHOH,F2R,ARHGEF6,RHOB,GNAL
Glioma Invasiveness Signaling	2.03	0.00933254	NaN	0.0429	RHOH,F2R,RHOB
CDP-diacylglycerol Biosynthesis I	2.02	0.00954993	NaN	0.0833	AGPAT2,LPCAT3
Phosphatidylglycerol Biosynthesis II (Non-plastidic)	1.95	0.0112202	NaN	0.0769	AGPAT2,LPCAT3
HIPPO signaling	1.78	0.0165959	NaN	0.0345	SCRIB,Ppp1cc,PPM1J
Inosine-5'-phosphate Biosynthesis II	1.74	0.018197	NaN	0.333	ADSL,
RhoGDI Signaling	1.65	0.0223872	NaN	0.0231	RHOH,ARHGEF6,RHOB,GNAL
CDK5 Signaling	1.63	0.0234423	NaN	0.0303	Ppp1cc,PPM1J,GNAL
Molecular Mechanisms of Cancer	1.54	0.0288403	NaN	0.016	RHOH,SMAD7,ARHGEF6,RHOB,GNAL,FZD5
2-ketoglutarate Dehydrogenase Complex	1.52	0.0301995	NaN	0.2	OGDH,
Tetrapyrrole Biosynthesis II	1.52	0.0301995	NaN	0.2	ALAD,
Triacylglycerol Biosynthesis	1.49	0.0323594	NaN	0.0435	AGPAT2,LPCAT3
ILK Signaling	1.48	0.0331131	-1	0.0204	RHOH,ARHGEF6,PPM1J,RHOB
mTOR Signaling	1.46	0.0346737	NaN	0.0201	RHOH,PPM1J,RHOB,RPS7
Chondroitin and Dermatan Biosynthesis	1.44	0.0363078	NaN	0.167	CHSY1,
Selenocysteine Biosynthesis II (Archaea and Eukaryotes)	1.44	0.0363078	NaN	0.167	SEPHS2,
Chondroitin Sulfate Biosynthesis (Late Stages)	1.42	0.0380189	NaN	0.04	HS3ST3B1,CHSY1
Natural Killer Cell Signaling	1.4	0.0398107	NaN	0.0246	KLRD1,Klra7 (includes others),HCST
Semaphorin Signaling in Neurons	1.37	0.042658	NaN	0.0377	RHOH,RHOB
Aspartate Degradation II	1.37	0.042658	NaN	0.143	MDH1,
Actin Nucleation by ARP-WASP Complex	1.33	0.0467735	NaN	0.0357	RHOH,RHOB
Adipogenesis pathway	1.3	0.0501187	NaN	0.0224	AGPAT2,CCNH,FZD5
Chondroitin Sulfate Biosynthesis	1.3	0.0501187	NaN	0.0345	HS3ST3B1,CHSY1
Dermatan Sulfate Biosynthesis	1.28	0.0524807	NaN	0.0333	HS3ST3B1,CHSY1
Actin Cytoskeleton Signaling	1.28	0.0524807	NaN	0.0175	F2R,ARHGEF6,FGF13,MATK
Heme Biosynthesis II	1.27	0.0537032	NaN	0.111	ALAD,
Purine Nucleotides De Novo Biosynthesis II	1.18	0.0660693	NaN	0.0909	ADSL,
Signaling by Rho Family GTPases	1.17	0.0676083	NaN	0.0162	RHOH,ARHGEF6,RHOB,GNAL
Cleavage and Polyadenylation of Pre-mRNA	1.15	0.0707946	NaN	0.0833	CPSF2,
Protein Ubiquitination Pathway	1.14	0.0724436	NaN	0.0157	DNAJC19,DNAJC15,PSMD1,PSMB10
Glioblastoma Multiforme Signaling	1.12	0.0758578	NaN	0.0189	RHOH,RHOB,FZD5
Assembly of RNA Polymerase III Complex	1.11	0.0776247	NaN	0.0769	GTF3C1,
Guanosine Nucleotides Degradation III	1.11	0.0776247	NaN	0.0769	NT5E,
BMP signaling pathway	1.1	0.0794328	NaN	0.0263	SMAD7,RUNX2
CXCR4 Signaling	1.09	0.0812831	NaN	0.0182	RHOH,RHOB,GNAL
Dopamine Receptor Signaling	1.09	0.0812831	NaN	0.026	Ppp1cc,PPM1J
Cyclins and Cell Cycle Regulation	1.08	0.0831764	NaN	0.0256	PPM1J,CCNH
Role of BRCA1 in DNA Damage Response	1.08	0.0831764	NaN	0.0256	FAAP100,BRCA2
VDR/RXR Activation	1.08	0.0831764	NaN	0.0256	NCOR2,RUNX2
Aldosterone Signaling in Epithelial Cells	1.08	0.0831764	NaN	0.0181	DNAJC19,SGK1,DNAJC15
DNA Double-Strand Break Repair by Homologous Recombination	1.08	0.0831764	NaN	0.0714	BRCA2,
Urate Biosynthesis/Inosine 5'-phosphate Degradation	1.08	0.0831764	NaN	0.0714	NT5E,
Tec Kinase Signaling	1.06	0.0870964	NaN	0.0176	RHOH,RHOB,GNAL
Granzyme B Signaling	1.03	0.0933254	NaN	0.0625	LMNB1,
Adenosine Nucleotides Degradation II	1	0.1	NaN	0.0588	NT5E,
TGF-β Signaling	0.997	0.100693	NaN	0.023	SMAD7,RUNX2
Xenobiotic Metabolism Signaling	0.992	0.101859	NaN	0.0139	NCOR2,HS3ST3B1,PPM1J,CITED2
G Beta Gamma Signaling	0.989	0.102565	NaN	0.0227	ARHGEF6,GNAL
Crosstalk between Dendritic Cells and Natural Killer Cells	0.981	0.104472	NaN	0.0225	KLRD1,IL2RB
D-myo-inositol (1,4,5)-trisphosphate Degradation	0.977	0.105439	NaN	0.0556	PMPCA,
Th1 and Th2 Activation Pathway	0.972	0.10666	NaN	0.0162	KLRD1,IL2RB,IL18R1
Regulation of Actin-based Motility by Rho	0.965	0.108393	NaN	0.022	RHOH,RHOB
1D-myo-inositol Hexakisphosphate Biosynthesis II (Mammalian)	0.955	0.110917	NaN	0.0526	PMPCA,
D-myo-inositol (1,3,4)-trisphosphate Biosynthesis	0.955	0.110917	NaN	0.0526	PMPCA,
PPAR Signaling	0.949	0.11246	NaN	0.0215	NCOR2,CITED2
DNA Methylation and Transcriptional Repression Signaling	0.934	0.116413	NaN	0.05	MBD2,
Purine Nucleotides Degradation II (Aerobic)	0.934	0.116413	NaN	0.05	NT5E,
Production of Nitric Oxide and Reactive Oxygen Species in Macrophages	0.932	0.11695	NaN	0.0155	RHOH,PPM1J,RHOB
Sumoylation Pathway	0.926	0.118577	NaN	0.0208	RHOH,RHOB
Cholecystokinin/Gastrin-mediated Signaling	0.89	0.128825	NaN	0.0198	RHOH,RHOB
Pyrimidine Deoxyribonucleotides De Novo Biosynthesis I	0.877	0.132739	NaN	0.0435	DUT,
Superpathway of D-myo-inositol (1,4,5)-trisphosphate Metabolism	0.86	0.138038	NaN	0.0417	PMPCA,
Antiproliferative Role of TOB in T Cell Signaling	0.828	0.148594	NaN	0.0385	TOB1,
Gluconeogenesis I	0.828	0.148594	NaN	0.0385	MDH1,
NAD Salvage Pathway II	0.828	0.148594	NaN	0.0385	NT5E,
Androgen Signaling	0.825	0.149624	NaN	0.018	CCNH,GNAL
Telomerase Signaling	0.825	0.149624	NaN	0.018	PPM1J,IL2RB
Role of Osteoblasts, Osteoclasts and Chondrocytes in Rheumatoid Arthritis	0.763	0.172584	NaN	0.0129	RUNX2,FZD5,IL18R1
Phagosome Formation	0.76	0.17378	NaN	0.0164	RHOH,RHOB
Sphingosine-1-phosphate Signaling	0.755	0.175792	NaN	0.0163	RHOH,RHOB
Superpathway of Inositol Phosphate Compounds	0.755	0.175792	NaN	0.0128	Ppp1cc,FIG4,PMPCA
Cardiac Hypertrophy Signaling	0.751	0.177419	NaN	0.0128	RHOH,RHOB,GNAL
Phospholipase C Signaling	0.733	0.184927	NaN	0.0125	RHOH,ARHGEF6,RHOB
Huntington's Disease Signaling	0.729	0.186638	NaN	0.0124	NCOR2,SGK1,ATP5J
p70S6K Signaling	0.713	0.193642	NaN	0.0153	F2R,PPM1J
Cell Cycle Regulation by BTG Family Proteins	0.71	0.194984	NaN	0.0286	PPM1J,
Coagulation System	0.71	0.194984	NaN	0.0286	F2R,
Nucleotide Excision Repair Pathway	0.71	0.194984	NaN	0.0286	CCNH,
Colorectal Cancer Metastasis Signaling	0.708	0.195884	NaN	0.0121	RHOH,RHOB,FZD5
HMGB1 Signaling	0.703	0.198153	NaN	0.015	RHOH,RHOB
Th1 Pathway	0.694	0.202302	NaN	0.0148	KLRD1,IL18R1
Cardiac β-adrenergic Signaling	0.684	0.207014	NaN	0.0146	Ppp1cc,PPM1J
Inhibition of Matrix Metalloproteases	0.669	0.214289	NaN	0.0256	RECK,
tRNA Charging	0.669	0.214289	NaN	0.0256	LARS2,
Insulin Receptor Signaling	0.666	0.215774	NaN	0.0142	Ppp1cc,SGK1
Hereditary Breast Cancer Signaling	0.661	0.218273	NaN	0.0141	FAAP100,BRCA2
Transcriptional Regulatory Network in Embryonic Stem Cells	0.659	0.21928	NaN	0.025	EOMES,
D-myo-inositol (1,4,5,6)-Tetrakisphosphate Biosynthesis	0.657	0.220293	NaN	0.014	Ppp1cc,FIG4
D-myo-inositol (3,4,5,6)-tetrakisphosphate Biosynthesis	0.657	0.220293	NaN	0.014	Ppp1cc,FIG4
Human Embryonic Stem Cell Pluripotency	0.657	0.220293	NaN	0.014	SMAD7,FZD5
Ovarian Cancer Signaling	0.652	0.222844	NaN	0.0139	BRCA2,FZD5
Phagosome Maturation	0.652	0.222844	NaN	0.0139	DYNLRB1,CTSW
Mechanisms of Viral Exit from Host Cells	0.649	0.224388	NaN	0.0244	LMNB1,
Synaptic Long Term Depression	0.643	0.22751	NaN	0.0137	PPM1J,GNAL
Pyrimidine Ribonucleotides Interconversion	0.631	0.233884	NaN	0.0233	RECQL,
Pyrimidine Ribonucleotides De Novo Biosynthesis	0.614	0.24322	NaN	0.0222	RECQL,
Dermatan Sulfate Biosynthesis (Late Stages)	0.598	0.252348	NaN	0.0213	HS3ST3B1,
3-phosphoinositide Degradation	0.598	0.252348	NaN	0.0127	Ppp1cc,FIG4
Regulation of eIF4 and p70S6K Signaling	0.598	0.252348	NaN	0.0127	PPM1J,RPS7
Gαq Signaling	0.586	0.259418	NaN	0.0125	RHOH,RHOB
Glucocorticoid Receptor Signaling	0.584	0.260615	NaN	0.0105	NCOR2,CCNH,SGK1
D-myo-inositol-5-phosphate Metabolism	0.583	0.261216	NaN	0.0124	Ppp1cc,FIG4
Dopamine-DARPP32 Feedback in cAMP Signaling	0.579	0.263633	NaN	0.0123	Ppp1cc,PPM1J
Assembly of RNA Polymerase II Complex	0.575	0.266073	NaN	0.02	CCNH,
Tight Junction Signaling	0.56	0.275423	NaN	0.012	PPM1J,CPSF2
Wnt/β-catenin Signaling	0.553	0.279898	NaN	0.0118	PPM1J,FZD5
Role of CHK Proteins in Cell Cycle Checkpoint Control	0.54	0.288403	NaN	0.0182	PPM1J,
Germ Cell-Sertoli Cell Junction Signaling	0.539	0.289068	NaN	0.0116	RHOH,RHOB
Wnt/Ca+ pathway	0.527	0.297167	NaN	0.0175	FZD5,
Axonal Guidance Signaling	0.522	0.300608	NaN	0.00891	SEMA4F,ARHGEF6,GNAL,FZD5
autophagy	0.508	0.310456	NaN	0.0167	CTSW,
ERK5 Signaling	0.491	0.322849	NaN	0.0159	SGK1,
PCP pathway	0.491	0.322849	NaN	0.0159	FZD5,
AMPK Signaling	0.488	0.325087	NaN	0.0106	PPM1J,AK2
Regulation of the Epithelial-Mesenchymal Transition Pathway	0.488	0.325087	NaN	0.0106	FGF13,FZD5
IL-2 Signaling	0.485	0.327341	NaN	0.0156	IL2RB,
Pyridoxal 5'-phosphate Salvage Pathway	0.48	0.331131	NaN	0.0154	SGK1,
NRF2-mediated Oxidative Stress Response	0.476	0.334195	NaN	0.0104	DNAJC19,DNAJC15
Mitotic Roles of Polo-Like Kinase	0.474	0.335738	NaN	0.0152	PPM1J,
Lymphotoxin β Receptor Signaling	0.469	0.339625	NaN	0.0149	TNFSF14,
Clathrin-mediated Endocytosis Signaling	0.464	0.343558	NaN	0.0102	F2R,FGF13
IL-8 Signaling	0.464	0.343558	NaN	0.0102	RHOH,RHOB
Agrin Interactions at Neuromuscular Junction	0.459	0.347536	NaN	0.0145	ARHGEF6,
3-phosphoinositide Biosynthesis	0.459	0.347536	NaN	0.0101	Ppp1cc,FIG4
Role of JAK1 and JAK3 in γc Cytokine Signaling	0.449	0.355631	NaN	0.0141	IL2RB,
Breast Cancer Regulation by Stathmin1	0.448	0.356451	NaN	0.00985	ARHGEF6,PPM1J
Basal Cell Carcinoma Signaling	0.444	0.359749	NaN	0.0139	FZD5,
Ephrin B Signaling	0.439	0.363915	NaN	0.0137	GNAL,
T Helper Cell Differentiation	0.439	0.363915	NaN	0.0137	IL18R1,
Leukocyte Extravasation Signaling	0.429	0.372392	NaN	0.00952	RHOH,THY1
Heparan Sulfate Biosynthesis (Late Stages)	0.425	0.375837	NaN	0.0132	HS3ST3B1,
IL-15 Signaling	0.425	0.375837	NaN	0.0132	IL2RB,
Role of Wnt/GSK-3β Signaling in the Pathogenesis of Influenza	0.425	0.375837	NaN	0.0132	FZD5,
Regulation of IL-2 Expression in Activated and Anergic T Lymphocytes	0.412	0.387258	NaN	0.0127	TOB1,
Integrin Signaling	0.407	0.391742	NaN	0.00913	RHOH,RHOB
Renal Cell Carcinoma Signaling	0.404	0.394457	NaN	0.0123	FH,
EIF2 Signaling	0.402	0.396278	NaN	0.00905	Ppp1cc,RPS7
cAMP-mediated signaling	0.397	0.400867	NaN	0.00897	HCAR2,GNAL
Heparan Sulfate Biosynthesis	0.396	0.401791	NaN	0.012	HS3ST3B1,
Bladder Cancer Signaling	0.38	0.416869	NaN	0.0115	FGF13,
Neuregulin Signaling	0.376	0.420727	NaN	0.0114	MATK,
FGF Signaling	0.369	0.427563	NaN	0.0111	FGF13,
IL-1 Signaling	0.365	0.431519	NaN	0.011	GNAL,
Factors Promoting Cardiogenesis in Vertebrates	0.362	0.43451	NaN	0.0109	FZD5,
Reelin Signaling in Neurons	0.362	0.43451	NaN	0.0109	ARHGEF6,
Ceramide Signaling	0.358	0.438531	NaN	0.0108	PPM1J,
Salvage Pathways of Pyrimidine Ribonucleotides	0.352	0.444631	NaN	0.0105	SGK1,
TR/RXR Activation	0.342	0.454988	NaN	0.0102	NCOR2,
CTLA4 Signaling in Cytotoxic T Lymphocytes	0.339	0.458142	NaN	0.0101	PPM1J,
FAK Signaling	0.339	0.458142	NaN	0.0101	ARHGEF6,
PAK Signaling	0.332	0.465586	NaN	0.0099	ARHGEF6,
Mouse Embryonic Stem Cell Pluripotency	0.317	0.481948	NaN	0.00943	FZD5,
Gαs Signaling	0.309	0.490908	NaN	0.00917	HCAR2,
p53 Signaling	0.303	0.497737	NaN	0.00901	JMY,
G-Protein Coupled Receptor Signaling	0.3	0.501187	NaN	0.00735	HCAR2,GNAL
Paxillin Signaling	0.298	0.503501	NaN	0.00885	ARHGEF6,
HIF1α Signaling	0.293	0.509331	NaN	0.0087	EGLN1,
Pancreatic Adenocarcinoma Signaling	0.285	0.5188	NaN	0.00847	BRCA2,
Gαi Signaling	0.28	0.524807	NaN	0.00833	HCAR2,
Synaptic Long Term Potentiation	0.28	0.524807	NaN	0.00833	Ppp1cc,
LXR/RXR Activation	0.277	0.528445	NaN	0.00826	NCOR2,
Role of NANOG in Mammalian Embryonic Stem Cell Pluripotency	0.275	0.530884	NaN	0.0082	FZD5,
iCOS-iCOSL Signaling in T Helper Cells	0.275	0.530884	NaN	0.0082	IL2RB,
PI3K/AKT Signaling	0.27	0.537032	NaN	0.00806	PPM1J,
Atherosclerosis Signaling	0.263	0.545758	NaN	0.00787	TNFSF14,
Gα12/13 Signaling	0.257	0.55335	NaN	0.00769	F2R,
Role of Macrophages, Fibroblasts and Endothelial Cells in Rheumatoid Arthritis	0.244	0.570164	NaN	0.00647	FZD5,IL18R1
Aryl Hydrocarbon Receptor Signaling	0.236	0.580764	NaN	0.00714	NCOR2,
Th2 Pathway	0.218	0.605341	NaN	0.00667	IL2RB,
Relaxin Signaling	0.214	0.610942	NaN	0.00658	GNAL,
CREB Signaling in Neurons	0	1	NaN	0.00543	GNAL,
Cdc42 Signaling	0	1	NaN	0.00599	ARHGEF6,
ERK/MAPK Signaling	0	1	NaN	0.00503	PPM1J,
Endothelin-1 Signaling	0	1	NaN	0.00535	GNAL,
Ephrin Receptor Signaling	0	1	NaN	0.00575	GNAL,
Granulocyte Adhesion and Diapedesis	0	1	NaN	0.00565	THY1,
Hepatic Fibrosis / Hepatic Stellate Cell Activation	0	1	NaN	0.00546	SMAD7,
LPS/IL-1 Mediated Inhibition of RXR Function	0	1	NaN	0.0045	HS3ST3B1,
PPARα/RXRα Activation	0	1	NaN	0.00562	NCOR2,
Protein Kinase A Signaling	0	1	NaN	0.00255	Ppp1cc,
Role of NFAT in Regulation of the Immune Response	0	1	NaN	0.00541	GNAL,
