# Supplementary material for: Transcriptional profiling and biomarker identification reveal tissue specific effects of expanded ataxin-3 in a spinocerebellar ataxia type 3 mouse model
Source: Mol Neurodegener. 2018 Jun 22;13:31. doi: 10.1186/s13024-018-0261-9 (PMC6013885; doi:10.1186/s13024-018-0261-9)
Supplement: Supplementary file 9 — Blood metabolites. (XLSX 38 kb) [file 13024_2018_261_MOESM9_ESM.xlsx]

## Sheet: supplementary file 1
								4 months		12 months		16 months
NVAR	m/z	Retention Time (min)	Compound Name	ChEBI ID	Ion	Formula	Level of annotation	Fold change	Welch's t-test	Fold change	Welch's t-test	Fold change	Welch's t-test
N213	308.099	13.73	(-)-N-Acetylneuraminic acid	45744	[M-H]-	C11H19NO9	1	1.25	0.0602216	1.03	0.886249	1.25	0.259119
P32	232.154	7.76	(R)-Butyryl carnitine	7676	[M+H]+	C11H21NO4	1	1.32	0.309591	1.11	0.965193	1.08	0.740168
P71	282.12	8.81	1-Methyladenosine	16020	[M+H]+	C11H15N5O4	1	1.24	0.102415	0.96	0.662873	1.27	0.30083
P6	170.092	11.77	1-Methylhistidine	50599	[M+H]+	C7H11N3O2	1	1.16	0.365055	1.05	0.925676	1.01	0.867674		pvalue<0.05
N39	117.056	3.62	2-Hydroxypentanoic acid // 2-Hydroxy 3-methylbutyric acid (α-Hydroxyisovaleric acid)	60647 // 60645	[M-H]-	C5H10O3	1	1.71	0.154069	1.26	0.376474	1.48	0.105851
P30	298.115	8.13	2'-O-Methylguanosine	19702	[M+H]+	C11H15N5O5	1	1.18	0.217361	0.95	0.675511	1.31	0.216003
N186	161.046	13.95	3-Hydroxy-3-methylglutaric acid	16831	[M-H]-	C6H10O5	1	1.11	0.749838	0.87	0.436331	1.19	0.41133
N11	175.061	14.21	3-isopropylmalic acid // 2-Isopropylmalic acid	35114 // 35128	[M-H]-	C7H12O5	1	1.52	0.0645973	1.21	0.483337	0.88	0.45861
N6	168.078	12.13	3-Methylhistidine	27596	[M-H]-	C7H11N3O2	1	1.19	0.412025	0.82	0.209873	0.85	0.0827781
P5	170.092	12.12	3-Methylhistidine // α-Methyl-DL-histidine // 1-Methylhistidine	27596 // 27596 // 50599	[M+H]+	C7H11N3O2	1	0.98	0.966224	0.81	0.160484	0.85	0.0642009
P100	133.061	11.93	3-Ureidopropionic acid	18261	[M+H]+	C4H8N2O3	1	1.78	0.182822	1.27	0.630964	0.88	0.625212
P82	146.092	14.53	4-Guanidinobutyric acid	15728	[M+H]+	C5H11N3O2	1	2.45	0.0093636	1.46	0.454089	0.75	0.0978363
N209	263.023	4.75	4-Hydroxy-3-methoxyphenylglycol sulfate	89644	[M-H]-	C9H12O7S	1	1.58	0.216293	1.3	0.604561	1.07	0.783429
N136	138.02	2.35	4-Nitrophenol	16836	[M-H]-	C6H5NO3	1	1.35	0.0738599	0.93	0.315196	1	0.986472
N187	182.046	2.22	4-Pyridoxic acid	17405	[M-H]-	C8H9NO4	1	1.56	0.118104	0.95	0.586034	0.95	0.830446
P45	242.114	7.41	5-Methyldeoxycytidine	27964	[M+H]+	C10H15N3O4	1	1.28	0.117725	0.96	0.675214	1.01	0.880499
P38	166.072	7.27	7-methylguanine	28664	[M+H]+	C6H7N5O	1	1.33	0.101373	1.27	0.632244	1.13	0.565588
P146	204.123	10.67	Acetyl-L-carnitin	73024	[M+H]+	C9H17NO4	1	1.07	0.613237	0.76	0.194975	1.55	0.126234
N29	134.047	6.21	Adenine	16708	[M-H]-	C5H5N5	1	0.34	0.824976	5.06	0.0377352	3.16	0.621951
P25	136.062	5.9	Adenine	16708	[M+H]+	C5H5N5	1	0.72	0.701685	2.88	0.0280753	2.53	0.358602
N141	157.037	11.8	Allantoin	15676	[M-H]-	C4H6N4O3	1	1.31	0.194057	0.99	0.881813	0.97	0.880261
N37	160.062	14.91	Alpha-D-Aminoadipic acid	37024	[M-H]-	C6H11NO4	1	0.83	0.101548	0.55	0.00880804	0.68	0.154058
N125	173.104	17.85	Arginine	16467	[M-H]-	C6H14N4O2	1	1.26	0.0652313	0.87	0.334706	1	0.930485
P95	175.119	17.84	Arginine	16467	[M+H]+	C6H14N4O2	1	1.16	0.0547879	0.92	0.29947	1	0.951352
P130	291.13	15.99	Argininosuccinic acid	15682	[M+H]+	C10H18N4O6	1	1.37	0.0637341	1.06	0.776956	1.29	0.109894
P19	133.061	13.61	Asparagine	17196	[M+H]+	C4H8N2O3	1	1.01	0.99484	0.68	0.00269884	0.81	0.225134
N115	187.098	12.11	Azelaic acid	48131	[M-H]-	C9H16O4	1	2.08	0.140007	0.92	0.967196	0.79	0.17475
P107	118.086	9.94	Betaine	17750	[M+H]+	C5H11NO2	1	1.02	0.965895	0.73	0.119489	1.11	0.658861
P34	245.077	10.9	beta-Pseudouridine	17802	[M+H]+	C9H12N2O6	1	1.28	0.118598	1.4	0.319342	1.07	0.534752
P155	162.112	13.17	Carnitine	11060	[M+H]+	C7H15NO3	1	0.99	0.973802	0.89	0.280785	1.14	0.138618
P83	227.114	14.28	Carnosine	15727	[M+H]+	C9H14N4O3	1	0.58	0.191142	1.89	0.149565	2.58	0.135852
N148	129.019	14.56	Citraconic acid // Glutaconic acid // Itaconic acid // Mesaconic acid	17626 // 15670 // 30838 // 16600	[M-H]-	C5H6O4	1	1.39	0.0657006	0.88	0.430248	0.81	0.177044
N193	130.062	14.1	Creatine	16919	[M-H]-	C4H9N3O2	1	1.23	0.152526	0.78	0.141681	1.15	0.246811
P131	132.077	14.11	Creatine	16919	[M+H]+	C4H9N3O2	1	1.16	0.206508	0.85	0.188444	1.08	0.327359
P1	244.093	10.54	Cytidine	17562	[M+H]+	C9H13N3O5	1	1.13	0.654368	0.74	0.552341	2.14	0.113821
P47	112.051	8.77	Cytosine	16040	[M+H]+	C4H5N3O	1	1.09	0.457168	0.99	0.795699	1.1	0.354096
N185	151.061	11.57	D-(+)-Arabitol // Adonitol	893310 // 15963	[M-H]-	C5H12O5	1	1.09	0.373632	1.44	0.0665951	1.17	0.235393
N150	147.03	14.58	D-2-Hydroxyglutaric acid	32796	[M-H]-	C5H8O5	1	1.19	0.0602139	0.88	0.341993	1.03	0.825217
N61	226.083	8.78	Deoxycytidine	15698	[M-H]-	C9H13N3O4	1	1.1	0.377141	0.96	0.784371	1.07	0.687179
N153	193.035	15.18	D-Galacturonic acid // D-(+)-Galacturonic acid // D-Glucuronic acid	47962 // 47962 // 28860/42717	[M-H]-	C6H10O7	1	0.9	0.338346	1.01	0.863728	1.38	0.172996
N154	105.019	11.18	D-Glyceric acid	32398	[M-H]-	C3H6O4	1	1.04	0.778684	0.68	0.0233971	0.89	0.226191
N113	203.083	10.53	DL-Tryptophan	27897	[M-H]-	C11H12N2O2	1	1.12	0.517274	0.6	0.0198738	0.72	0.0256609
P87	205.097	10.56	DL-Tryptophan	27897	[M+H]+	C11H12N2O2	1	1.12	0.408326	0.66	0.0291547	0.74	0.0199161
P96	130.05	10.77	D-Pyroglutamic acid	16010	[M+H]+	C5H7NO3	1	1.02	0.894348	1.06	0.579818	0.93	0.575424
N46	181.072	13.04	Dulcitol // D-Mannitol	16813 // 16899	[M-H]-	C6H14O6	1	0.96	0.650069	1.09	0.725516	1.01	0.86577
N217	195.051	13.41	Gluconic acid	33198	[M-H]-	C6H12O7	1	0.85	0.353844	0.64	0.0745026	1.3	0.595939
P75	118.061	14.8	Guanidineacetic acid	16344	[M+H]+	C3H7N3O2	1	1.16	0.429147	1.19	0.327869	1.23	0.619758
P10	260.186	5.16	Hexanoylcarnitine	70749	[M+H]+	C13H25NO4	1	1.02	0.917677	1.45	0.545166	2.39	0.140367
N88	154.062	13.48	Histidine	15971	[M-H]-	C6H9N3O2	1	1.11	0.50993	0.92	0.653441	0.87	0.247877
P64	156.077	13.42	Histidine	15971	[M+H]+	C6H9N3O2	1	1.21	0.195369	0.82	0.0803085	1.02	0.907778
P62	127.05	11.17	Imidazoleacetic acid	16974	[M+H]+	C5H6N2O2	1	1.15	0.41516	1.66	0.367759	1.17	0.462114
P85	157.061	11.08	Imidazolelactic acid	27487	[M+H]+	C6H8N2O3	1	1.29	0.145897	0.84	0.448497	0.95	0.702642
N51	188.072	4.46	Indole-3-propionic acid	43580	[M-H]-	C11H11NO2	1	1.4	0.703347	0.61	0.608647	1.1	0.903979
N42	212.002	2.62	Indoxyl sulfate	43355	[M-H]-	C8H7NO4S	1	1.76	0.365555	0.71	0.197501	1.67	0.423274
N147	129.019	16	Itaconic acid // Mesaconic acid	30838 // 16600	[M-H]-	C5H6O4	1	1.11	0.120924	0.84	0.168089	1.11	0.592318
P76	190.05	3.98	Kynurenic acid	18344	[M+H]+	C10H7NO3	1	1.3	0.990961	0.97	0.666844	0.92	0.966956
N225	174.088	14.62	L-Citrulline	16349	[M-H]-	C6H13N3O3	1	1.51	0.00862686	1.2	0.180168	1.18	0.265047
P153	176.103	14.61	L-Citrulline	16349	[M+H]+	C6H13N3O3	1	1.42	0.0311999	1.16	0.147266	1.06	0.566546
N103	239.017	14.87	L-Cystine	16283	[M-H]-	C6H12N2O4S2	1	1.11	0.43042	1	0.852069	1.12	0.453166
N89	146.046	14.73	L-Glutamic acid	16015	[M-H]-	C5H9NO4	1	0.94	0.669657	0.78	0.393577	1.07	0.774291
P65	148.06	14.76	L-Glutamic acid	16015	[M+H]+	C5H9NO4	1	0.9	0.604499	0.69	0.291011	1.18	0.655782
N96	145.062	13.77	L-Glutamine // D-Glutamine	18050 // 17061	[M-H]-	C5H10N2O3	1	1.02	0.604263	1.01	0.796244	1	0.933503
P72	147.076	13.8	L-Glutamine // D-Glutamine	18050 // 17061	[M+H]+	C5H10N2O3	1	1.06	0.421968	0.98	0.724968	0.99	0.873785
P60	120.066	13.15	L-Homoserine // Threonine // D-allo-Threonine	15699 // 16857 // 28718	[M+H]+	C4H9NO3	1	1.04	0.663734	0.7	0.0445833	0.87	0.276562
P110	209.092	9.57	L-Kynurenine	16946	[M+H]+	C10H12N2O3	1	1.37	0.195348	0.91	0.595076	0.9	0.949034
P2	132.102	9.71	L-Norleucine // Isoleucine // Leucine	18347 // 17191 // 15603	[M+H]+	C6H13NO2	1	1.44	0.0890815	0.76	0.0618256	0.78	0.377461
P3	132.102	10.33	L-Norleucine // Isoleucine // Leucine	18347 // 17191 // 15603	[M+H]+	C6H13NO2	1	0.99	0.862617	0.67	0.101836	1.05	0.850116
P97	130.05	13.78	L-Pyroglutamic acid	18183	[M+H]+	C5H7NO3	1	1.06	0.412691	0.98	0.664613	0.99	0.768991
N165	135.03	12.39	L-Threonic acid	15908	[M-H]-	C4H8O5	1	0.92	0.521794	0.55	0.000950888	0.95	0.796152
P69	147.113	17.33	Lysine	18019	[M+H]+	C6H14N2O2	1	1.17	0.129238	0.7	0.075204	0.98	0.865274
N52	133.014	14.97	Malic acid	6650	[M-H]-	C4H6O5	1	1.23	0.210803	0.81	0.308504	0.91	0.693728
P15	150.058	10.5	Methionine	16643	[M+H]+	C5H11NO2S	1	1.15	0.257572	0.88	0.400039	0.82	0.11134
P68	141.066	8.53	Methylimidazoleacetic acid	1606	[M+H]+	C6H8N2O2	1	2.01	0.0166309	1.58	0.561201	0.91	0.842818
N208	179.056	16.12	Myo-inositol	17268	[M-H]-	C6H12O6	1	1.49	0.220908	0.94	0.786359	1.33	0.386684
P150	189.087	11.09	N acetyl L glutamine	73685	[M+H]+	C7H12N2O4	1	1.01	0.97873	0.59	0.00284385	1.09	0.702974
P136	104.071	11.13	N,N-Dimethylglycine	17724	[M+H]+	C4H9NO2	1	1.56	0.0913077	1.89	0.0171301	1.2	0.449164
P13	286.103	5.14	N4-Acetylcytidine	70989	[M+H]+	C11H15N3O6	1	0.7	0.318372	1.14	0.596013	0.86	0.502854
P135	189.16	16.78	N6,N6,N6-Trimethyl-L-lysine	17311	[M+H]+	C9H20N2O2	1	1.5	0.0208138	1.2	0.535731	1.17	0.400501
N197	187.109	12.56	N6-Acetyl-L-lysine	17752	[M-H]-	C8H16N2O3	1	1.32	0.0699635	1.02	0.96951	0.98	0.812669
N28	245.093	4.7	N-acetyl-DL-tryptophan	74640	[M-H]-	C13H14N2O3	1	1.34	0.11219	0.89	0.702886	0.92	0.673434
P24	247.108	4.74	N-acetyl-DL-tryptophan	74640	[M+H]+	C13H14N2O3	1	0.87	0.562739	0.72	0.283919	0.95	0.831363
P31	269.124	10.94	N-Acetyl-L-carnosine	67249	[M+H]+	C11H16N4O4	1	0.91	0.571908	1.14	0.703844	1.36	0.143624
N120	190.054	4.15	N-Acetyl-L-methionine	165927	[M-H]-	C7H13NO3S	1	1.3	0.102628	0.64	0.170937	1.06	0.820449
N174	324.094	14.6	N-Glycolylneuraminic acid	62084	[M-H]-	C11H19NO10	1	1.2	0.205918	1.29	0.472014	2.22	0.141451
P119	123.055	3.11	Nicotinamide	17154	[M+H]+	C6H6N2O	1	0.79	0.302268	0.53	0.053395	1.62	0.33144
P17	139.05	5.67	Nicotinamide N-oxide	89640	[M+H]+	C6H6N2O2	1	0.98	0.879921	0.96	0.845585	0.77	0.372859
P37	217.13	14.76	N-α-acetyl-L-arginine	40521	[M+H]+	C8H16O3N4	1	1.95	0.00287708	1.25	0.302616	1.02	0.768461
P138	148.06	11.09	O-Acetyl-L-serine	17981	[M+H]+	C5H9NO4	1	1	0.748833	0.94	0.664991	0.99	0.910552
P50	133.097	16.49	Ornithine	15729	[M+H]+	C5H12N2O2	1	1.12	0.316412	0.93	0.677375	0.83	0.151549
P118	220.118	7.97	Pantothenic acid	7916	[M+H]+	C9H17NO5	1	0.91	0.608417	0.86	0.725912	1.19	0.095418
N104	164.072	8.31	Phenylalanine	17295	[M-H]-	C9H11NO2	1	1.26	0.166626	0.84	0.439223	0.98	0.816908
N105	164.072	8.02	Phenylalanine	17295	[M-H]-	C9H11NO2	1	1.81	0.0205231	0.74	0.213845	0.98	0.774207
P78	166.086	8.34	Phenylalanine	17295	[M+H]+	C9H11NO2	1	1.16	0.398574	0.79	0.205542	0.99	0.811084
P79	166.086	7.97	Phenylalanine	17295	[M+H]+	C9H11NO2	1	1.43	0.0785472	0.73	0.081292	1	0.929287
N7	163.04	2.31	Phenylpyruvic acid	30851	[M-H]-	C9H8O3	1	1.39	0.393169	0.94	0.876437	0.88	0.46714
P81	130.086	11.6	Pipecolinic acid	17964	[M+H]+	C6H11NO2	1	1.39	0.104337	1.12	0.597356	1	0.940517
P61	116.071	11.99	Proline	17203	[M+H]+	C5H9NO2	1	1.09	0.444495	0.75	0.144213	0.92	0.570174
P28	218.139	9.14	Propionylcarnitine	28867	[M+H]+	C10H19NO4	1	1.13	0.480639	0.79	0.176905	1.26	0.193721
P140	377.146	6.67	Riboflavin	17015	[M+H]+	C17H20N4O6	1	1.29	0.216389	1.08	0.779933	1.11	0.333533
N133	104.035	14	Serine	17115	[M-H]-	C3H7NO3	1	0.95	0.456579	0.89	0.396502	0.88	0.282294
P99	106.05	13.95	Serine	17115	[M+H]+	C3H7NO3	1	1.1	0.54726	0.76	0.14926	0.94	0.675144
N184	378.241	8.97	Sphingosine 1-phosphate	392583	[M-H]-	C18H38NO5P	1	0.88	0.460208	0.73	0.0687915	1.24	0.507028
P125	380.256	8.98	Sphingosine 1-phosphate	392583	[M+H]+	C18H38NO5P	1	1.03	0.852162	0.72	0.0568483	1.29	0.450199
P26	144.102	9.2	Stachydrine	35280	[M+H]+	C7H13NO2	1	1.35	0.297784	0.85	0.650775	0.93	0.854927
P94	126.022	12.92	Taurine	15891	[M+H]+	C2H7NO3S	1	1.06	0.825171	0.85	0.536597	1.51	0.151212
N119	118.051	13.18	Threonine // D-allo-Threonine	16857 // 28718	[M-H]-	C4H9NO3	1	1.06	0.592428	0.76	0.118152	0.77	0.0381757
P145	150.112	4	Triethanolamine	28621	[M+H]+	C6H15NO3	1	0.14	0.947463	44.11	0.406893	0.74	0.814112
P43	138.055	10.59	Trigonelline	18123	[M+H]+	C7H7NO2	1	1.59	0.0892893	1.22	0.718716	0.95	0.934874
N8	180.067	11.61	Tyrosine	17895	[M-H]-	C9H11NO3	1	1.03	0.763424	0.6	0.0536337	0.79	0.144263
P9	182.081	11.6	Tyrosine	17895	[M+H]+	C9H11NO3	1	1.05	0.708543	0.61	0.0487682	0.8	0.0993327
P55	113.035	4.69	Uracil	17568	[M+H]+	C4H4N2O2	1	0.9	0.506611	0.97	0.688713	1.09	0.456423
N108	167.021	12.05	Uric acid	17775	[M-H]-	C5H4N4O3	1	0.04	0.609808	1.07	0.457162	0.82	0.415922
P90	118.086	11.25	Valine	16414	[M+H]+	C5H11NO2	1	1.11	0.423749	0.72	0.0132378	0.96	0.615418
N140	145.014	14.46	α-Ketoglutaric acid	30915	[M-H]-	C5H6O5	1	1.12	0.477041	0.77	0.0780737	0.82	0.142839
N128	163.061	10.22	1,5-Anhydro-D-sorbitol	16070	[M-H]-	C6H12O5	2	1.41	0.0106592	1.06	0.716651	1.04	0.783558
N83	345.207	2.2	21-Deoxycortisol // Corticosterone	NF // 16827	[M-H]-	C21H30O4	2	1.36	0.316548	1.83	0.227823	1.42	0.598765
N155	102.056	12.5	2-Aminoisobutyric acid (2-Methylalanine) // L-2-Aminobutyric acid (L-α-Aminobutyric acid)	27971 // 35619	[M-H]-	C4H9NO2	2	2.24	0.1313	2.58	0.00237732	1.23	0.495575
N33	296.1	8.17	2'-O-Methylguanosine	19702	[M-H]-	C11H15N5O5	2	1.19	0.306583	0.99	0.915764	1.43	0.525873
P128	154.05	3.34	3-Aminosalicylic acid	1162549	[M+H]+	C7H7NO3	2	1.4	0.701241	1.04	0.876132	0.82	0.695896
N80	187.134	2.18	3-hydroxydecanoic acid // 10-hydroxydecanoic acid	NF // 17409	[M-H]-	C10H20O3	2	1.51	0.00474942	0.87	0.47519	1.71	0.0786177
N10	129.056	2.35	3-Methyl-2-oxovaleric acid // 2-Ketohexanoic acid // 4-Methyl-2-oxovaleric acid	35932 // 17308 // 48430	[M-H]-	C6H10O3	2	1.34	0.478419	0.66	0.0283593	1.04	0.902564
P33	158.081	3.98	3-Methylcrotonyl glycine // N-Tiglylglycine	68499 // 73018	[M+H]+	C7H11NO3	2	1.58	0.273134	0.54	0.375233	1.83	0.219498
N135	131.046	11.96	3-Ureidopropionic acid	18261	[M-H]-	C4H8N2O3	2	1.83	0.109749	1.1	0.988023	0.9	0.541368
N190	130.051	13.68	5-Aminolevulinic acid // trans-4-hydroxy-L-proline // trans-3-Hydroxy-L-proline // cis-4-hydroxy-D-proline	17549 // 18095 // 16889 // 16231	[M-H]-	C5H9NO3	2	0.98	0.791829	0.63	0.00614913	0.71	0.167712
N20	137.036	10.93	5-Aminopyridine-3-carboxylic acid	68578	[M-H]-	C6H6N2O2	2	1.02	0.943807	1.64	0.212122	0.79	0.44834
P16	139.05	10.94	5-Aminopyridine-3-carboxylic acid	68578	[M+H]+	C6H6N2O2	2	1.09	0.890939	1.7	0.187212	0.8	0.444786
N27	135.056	2.43	6-Methylnicotinamide // N-Methylnicotinamide // 2-Methylnicotinamide	88954 // 64399 // 64399	[M-H]-	C7H8N2O	2	1.81	0.248074	0.57	0.425754	2.93	0.312211
P23	137.071	2.44	6-Methylnicotinamide // N-Methylnicotinamide // 2-Methylnicotinamide	88954 // 64399 // 64399	[M+H]+	C7H8N2O	2	1.01	0.940683	0.55	0.11445	1.55	0.333756
P120	268.104	5.88	Adenosine	16335	[M+H]+	C10H13N5O4	2	0.33	0.755408	4.96	0.0533082	3.06	0.736896
P158	259.104	9.04	AICAR	18406	[M+H]+	C9H14N4O5	2	2.11	0.748353	3.75	0.310597	1.79	0.821788
N22	131.046	13.64	Asparagine	17196	[M-H]-	C4H8N2O3	2	0.94	0.479515	0.74	0.00724704	0.8	0.131091
N146	171.139	2.14	Capric acid	30813	[M-H]-	C10H20O2	2	1.34	0.101279	1.15	0.312027	0.95	0.730653
N48	200.129	2.45	Caprylolyglycine	74099	[M-H]-	C10H19NO3	2	1.63	0.0276753	1.38	0.190462	1.22	0.34672
N230	112.052	6.34	Creatinine	16737	[M-H]-	C4H7N3O	2	1.41	0.0505251	1.13	0.940091	0.91	0.549571
P160	114.066	6.47	Creatinine	16737	[M+H]+	C4H7N3O	2		0.111834		0.946876		0.975706
N1	242.078	10.58	Cytidine	17562	[M-H]-	C9H13N3O5	2	1.07	0.852171	0.68	0.39741	2.27	0.077739
N152	159.078	11.09	D-Ala-D-Ala	16576	[M-H]-	C6H12N2O3	2	1.93	0.398789	0.85	0.933005	0.62	0.276136
N151	159.078	12.6	D-Ala-D-Ala	16576	[M-H]-	C6H12N2O3	2	1.56	0.038911	0.86	0.19761	0.84	0.283608
N123	149.046	11.65	D-Arabinose	46983	[M-H]-	C5H10O5	2	1.46	0.0840392	1.25	0.432691	0.95	0.591573
N101	173.009	16	Dehydroascorbic acid // cis-Aconitic acid	17242 // 32805	[M-H]-	C6H6O6	2	1.09	0.21304	0.85	0.175483	1.12	0.588926
P48	228.098	8.77	Deoxycytidine	15698	[M+H]+	C9H13N3O4	2	1.17	0.209454	1.03	0.948545	1.14	0.307921
N131	113.036	3.24	Dihydrouracil	15901	[M-H]-	C4H6N2O2	2	1.14	0.145307	0.67	0.118218	1.36	0.361945
N53	215.165	2.06	DL-beta-Hydroxylauric acid // 12-Hydroxydodecanoic acid	36206 // 39567	[M-H]-	C12H24O3	2	1.02	0.952174	0.91	0.706495	1.48	0.250456
N228	157.025	11.09	DL-Dihydroorotic acid	17025	[M-H]-	C5H6N2O4	2	1.61	0.00192575	1.03	0.871903	0.95	0.71271
N210	229.145	10.14	Dodecanedioic acid	4676	[M-H]-	C12H22O4	2	1.58	0.237147	0.89	0.493284	1.01	0.965164
N17	148.044	10.51	D-Penicillamine // Methionine	50868 // 16643	[M-H]-	C5H11NO2S	2	1.15	0.199248	0.8	0.272304	0.78	0.176543
N127	128.035	10.78	D-Pyroglutamic acid	16010	[M-H]-	C5H7NO3	2	0.78	0.293128	1.09	0.566451	0.96	0.690867
N122	121.051	9.42	D-Threitol // Erythritol	48300 // 17113	[M-H]-	C4H10O4	2	1.63	0.0608029	1.42	0.42858	0.93	0.843926
N24	149.046	13.54	D-Xylose	53455	[M-H]-	C5H10O5	2	0.97	0.537799	0.91	0.320459	0.78	0.0976478
N49	115.004	14.97	Fumaric acid // Maleic acid	18012 // 18300	[M-H]-	C4H4O4	2	1.24	0.148741	0.83	0.362305	0.92	0.644231
N44	259.022	16.04	Galactose 1-phosphate // Glucose 1-phosphate // α-D(+)Mannose 1-phosphate // D-Fructose 1-phosphate // D-Mannose 6-phosphate // Glucose-6-PO4 // D-Fructose 6-phosphate	17973 // 16077 // 35374 // 704854 // 49728 // 4170 // 15946	[M-H]-	C6H13O9P	2	0.87	0.584087	0.74	0.953824	3.07	0.119804
N21	171.006	14.87	Glycerol 3-phosphate	15978	[M-H]-	C3H9O6P	2	1.26	0.0978952	0.9	0.346608	1.13	0.454932
P18	173.021	14.94	Glycerol 3-phosphate	15978	[M+H]+	C3H9O6P	2	1.09	0.485643	0.9	0.881343	1.74	0.184565
N158	282.084	11.69	Guanosine	16750	[M-H]-	C10H13N5O5	2	0.78	0.462808	1.66	0.129726	1.03	0.671849
N160	149.061	2.52	Hydrocinnamic acid	28631	[M-H]-	C9H10O2	2	1.14	0.822527	0.51	0.184128	0.54	0.181405
N161	267.074	10.43	Inosine	17596	[M-H]-	C10H12N4O5	2	0.55	0.338706	1.67	0.182229	1.04	0.52079
P111	269.088	10.34	Inosine	17596	[M+H]+	C10H12N4O5	2	0.55	0.288374	1.75	0.163796	1.01	0.458279
N198	256.096	14.81	L-a-Glycerophosphorylcholine	16870	[M-H]-	C8H20NO6P	2	1.32	0.167543	0.91	0.387905	0.92	0.352378
N163	239.115	13.27	L-Anserine	18323	[M-H]-	C10H16N4O3	2	0.87	0.510122	1.69	0.179391	0.87	0.474249
N100	120.012	14.87	L-Cysteine	17561	[M-H]-	C3H7NO2S	2	1.13	0.382887	1	0.840627	1.13	0.398243
N159	207.078	9.7	L-Kynurenine	16946	[M-H]-	C10H12N2O3	2	1.36	0.0403286	0.79	0.248611	1.01	0.808699
N2	130.087	10.39	L-Norleucine // Isoleucine // Leucine	18347 // 17191 // 15603	[M-H]-	C6H13NO2	2	0.9	0.526359	0.72	0.260172	1.06	0.776992
N3	130.087	9.68	L-Norleucine // Isoleucine // Leucine	18347 // 17191 // 15603	[M-H]-	C6H13NO2	2	1.34	0.178661	0.57	0.0376533	1.15	0.60097
N126	128.035	13.75	L-Pyroglutamic acid	18183	[M-H]-	C5H7NO3	2	1.05	0.364154	1	0.922574	1.01	0.755908
N200	102.056	11.14	N,N-Dimethylglycine	17724	[M-H]-	C4H9NO2	2	1.47	0.171913	1.05	0.867986	0.93	0.740553
N68	220.083	10.62	N-Acetylgalactosamine // N-Acetylmannosamine // N-Acetyl-D-glucosamine	40356 // 63154 // 506227	[M-H]-	C8H15NO6	2	1.43	0.33677	0.48	0.145897	1.35	0.889269
N118	116.035	10.57	N-Acetylglycine	40410	[M-H]-	C4H7NO3	2	1.25	0.461094	1.09	0.991147	2.24	0.2535
N170	174.041	14.35	N-Acetyl-L-aspartic acid	21547	[M-H]-	C6H9NO5	2	1.06	0.976145	0.82	0.924247	2.01	0.241257
N34	267.11	10.91	N-Acetyl-L-carnosine	67249	[M-H]-	C11H16N4O4	2	0.79	0.397309	1.08	0.855604	1.36	0.176769
N172	176.039	4.62	N-Formyl-L-methionine	16552	[M-H]-	C6H11NO3S	2	1.11	0.51782	0.93	0.714868	1.23	0.279751
N175	121.041	3.12	Nicotinamide	17154	[M-H]-	C6H6N2O	2	1.07	0.995735	0.63	0.101794	1.8	0.354687
N36	144.067	4.83	N-Isobutyrylglycine	70979	[M-H]-	C6H11NO3	2	1.41	0.277524	1.04	0.990356	1.6	0.174152
N176	157.123	2.2	Nonanoic acid	29019	[M-H]-	C9H18O2	2	1.73	0.057841	1.13	0.425082	1.05	0.809132
N220	173.057	11.59	Nα-Acetyl-L-asparagine	NF	[M-H]-	C6H10N2O4	2	3.12	0.278308	0.58	0.0362459	0.85	0.0609144
N177	143.108	2.35	Octanoic acid	28837	[M-H]-	C8H16O2	2	1.38	0.0853154	1	0.833296	1.04	0.906894
N71	131.083	16.54	Ornithine	15729	[M-H]-	C5H12N2O2	2	1.11	0.447899	0.79	0.325209	0.79	0.286504
N91	155.01	9.27	Orotic acid	16742	[M-H]-	C5H4N2O4	2	1.44	0.0306103	1.19	0.856879	1.04	0.794591
N106	184.002	16.66	Phosphoserine	15811	[M-H]-	C3H8NO6P	2	1.49	0.208382	0.83	0.709021	1.46	0.285737
N107	128.072	11.65	Pipecolinic acid	17964	[M-H]-	C6H11NO2	2	1.5	0.0643321	1.12	0.715643	1.06	0.809348
N85	114.056	12	Proline	17203	[M-H]-	C5H9NO2	2	1.2	0.286898	0.67	0.165702	0.92	0.68077
P121	335.222	2.42	Prostaglandin A2 // Prostaglandin B2	27820 // 28099	[M+H]+	C20H30O4	2	1.27	0.476386	1.29	0.385702	0.88	0.695295
N215	166.015	14.41	Quinolinic acid	16675	[M-H]-	C7H5NO4	2	2.52	0.16854	1.11	0.93802	0.52	0.240355
N74	88.0404	13.52	Sarcosine // Alanine	15611 // 16977	[M-H]-	C3H7NO2	2	1.09	0.863456	0.68	0.0702453	0.97	0.898099
P51	90.055	13.51	Sarcosine // Alanine	15611 // 16977	[M+H]+	C3H7NO2	2	0.97	0.725953	0.7	0.091708	0.92	0.654018
N67	173.082	12.89	Suberic acid	9300	[M-H]-	C8H14O4	2	2.04	0.19817	1.01	0.818984	0.74	0.105147
N79	117.019	14.58	Succinic acid // Methylmalonic acid // Dimethyl oxalate // Erythrono-1,4-lactone (D-Erythronic acid γ-lactone)	15741 // 30860 // 6859 // 290972	[M-H]-	C4H6O4	2	1.18	0.43869	0.7	0.145734	1.2	0.251168
P59	516.299	2.44	Taurocholic acid	28865	[M+H]+	C26H45NO7S	2	1.07	0.650837	1.65	0.0156238	0.57	0.177675
N224	241.083	3.41	Thymidine	17748	[M-H]-	C10H14N2O5	2	0.94	0.570272	1.23	0.46318	1.1	0.404198
N15	125.036	3.39	Thymine	17821	[M-H]-	C5H6N2O2	2	0.95	0.578969	1.19	0.488281	1.09	0.413517
N77	111.02	4.46	Uracil	17568	[M-H]-	C4H4N2O2	2	0.99	0.937274	1.05	0.912129	1.25	0.199583
N116	116.072	11.24	Valine	16414	[M-H]-	C5H11NO2	2	0.96	0.634821	0.72	0.0808913	0.96	0.705441
N109	283.068	11.71	Xanthosine	18107	[M-H]-	C10H12N4O6	2	1.14	0.35571	0.46	0.105557	1.05	0.944258
P20	126.103	12.12	α-Methylhistamine	29009	[M+H]+	C6H11N3	2	0.88	0.804028	0.86	0.261775	0.87	0.0193185
P21	126.103	10.96	α-Methylhistamine	29009	[M+H]+	C6H11N3	2	1.37	0.205488	1.02	0.933502	2.63	0.228437
N156	102.056	14.72	γ-aminobutyric acid	16865	[M-H]-	C4H9NO2	2	0.95	0.701719	0.78	0.44923	1.1	0.543238
