# Supplementary material for: Transcriptional profiling and biomarker identification reveal tissue specific effects of expanded ataxin-3 in a spinocerebellar ataxia type 3 mouse model
Source: Mol Neurodegener. 2018 Jun 22;13:31. doi: 10.1186/s13024-018-0261-9 (PMC6013885; doi:10.1186/s13024-018-0261-9)
Supplement: Supplementary file 11 — Blood lipids. (XLSX 82 kb) [file 13024_2018_261_MOESM11_ESM.xlsx]

## Sheet: 10 months
PLS-DA	error_rate	Q2.global	R2Xcum	R2Ycum
RandomForest	OOB

## Sheet: supplementary file 2
							4 months		12 months		16 months
NVAR	m/z	retention time (min)	Compound Name	ChEBI ID	Class	Family	Fold change	Welch's t-test	Fold change	Welch's t-test	Fold change	Welch's t-test
P27	162.113	0.913758	9200_([M+H]+)_Carnitine_C7H15NO3	CHEBI:17126	Fatty acyl carnitines (FA Carn)	Fatty Acyls	0.69	0.264329	0.79	0.592008	1.13	0.752603
P156	204.124	0.908841	9201_([M+H]+)_C2:0 Carnitine_C9H17NO4	CHEBI:73024	Fatty acyl carnitines (FA Carn)	Fatty Acyls	0.74	0.321307	0.72	0.489876	1.26	0.390982
P711	424.343	3.19624	9218_([M+H]+)_C18:2 Carnitine_C25H45NO4	CHEBI:86480	Fatty acyl carnitines (FA Carn)	Fatty Acyls	0.84	0.461236	0.78	0.921391	1.45	0.482977
P721	426.358	4.19205	9221_([M+H]+)_C18:1 Carnitine_C25H47NO4	CHEBI:86475	Fatty acyl carnitines (FA Carn)	Fatty Acyls	0.74	0.244112	0.74	0.702287	1.47	0.332418
N191	253.219	5.26443	14_([M-H]-)_FA C16:1_C16H30O2	CHEBI:24548	Free fatty acids (FA)	Fatty Acyls	0.62	0.176248	0.45	0.313286	0.55	0.053245		pvalue<0.05
N318	281.25	6.1087	19_([M-H]-)_FA C18:1_C18H34O2	CHEBI:16196	Free fatty acids (FA)	Fatty Acyls	0.89	0.557108	0.72	0.746048	0.94	0.741174
N304	279.235	5.57738	20_([M-H]-)_FA C18:2_C18H32O2	CHEBI:17351	Free fatty acids (FA)	Fatty Acyls	0.84	0.520866	0.75	0.893143	1.09	0.821597
N295	277.219	5.11855	21_([M-H]-)_FA C18:3_C18H30O2	CHEBI:25048	Free fatty acids (FA)	Fatty Acyls	0.8	0.529981	0.83	0.935323	1.24	0.488976
N433	309.282	6.90078	26_([M-H]-)_FA C20:1_C20H38O2	CHEBI:23902	Free fatty acids (FA)	Fatty Acyls	0.95	0.715802	0.55	0.392086	0.73	0.145691
N417	305.25	5.92144	28_([M-H]-)_FA C20:3_C20H34O2	CHEBI:36036	Free fatty acids (FA)	Fatty Acyls	0.96	0.679722	0.69	0.519146	0.93	0.719731
N405	303.235	5.59682	29_([M-H]-)_FA C20:4_C20H32O2	CHEBI:15843	Free fatty acids (FA)	Fatty Acyls	1.1	0.79796	0.86	0.805613	1.15	0.396611
N391	301.219	5.11622	30_([M-H]-)_FA C20:5_C20H30O2	CHEBI:36006	Free fatty acids (FA)	Fatty Acyls	0.85	0.364681	0.78	0.645783	0.85	0.279756
N531	331.266	6.2726	37_([M-H]-)_FA C22:4_C22H36O2	CHEBI:61205	Free fatty acids (FA)	Fatty Acyls	1.22	0.522614	0.71	0.96485	1.04	0.715618
N517	329.25	6.01353	38_([M-H]-)_FA C22:5_C22H34O2	CHEBI:61204	Free fatty acids (FA)	Fatty Acyls	1.38	0.425468	0.82	0.854379	1.24	0.311616
N504	327.235	5.55597	39_([M-H]-)_FA C22:6_C22H32O2	CHEBI:36005	Free fatty acids (FA)	Fatty Acyls	0.9	0.516987	0.59	0.53671	0.74	0.408175
N674	355.267	6.1753	46_([M-H]-)_FA C24:6_C24H36O2	CHEBI:72714	Free fatty acids (FA)	Fatty Acyls	0.84	0.372357	0.43	0.295333	0.74	0.270714
P1650	584.526	10.4071	5454_([M+NH4]+)_DG 32a:1_C35H66O5	CHEBI:85687	Diacylglycerols (DG)	Glycerolipids	0.58	0.201269	0.83	0.594163	1.95	0.0680693
P1897	612.557	11.1014	5481_([M+NH4]+)_DG 34a:1_C37H70O5	CHEBI:85694	Diacylglycerols (DG)	Glycerolipids	0.6	0.241829	1.28	0.404928	3.34	0.0140504
P1879	610.541	10.6383	5485_([M+NH4]+)_DG 34a:2_C37H68O5	CHEBI:85693	Diacylglycerols (DG)	Glycerolipids	0.43	0.212658	1.08	0.624151	4.89	0.00748508
P1858	608.525	10.1826	5486_([M+NH4]+)_DG 34a:3_C37H66O5	CHEBI:85692	Diacylglycerols (DG)	Glycerolipids	0.31	0.111174	0.62	0.715202	2.81	0.0188564
P2086	638.572	11.329	5511_([M+NH4]+)_DG 36a:2_C39H72O5	CHEBI:85701	Diacylglycerols (DG)	Glycerolipids	0.58	0.280706	1.32	0.402408	3.7	0.00249038
P2070	636.557	10.8703	5512_([M+NH4]+)_DG 36a:3_C39H70O5	CHEBI:85700	Diacylglycerols (DG)	Glycerolipids	0.47	0.238395	1.25	0.436755	4.56	0.00548419
P2054	634.541	10.4163	5513_([M+NH4]+)_DG 36a:4_C39H68O5	CHEBI:85699	Diacylglycerols (DG)	Glycerolipids	0.43	0.27017	1.38	0.355468	5.41	0.0176571
P2148	646.541	8.03434	5527_([M+NH4]+)_DG 37a:5_C40H68O5	NF	Diacylglycerols (DG)	Glycerolipids	0.88	0.844221	0.81	0.576766	1.45	0.593185
P2278	660.557	10.8897	5540_([M+NH4]+)_DG 38a:5_C41H70O5	CHEBI:85704	Diacylglycerols (DG)	Glycerolipids	0.68	0.569662	1.79	0.147245	7.25	0.0253782
P2266	658.54	10.4494	5541_([M+NH4]+)_DG 38a:6_C41H68O5	CHEBI:85703	Diacylglycerols (DG)	Glycerolipids	0.61	0.456337	1.62	0.20464	6.98	0.0459959
P2456	684.557	10.8137	5568_([M+NH4]+)_DG 40a:7_C43H70O5	CHEBI:85708	Diacylglycerols (DG)	Glycerolipids	0.51	0.205642	1.02	0.59951	3.79	0.0840635
P2439	682.541	10.3623	5569_([M+NH4]+)_DG 40a:8_C43H68O5	CHEBI:87227	Diacylglycerols (DG)	Glycerolipids	0.46	0.177235	0.94	0.616686	4.06	0.0970565
P3299	794.723	15.7739	5918_([M+NH4]+)_TG 46:1_C49H92O6	CHEBI:85869	Triradylglycerols (TG)	Glycerolipids	0.75	0.165176	0.82	0.459204	1.49	0.0205375
P3279	792.708	15.3175	5928_([M+NH4]+)_TG 46:2_C49H90O6	CHEBI:77447	Triradylglycerols (TG)	Glycerolipids	0.62	0.126445	0.78	0.509365	1.72	0.000160509
P3256	790.692	14.8449	5929_([M+NH4]+)_TG 46:3_C49H88O6	NF	Triradylglycerols (TG)	Glycerolipids	0.49	0.134714	0.76	0.566999	2.27	0.00652431
P3532	824.77	16.9073	5955_([M+NH4]+)_TG 48:0_C51H98O6	CHEBI:85870	Triradylglycerols (TG)	Glycerolipids	0.79	0.268639	1.43	0.278975	1.98	0.00345833
P3519	822.755	16.4703	5956_([M+NH4]+)_TG 48:1_C51H96O6	CHEBI:85726	Triradylglycerols (TG)	Glycerolipids	0.48	0.142425	1.31	0.647823	4.07	0.00169558
P3504	820.739	15.9693	5966_([M+NH4]+)_TG 48:2_C51H94O6	CHEBI:85725	Triradylglycerols (TG)	Glycerolipids	0.33	0.0941891	0.69	0.657677	3.23	0.00774557
P3491	818.723	15.4975	5967_([M+NH4]+)_TG 48:3_C51H92O6	CHEBI:85871	Triradylglycerols (TG)	Glycerolipids	0.32	0.107326	0.57	0.583173	2.97	0.0244055
P3477	816.708	15.0568	5968_([M+NH4]+)_TG 48:4_C51H90O6	CHEBI:85825	Triradylglycerols (TG)	Glycerolipids	0.39	0.145334	0.92	0.875213	3.72	0.0211657
P3637	836.77	16.8209	5975_([M+NH4]+)_TG 49:1_C52H98O6	CHEBI:85728	Triradylglycerols (TG)	Glycerolipids	0.69	0.267218	1.39	0.555099	2.52	0.00250384
P3621	834.755	16.3422	5985_([M+NH4]+)_TG 49:2_C52H96O6	CHEBI:85727	Triradylglycerols (TG)	Glycerolipids	0.53	0.221175	1.1	0.858954	2.74	0.00583546
P3604	832.739	15.8746	5986_([M+NH4]+)_TG 49:3_C52H94O6	CHEBI:85828	Triradylglycerols (TG)	Glycerolipids	0.38	0.16047	0.79	0.898439	2.49	0.0223951
P3736	850.786	17.1567	5994_([M+NH4]+)_TG 50:1_C53H100O6	CHEBI:84665	Triradylglycerols (TG)	Glycerolipids	0.58	0.119684	2.72	0.13207	5.19	0.00487019
P3718	848.771	16.6925	6004_([M+NH4]+)_TG 50:2_C53H98O6	CHEBI:84662	Triradylglycerols (TG)	Glycerolipids	0.36	0.117722	1.27	0.643332	5.06	0.0039435
P3703	846.755	16.2179	6005_([M+NH4]+)_TG 50:3_C53H96O6	CHEBI:85729	Triradylglycerols (TG)	Glycerolipids	0.3	0.0987649	0.74	0.881898	3.21	0.0192921
P3695	844.739	15.729	6006_([M+NH4]+)_TG 50:4_C53H94O6	CHEBI:85832	Triradylglycerols (TG)	Glycerolipids	0.27	0.0971854	0.64	0.792843	2.77	0.0298761
P3683	842.724	15.353	6007_([M+NH4]+)_TG 50:5_C53H92O6	CHEBI:90301	Triradylglycerols (TG)	Glycerolipids	0.33	0.117172	1.27	0.513891	3.88	0.0161979
P3667	840.708	14.9722	6008_([M+NH4]+)_TG 50:6_C53H90O6	CHEBI:85732	Triradylglycerols (TG)	Glycerolipids	0.4	0.162937	1.08	0.694165	4.31	0.0296019
P3864	864.802	17.4861	6013_([M+NH4]+)_TG 51:1_C54H102O6	CHEBI:85733	Triradylglycerols (TG)	Glycerolipids	0.91	0.700909	2.73	0.287228	5.01	0.00258907
P3865	864.803	16.4663	6013_([M+NH4]+)_TG 51:1_C54H102O6	CHEBI:85733	Triradylglycerols (TG)	Glycerolipids	0.56	0.0933272	1.19	0.736408	3.73	0.00044808
P3847	862.787	17.0473	6023_([M+NH4]+)_TG 51:2_C54H100O6	CHEBI:85732	Triradylglycerols (TG)	Glycerolipids	0.44	0.290656	1.39	0.510554	3.91	0.00385011
P3827	860.771	16.5767	6024_([M+NH4]+)_TG 51:3_C54H98O6	CHEBI:85731	Triradylglycerols (TG)	Glycerolipids	0.43	0.24815	1.07	0.679139	3.42	0.0130931
P3804	858.755	16.0952	6025_([M+NH4]+)_TG 51:4_C54H96O6	CHEBI:85834	Triradylglycerols (TG)	Glycerolipids	0.4	0.222953	1.03	0.705939	3.12	0.0272893
P3972	878.818	17.8294	6032_([M+NH4]+)_TG 52:1_C55H104O6	NF	Triradylglycerols (TG)	Glycerolipids	0.76	0.491975	3.38	0.0788381	6.62	0.00121168
P3955	876.802	17.3948	6042_([M+NH4]+)_TG 52:2_C55H102O6	CHEBI:85736	Triradylglycerols (TG)	Glycerolipids	0.54	0.240597	1.7	0.232191	3.89	0.010855
P3944	874.787	16.9283	6043_([M+NH4]+)_TG 52:3_C55H100O6	CHEBI:84661	Triradylglycerols (TG)	Glycerolipids	0.49	0.289072	1.66	0.275779	5.27	0.00254251
P3931	872.771	16.4529	6044_([M+NH4]+)_TG 52:4_C55H98O6	CHEBI:84660	Triradylglycerols (TG)	Glycerolipids	0.42	0.229433	1.54	0.31323	5.13	0.00754056
P3913	870.755	15.9665	6045_([M+NH4]+)_TG 52:5_C55H96O6	CHEBI:85734	Triradylglycerols (TG)	Glycerolipids	0.35	0.151965	1.21	0.503385	4.06	0.0121196
P3899	868.739	15.6057	6046_([M+NH4]+)_TG 52:6_C55H94O6	CHEBI:85875	Triradylglycerols (TG)	Glycerolipids	0.32	0.117124	1.2	0.478641	4	0.0156796
P3882	866.724	15.2315	6047_([M+NH4]+)_TG 52:7_C55H92O6	NF	Triradylglycerols (TG)	Glycerolipids	0.39	0.13236	1.08	0.67165	3.46	0.0405435
P3861	864.708	14.8731	6048_([M+NH4]+)_TG 52:8_C55H90O6	NF	Triradylglycerols (TG)	Glycerolipids	0.49	0.180253	1.45	0.272972	4.22	0.0846303
P4107	892.833	17.1567	6051_([M+NH4]+)_TG 53:1_C56H106O6	NF	Triradylglycerols (TG)	Glycerolipids	0.65	0.27321	2.25	0.147698	6.13	0.000341537
P4108	892.834	18.1515	6051_([M+NH4]+)_TG 53:1_C56H106O6	NF	Triradylglycerols (TG)	Glycerolipids	0.68	0.422313	2.01	0.332257	3.42	0.0060609
P4085	890.818	16.6924	6061_([M+NH4]+)_TG 53:2_C56H104O6	CHEBI:85739	Triradylglycerols (TG)	Glycerolipids	0.45	0.104279	1.18	0.692087	4.43	0.00688628
P4061	888.802	16.2181	6062_([M+NH4]+)_TG 53:3_C56H102O6	CHEBI:85738	Triradylglycerols (TG)	Glycerolipids	0.34	0.0963873	0.77	0.889357	2.94	0.0236121
P4060	888.802	17.2753	6062_([M+NH4]+)_TG 53:3_C56H102O6	CHEBI:85738	Triradylglycerols (TG)	Glycerolipids	0.62	0.55802	1.55	0.330636	4.74	0.0047619
P4044	886.786	16.8181	6063_([M+NH4]+)_TG 53:4_C56H100O6	CHEBI:85737	Triradylglycerols (TG)	Glycerolipids	0.51	0.396001	1.48	0.373587	4.06	0.0120365
P4043	886.786	15.7464	6063_([M+NH4]+)_TG 53:4_C56H100O6	CHEBI:85737	Triradylglycerols (TG)	Glycerolipids	0.32	0.0979353	0.73	0.935289	2.91	0.0552021
P4028	884.77	16.356	6064_([M+NH4]+)_TG 53:5_C56H98O6	NF	Triradylglycerols (TG)	Glycerolipids	0.45	0.358104	1.4	0.372426	4.92	0.0499503
P4208	906.849	18.4849	6070_([M+NH4]+)_TG 54:1_C57H108O6	NF	Triradylglycerols (TG)	Glycerolipids	0.65	0.321327	1.86	0.346938	2.69	0.0217539
P4056	888.708	14.7917	6071_([M+NH4]+)_TG 54:10_C57H90O6	NF	Triradylglycerols (TG)	Glycerolipids	0.45	0.0750264	1.45	0.368186	3.77	0.174245
P4189	904.834	18.0493	6080_([M+NH4]+)_TG 54:2_C57H106O6	CHEBI:85743	Triradylglycerols (TG)	Glycerolipids	0.66	0.433794	1.96	0.196975	4.64	0.00197592
P4175	902.818	17.6137	6081_([M+NH4]+)_TG 54:3_C57H104O6	CHEBI:84659	Triradylglycerols (TG)	Glycerolipids	0.63	0.587561	1.87	0.178088	3.92	0.0174076
P4163	900.802	17.167	6082_([M+NH4]+)_TG 54:4_C57H102O6	CHEBI:85742	Triradylglycerols (TG)	Glycerolipids	0.67	0.58612	2.1	0.156735	4.42	0.00212255
P4151	898.786	16.6949	6083_([M+NH4]+)_TG 54:5_C57H100O6	CHEBI:85741	Triradylglycerols (TG)	Glycerolipids	0.56	0.430249	1.82	0.173275	4.7	0.00520454
P4143	896.77	16.2066	6084_([M+NH4]+)_TG 54:6_C57H98O6	CHEBI:85876	Triradylglycerols (TG)	Glycerolipids	0.45	0.328765	2.34	0.0290309	6.65	0.0244274
P4142	896.77	16.4794	6084_([M+NH4]+)_TG 54:6_C57H98O6	CHEBI:85876	Triradylglycerols (TG)	Glycerolipids	0.46	0.138762	2.41	0.0964652	6.29	0.0048571
P4128	894.755	15.9809	6085_([M+NH4]+)_TG 54:7_C57H96O6	CHEBI:85740	Triradylglycerols (TG)	Glycerolipids	0.43	0.168585	1.12	0.528763	4.31	0.0293211
P4102	892.739	15.5599	6086_([M+NH4]+)_TG 54:8_C57H94O6	CHEBI:85837	Triradylglycerols (TG)	Glycerolipids	0.41	0.106241	1.07	0.629931	2.74	0.0951144
P4329	920.865	18.8132	6089_([M+NH4]+)_TG 55:1_C58H110O6	NF	Triradylglycerols (TG)	Glycerolipids	0.64	0.389056	1.62	0.567723	2.31	0.0384664
P4309	918.849	17.3948	6099_([M+NH4]+)_TG 55:2_C58H108O6	NF	Triradylglycerols (TG)	Glycerolipids	0.57	0.237065	1.64	0.255239	4.57	0.00132803
P4310	918.849	18.3694	6099_([M+NH4]+)_TG 55:2_C58H108O6	NF	Triradylglycerols (TG)	Glycerolipids	0.55	0.377384	1.71	0.428202	3.98	0.00463052
P4286	916.833	16.9265	6100_([M+NH4]+)_TG 55:3_C58H106O6	NF	Triradylglycerols (TG)	Glycerolipids	0.57	0.251605	1.53	0.288748	4.1	0.00370163
P4287	916.834	17.9399	6100_([M+NH4]+)_TG 55:3_C58H106O6	NF	Triradylglycerols (TG)	Glycerolipids	0.59	0.497094	1.5	0.379572	3.8	0.0047064
P4267	914.817	16.4522	6101_([M+NH4]+)_TG 55:4_C58H104O6	CHEBI:85746	Triradylglycerols (TG)	Glycerolipids	0.53	0.237762	1.5	0.32798	3.93	0.00832863
P4268	914.818	17.4939	6101_([M+NH4]+)_TG 55:4_C58H104O6	CHEBI:85746	Triradylglycerols (TG)	Glycerolipids	0.6	0.532842	1.55	0.329652	4.03	0.00695175
P4252	912.802	15.9898	6102_([M+NH4]+)_TG 55:5_C58H102O6	CHEBI:85745	Triradylglycerols (TG)	Glycerolipids	0.41	0.167218	1.59	0.324932	4.28	0.0110918
P4253	912.802	17.0731	6102_([M+NH4]+)_TG 55:5_C58H102O6	CHEBI:85745	Triradylglycerols (TG)	Glycerolipids	0.61	0.638023	1.41	0.375089	4.7	0.0182501
P4237	910.786	16.804	6103_([M+NH4]+)_TG 55:6_C58H100O6	CHEBI:85744	Triradylglycerols (TG)	Glycerolipids	0.71	0.738082	2.06	0.132801	5.76	0.0213841
P4224	908.771	16.4087	6104_([M+NH4]+)_TG 55:7_C58H98O6	CHEBI:85840	Triradylglycerols (TG)	Glycerolipids	0.59	0.489365	1.35	0.33131	3.75	0.0511174
P4203	906.754	15.9584	6105_([M+NH4]+)_TG 55:8_C58H96O6	CHEBI:85839	Triradylglycerols (TG)	Glycerolipids	0.48	0.256394	1.02	0.569826	2.52	0.12578
P4425	934.88	19.1458	6108_([M+NH4]+)_TG 56:1_C59H112O6	NF	Triradylglycerols (TG)	Glycerolipids	0.68	0.430653	1.57	0.518046	2.36	0.0435895
P4280	916.739	15.3972	6109_([M+NH4]+)_TG 56:10_C59H94O6	CHEBI:85877	Triradylglycerols (TG)	Glycerolipids	0.52	0.154435	1.69	0.155407	3.47	0.0982299
P4263	914.724	14.9621	6110_([M+NH4]+)_TG 56:11_C59H92O6	NF	Triradylglycerols (TG)	Glycerolipids	0.42	0.074311	1.26	0.363378	1.51	0.390973
P4408	932.865	17.3962	6118_([M+NH4]+)_TG 56:2_C59H110O6	NF	Triradylglycerols (TG)	Glycerolipids	0.53	0.263389	1.8	0.232726	5.61	0.000878555
P4407	932.865	18.6964	6118_([M+NH4]+)_TG 56:2_C59H110O6	NF	Triradylglycerols (TG)	Glycerolipids	0.55	0.3787	1.39	0.589892	3.13	0.0380073
P4391	930.848	16.9282	6119_([M+NH4]+)_TG 56:3_C59H108O6	CHEBI:85843	Triradylglycerols (TG)	Glycerolipids	0.44	0.180795	1.65	0.273541	4.99	0.00319309
P4392	930.849	18.2629	6119_([M+NH4]+)_TG 56:3_C59H108O6	CHEBI:85843	Triradylglycerols (TG)	Glycerolipids	0.56	0.300291	1.35	0.382404	2.31	0.0284258
P4375	928.833	16.4528	6120_([M+NH4]+)_TG 56:4_C59H106O6	CHEBI:85842	Triradylglycerols (TG)	Glycerolipids	0.45	0.238553	1.58	0.30712	5.33	0.00497776
P4374	928.833	17.8144	6120_([M+NH4]+)_TG 56:4_C59H106O6	CHEBI:85842	Triradylglycerols (TG)	Glycerolipids	0.56	0.427984	1.6	0.267107	3.99	0.0258649
P4364	926.817	17.3878	6121_([M+NH4]+)_TG 56:5_C59H104O6	CHEBI:85751	Triradylglycerols (TG)	Glycerolipids	0.88	0.85445	3.72	0.0117082	7.8	0.00227868
P4354	924.802	17.1175	6122_([M+NH4]+)_TG 56:6_C59H102O6	CHEBI:85750	Triradylglycerols (TG)	Glycerolipids	0.74	0.767715	2.83	0.047364	5.92	0.00655196
P4344	922.786	16.7594	6123_([M+NH4]+)_TG 56:7_C59H100O6	CHEBI:85749	Triradylglycerols (TG)	Glycerolipids	0.77	0.748404	2.52	0.0551555	6.04	0.0381916
P4326	920.771	16.3153	6124_([M+NH4]+)_TG 56:8_C59H98O6	CHEBI:85748	Triradylglycerols (TG)	Glycerolipids	0.63	0.406508	1.75	0.166761	4.45	0.0598794
P4304	918.754	15.8511	6125_([M+NH4]+)_TG 56:9_C59H96O6	CHEBI:85747	Triradylglycerols (TG)	Glycerolipids	0.53	0.242565	1.5	0.232503	3.47	0.108708
P4525	948.896	19.5154	6127_([M+NH4]+)_TG 57:1_C60H114O6	NF	Triradylglycerols (TG)	Glycerolipids	0.66	0.382273	1.49	0.528725	2.23	0.0596295
P4386	930.755	15.8265	6128_([M+NH4]+)_TG 57:10_C60H96O6	NF	Triradylglycerols (TG)	Glycerolipids	0.68	0.682427	1.81	0.157515	6.18	0.0546516
P4506	946.881	19.0298	6137_([M+NH4]+)_TG 57:2_C60H112O6	NF	Triradylglycerols (TG)	Glycerolipids	0.51	0.371195	1.74	0.493475	3.69	0.00641226
P4505	946.881	18.0494	6137_([M+NH4]+)_TG 57:2_C60H112O6	NF	Triradylglycerols (TG)	Glycerolipids	0.65	0.427845	1.99	0.194472	4.83	0.00139354
P4490	944.865	18.5818	6138_([M+NH4]+)_TG 57:3_C60H110O6	NF	Triradylglycerols (TG)	Glycerolipids	0.44	0.350791	1.4	0.605353	3.69	0.0150603
P4489	944.865	17.6136	6138_([M+NH4]+)_TG 57:3_C60H110O6	NF	Triradylglycerols (TG)	Glycerolipids	0.67	0.495308	1.84	0.177879	4.93	0.0080788
P4472	942.85	18.1472	6139_([M+NH4]+)_TG 57:4_C60H108O6	NF	Triradylglycerols (TG)	Glycerolipids	0.48	0.433623	1.79	0.390198	6.35	0.011331
P4471	942.849	17.1664	6139_([M+NH4]+)_TG 57:4_C60H108O6	NF	Triradylglycerols (TG)	Glycerolipids	0.75	0.6719	1.95	0.172277	4.08	0.00133326
P4458	940.833	16.693	6140_([M+NH4]+)_TG 57:5_C60H106O6	NF	Triradylglycerols (TG)	Glycerolipids	0.61	0.435733	1.73	0.184735	4.19	0.00433412
P4447	938.817	16.2069	6141_([M+NH4]+)_TG 57:6_C60H104O6	NF	Triradylglycerols (TG)	Glycerolipids	0.7	0.34492	1.88	0.336477	7.16	0.005755
P4446	938.817	17.4837	6141_([M+NH4]+)_TG 57:6_C60H104O6	NF	Triradylglycerols (TG)	Glycerolipids	0.85	0.982125	2.09	0.129926	6.01	0.00487913
P4435	936.802	16.0019	6142_([M+NH4]+)_TG 57:7_C60H102O6	NF	Triradylglycerols (TG)	Glycerolipids	0.69	0.435266	1.87	0.159556	3.83	0.02168
P4434	936.802	17.0776	6142_([M+NH4]+)_TG 57:7_C60H102O6	NF	Triradylglycerols (TG)	Glycerolipids	0.8	0.94058	1.94	0.147299	4.82	0.0314811
P4418	934.786	16.7014	6143_([M+NH4]+)_TG 57:8_C60H100O6	NF	Triradylglycerols (TG)	Glycerolipids	0.62	0.542967	1.52	0.265087	3.32	0.0755677
P4402	932.77	16.2452	6144_([M+NH4]+)_TG 57:9_C60H98O6	NF	Triradylglycerols (TG)	Glycerolipids	0.55	0.426212	1.12	0.445639	2.7	0.133984
P4594	962.912	19.8213	6146_([M+NH4]+)_TG 58:1_C61H116O6	NF	Triradylglycerols (TG)	Glycerolipids	0.69	0.405965	1.65	0.358859	2.32	0.032692
P4485	944.771	16.1721	6147_([M+NH4]+)_TG 58:10_C61H98O6	CHEBI:85752	Triradylglycerols (TG)	Glycerolipids	0.79	0.786583	2.08	0.111943	4.5	0.0564559
P4468	942.755	15.7354	6148_([M+NH4]+)_TG 58:11_C61H96O6	NF	Triradylglycerols (TG)	Glycerolipids	0.6	0.286641	1.51	0.237955	2.79	0.14735
P4454	940.74	15.2563	6149_([M+NH4]+)_TG 58:12_C61H94O6	NF	Triradylglycerols (TG)	Glycerolipids	0.51	0.0531568	1.18	0.473224	1.71	0.38606
P4584	960.896	19.3621	6156_([M+NH4]+)_TG 58:2_C61H114O6	NF	Triradylglycerols (TG)	Glycerolipids	0.53	0.360676	1.58	0.532225	3.26	0.0349984
P4573	958.881	17.6137	6157_([M+NH4]+)_TG 58:3_C61H112O6	NF	Triradylglycerols (TG)	Glycerolipids	0.58	0.343498	1.79	0.248429	4.99	0.00156764
P4572	958.881	18.906	6157_([M+NH4]+)_TG 58:3_C61H112O6	NF	Triradylglycerols (TG)	Glycerolipids	0.5	0.439547	1.22	0.734149	3.03	0.0410915
P4562	956.865	17.1642	6158_([M+NH4]+)_TG 58:4_C61H110O6	NF	Triradylglycerols (TG)	Glycerolipids	0.53	0.353042	1.95	0.198315	5.12	0.000692393
P4561	956.865	18.4597	6158_([M+NH4]+)_TG 58:4_C61H110O6	NF	Triradylglycerols (TG)	Glycerolipids	0.49	0.480821	1.13	0.686391	3.14	0.0961892
P4552	954.85	18.0338	6159_([M+NH4]+)_TG 58:5_C61H108O6	NF	Triradylglycerols (TG)	Glycerolipids	1.05	0.670049	1.98	0.210791	2.89	0.0112317
P4542	952.834	16.2067	6160_([M+NH4]+)_TG 58:6_C61H106O6	CHEBI:85757	Triradylglycerols (TG)	Glycerolipids	0.51	0.522435	1.96	0.139331	10.34	0.068191
P4535	950.817	17.2947	6161_([M+NH4]+)_TG 58:7_C61H104O6	CHEBI:85755	Triradylglycerols (TG)	Glycerolipids	0.79	0.679169	1.45	0.263868	2.87	0.0490095
P4521	948.802	17.0516	6162_([M+NH4]+)_TG 58:8_C61H102O6	CHEBI:85754	Triradylglycerols (TG)	Glycerolipids	0.68	0.551805	2.45	0.0611008	4.52	0.0106484
P4502	946.787	16.5833	6163_([M+NH4]+)_TG 58:9_C61H100O6	CHEBI:85753	Triradylglycerols (TG)	Glycerolipids	0.76	0.751044	1.8	0.161389	3.94	0.0576009
P4662	974.912	19.6794	6175_([M+NH4]+)_TG 59:2_C62H116O6	NF	Triradylglycerols (TG)	Glycerolipids	0.45	0.331373	1.95	0.458561	6.49	0.0141603
P4650	972.897	18.2623	6176_([M+NH4]+)_TG 59:3_C62H114O6	NF	Triradylglycerols (TG)	Glycerolipids	0.54	0.451212	1.23	0.588499	2.93	0.0166871
P4636	970.881	17.8142	6177_([M+NH4]+)_TG 59:4_C62H112O6	NF	Triradylglycerols (TG)	Glycerolipids	0.6	0.569782	1.7	0.25706	5.02	0.0170748
P4621	968.865	17.3888	6178_([M+NH4]+)_TG 59:5_C62H110O6	NF	Triradylglycerols (TG)	Glycerolipids	0.99	0.719737	3.23	0.0709662	6.08	0.0057457
P4610	966.85	17.1311	6179_([M+NH4]+)_TG 59:6_C62H108O6	NF	Triradylglycerols (TG)	Glycerolipids	0.84	0.929128	2.96	0.034185	6.75	0.0116767
P4601	964.833	16.7614	6180_([M+NH4]+)_TG 59:7_C62H106O6	NF	Triradylglycerols (TG)	Glycerolipids	0.94	0.972613	2.34	0.0626178	4.93	0.0220179
P4592	962.818	17.3941	6181_([M+NH4]+)_TG 59:8_C62H104O6	NF	Triradylglycerols (TG)	Glycerolipids	0.72	0.84137	1.62	0.267806	4.8	0.0232266
P4591	962.818	16.3194	6181_([M+NH4]+)_TG 59:8_C62H104O6	NF	Triradylglycerols (TG)	Glycerolipids	0.7	0.496921	1.79	0.150707	4.12	0.0564442
P4581	960.802	15.8286	6182_([M+NH4]+)_TG 59:9_C62H102O6	NF	Triradylglycerols (TG)	Glycerolipids	0.64	0.291157	2.88	0.0518998	4.07	0.0760252
P4647	972.802	16.8423	6185_([M+NH4]+)_TG 60:10_C63H102O6	CHEBI:85758	Triradylglycerols (TG)	Glycerolipids	0.76	0.857097	1.08	0.378093	1.85	0.286954
P4633	970.787	16.5952	6186_([M+NH4]+)_TG 60:11_C63H100O6	NF	Triradylglycerols (TG)	Glycerolipids	0.83	0.886286	1.82	0.147761	3.73	0.0821459
P4618	968.771	16.1122	6187_([M+NH4]+)_TG 60:12_C63H98O6	NF	Triradylglycerols (TG)	Glycerolipids	0.74	0.613137	1.34	0.325929	2.72	0.196535
P4608	966.755	15.6257	6188_([M+NH4]+)_TG 60:13_C63H96O6	NF	Triradylglycerols (TG)	Glycerolipids	0.47	0.0815173	1.04	0.606276	1.52	0.653671
P4706	988.928	20.0084	6194_([M+NH4]+)_TG 60:2_C63H118O6	NF	Triradylglycerols (TG)	Glycerolipids	0.5	0.324661	2.02	0.329959	4.53	0.00804283
P4700	986.912	19.5626	6195_([M+NH4]+)_TG 60:3_C63H116O6	NF	Triradylglycerols (TG)	Glycerolipids	0.46	0.370821	1.49	0.563127	4.12	0.0178993
P4694	984.896	19.1136	6196_([M+NH4]+)_TG 60:4_C63H114O6	NF	Triradylglycerols (TG)	Glycerolipids	0.46	0.446437	1.41	0.464135	4.09	0.00569836
P4690	982.881	18.6837	6197_([M+NH4]+)_TG 60:5_C63H112O6	NF	Triradylglycerols (TG)	Glycerolipids	0.45	0.467556	1.55	0.343541	4.58	0.00520978
P4683	980.864	17.1523	6198_([M+NH4]+)_TG 60:6_C63H110O6	NF	Triradylglycerols (TG)	Glycerolipids	0.78	0.975587	4.16	0.0626937	13.53	0.000727022
P4684	980.865	18.3175	6198_([M+NH4]+)_TG 60:6_C63H110O6	NF	Triradylglycerols (TG)	Glycerolipids	1.13	0.483393	1.71	0.21301	3.79	0.0893088
P4677	978.85	17.934	6199_([M+NH4]+)_TG 60:7_C63H108O6	NF	Triradylglycerols (TG)	Glycerolipids	1.01	0.731322	1.73	0.187067	3.32	0.0293548
P4676	978.85	16.7615	6199_([M+NH4]+)_TG 60:7_C63H108O6	NF	Triradylglycerols (TG)	Glycerolipids	0.72	0.893652	2.83	0.0587319	8.07	0.0220339
P4670	976.833	16.3287	6200_([M+NH4]+)_TG 60:8_C63H106O6	NF	Triradylglycerols (TG)	Glycerolipids	0.61	0.431952	1.99	0.151448	5.23	0.0299636
P4659	974.818	17.1956	6201_([M+NH4]+)_TG 60:9_C63H104O6	NF	Triradylglycerols (TG)	Glycerolipids	0.71	0.655923	1.86	0.130142	3.71	0.0574203
P4698	986.818	16.1753	6204_([M+NH4]+)_TG 61:10_C64H104O6	NF	Triradylglycerols (TG)	Glycerolipids	0.9	0.986933	2.25	0.0904658	4.21	0.0598337
P4692	984.802	15.7545	6205_([M+NH4]+)_TG 61:11_C64H102O6	NF	Triradylglycerols (TG)	Glycerolipids	0.7	0.373687	2.45	0.0975112	3.36	0.132765
P4719	992.864	17.2997	6218_([M+NH4]+)_TG 61:7_C64H110O6	NF	Triradylglycerols (TG)	Glycerolipids	0.78	0.905452	1.69	0.198255	4.39	0.0241332
P4711	990.849	17.0565	6219_([M+NH4]+)_TG 61:8_C64H108O6	NF	Triradylglycerols (TG)	Glycerolipids	0.9	0.921979	3.21	0.029295	4.24	0.0391497
P4704	988.833	16.5876	6220_([M+NH4]+)_TG 61:9_C64H106O6	NF	Triradylglycerols (TG)	Glycerolipids	0.83	0.804964	2.12	0.0828543	3.58	0.0466762
P4741	1000.83	17.4798	6223_([M+NH4]+)_TG 62:10_C65H106O6	NF	Triradylglycerols (TG)	Glycerolipids	0.93	0.729284	2.32	0.0792698	5.04	0.0280688
P4734	998.818	17.1276	6224_([M+NH4]+)_TG 62:11_C65H104O6	NF	Triradylglycerols (TG)	Glycerolipids	0.94	0.770584	1.91	0.120912	3.52	0.0706617
P4730	996.802	16.6402	6225_([M+NH4]+)_TG 62:12_C65H102O6	NF	Triradylglycerols (TG)	Glycerolipids	0.98	0.742901	1.49	0.220698	2.57	0.186814
P4725	994.786	16.4655	6226_([M+NH4]+)_TG 62:13_C65H100O6	NF	Triradylglycerols (TG)	Glycerolipids	0.69	0.545388	1.37	0.275477	2.27	0.302678
P4716	992.77	15.9665	6227_([M+NH4]+)_TG 62:14_C65H98O6	NF	Triradylglycerols (TG)	Glycerolipids	0.56	0.250119	1.07	0.498024	1.8	0.488343
P4752	1004.87	18.3076	6238_([M+NH4]+)_TG 62:8_C65H110O6	NF	Triradylglycerols (TG)	Glycerolipids	0.77	0.963016	1.45	0.301281	4.03	0.0241169
P4749	1002.85	17.8348	6239_([M+NH4]+)_TG 62:9_C65H108O6	NF	Triradylglycerols (TG)	Glycerolipids	1	0.621044	2.6	0.0796838	4.3	0.00328321
P4762	1014.85	16.8278	6242_([M+NH4]+)_TG 63:10_C66H108O6	NF	Triradylglycerols (TG)	Glycerolipids	1.52	0.187882	2.16	0.140143	5.68	0.0723911
P4757	1012.83	16.5982	6243_([M+NH4]+)_TG 63:11_C66H106O6	NF	Triradylglycerols (TG)	Glycerolipids	1.07	0.558249	2.45	0.116165	3.75	0.07453
P4755	1010.82	16.11	6244_([M+NH4]+)_TG 63:12_C66H104O6	NF	Triradylglycerols (TG)	Glycerolipids	0.77	0.68159	1.6	0.225509	2.83	0.227137
P4781	1024.83	17.354	6263_([M+NH4]+)_TG 64:12_C67H106O6	NF	Triradylglycerols (TG)	Glycerolipids	0.95	0.673778	1.88	0.144334	4.06	0.123311
P4779	1022.82	16.9644	6264_([M+NH4]+)_TG 64:13_C67H104O6	NF	Triradylglycerols (TG)	Glycerolipids	0.68	0.782792	1.26	0.415276	2.11	0.354983
P4776	1020.8	16.4913	6265_([M+NH4]+)_TG 64:14_C67H102O6	NF	Triradylglycerols (TG)	Glycerolipids	0.6	0.452353	1.02	0.550338	2.05	0.483968
P4789	1056.89	15.9044	6299_([M+NH4]+)_TG 66:10_C69H114O6	NF	Triradylglycerols (TG)	Glycerolipids	0.61	0.16785	0.73	0.487942	0.96	0.756558
P4791	1080.9	15.6685	6339_([M+NH4]+)_TG 68:12_C71H114O6	NF	Triradylglycerols (TG)	Glycerolipids	0.63	0.168793	0.73	0.56188	1.01	0.934208
P4793	1104.9	15.4922	6379_([M+NH4]+)_TG 70:14_C73H114O6	NF	Triradylglycerols (TG)	Glycerolipids	0.38	0.0894585	0.33	0.198426	0.88	0.612691
P2621	706.538	8.75137	3412_([M+H]+)_PC 30a:0_C38H76NO8P	CHEBI:65303	Glycerophosphocholines (PC)	Glycerophospholipids	0.65	0.224089	0.7	0.677524	1.57	0.120966
P2730	720.554	9.05851	3418_([M+H]+)_PC 31a:0_C39H78NO8P	NF	Glycerophosphocholines (PC)	Glycerophospholipids	0.67	0.463455	0.48	0.401528	1.48	0.165882
P2686	716.523	9.09329	3420_([M+H]+)_PC 31a:2_C39H74NO8P	NF	Glycerophosphocholines (PC)	Glycerophospholipids	0.41	0.162311	0.67	0.870971	2.74	0.118865
P2843	734.57	9.36765	3425_([M+H]+)_PC 32a:0_C40H80NO8P	CHEBI:66850	Glycerophosphocholines (PC)	Glycerophospholipids	0.61	0.18657	0.63	0.6241	1.58	0.0610699
P2820	732.554	8.98588	3426_([M+H]+)_PC 32a:1_C40H78NO8P	CHEBI:66849	Glycerophosphocholines (PC)	Glycerophospholipids	0.56	0.179704	0.53	0.223651	1.1	0.636086
P2800	730.539	8.55284	3427_([M+H]+)_PC 32a:2_C40H76NO8P	CHEBI:66848	Glycerophosphocholines (PC)	Glycerophospholipids	0.52	0.182033	0.46	0.205485	1.04	0.945827
P2946	748.585	9.72715	3432_([M+H]+)_PC 33a:0_C41H82NO8P	NF	Glycerophosphocholines (PC)	Glycerophospholipids	0.62	0.272424	0.57	0.641603	1.48	0.236747
P2914	744.555	9.77813	3434_([M+H]+)_PC 33a:2_C41H78NO8P	CHEBI:85853	Glycerophosphocholines (PC)	Glycerophospholipids	0.51	0.239271	0.76	0.94931	2.37	0.0998917
P2913	744.554	8.87869	3434_([M+H]+)_PC 33a:2_C41H78NO8P	CHEBI:85853	Glycerophosphocholines (PC)	Glycerophospholipids	0.58	0.308303	0.51	0.528811	1.19	0.733498
P2898	742.538	9.31904	3435_([M+H]+)_PC 33a:3_C41H76NO8P	NF	Glycerophosphocholines (PC)	Glycerophospholipids	0.37	0.0984573	0.54	0.55089	1.2	0.65534
P2899	742.538	8.60332	3435_([M+H]+)_PC 33a:3_C41H76NO8P	NF	Glycerophosphocholines (PC)	Glycerophospholipids	0.35	0.145368	0.36	0.52638	1.53	0.29765
P2884	740.523	9.16875	3436_([M+H]+)_PC 33a:4_C41H74NO8P	NF	Glycerophosphocholines (PC)	Glycerophospholipids	0.43	0.0990271	0.68	0.805202	1.71	0.149987
P3050	762.602	10.0663	3441_([M+H]+)_PC 34a:0_C42H84NO8P	CHEBI:66855	Glycerophosphocholines (PC)	Glycerophospholipids	0.8	0.58501	0.7	0.523362	1.49	0.111591
P3023	760.585	9.62246	3442_([M+H]+)_PC 34a:1_C42H82NO8P	CHEBI:64517	Glycerophosphocholines (PC)	Glycerophospholipids	0.6	0.189403	0.87	0.887329	1.87	0.053871
P3005	758.57	9.1383	3443_([M+H]+)_PC 34a:2_C42H80NO8P	CHEBI:64516	Glycerophosphocholines (PC)	Glycerophospholipids	0.65	0.250445	0.74	0.733372	1.49	0.252689
P2988	756.554	8.82187	3444_([M+H]+)_PC 34a:3_C42H78NO8P	CHEBI:64424	Glycerophosphocholines (PC)	Glycerophospholipids	0.49	0.152124	0.45	0.224	0.92	0.620276
P2975	754.539	8.55887	3445_([M+H]+)_PC 34a:4_C42H76NO8P	CHEBI:64423	Glycerophosphocholines (PC)	Glycerophospholipids	0.47	0.133943	0.35	0.136088	0.76	0.227475
P3146	776.617	10.4634	3449_([M+H]+)_PC 35a:0_C43H86NO8P	NF	Glycerophosphocholines (PC)	Glycerophospholipids	0.49	0.0992278	0.53	0.434973	1.34	0.35445
P3131	774.601	9.92987	3450_([M+H]+)_PC 35a:1_C43H84NO8P	NF	Glycerophosphocholines (PC)	Glycerophospholipids	1.13	0.556608	1.01	0.693214	2.05	0.107862
P3117	772.585	9.52685	3451_([M+H]+)_PC 35a:2_C43H82NO8P	CHEBI:85766	Glycerophosphocholines (PC)	Glycerophospholipids	0.65	0.431099	0.61	0.608245	1.36	0.498993
P3100	770.57	9.07944	3452_([M+H]+)_PC 35a:3_C43H80NO8P	NF	Glycerophosphocholines (PC)	Glycerophospholipids	0.58	0.368741	0.42	0.252	0.77	0.380689
P3087	768.554	9.85539	3453_([M+H]+)_PC 35a:4_C43H78NO8P	NF	Glycerophosphocholines (PC)	Glycerophospholipids	0.51	0.118976	0.99	0.56857	2.55	0.0522113
P3063	764.521	9.10775	3455_([M+H]+)_PC 35a:6_C43H74NO8P	NF	Glycerophosphocholines (PC)	Glycerophospholipids	0.44	0.132267	0.73	0.956168	2.67	0.109924
P3253	790.633	10.8255	3459_([M+H]+)_PC 36a:0_C44H88NO8P	CHEBI:66858	Glycerophosphocholines (PC)	Glycerophospholipids	0.79	0.444536	0.95	0.798317	1.44	0.0962603
P3236	788.617	10.3503	3460_([M+H]+)_PC 36a:1_C44H86NO8P	CHEBI:66857	Glycerophosphocholines (PC)	Glycerophospholipids	0.74	0.430299	0.88	0.909703	1.58	0.126579
P3225	786.601	9.86202	3461_([M+H]+)_PC 36a:2_C44H84NO8P	CHEBI:64433	Glycerophosphocholines (PC)	Glycerophospholipids	0.6	0.190828	0.69	0.610708	1.16	0.696918
P3204	784.585	9.40973	3462_([M+H]+)_PC 36a:3_C44H82NO8P	CHEBI:64523	Glycerophosphocholines (PC)	Glycerophospholipids	0.57	0.174476	0.47	0.154966	0.84	0.451629
P3181	782.569	9.20299	3463_([M+H]+)_PC 36a:4_C44H80NO8P	CHEBI:64520	Glycerophosphocholines (PC)	Glycerophospholipids	0.64	0.230127	0.72	0.780267	1.44	0.312325
P3165	780.554	8.83024	3464_([M+H]+)_PC 36a:5_C44H78NO8P	CHEBI:64504	Glycerophosphocholines (PC)	Glycerophospholipids	0.45	0.0801438	0.39	0.119791	0.76	0.265437
P3164	780.554	8.83237	3464_([M+H]+)_PC 36a:5_C44H78NO8P	CHEBI:64504	Glycerophosphocholines (PC)	Glycerophospholipids	0.47	0.112294	0.46	0.141998	0.67	0.0908689
P3157	778.538	8.54548	3465_([M+H]+)_PC 36a:6_C44H76NO8P	CHEBI:66856	Glycerophosphocholines (PC)	Glycerophospholipids	0.44	0.0721124	0.31	0.0551729	0.65	0.145729
P3346	800.617	10.2812	3471_([M+H]+)_PC 37a:2_C45H86NO8P	NF	Glycerophosphocholines (PC)	Glycerophospholipids	0.62	0.33636	0.4	0.173341	0.86	0.655452
P3329	798.601	9.77409	3472_([M+H]+)_PC 37a:3_C45H84NO8P	NF	Glycerophosphocholines (PC)	Glycerophospholipids	0.57	0.253754	0.34	0.108038	0.34	0.183181
P3309	796.585	9.57797	3473_([M+H]+)_PC 37a:4_C45H82NO8P	CHEBI:72427	Glycerophosphocholines (PC)	Glycerophospholipids	0.66	0.409311	0.67	0.892287	1.58	0.349187
P3293	794.571	9.0906	3474_([M+H]+)_PC 37a:5_C45H80NO8P	CHEBI:85767	Glycerophosphocholines (PC)	Glycerophospholipids	0.6	0.403142	0.43	0.252121	0.79	0.44333
P3271	792.554	9.79183	3475_([M+H]+)_PC 37a:6_C45H78NO8P	NF	Glycerophosphocholines (PC)	Glycerophospholipids	0.56	0.188141	1.37	0.283888	4.12	0.0427584
P3270	792.554	8.86299	3475_([M+H]+)_PC 37a:6_C45H78NO8P	NF	Glycerophosphocholines (PC)	Glycerophospholipids	0.49	0.186838	0.38	0.287117	0.83	0.533664
P3248	790.539	9.3151	3476_([M+H]+)_PC 37a:7_C45H76NO8P	NF	Glycerophosphocholines (PC)	Glycerophospholipids	0.47	0.120367	0.75	0.992772	1.97	0.190669
P3474	816.649	11.0677	3480_([M+H]+)_PC 38a:1_C46H90NO8P	CHEBI:66860	Glycerophosphocholines (PC)	Glycerophospholipids	0.58	0.135809	0.31	0.0263302	0.5	0.04083
P3456	814.633	10.6418	3481_([M+H]+)_PC 38a:2_C46H88NO8P	CHEBI:66859	Glycerophosphocholines (PC)	Glycerophospholipids	0.47	0.0938387	0.26	0.0234763	0.41	0.0209004
P3424	810.601	9.91566	3483_([M+H]+)_PC 38a:4_C46H84NO8P	CHEBI:64526	Glycerophosphocholines (PC)	Glycerophospholipids	0.61	0.163328	0.78	0.938276	1.33	0.477526
P3410	808.585	9.4339	3484_([M+H]+)_PC 38a:5_C46H82NO8P	CHEBI:64525	Glycerophosphocholines (PC)	Glycerophospholipids	0.67	0.362935	0.52	0.482673	1.01	0.928151
P3396	806.569	9.1304	3485_([M+H]+)_PC 38a:6_C46H80NO8P	CHEBI:64519	Glycerophosphocholines (PC)	Glycerophospholipids	0.56	0.125955	0.53	0.351294	1.07	0.971071
P3375	804.554	8.77247	3486_([M+H]+)_PC 38a:7_C46H78NO8P	CHEBI:64498	Glycerophosphocholines (PC)	Glycerophospholipids	0.43	0.102304	0.27	0.0481771	0.47	0.0657465
P3568	828.648	10.9751	3493_([M+H]+)_PC 39a:2_C47H90NO8P	NF	Glycerophosphocholines (PC)	Glycerophospholipids	0.46	0.255946	0.21	0.00647893	0.63	0.193205
P3528	824.617	10.3285	3495_([M+H]+)_PC 39a:4_C47H86NO8P	NF	Glycerophosphocholines (PC)	Glycerophospholipids	0.57	0.239374	0.38	0.233323	0.82	0.602723
P3515	822.601	9.78712	3496_([M+H]+)_PC 39a:5_C47H84NO8P	NF	Glycerophosphocholines (PC)	Glycerophospholipids	1.13	0.768553	0.65	0.418835	0.92	0.888134
P3500	820.585	9.50664	3497_([M+H]+)_PC 39a:6_C47H82NO8P	NF	Glycerophosphocholines (PC)	Glycerophospholipids	0.58	0.29696	0.51	0.487121	1.21	0.815925
P3486	818.569	9.06177	3498_([M+H]+)_PC 39a:7_C47H80NO8P	NF	Glycerophosphocholines (PC)	Glycerophospholipids	0.45	0.216166	0.23	0.0612707	0.43	0.0889556
P3693	844.68	11.7951	3502_([M+H]+)_PC 40a:1_C48H94NO8P	CHEBI:66865	Glycerophosphocholines (PC)	Glycerophospholipids	0.54	0.229969	0.21	0.0996214	0.53	0.0993023
P3681	842.664	11.4023	3504_([M+H]+)_PC 40a:2_C48H92NO8P	CHEBI:66864	Glycerophosphocholines (PC)	Glycerophospholipids	0.48	0.118449	0.29	0.0500252	0.53	0.070956
P3651	838.633	10.6533	3506_([M+H]+)_PC 40a:4_C48H88NO8P	CHEBI:66862	Glycerophosphocholines (PC)	Glycerophospholipids	0.49	0.0958456	0.4	0.134697	0.76	0.361701
P3619	834.601	9.85275	3508_([M+H]+)_PC 40a:6_C48H84NO8P	CHEBI:64431	Glycerophosphocholines (PC)	Glycerophospholipids	0.56	0.120215	0.66	0.628481	1.16	0.799924
P3601	832.585	9.36736	3509_([M+H]+)_PC 40a:7_C48H82NO8P	CHEBI:64521	Glycerophosphocholines (PC)	Glycerophospholipids	0.54	0.199035	0.36	0.0937969	0.64	0.183865
P3583	830.57	8.97411	3510_([M+H]+)_PC 40a:8_C48H80NO8P	CHEBI:85851	Glycerophosphocholines (PC)	Glycerophospholipids	0.42	0.101178	0.29	0.0929857	0.51	0.127985
P3565	828.555	8.61468	3511_([M+H]+)_PC 40a:9_C48H78NO8P	CHEBI:85850	Glycerophosphocholines (PC)	Glycerophospholipids	0.49	0.118523	0.29	0.0432964	0.46	0.0294715
P3748	852.648	11.0102	3518_([M+H]+)_PC 41a:4_C49H90NO8P	NF	Glycerophosphocholines (PC)	Glycerophospholipids	0.37	0.212205	0.19	0.0681126	0.48	0.247808
P3713	848.617	10.2571	3520_([M+H]+)_PC 41a:6_C49H86NO8P	NF	Glycerophosphocholines (PC)	Glycerophospholipids	0.51	0.192308	0.29	0.113973	0.64	0.240624
P3764	854.569	8.93682	3526_([M+H]+)_PC 42a:10_C50H80NO8P	CHEBI:85769	Glycerophosphocholines (PC)	Glycerophospholipids	0.36	0.127303	0.21	0.0491715	0.39	0.0743827
P3747	852.56	8.00717	3527_([M+H]+)_PC 42a:11_C50H78NO8P	NF	Glycerophosphocholines (PC)	Glycerophospholipids	0.66	0.310898	0.59	0.426871	1.38	0.265817
P3910	870.695	12.1778	3528_([M+H]+)_PC 42a:2_C50H96NO8P	CHEBI:66969	Glycerophosphocholines (PC)	Glycerophospholipids	0.54	0.22936	0.46	0.241	0.97	0.895254
P3897	868.679	11.5559	3529_([M+H]+)_PC 42a:3_C50H94NO8P	CHEBI:66968	Glycerophosphocholines (PC)	Glycerophospholipids	0.34	0.116492	0.18	0.0189121	0.46	0.145838
P3860	864.649	10.8059	3531_([M+H]+)_PC 42a:5_C50H90NO8P	CHEBI:66966	Glycerophosphocholines (PC)	Glycerophospholipids	0.52	0.170491	0.3	0.0620795	0.54	0.0854019
P3842	862.633	10.6328	3532_([M+H]+)_PC 42a:6_C50H88NO8P	CHEBI:66965	Glycerophosphocholines (PC)	Glycerophospholipids	0.56	0.190964	0.23	0.0671212	0.31	0.0596549
P3824	860.617	10.0459	3533_([M+H]+)_PC 42a:7_C50H86NO8P	CHEBI:131440	Glycerophosphocholines (PC)	Glycerophospholipids	0.49	0.155798	0.2	0.0177038	0.3	0.0293709
P3787	856.587	9.14249	3535_([M+H]+)_PC 42a:9_C50H82NO8P	NF	Glycerophosphocholines (PC)	Glycerophospholipids	0.56	0.253593	0.27	0.0187643	0.3	0.0153075
P3989	880.592	8.62196	3546_([M+H]+)_PC 44a:11_C52H82NO8P	NF	Glycerophosphocholines (PC)	Glycerophospholipids	0.68	0.374445	0.58	0.472138	1.33	0.279447
P3967	878.57	8.87484	3547_([M+H]+)_PC 44a:12_C52H80NO8P	NF	Glycerophosphocholines (PC)	Glycerophospholipids	0.32	0.115369	0.16	0.0293489	0.39	0.0591604
P2733	720.59	9.92948	3580_([M+H]+)_PC 32e:0_C40H82NO7P	CHEBI:85845	Glycerophosphocholines (PC)	Glycerophospholipids	0.64	0.222892	0.57	0.566343	1.3	0.350283
P2710	718.575	9.86455	3581_([M+H]+)_PC 32e:1_C40H80NO7P // 3676_([M+H]+)_PC 32p:0_C40H80NO7P	CHEBI:72347 // NF	Glycerophosphocholines (PC)	Glycerophospholipids	0.58	0.153592	0.79	0.951401	1.73	0.250479
P2822	732.591	10.7046	3585_([M+H]+)_PC 33e:1_C41H82NO7P // 3679_([M+H]+)_PC 33p:0_C41H82NO7P	NF // NF	Glycerophosphocholines (PC)	Glycerophospholipids	0.67	0.37397	0.59	0.531692	1.11	0.814695
P2802	730.576	10.2891	3586_([M+H]+)_PC 33e:2_C41H80NO7P // 3680_([M+H]+)_PC 33p:1_C41H80NO7P	NF // NF	Glycerophosphocholines (PC)	Glycerophospholipids	0.72	0.501359	0.62	0.601246	1.18	0.772577
P2788	728.559	10.2377	3587_([M+H]+)_PC 33e:3_C41H78NO7P // 3681_([M+H]+)_PC 33p:2_C41H78NO7P	NF // NF	Glycerophosphocholines (PC)	Glycerophospholipids	0.59	0.320218	0.51	0.45641	1	0.862712
P2766	724.528	9.60348	3589_([M+H]+)_PC 33e:5_C41H74NO7P // 3683_([M+H]+)_PC 33p:4_C41H74NO7P	NF // NF	Glycerophosphocholines (PC)	Glycerophospholipids	0.58	0.181085	0.58	0.617721	1.23	0.535811
P2948	748.623	10.7669	3591_([M+H]+)_PC 34e:0_C42H86NO7P	CHEBI:67077	Glycerophosphocholines (PC)	Glycerophospholipids	0.71	0.483126	0.54	0.711587	1.03	0.946766
P2932	746.607	10.2125	3592_([M+H]+)_PC 34e:1_C42H84NO7P // 3685_([M+H]+)_PC 34p:0_C42H84NO7P	CHEBI:67076 // NF	Glycerophosphocholines (PC)	Glycerophospholipids	0.71	0.354325	0.55	0.503317	1.09	0.842716
P2915	744.591	9.77276	3593_([M+H]+)_PC 34e:2_C42H82NO7P // 3686_([M+H]+)_PC 34p:1_C42H82NO7P	CHEBI:64544 // NF	Glycerophosphocholines (PC)	Glycerophospholipids	0.74	0.50623	0.6	0.570726	1.14	0.804136
P2900	742.575	9.6768	3594_([M+H]+)_PC 34e:3_C42H80NO7P // 3687_([M+H]+)_PC 34p:2_C42H80NO7P	CHEBI:64541 // CHEBI:85861	Glycerophosphocholines (PC)	Glycerophospholipids	0.64	0.314691	0.42	0.14949	0.72	0.292075
P3025	760.622	11.3669	3598_([M+H]+)_PC 35e:1_C43H86NO7P // 3690_([M+H]+)_PC 35p:0_C43H86NO7P	NF // NF	Glycerophosphocholines (PC)	Glycerophospholipids	0.68	0.371711	0.64	0.571849	1.26	0.661208
P3006	758.606	10.9833	3599_([M+H]+)_PC 35e:2_C43H84NO7P // 3691_([M+H]+)_PC 35p:1_C43H84NO7P	NF // NF	Glycerophosphocholines (PC)	Glycerophospholipids	0.79	0.490095	0.66	0.618297	1.2	0.623718
P2955	750.544	9.59203	3603_([M+H]+)_PC 35e:6_C43H76NO7P // 3695_([M+H]+)_PC 35p:5_C43H76NO7P	NF // NF	Glycerophosphocholines (PC)	Glycerophospholipids	0.69	0.392658	0.73	0.727499	1.37	0.377479
P2945	748.528	9.52567	3604_([M+H]+)_PC 35e:7_C43H74NO7P // 3696_([M+H]+)_PC 35p:6_C43H74NO7P	NF // NF	Glycerophosphocholines (PC)	Glycerophospholipids	0.57	0.215402	0.61	0.648825	1.23	0.532069
P3134	774.638	11.0035	3606_([M+H]+)_PC 36e:1_C44H88NO7P // 3697_([M+H]+)_PC 36p:0_C44H88NO7P	CHEBI:67066 // NF	Glycerophosphocholines (PC)	Glycerophospholipids	0.7	0.520036	0.39	0.278739	0.71	0.29849
P3119	772.622	10.548	3607_([M+H]+)_PC 36e:2_C44H86NO7P // 3698_([M+H]+)_PC 36p:1_C44H86NO7P	CHEBI:67065 // NF	Glycerophosphocholines (PC)	Glycerophospholipids	0.68	0.338095	0.53	0.433948	0.89	0.598993
P3102	770.607	10.3818	3608_([M+H]+)_PC 36e:3_C44H84NO7P // 3699_([M+H]+)_PC 36p:2_C44H84NO7P	CHEBI:64537 // CHEBI:85862	Glycerophosphocholines (PC)	Glycerophospholipids	0.7	0.366969	0.51	0.375224	0.88	0.559329
P3089	768.591	9.81092	3609_([M+H]+)_PC 36e:4_C44H82NO7P // 3700_([M+H]+)_PC 36p:3_C44H82NO7P	CHEBI:67064 // NF	Glycerophosphocholines (PC)	Glycerophospholipids	0.75	0.436075	0.59	0.53809	1.28	0.461479
P3183	782.605	11.063	3616_([M+H]+)_PC 37e:4_C45H84NO7P // 3706_([M+H]+)_PC 37p:3_C45H84NO7P	NF // NF	Glycerophosphocholines (PC)	Glycerophospholipids	0.81	0.429033	0.73	0.767188	1.26	0.355901
P3158	778.575	10.2828	3618_([M+H]+)_PC 37e:6_C45H80NO7P // 3708_([M+H]+)_PC 37p:5_C45H80NO7P	NF // NF	Glycerophosphocholines (PC)	Glycerophospholipids	0.63	0.235554	0.68	0.714467	1.13	0.790043
P3128	774.543	9.72116	3620_([M+H]+)_PC 37e:8_C45H76NO7P // 3710_([M+H]+)_PC 37p:7_C45H76NO7P	NF // NF	Glycerophosphocholines (PC)	Glycerophospholipids	0.52	0.211037	0.4	0.296531	0.92	0.751869
P3363	802.669	11.7742	3622_([M+H]+)_PC 38e:1_C46H92NO7P // 3711_([M+H]+)_PC 38p:0_C46H92NO7P	CHEBI:67070 // NF	Glycerophosphocholines (PC)	Glycerophospholipids	0.66	0.354205	0.57	0.43318	0.95	0.766082
P3349	800.654	11.3517	3623_([M+H]+)_PC 38e:2_C46H90NO7P // 3712_([M+H]+)_PC 38p:1_C46H90NO7P	CHEBI:67069 // NF	Glycerophosphocholines (PC)	Glycerophospholipids	0.67	0.295831	0.63	0.541205	1.01	0.793848
P3311	796.622	10.5552	3625_([M+H]+)_PC 38e:4_C46H86NO7P // 3714_([M+H]+)_PC 38p:3_C46H86NO7P	CHEBI:64480 // NF	Glycerophosphocholines (PC)	Glycerophospholipids	0.71	0.325552	0.57	0.528008	1.21	0.642539
P3295	794.606	10.3652	3626_([M+H]+)_PC 38e:5_C46H84NO7P // 3715_([M+H]+)_PC 38p:4_C46H84NO7P	CHEBI:64445 // CHEBI:85863	Glycerophosphocholines (PC)	Glycerophospholipids	0.69	0.317069	0.54	0.45893	1.09	0.884597
P3294	794.606	9.94874	3626_([M+H]+)_PC 38e:5_C46H84NO7P // 3715_([M+H]+)_PC 38p:4_C46H84NO7P	CHEBI:64445 // CHEBI:85863	Glycerophosphocholines (PC)	Glycerophospholipids	0.71	0.356218	0.51	0.348329	1.09	0.884571
P3249	790.574	9.61987	3628_([M+H]+)_PC 38e:7_C46H80NO7P // 3717_([M+H]+)_PC 38p:6_C46H80NO7P	CHEBI:64539 // NF	Glycerophosphocholines (PC)	Glycerophospholipids	0.55	0.186853	0.46	0.370268	0.93	0.693831
P3411	808.622	11.1384	3634_([M+H]+)_PC 39e:5_C47H86NO7P // 3722_([M+H]+)_PC 39p:4_C47H86NO7P	NF // NF	Glycerophosphocholines (PC)	Glycerophospholipids	0.61	0.244441	0.58	0.584544	1.2	0.705569
P3397	806.606	10.9757	3635_([M+H]+)_PC 39e:6_C47H84NO7P // 3723_([M+H]+)_PC 39p:5_C47H84NO7P	NF // NF	Glycerophosphocholines (PC)	Glycerophospholipids	0.67	0.248451	0.62	0.619024	1.08	0.914554
P3569	828.685	12.0928	3639_([M+H]+)_PC 40e:2_C48H94NO7P // 3726_([M+H]+)_PC 40p:1_C48H94NO7P	CHEBI:72348 // NF	Glycerophosphocholines (PC)	Glycerophospholipids	0.64	0.40256	0.45	0.258571	1.01	0.765269
P3530	824.654	11.3489	3641_([M+H]+)_PC 40e:4_C48H90NO7P // 3728_([M+H]+)_PC 40p:3_C48H90NO7P	CHEBI:85571 // CHEBI:85776	Glycerophosphocholines (PC)	Glycerophospholipids	0.86	0.670451	0.58	0.552074	1.19	0.602185
P3517	822.638	10.6881	3642_([M+H]+)_PC 40e:5_C48H88NO7P // 3729_([M+H]+)_PC 40p:4_C48H88NO7P	NF // NF	Glycerophosphocholines (PC)	Glycerophospholipids	0.7	0.311337	0.48	0.249098	1.13	0.731663
P3502	820.622	10.4879	3643_([M+H]+)_PC 40e:6_C48H86NO7P // 3730_([M+H]+)_PC 40p:5_C48H86NO7P	CHEBI:64533 // NF	Glycerophosphocholines (PC)	Glycerophospholipids	0.65	0.159376	0.4	0.22038	0.88	0.646015
P3826	860.748	7.81638	3647_([M+H]+)_PC 42e:0_C50H102NO7P	CHEBI:85582	Glycerophosphocholines (PC)	Glycerophospholipids	0.74	0.357365	0.82	0.892284	1.46	0.146689
P3749	852.685	12.0602	3651_([M+H]+)_PC 42e:4_C50H94NO7P // 3736_([M+H]+)_PC 42p:3_C50H94NO7P	CHEBI:85588 // CHEBI:85774	Glycerophosphocholines (PC)	Glycerophospholipids	0.57	0.205191	0.58	0.62584	1.1	0.777593
P3714	848.654	11.269	3653_([M+H]+)_PC 42e:6_C50H90NO7P // 3738_([M+H]+)_PC 42p:5_C50H90NO7P	CHEBI:85847 // NF	Glycerophosphocholines (PC)	Glycerophospholipids	0.66	0.290741	0.44	0.294195	0.87	0.569907
P3702	846.638	10.6634	3654_([M+H]+)_PC 42e:7_C50H88NO7P // 3739_([M+H]+)_PC 42p:6_C50H88NO7P	NF // NF	Glycerophosphocholines (PC)	Glycerophospholipids	0.49	0.192844	0.24	0.105933	0.69	0.359112
P3701	846.638	11.1336	3654_([M+H]+)_PC 42e:7_C50H88NO7P // 3739_([M+H]+)_PC 42p:6_C50H88NO7P	NF // NF	Glycerophosphocholines (PC)	Glycerophospholipids	0.62	0.272245	0.42	0.276597	0.93	0.713931
N2718	718.543	9.17932	3830_([M-H]-)_PE 34a:0_C39H78NO8P	CHEBI:71718	Glycerophosphoethanolamines (PE)	Glycerophospholipids	0.92	0.5214	0.67	0.770649	1.38	0.188707
N2711	716.528	9.35247	3831_([M-H]-)_PE 34a:1_C39H76NO8P	CHEBI:71720	Glycerophosphoethanolamines (PE)	Glycerophospholipids	0.79	0.353584	0.87	0.797198	1.97	0.194434
N2703	714.512	8.93513	3832_([M-H]-)_PE 34a:2_C39H74NO8P	CHEBI:71721	Glycerophosphoethanolamines (PE)	Glycerophospholipids	0.76	0.255591	0.98	0.856319	1.69	0.29395
N2834	744.559	9.4321	3845_([M-H]-)_PE 36a:1_C41H80NO8P	CHEBI:71727	Glycerophosphoethanolamines (PE)	Glycerophospholipids	0.89	0.614265	1	0.937231	1.32	0.244839
N2835	744.56	10.0154	3845_([M-H]-)_PE 36a:1_C41H80NO8P	CHEBI:71727	Glycerophosphoethanolamines (PE)	Glycerophospholipids	1.01	0.896275	0.88	0.92128	1.53	0.224008
N2828	742.543	9.60681	3846_([M-H]-)_PE 36a:2_C41H78NO8P	CHEBI:71728	Glycerophosphoethanolamines (PE)	Glycerophospholipids	0.79	0.337327	1.1	0.535446	1.51	0.236821
N2827	742.543	8.95108	3846_([M-H]-)_PE 36a:2_C41H78NO8P	CHEBI:71728	Glycerophosphoethanolamines (PE)	Glycerophospholipids	0.93	0.583057	0.94	0.884748	1.11	0.499432
N2821	740.528	9.16172	3847_([M-H]-)_PE 36a:3_C41H76NO8P	CHEBI:71729	Glycerophosphoethanolamines (PE)	Glycerophospholipids	0.68	0.165913	0.77	0.671883	1.03	0.870039
N2808	738.512	9.02012	3848_([M-H]-)_PE 36a:4_C41H74NO8P	CHEBI:71730	Glycerophosphoethanolamines (PE)	Glycerophospholipids	0.71	0.126196	0.85	0.835697	1.18	0.331018
N2799	736.497	8.57254	3849_([M-H]-)_PE 36a:5_C41H72NO8P	CHEBI:71731	Glycerophosphoethanolamines (PE)	Glycerophospholipids	0.49	0.0347537	0.38	0.128024	0.55	0.0766554
N2998	772.591	10.1698	3862_([M-H]-)_PE 38a:1_C43H84NO8P	CHEBI:71734	Glycerophosphoethanolamines (PE)	Glycerophospholipids	1.17	0.850691	0.84	0.826906	1.09	0.705076
N2987	770.574	9.67025	3863_([M-H]-)_PE 38a:2_C43H82NO8P	CHEBI:71735	Glycerophosphoethanolamines (PE)	Glycerophospholipids	0.87	0.430194	0.83	0.584375	0.85	0.31729
N2976	768.559	9.23472	3864_([M-H]-)_PE 38a:3_C43H80NO8P	CHEBI:71736	Glycerophosphoethanolamines (PE)	Glycerophospholipids	1.06	0.946982	0.48	0.0775326	0.48	0.0192056
N2962	766.543	9.69285	3865_([M-H]-)_PE 38a:4_C43H78NO8P	CHEBI:71737	Glycerophosphoethanolamines (PE)	Glycerophospholipids	0.8	0.2522	1.31	0.237125	1.71	0.0300037
N2961	766.543	9.02653	3865_([M-H]-)_PE 38a:4_C43H78NO8P	CHEBI:71737	Glycerophosphoethanolamines (PE)	Glycerophospholipids	0.9	0.537144	0.88	0.888687	0.94	0.895191
N2944	764.528	9.22192	3866_([M-H]-)_PE 38a:5_C43H76NO8P	CHEBI:71738	Glycerophosphoethanolamines (PE)	Glycerophospholipids	0.75	0.217398	0.79	0.751339	1.14	0.701802
N2922	762.512	8.95106	3867_([M-H]-)_PE 38a:6_C43H74NO8P	CHEBI:71739	Glycerophosphoethanolamines (PE)	Glycerophospholipids	0.77	0.15853	1.03	0.700565	1.64	0.15087
N3143	796.591	9.99607	3884_([M-H]-)_PE 40a:3_C45H84NO8P	CHEBI:71743	Glycerophosphoethanolamines (PE)	Glycerophospholipids	0.41	0.0691794	0.46	0.14585	0.45	0.0790038
N3132	794.575	9.73668	3885_([M-H]-)_PE 40a:4_C45H82NO8P	CHEBI:71744	Glycerophosphoethanolamines (PE)	Glycerophospholipids	0.9	0.512904	0.93	0.940723	0.89	0.778008
N3112	792.559	9.25516	3886_([M-H]-)_PE 40a:5_C45H80NO8P	CHEBI:71745	Glycerophosphoethanolamines (PE)	Glycerophospholipids	0.89	0.558346	0.61	0.345278	0.7	0.366997
N3089	790.544	9.61933	3887_([M-H]-)_PE 40a:6_C45H78NO8P	CHEBI:71746	Glycerophosphoethanolamines (PE)	Glycerophospholipids	0.85	0.433866	1.94	0.0281834	2.36	0.0469027
N3088	790.543	8.94565	3887_([M-H]-)_PE 40a:6_C45H78NO8P	CHEBI:71746	Glycerophosphoethanolamines (PE)	Glycerophospholipids	0.8	0.143053	0.7	0.236938	0.81	0.219253
N3070	788.528	9.15799	3888_([M-H]-)_PE 40a:7_C45H76NO8P	CHEBI:91054	Glycerophosphoethanolamines (PE)	Glycerophospholipids	0.72	0.15094	0.86	0.941401	1.28	0.455785
N3276	818.575	9.65722	3909_([M-H]-)_PE 42a:6_C47H82NO8P	CHEBI:71753	Glycerophosphoethanolamines (PE)	Glycerophospholipids	0.87	0.37599	0.8	0.48639	0.76	0.308941
N3255	816.56	9.16493	3910_([M-H]-)_PE 42a:7_C47H80NO8P	NF	Glycerophosphoethanolamines (PE)	Glycerophospholipids	0.77	0.404867	0.47	0.104266	0.48	0.048742
N3379	834.607	10.4987	3919_([M-H]-)_PE 43a:5_C48H86NO8P	NF	Glycerophosphoethanolamines (PE)	Glycerophospholipids	1.06	0.926628	0.37	0.362017	0.5	0.132703
N3755	888.555	9.71173	3972_([M-H]-)_PE 48a:12_C53H80NO8P	NF	Glycerophosphoethanolamines (PE)	Glycerophospholipids	1.01	0.881042	1.66	0.0520514	0.99	0.862256
N2657	702.549	9.86404	4008_([M-H]-)_PE 34e:1_C39H78NO7P // 4098_([M-H]-)_PE 34p:0_C39H78NO7P	CHEBI:71840 // NF	Glycerophosphoethanolamines (PE)	Glycerophospholipids	1.12	0.800398	0.56	0.572663	0.59	0.303918
N2649	700.533	9.82377	4009_([M-H]-)_PE 34e:2_C39H76NO7P // 4099_([M-H]-)_PE 34p:1_C39H76NO7P	CHEBI:71841 // NF	Glycerophosphoethanolamines (PE)	Glycerophospholipids	0.83	0.462235	0.44	0.211569	0.6	0.122144
N2648	700.533	9.43677	4009_([M-H]-)_PE 34e:2_C39H76NO7P // 4099_([M-H]-)_PE 34p:1_C39H76NO7P	CHEBI:71841 // NF	Glycerophosphoethanolamines (PE)	Glycerophospholipids	1.1	0.901687	0.73	0.705367	0.69	0.299976
N2642	698.517	9.38854	4010_([M-H]-)_PE 34e:3_C39H74NO7P // 4100_([M-H]-)_PE 34p:2_C39H74NO7P	CHEBI:71842 // NF	Glycerophosphoethanolamines (PE)	Glycerophospholipids	0.89	0.594426	0.58	0.310004	0.63	0.0839174
N2765	728.565	10.1243	4017_([M-H]-)_PE 36e:1_C41H80NO7P // 4106_([M-H]-)_PE 36p:0_C41H80NO7P	CHEBI:71847 // NF	Glycerophosphoethanolamines (PE)	Glycerophospholipids	1.13	0.859733	0.62	0.530069	0.73	0.152505
N2773	730.581	10.538	4018_([M-H]-)_PE 36e:2_C41H82NO7P // 4107_([M-H]-)_PE 36p:1_C41H82NO7P	CHEBI:71847 // NF	Glycerophosphoethanolamines (PE)	Glycerophospholipids	1.13	0.938899	0.61	0.583084	0.76	0.391653
N2753	726.549	10.0734	4019_([M-H]-)_PE 36e:3_C41H78NO7P // 4108_([M-H]-)_PE 36p:2_C41H78NO7P	CHEBI:71849 // NF	Glycerophosphoethanolamines (PE)	Glycerophospholipids	0.96	0.749894	0.55	0.40798	0.62	0.0605336
N2740	724.533	9.5576	4020_([M-H]-)_PE 36e:4_C41H76NO7P // 4109_([M-H]-)_PE 36p:3_C41H76NO7P	CHEBI:71850 // NF	Glycerophosphoethanolamines (PE)	Glycerophospholipids	0.81	0.452622	0.6	0.290158	0.68	0.299729
N2732	722.517	9.44471	4021_([M-H]-)_PE 36e:5_C41H74NO7P // 4110_([M-H]-)_PE 36p:4_C41H74NO7P	CHEBI:71851 // NF	Glycerophosphoethanolamines (PE)	Glycerophospholipids	0.86	0.453604	0.66	0.523893	0.8	0.324457
N2903	758.612	11.1984	4030_([M-H]-)_PE 38e:1_C43H86NO7P // 4117_([M-H]-)_PE 38p:0_C43H86NO7P	CHEBI:71854 // NF	Glycerophosphoethanolamines (PE)	Glycerophospholipids	1.13	0.888262	0.56	0.545558	0.85	0.568778
N2896	756.596	10.8167	4031_([M-H]-)_PE 38e:2_C43H84NO7P // 4118_([M-H]-)_PE 38p:1_C43H84NO7P	CHEBI:71855 // NF	Glycerophosphoethanolamines (PE)	Glycerophospholipids	1.09	0.998257	0.63	0.588196	0.78	0.146604
N2880	752.565	10.1915	4033_([M-H]-)_PE 38e:4_C43H80NO7P // 4120_([M-H]-)_PE 38p:3_C43H80NO7P	CHEBI:71857 // NF	Glycerophosphoethanolamines (PE)	Glycerophospholipids	0.97	0.702515	0.67	0.67865	0.81	0.363073
N2869	750.549	10.1311	4034_([M-H]-)_PE 38e:5_C43H78NO7P // 4121_([M-H]-)_PE 38p:4_C43H78NO7P	CHEBI:71858 // NF	Glycerophosphoethanolamines (PE)	Glycerophospholipids	0.97	0.693107	0.6	0.625928	0.77	0.243504
N2855	748.532	9.4292	4035_([M-H]-)_PE 38e:6_C43H76NO7P // 4122_([M-H]-)_PE 38p:5_C43H76NO7P	CHEBI:71859 // NF	Glycerophosphoethanolamines (PE)	Glycerophospholipids	0.95	0.712907	0.78	0.647922	0.89	0.586899
N2846	746.517	9.36565	4036_([M-H]-)_PE 38e:7_C43H74NO7P // 4123_([M-H]-)_PE 38p:6_C43H74NO7P	NF // NF	Glycerophosphoethanolamines (PE)	Glycerophospholipids	0.84	0.402202	0.78	0.670793	0.83	0.380529
N3043	780.597	10.8837	4048_([M-H]-)_PE 40e:4_C45H84NO7P // 4133_([M-H]-)_PE 40p:3_C45H84NO7P	CHEBI:71864 // NF	Glycerophosphoethanolamines (PE)	Glycerophospholipids	1.09	0.97181	0.64	0.722028	0.87	0.531677
N3030	778.581	10.8188	4049_([M-H]-)_PE 40e:5_C45H82NO7P // 4134_([M-H]-)_PE 40p:4_C45H82NO7P	CHEBI:71865 // NF	Glycerophosphoethanolamines (PE)	Glycerophospholipids	1.25	0.68241	0.54	0.716572	0.79	0.384752
N3031	778.582	10.2856	4049_([M-H]-)_PE 40e:5_C45H82NO7P // 4134_([M-H]-)_PE 40p:4_C45H82NO7P	CHEBI:71865 // NF	Glycerophosphoethanolamines (PE)	Glycerophospholipids	1.29	0.688706	0.68	0.688919	0.84	0.531468
N3017	776.565	10.1137	4050_([M-H]-)_PE 40e:6_C45H80NO7P // 4135_([M-H]-)_PE 40p:5_C45H80NO7P	CHEBI:71866 // NF	Glycerophosphoethanolamines (PE)	Glycerophospholipids	0.92	0.599062	0.67	0.699536	0.73	0.198381
N3006	774.549	10.05	4051_([M-H]-)_PE 40e:7_C45H78NO7P // 4136_([M-H]-)_PE 40p:6_C45H78NO7P	NF // NF	Glycerophosphoethanolamines (PE)	Glycerophospholipids	0.93	0.646373	0.65	0.683197	0.77	0.282362
N3216	808.628	11.3358	4065_([M-H]-)_PE 42e:4_C47H88NO7P // 4148_([M-H]-)_PE 42p:3_C47H88NO7P	CHEBI:71871 // NF	Glycerophosphoethanolamines (PE)	Glycerophospholipids	1.42	0.609105	0.35	0.342475	0.93	0.626767
N3187	804.597	10.8072	4067_([M-H]-)_PE 42e:6_C47H84NO7P // 4150_([M-H]-)_PE 42p:5_C47H84NO7P	CHEBI:71873 // NF	Glycerophosphoethanolamines (PE)	Glycerophospholipids	0.96	0.655067	0.53	0.511175	0.65	0.0952454
N3173	802.581	10.7339	4068_([M-H]-)_PE 42e:7_C47H82NO7P // 4151_([M-H]-)_PE 42p:6_C47H82NO7P	NF // NF	Glycerophosphoethanolamines (PE)	Glycerophospholipids	1.09	0.904835	0.62	0.764214	0.88	0.654703
N3204	807.508	8.43342	4519_([M-H]-)_PI 32a:1_C41H77O13P	NF	Glycerophosphoinositols (PI)	Glycerophospholipids	0.86	0.553014	0.27	0.0504703	0.71	0.410145
N3387	835.539	9.07902	4531_([M-H]-)_PI 34a:1_C43H81O13P	NF	Glycerophosphoinositols (PI)	Glycerophospholipids	1.1	0.936773	0.57	0.309522	1.07	0.945418
N3370	833.524	8.65246	4532_([M-H]-)_PI 34a:2_C43H79O13P	NF	Glycerophosphoinositols (PI)	Glycerophospholipids	1	0.84234	0.54	0.396144	0.97	0.822375
N3352	831.509	8.23314	4533_([M-H]-)_PI 34a:3_C43H77O13P	NF	Glycerophosphoinositols (PI)	Glycerophospholipids	0.67	0.173127	0.23	0.0515607	0.43	0.0985219
N3476	847.537	8.99374	4539_([M-H]-)_PI 35a:2_C44H81O13P	NF	Glycerophosphoinositols (PI)	Glycerophospholipids	1.2	0.580776	0.55	0.404646	1.03	0.792368
N3604	863.571	9.76131	4544_([M-H]-)_PI 36a:1_C45H85O13P	NF	Glycerophosphoinositols (PI)	Glycerophospholipids	1.27	0.697732	0.57	0.419433	1.21	0.39516
N3588	861.555	9.3335	4545_([M-H]-)_PI 36a:2_C45H83O13P	NF	Glycerophosphoinositols (PI)	Glycerophospholipids	1.09	0.960688	0.59	0.420962	0.9	0.656345
N3570	859.536	8.84136	4546_([M-H]-)_PI 36a:3_C45H81O13P	NF	Glycerophosphoinositols (PI)	Glycerophospholipids	0.85	0.462572	0.49	0.0613885	0.52	0.0295601
N3553	857.524	8.73329	4547_([M-H]-)_PI 36a:4_C45H79O13P	NF	Glycerophosphoinositols (PI)	Glycerophospholipids	0.98	0.724401	0.55	0.229951	0.69	0.129847
N3536	855.509	8.30347	4548_([M-H]-)_PI 36a:5_C45H77O13P	NF	Glycerophosphoinositols (PI)	Glycerophospholipids	0.62	0.182991	0.22	0.0149505	0.3	0.0189641
N3641	871.538	9.08052	4556_([M-H]-)_PI 37a:4_C46H81O13P	NF	Glycerophosphoinositols (PI)	Glycerophospholipids	1.04	0.953863	0.54	0.500451	0.89	0.773243
N3762	889.588	10.0243	4562_([M-H]-)_PI 38a:2_C47H87O13P	NF	Glycerophosphoinositols (PI)	Glycerophospholipids	0.94	0.584886	0.27	0.00644399	0.59	0.303006
N3737	885.555	9.40818	4564_([M-H]-)_PI 38a:4_C47H83O13P	NF	Glycerophosphoinositols (PI)	Glycerophospholipids	0.94	0.619508	0.66	0.474298	0.76	0.277048
N3722	883.538	8.94319	4565_([M-H]-)_PI 38a:5_C47H81O13P	NF	Glycerophosphoinositols (PI)	Glycerophospholipids	0.81	0.420016	0.42	0.0213321	0.34	0.00870099
N3707	881.524	8.67195	4566_([M-H]-)_PI 38a:6_C47H79O13P	NF	Glycerophosphoinositols (PI)	Glycerophospholipids	0.89	0.556238	0.46	0.196164	0.63	0.0941946
N3796	899.57	9.78313	4574_([M-H]-)_PI 39a:4_C48H85O13P	NF	Glycerophosphoinositols (PI)	Glycerophospholipids	0.77	0.267322	0.24	0.152377	0.44	0.280518
N3853	911.571	9.51936	4585_([M-H]-)_PI 40a:5_C49H85O13P	NF	Glycerophosphoinositols (PI)	Glycerophospholipids	1.08	0.911888	0.66	0.206225	0.69	0.333123
N3844	909.555	9.34889	4586_([M-H]-)_PI 40a:6_C49H83O13P	NF	Glycerophosphoinositols (PI)	Glycerophospholipids	0.94	0.654838	0.52	0.255043	0.68	0.248162
N3835	907.54	8.86735	4587_([M-H]-)_PI 40a:7_C49H81O13P	NF	Glycerophosphoinositols (PI)	Glycerophospholipids	0.59	0.787787	0.33	0.0283308	0.11	0.00400299
N2665	704.455	8.06574	5012_([M-H]-)_PS 30a:1_C36H68NO10P	NF	Glycerophosphoserines (PS)	Glycerophospholipids	0.86	0.694522	0.69	0.764446	1.23	0.25149
N3091	790.565	9.07713	5047_([M-H]-)_PS 36a:0_C42H82NO10P	NF	Glycerophosphoserines (PS)	Glycerophospholipids	1.05	0.909848	0.71	0.439237	0.91	0.656484
N3259	816.581	8.46384	5065_([M-H]-)_PS 38a:1_C44H84NO10P	NF	Glycerophosphoserines (PS)	Glycerophospholipids	0.51	0.0962022	0.37	0.115044	0.42	0.13184
N3231	812.549	8.74539	5067_([M-H]-)_PS 38a:3_C44H80NO10P	NF	Glycerophosphoserines (PS)	Glycerophospholipids	0.84	0.466881	0.5	0.638561	0.76	0.456424
N3471	846.629	10.5598	5083_([M-H]-)_PS 40a:0_C46H90NO10P	NF	Glycerophosphoserines (PS)	Glycerophospholipids	1.1	0.997993	0.47	0.222163	0.73	0.534918
N3376	834.531	9.69573	5090_([M-H]-)_PS 40a:6_C46H78NO10P	NF	Glycerophosphoserines (PS)	Glycerophospholipids	0.77	0.194216	1.5	0.0668492	2	0.00640192
N3362	832.516	9.22323	5091_([M-H]-)_PS 40a:7_C46H76NO10P	NF	Glycerophosphoserines (PS)	Glycerophospholipids	0.68	0.134287	0.98	0.974839	0.91	0.786407
N3549	856.613	9.98499	5096_([M-H]-)_PS 41a:2_C47H88NO10P	NF	Glycerophosphoserines (PS)	Glycerophospholipids	0.8	0.756467	0.29	0.0376806	0.22	0.00843323
N3561	858.531	9.61667	5112_([M-H]-)_PS 42a:8_C48H78NO10P	NF	Glycerophosphoserines (PS)	Glycerophospholipids	0.95	0.719693	2.52	0.00172107	3.5	0.0342516
N2925	762.57	9.30889	5142_([M-H]-)_PS 35e:0_C41H82NO9P	NF	Glycerophosphoserines (PS)	Glycerophospholipids	0.92	0.514699	0.44	0.389333	0.77	0.500422
N3140	796.548	9.43203	5147_([M-H]-)_PS 38e:4_C44H80NO9P	NF	Glycerophosphoserines (PS)	Glycerophospholipids	1.08	0.877436	1.03	0.959079	1.2	0.461264
N3129	794.532	8.95108	5148_([M-H]-)_PS 38e:5_C44H78NO9P	NF	Glycerophosphoserines (PS)	Glycerophospholipids	0.95	0.683559	1	0.946504	0.95	0.673917
N3292	820.549	9.22883	5193_([M-H]-)_PS 40p:5_C46H80NO9P	NF	Glycerophosphoserines (PS)	Glycerophospholipids	0.77	0.406786	0.37	0.0375371	0.31	0.0312236
N3271	818.532	9.03041	5194_([M-H]-)_PS 40p:6_C46H78NO9P	NF	Glycerophosphoserines (PS)	Glycerophospholipids	0.9	0.536908	0.92	0.978781	0.94	0.904075
N3272	818.538	10.1311	5194_([M-H]-)_PS 40p:6_C46H78NO9P	NF	Glycerophosphoserines (PS)	Glycerophospholipids	0.94	0.618781	0.65	0.669191	0.78	0.330998
P1619	580.398	6.65429	3105_([M+NH4]+)_PA 26a:1_C29H55O8P	NF	Glycerophosphotes (PA)	Glycerophospholipids	0.82	0.569264	0.75	0.631749	1.33	0.598239
P813	454.293	4.12499	2106_([M+H]+)_LPC 13a:0_C21H44NO7P	NF	Lyso-Glycerophosphocholines (LPC)	Glycerophospholipids	0.64	0.175992	0.83	0.750904	1.53	0.175557
P874	468.309	2.71686	2111_([M+H]+)_LPC 14a:0_C22H46NO7P	CHEBI:64483	Lyso-Glycerophosphocholines (LPC)	Glycerophospholipids	0.68	0.263259	0.6	0.223369	1	0.864722
P946	482.325	3.37031	2116_([M+H]+)_LPC 15a:0_C23H48NO7P	CHEBI:72736	Lyso-Glycerophosphocholines (LPC)	Glycerophospholipids	0.67	0.404004	0.55	0.442405	1.15	0.894766
P935	480.309	4.54723	2117_([M+H]+)_LPC 15a:1_C23H46NO7P	NF	Lyso-Glycerophosphocholines (LPC)	Glycerophospholipids	0.62	0.236428	0.64	0.323557	1.26	0.187923
P918	478.293	3.57974	2118_([M+H]+)_LPC 15a:2_C23H44NO7P	NF	Lyso-Glycerophosphocholines (LPC)	Glycerophospholipids	0.6	0.271378	0.63	0.410093	1.32	0.23439
P1019	496.341	4.18964	2121_([M+H]+)_LPC 16a:0_C24H50NO7P	CHEBI:64563	Lyso-Glycerophosphocholines (LPC)	Glycerophospholipids	0.69	0.272647	0.74	0.588115	1.36	0.446689
P1020	496.34	3.77546	2121_([M+H]+)_LPC 16a:0_C24H50NO7P	CHEBI:64563	Lyso-Glycerophosphocholines (LPC)	Glycerophospholipids	0.68	0.323627	0.66	0.586063	1.41	0.522134
P1007	494.325	3.12854	2122_([M+H]+)_LPC 16a:1_C24H48NO7P	CHEBI:64560	Lyso-Glycerophosphocholines (LPC)	Glycerophospholipids	0.56	0.168822	0.37	0.0499638	0.59	0.0904157
P1108	510.356	4.81509	2126_([M+H]+)_LPC 17a:0_C25H52NO7P	CHEBI:72737	Lyso-Glycerophosphocholines (LPC)	Glycerophospholipids	0.71	0.463248	0.7	0.682481	1.47	0.454824
P1088	508.341	3.88387	2127_([M+H]+)_LPC 17a:1_C25H50NO7P	CHEBI:73853	Lyso-Glycerophosphocholines (LPC)	Glycerophospholipids	0.65	0.438429	0.44	0.143698	0.76	0.326361
P1068	504.308	4.26703	2129_([M+H]+)_LPC 17a:3_C25H46NO7P	NF	Lyso-Glycerophosphocholines (LPC)	Glycerophospholipids	0.49	0.0837882	0.39	0.0357702	0.72	0.0787115
P1056	502.293	3.61955	2130_([M+H]+)_LPC 17a:4_C25H44NO7P	NF	Lyso-Glycerophosphocholines (LPC)	Glycerophospholipids	0.61	0.203323	0.7	0.522104	1.28	0.400584
P1200	524.372	5.25141	2133_([M+H]+)_LPC 18a:0_C26H54NO7P	CHEBI:64561	Lyso-Glycerophosphocholines (LPC)	Glycerophospholipids	0.67	0.220349	0.77	0.737825	1.27	0.582248
P1180	522.356	4.60522	2134_([M+H]+)_LPC 18a:1_C26H52NO7P	CHEBI:64566	Lyso-Glycerophosphocholines (LPC)	Glycerophospholipids	0.75	0.457049	0.65	0.286311	1.03	0.998852
P1164	520.341	3.6389	2135_([M+H]+)_LPC 18a:2_C26H50NO7P	CHEBI:64549	Lyso-Glycerophosphocholines (LPC)	Glycerophospholipids	0.67	0.286453	0.59	0.325781	0.97	0.772152
P1153	518.325	2.95506	2136_([M+H]+)_LPC 18a:3_C26H48NO7P	CHEBI:64565	Lyso-Glycerophosphocholines (LPC)	Glycerophospholipids	0.65	0.26305	0.68	0.551472	1.19	0.610816
P1289	538.388	5.65863	2138_([M+H]+)_LPC 19a:0_C27H56NO7P	NF	Lyso-Glycerophosphocholines (LPC)	Glycerophospholipids	0.61	0.263972	0.41	0.132844	0.83	0.552014
P1393	552.403	6.05195	2143_([M+H]+)_LPC 20a:0_C28H58NO7P	CHEBI:67058	Lyso-Glycerophosphocholines (LPC)	Glycerophospholipids	0.45	0.0576182	0.23	0.0190504	0.39	0.0456827
P1374	550.388	5.44742	2144_([M+H]+)_LPC 20a:1_C28H56NO7P	CHEBI:67057	Lyso-Glycerophosphocholines (LPC)	Glycerophospholipids	0.56	0.19935	0.23	0.00795132	0.32	0.0158263
P1345	546.356	4.32189	2146_([M+H]+)_LPC 20a:3_C28H52NO7P	CHEBI:64481	Lyso-Glycerophosphocholines (LPC)	Glycerophospholipids	0.46	0.0469933	0.28	0.0130503	0.41	0.0669181
P1334	544.34	3.65649	2147_([M+H]+)_LPC 20a:4_C28H50NO7P	CHEBI:64568	Lyso-Glycerophosphocholines (LPC)	Glycerophospholipids	0.68	0.299232	0.63	0.470953	1.01	0.851176
P1315	542.325	2.88778	2148_([M+H]+)_LPC 20a:5_C28H48NO7P	CHEBI:64559	Lyso-Glycerophosphocholines (LPC)	Glycerophospholipids	0.52	0.0748179	0.42	0.0418712	0.55	0.08056
P1621	580.434	6.85475	2155_([M+H]+)_LPC 22a:0_C30H62NO7P	CHEBI:67061	Lyso-Glycerophosphocholines (LPC)	Glycerophospholipids	0.54	0.1317	0.49	0.25842	0.95	0.700171
P1553	572.372	4.81957	2159_([M+H]+)_LPC 22a:4_C30H54NO7P	CHEBI:91312	Lyso-Glycerophosphocholines (LPC)	Glycerophospholipids	0.74	0.50126	0.52	0.23259	1.05	0.941662
P1538	570.355	4.13389	2160_([M+H]+)_LPC 22a:5_C30H52NO7P	CHEBI:74349	Lyso-Glycerophosphocholines (LPC)	Glycerophospholipids	0.73	0.419575	0.75	0.46791	1.3	0.550363
P1539	570.356	4.46696	2160_([M+H]+)_LPC 22a:5_C30H52NO7P	CHEBI:74349	Lyso-Glycerophosphocholines (LPC)	Glycerophospholipids	0.85	0.889947	0.68	0.622923	1.33	0.576223
P1519	568.34	3.59991	2161_([M+H]+)_LPC 22a:6_C30H50NO7P	CHEBI:64567	Lyso-Glycerophosphocholines (LPC)	Glycerophospholipids	0.58	0.176281	0.49	0.228903	0.87	0.553092
P1856	608.466	7.64684	2167_([M+H]+)_LPC 24a:0_C32H66NO7P	CHEBI:74470	Lyso-Glycerophosphocholines (LPC)	Glycerophospholipids	0.58	0.160238	0.52	0.365588	1.07	0.87071
P1837	606.45	6.95353	2168_([M+H]+)_LPC 24a:1_C32H64NO7P	CHEBI:74471	Lyso-Glycerophosphocholines (LPC)	Glycerophospholipids	0.64	0.252011	0.45	0.179647	0.87	0.537812
P948	482.364	4.88692	2175_([M+H]+)_LPC 16e:0_C24H52NO6P	CHEBI:64593	Lyso-Glycerophosphocholines (LPC)	Glycerophospholipids	0.77	0.455511	0.7	0.600411	1.14	0.740085
P936	480.346	4.85788	2177_([M+H]+)_LPC 16p:0_C24H50NO6P	CHEBI:73841	Lyso-Glycerophosphocholines (LPC)	Glycerophospholipids	0.65	0.281282	0.66	0.537532	1.12	0.884871
P920	478.327	4.19149	2178_([M+H]+)_LPC 16p:1_C24H48NO6P	NF	Lyso-Glycerophosphocholines (LPC)	Glycerophospholipids	0.71	0.243919	0.78	0.667827	1.26	0.585918
P1090	508.377	5.12373	2179_([M+H]+)_LPC 18p:0_C26H54NO6P	CHEBI:88779	Lyso-Glycerophosphocholines (LPC)	Glycerophospholipids	0.76	0.410051	0.54	0.29419	1.09	0.971113
P1071	504.349	4.61967	2181_([M+H]+)_LPC 18p:2_C26H50NO6P	CHEBI:85765	Lyso-Glycerophosphocholines (LPC)	Glycerophospholipids	0.75	0.218574	0.71	0.482156	0.97	0.930118
P1070	504.343	4.61789	2181_([M+H]+)_LPC 18p:2_C26H50NO6P	CHEBI:85765	Lyso-Glycerophosphocholines (LPC)	Glycerophospholipids	0.86	0.540678	0.62	0.220216	1.08	0.819321
P1212	526.33	3.65591	2187_([M+H]+)_LPC 20p:5_C28H48NO6P	NF	Lyso-Glycerophosphocholines (LPC)	Glycerophospholipids	0.67	0.426632	0.65	0.466575	0.85	0.544341
N1152	452.281	3.99729	2308_([M-H]-)_LPE 16a:0_C21H44NO7P	CHEBI:90452	Lyso-Glycerophosphoethanolamines (LPE)	Glycerophospholipids	0.91	0.515251	0.76	0.789085	0.94	0.797726
N1370	480.312	4.00326	2318_([M-H]-)_LPE 18a:0_C23H48NO7P	CHEBI:64576	Lyso-Glycerophosphoethanolamines (LPE)	Glycerophospholipids	0.95	0.634749	0.67	0.561046	0.92	0.648122
N1352	478.297	4.44798	2319_([M-H]-)_LPE 18a:1_C23H46NO7P	CHEBI:64575	Lyso-Glycerophosphoethanolamines (LPE)	Glycerophospholipids	0.93	0.632023	0.64	0.362354	0.84	0.448458
N1335	476.281	3.47291	2320_([M-H]-)_LPE 18a:2_C23H44NO7P	CHEBI:91296	Lyso-Glycerophosphoethanolamines (LPE)	Glycerophospholipids	0.88	0.551974	0.62	0.432675	0.95	0.716376
N1565	508.343	5.13503	2328_([M-H]-)_LPE 20a:0_C25H52NO7P	NF	Lyso-Glycerophosphoethanolamines (LPE)	Glycerophospholipids	0.92	0.548749	0.74	0.6931	0.83	0.353645
N1547	506.328	4.45947	2329_([M-H]-)_LPE 20a:1_C25H50NO7P	NF	Lyso-Glycerophosphoethanolamines (LPE)	Glycerophospholipids	1.11	0.995814	0.63	0.335302	0.7	0.152291
N1530	504.312	3.47399	2330_([M-H]-)_LPE 20a:2_C25H48NO7P	NF	Lyso-Glycerophosphoethanolamines (LPE)	Glycerophospholipids	0.91	0.565657	0.57	0.325338	0.66	0.0641054
N1517	502.297	4.1523	2331_([M-H]-)_LPE 20a:3_C25H46NO7P	CHEBI:72735	Lyso-Glycerophosphoethanolamines (LPE)	Glycerophospholipids	0.68	0.180138	0.36	0.0318357	0.52	0.102512
N1498	500.281	3.5139	2332_([M-H]-)_LPE 20a:4_C25H44NO7P	CHEBI:64569	Lyso-Glycerophosphoethanolamines (LPE)	Glycerophospholipids	0.88	0.464211	0.7	0.526355	0.87	0.519668
N1698	528.312	3.49487	2344_([M-H]-)_LPE 22a:4_C27H48NO7P	NF	Lyso-Glycerophosphoethanolamines (LPE)	Glycerophospholipids	0.94	0.649666	0.6	0.454372	0.68	0.204191
N2149	599.324	4.90103	2711_([M-H]-)_LPI 18a:0_C27H53O12P	NF	Lyso-Glycerophosphoinositols (LPI)	Glycerophospholipids	0.98	0.796939	0.63	0.606987	0.65	0.157178
N2127	595.292	3.13508	2713_([M-H]-)_LPI 18a:2_C27H49O12P	NF	Lyso-Glycerophosphoinositols (LPI)	Glycerophospholipids	1.17	0.817924	0.51	0.384502	0.61	0.0714309
N2264	619.292	3.16716	2722_([M-H]-)_LPI 20a:4_C29H49O12P	NF	Lyso-Glycerophosphoinositols (LPI)	Glycerophospholipids	1.07	0.985042	0.64	0.433098	0.59	0.0508559
N1943	568.269	3.51321	2931_([M-H]-)_LPS 22a:6_C28H44NO9P	NF	Lyso-Glycerophosphoserines (LPS)	Glycerophospholipids	0.86	0.433813	0.73	0.554158	0.9	0.595851
P1964	622.614	11.6132	130_([M+H]+)_Cer (d18:1/C22:0)_C40H79O3N	NF	Ceramides (Cer)	Sphingolipids	0.5	0.0516721	0.76	0.73199	1.56	0.132125
P2197	650.644	12.3215	134_([M+H]+)_Cer (d18:1/C24:0)_C42H83O3N	CHEBI:85777	Ceramides (Cer)	Sphingolipids	0.81	0.505716	1.78	0.138791	3.86	0.0252721
P2178	648.63	11.7254	135_([M+H]+)_Cer (d18:1/C24:1)_C42H81O3N	CHEBI:85812	Ceramides (Cer)	Sphingolipids	0.72	0.380736	0.86	0.878249	2.09	0.0241766
N4431	1277.82	10.0543	7028_([M-H]-)_9-OAc-GM3 (d18:1/22:0)_C65H118N2O22 // 7320_([M-H]-)_NeuGc-GM3(d18:1/24:1)_C65H118N2O22	NF // NF	Gangliosides	Sphingolipids	0.74	0.623192	0.35	0.334442	0.58	0.148475
N4363	1167.71	7.98965	7313_([M-H]-)_NeuGc-GM3(d18:1/16:0)_C57H104N2O22	NF	Gangliosides	Sphingolipids	1.1	0.6937	0.81	0.28815	1.09	0.625181
N4407	1251.8	9.97305	7319_([M-H]-)_NeuGc-GM3(d18:1/22:0)_C63H116N2O22	NF	Gangliosides	Sphingolipids	0.58	0.207062	0.31	0.254621	0.76	0.264596
N4434	1279.83	10.6551	7321_([M-H]-)_NeuGc-GM3(d18:1/24:0)_C65H120N2O22	NF	Gangliosides	Sphingolipids	0.76	0.462446	0.6	0.944713	1.21	0.381358
N4466	1370.79	7.87037	7324_([M-H]-)_NeuGc-GM2(d18:1/16:0)_C65H117N3O27	NF	Gangliosides	Sphingolipids	2.14	0.0679215	1.7	0.142462	2.15	0.00891103
N4480	1426.85	9.17539	7328_([M-H]-)_NeuGc-GM2(d18:1/20:0)_C69H125N3O27	NF	Gangliosides	Sphingolipids	0.93	0.713745	0.99	0.799276	0.98	0.848815
N4494	1452.87	9.30057	7329_([M-H]-)_NeuGc-GM2(d18:1/22:1)_C71H127N3O27	NF	Gangliosides	Sphingolipids	0.87	0.741774	0.38	0.050235	0.5	0.019198
N4497	1454.88	9.85865	7330_([M-H]-)_NeuGc-GM2(d18:1/22:0)_C71H129N3O27	NF	Gangliosides	Sphingolipids	0.95	0.797181	0.77	0.939498	1.02	0.814798
N4514	1480.9	9.93984	7331_([M-H]-)_NeuGc-GM2(d18:1/24:1)_C73H131N3O27	NF	Gangliosides	Sphingolipids	1.49	0.350728	1	0.656857	1.37	0.122766
N4517	1482.91	10.5465	7332_([M-H]-)_NeuGc-GM2(d18:1/24:0)_C73H133N3O27	NF	Gangliosides	Sphingolipids	1.63	0.223369	1.63	0.159122	2.31	0.00224747
P3209	784.667	10.7611	330_([M+H]+)_HexCer (d18:1/C22:0)_C46H89O8N	NF	Hexosylceramides (HexCer)	Sphingolipids	0.51	0.0253578	0.83	0.980771	1.32	0.37532
P3426	810.683	10.8581	335_([M+H]+)_HexCer (d18:1/C24:1)_C48H91O8N	NF	Hexosylceramides (HexCer)	Sphingolipids	0.75	0.441191	0.74	0.758158	1.39	0.122392
P2386	675.544	8.00561	714_([M+H]+)_SM (d18:1/C14:0)_C37H75N2O6P	CHEBI:64586	Sphingomyelins (SM)	Sphingolipids	0.72	0.331111	0.87	0.975776	1.52	0.237315
P2492	689.56	8.32795	716_([M+H]+)_SM (d18:1/C15:0)_C38H77N2O6P	CHEBI:64585	Sphingomyelins (SM)	Sphingolipids	0.76	0.503165	0.97	0.720732	1.92	0.115206
P2601	703.575	8.65035	718_([M+H]+)_SM (d18:1/C16:0)_C39H79N2O6P	CHEBI:72514	Sphingomyelins (SM)	Sphingolipids	0.78	0.486076	0.97	0.664906	1.84	0.124909
P2587	701.559	8.19642	719_([M+H]+)_SM (d18:1/C16:1)_C39H77N2O6P	CHEBI:64587	Sphingomyelins (SM)	Sphingolipids	0.72	0.359022	0.9	0.798033	1.71	0.180149
P2698	717.591	8.99441	720_([M+H]+)_SM (d18:1/C17:0)_C40H81N2O6P	NF	Sphingomyelins (SM)	Sphingolipids	0.77	0.504569	1	0.587087	2.47	0.118658
P2679	715.576	8.56011	721_([M+H]+)_SM (d18:1/C17:1)_C40H79N2O6P	NF	Sphingomyelins (SM)	Sphingolipids	0.65	0.395557	0.81	0.744877	2.1	0.147496
P2816	731.606	9.29968	722_([M+H]+)_SM (d18:1/C18:0)_C41H83N2O6P	CHEBI:72518	Sphingomyelins (SM)	Sphingolipids	0.69	0.254853	1.11	0.537065	2.92	0.0436483
P2795	729.591	8.89208	723_([M+H]+)_SM (d18:1/C18:1)_C41H81N2O6P	CHEBI:72519	Sphingomyelins (SM)	Sphingolipids	0.68	0.269826	0.95	0.699828	2.43	0.0888468
P2926	745.622	9.69865	724_([M+H]+)_SM (d18:1/C19:0)_C42H85N2O6P	CHEBI:85759	Sphingomyelins (SM)	Sphingolipids	0.55	0.183963	0.84	0.959679	1.88	0.186913
P3013	759.638	10.0305	726_([M+H]+)_SM (d18:1/C20:0)_C43H87N2O6P	CHEBI:72523	Sphingomyelins (SM)	Sphingolipids	0.49	0.0350912	0.85	0.990154	1.59	0.429232
P3125	773.654	10.4721	728_([M+H]+)_SM (d18:1/C21:0)_C44H89N2O6P	CHEBI:85761	Sphingomyelins (SM)	Sphingolipids	0.41	0.038003	0.56	0.470076	1.3	0.588857
P3111	771.636	9.86309	729_([M+H]+)_SM (d18:1/C21:1)_C44H87N2O6P	CHEBI:85760	Sphingomyelins (SM)	Sphingolipids	0.44	0.09922	0.3	0.0558788	0.65	0.276463
P3231	787.669	10.7846	730_([M+H]+)_SM (d18:1/C22:0)_C45H91N2O6P	CHEBI:72528	Sphingomyelins (SM)	Sphingolipids	0.47	0.0268869	0.82	0.979356	1.55	0.333438
P3218	785.654	10.2877	731_([M+H]+)_SM (d18:1/C22:1)_C45H89N2O6P	CHEBI:72529	Sphingomyelins (SM)	Sphingolipids	0.51	0.101006	0.54	0.346523	1.08	0.933012
P3356	801.685	11.1684	732_([M+H]+)_SM (d18:1/C23:0)_C46H93N2O6P	CHEBI:83893	Sphingomyelins (SM)	Sphingolipids	0.76	0.419065	1.41	0.292233	3.15	0.00681063
P3341	799.669	10.6386	733_([M+H]+)_SM (d18:1/C23:1)_C46H91N2O6P	CHEBI:85762	Sphingomyelins (SM)	Sphingolipids	0.7	0.391673	0.98	0.710782	2.1	0.0754686
P3467	815.7	11.5176	734_([M+H]+)_SM (d18:1/C24:0)_C47H95N2O6P	CHEBI:72533	Sphingomyelins (SM)	Sphingolipids	0.75	0.363787	1.62	0.210236	3.22	0.0330527
P3453	813.685	10.8874	735_([M+H]+)_SM (d18:1/C24:1)_C47H93N2O6P	CHEBI:72534	Sphingomyelins (SM)	Sphingolipids	0.83	0.576489	1.12	0.515272	1.96	0.0753932
P3580	829.716	11.8632	736_([M+H]+)_SM (d18:1/C25:0)_C48H97N2O6P	NF	Sphingomyelins (SM)	Sphingolipids	0.85	0.685718	1.97	0.111059	4.48	0.00170743
P3558	827.701	11.2854	737_([M+H]+)_SM (d18:1/C25:1)_C48H95N2O6P	NF	Sphingomyelins (SM)	Sphingolipids	1.13	0.624529	2.24	0.0720744	5.2	0.0103149
P3195	783.638	9.73615	748_([M+H]+)_SM (d18:2/C22:1)_C45H87N2O6P	CHEBI:72530	Sphingomyelins (SM)	Sphingolipids	0.53	0.173818	0.32	0.0560921	0.58	0.152055
P3324	797.653	10.0778	749_([M+H]+)_SM (d18:2/C23:1)_C46H89N2O6P	NF	Sphingomyelins (SM)	Sphingolipids	0.7	0.47748	0.68	0.74154	1.6	0.277944
P3432	811.669	10.4303	750_([M+H]+)_SM (d18:2/C24:1)_C47H91N2O6P	CHEBI:72535	Sphingomyelins (SM)	Sphingolipids	0.83	0.670617	1.13	0.451955	2.26	0.0822359
N3131	794.552	9.44228	804_([M-H]-)_Su (d18:0/C17:0)_C41H81O11NS	NF	Sulfoglycosphingolipids (Su)	Sphingolipids	1.07	0.933276	1.05	0.924453	1.22	0.392343
N3774	892.65	11.0973	811_([M-H]-)_Su (d18:0/C24:0)_C48H95O11NS	NF	Sulfoglycosphingolipids (Su)	Sphingolipids	0.74	0.328189	0.21	0.229504	0.31	0.0236203
N3110	792.536	8.95264	820_([M-H]-)_Su (d18:1/C17:0)_C41H79O11NS	NF	Sulfoglycosphingolipids (Su)	Sphingolipids	0.98	0.793355	0.99	0.986844	1	0.987214
N3295	820.568	9.67082	824_([M-H]-)_Su (d18:1/C19:0)_C43H83O11NS	NF	Sulfoglycosphingolipids (Su)	Sphingolipids	0.89	0.482868	0.87	0.612418	0.78	0.172072
N3446	844.568	9.74693	847_([M-H]-)_Su (d18:2/C21:1)_C45H83O11NS	NF	Sulfoglycosphingolipids (Su)	Sphingolipids	0.84	0.380015	0.94	0.962847	0.84	0.590414
N2941	764.465	7.21201	867_([M-H]-)_Su (d18:1/C14:1(OH))_C38H71O12NS	NF	Sulfoglycosphingolipids (Su)	Sphingolipids	1.18	0.492618	0.65	0.627977	0.78	0.104567
N3308	822.534	8.36323	874_([M-H]-)_Su (d18:1/C18:0(OH))_C42H81O12NS	NF	Sulfoglycosphingolipids (Su)	Sphingolipids	0.57	0.131367	0.28	0.0501007	0.39	0.00666193
N3820	902.596	9.39406	902_([M-H]-)_Su (d18:2/C24:1(OH))_C48H89O12NS	NF	Sulfoglycosphingolipids (Su)	Sphingolipids	0.79	0.459329	0.21	0.00512017	0.13	0.00127784
P1911	614.587	15.3958	6802_([M+NH4]+)_14:0 Cholesteryl ester_C41H72O2	CHEBI:84304	Cholesteryl Esters (Chol.Ester)	Steroids and Steroid Derivatives	0.55	0.173508	0.45	0.298959	1.05	0.972765
P2014	628.603	15.8135	6804_([M+NH4]+)_15:0 Cholesteryl ester_C42H74O2	CHEBI:84318	Cholesteryl Esters (Chol.Ester)	Steroids and Steroid Derivatives	0.45	0.155123	0.34	0.331148	1.2	0.905478
P2115	642.619	16.2276	6806_([M+NH4]+)_16:0 Cholesteryl ester_C43H76O2	CHEBI:3663	Cholesteryl Esters (Chol.Ester)	Steroids and Steroid Derivatives	0.5	0.165032	0.66	0.970753	2.01	0.135244
P2102	640.603	15.6465	6807_([M+NH4]+)_16:1 Cholesteryl ester_C43H74O2	CHEBI:84323	Cholesteryl Esters (Chol.Ester)	Steroids and Steroid Derivatives	0.54	0.21269	0.68	0.344811	0.96	0.857733
P2087	638.588	15.0294	6808_([M+NH4]+)_16:2 Cholesteryl ester_C43H72O2	CHEBI:89566	Cholesteryl Esters (Chol.Ester)	Steroids and Steroid Derivatives	0.61	0.257434	0.78	0.86859	1.29	0.444021
P2254	656.634	16.6327	6809_([M+NH4]+)_17:0 Cholesteryl ester_C44H78O2	CHEBI:84326	Cholesteryl Esters (Chol.Ester)	Steroids and Steroid Derivatives	0.6	0.274638	0.85	0.898453	1.96	0.256868
P2239	654.619	16.0125	6810_([M+NH4]+)_17:1 Cholesteryl ester_C44H76O2	CHEBI:84329	Cholesteryl Esters (Chol.Ester)	Steroids and Steroid Derivatives	0.56	0.259289	0.62	0.499843	1.27	0.527522
P2347	670.65	17.0093	6811_([M+NH4]+)_18:0 Cholesteryl ester_C45H80O2	CHEBI:82750	Cholesteryl Esters (Chol.Ester)	Steroids and Steroid Derivatives	0.77	0.651249	3.09	0.0399006	7.29	0.0285542
P2332	668.634	16.4852	6812_([M+NH4]+)_18:1 Cholesteryl ester_C45H78O2	CHEBI:46898	Cholesteryl Esters (Chol.Ester)	Steroids and Steroid Derivatives	0.71	0.661035	1.4	0.242185	3.37	0.0560552
P2315	666.619	15.9047	6813_([M+NH4]+)_18:2 Cholesteryl ester_C45H76O2	CHEBI:41509	Cholesteryl Esters (Chol.Ester)	Steroids and Steroid Derivatives	0.54	0.190538	0.62	0.421697	1.08	0.962481
P2304	664.603	15.347	6814_([M+NH4]+)_18:3 Cholesteryl ester_C45H74O2	CHEBI:84341	Cholesteryl Esters (Chol.Ester)	Steroids and Steroid Derivatives	0.61	0.247121	0.81	0.95511	1.5	0.27537
P2459	684.665	16.2272	6815_([M+NH4]+)_19:0 Cholesteryl ester_C46H82O2	NF	Cholesteryl Esters (Chol.Ester)	Steroids and Steroid Derivatives	0.63	0.200084	0.83	0.933124	1.62	0.204034
P2560	696.666	17.1954	6817_([M+NH4]+)_20:1 Cholesteryl ester_C47H82O2	CHEBI:88795	Cholesteryl Esters (Chol.Ester)	Steroids and Steroid Derivatives	0.66	0.301236	0.93	0.901533	1.74	0.138387
P2540	694.65	16.6107	6818_([M+NH4]+)_20:2 Cholesteryl ester_C47H80O2	CHEBI:88775	Cholesteryl Esters (Chol.Ester)	Steroids and Steroid Derivatives	0.44	0.0578317	0.46	0.224997	0.91	0.741612
P2541	694.649	15.9037	6818_([M+NH4]+)_20:2 Cholesteryl ester_C47H80O2	CHEBI:88775	Cholesteryl Esters (Chol.Ester)	Steroids and Steroid Derivatives	0.67	0.210962	0.71	0.441519	0.95	0.712556
P2523	692.634	16.1782	6819_([M+NH4]+)_20:3 Cholesteryl ester_C47H78O2	CHEBI:88752	Cholesteryl Esters (Chol.Ester)	Steroids and Steroid Derivatives	0.43	0.0770844	0.29	0.0714957	0.61	0.213817
P2506	690.619	15.668	6820_([M+NH4]+)_20:4 Cholesteryl ester_C47H76O2	CHEBI:82751	Cholesteryl Esters (Chol.Ester)	Steroids and Steroid Derivatives	0.53	0.177477	0.68	0.611103	1.08	0.998245
P2485	688.603	15.1039	6821_([M+NH4]+)_20:5 Cholesteryl ester_C47H74O2	CHEBI:84969	Cholesteryl Esters (Chol.Ester)	Steroids and Steroid Derivatives	0.5	0.0917232	0.49	0.089904	0.71	0.241211
P2771	724.697	16.4911	6822_([M+NH4]+)_22:1 Cholesteryl ester_C49H86O2	CHEBI:88753	Cholesteryl Esters (Chol.Ester)	Steroids and Steroid Derivatives	0.83	0.67647	1.52	0.191553	2.96	0.0465233
P2749	722.681	16.2299	6823_([M+NH4]+)_22:2 Cholesteryl ester_C49H84O2	CHEBI:88774	Cholesteryl Esters (Chol.Ester)	Steroids and Steroid Derivatives	0.51	0.0868441	0.54	0.193507	0.92	0.989072
P2748	722.681	15.905	6823_([M+NH4]+)_22:2 Cholesteryl ester_C49H84O2	CHEBI:88774	Cholesteryl Esters (Chol.Ester)	Steroids and Steroid Derivatives	0.58	0.188305	0.67	0.423557	1.05	0.96881
P2714	718.65	16.392	6824_([M+NH4]+)_22:4 Cholesteryl ester_C49H80O2	NF	Cholesteryl Esters (Chol.Ester)	Steroids and Steroid Derivatives	0.42	0.0587164	0.47	0.331219	0.95	0.858417
P2715	718.649	15.6655	6824_([M+NH4]+)_22:4 Cholesteryl ester_C49H80O2	NF	Cholesteryl Esters (Chol.Ester)	Steroids and Steroid Derivatives	0.58	0.143587	0.6	0.469467	1.06	0.940289
P2677	714.619	15.4919	6826_([M+NH4]+)_22:6 Cholesteryl ester_C49H76O2	CHEBI:74102	Cholesteryl Esters (Chol.Ester)	Steroids and Steroid Derivatives	0.48	0.111372	0.35	0.24649	0.83	0.499359
P2643	708.665	15.9035	6828_([M+NH4]+)_lanosteryl oleate_C48H82O2	CHEBI:52382	Cholesteryl Esters (Chol.Ester)	Steroids and Steroid Derivatives	0.7	0.178976	0.79	0.460223	0.98	0.834205
P2433	680.634	16.2295	6829_([M+NH4]+)_lanosteryl palmitoleate_C46H78O2	CHEBI:52383	Cholesteryl Esters (Chol.Ester)	Steroids and Steroid Derivatives	0.42	0.0721907	0.48	0.304102	1.1	0.741925
P542	369.352	7.81608	6701_([M+H-H2O]+)_free cholesterol_C27H46O	CHEBI:16113	Sterols (Sterol)	Steroids and Steroid Derivatives	0.81	0.365876	0.99	0.906977	1.31	0.128341
P544	369.352	5.60604	6701_([M+H-H2O]+)_free cholesterol_C27H46O	CHEBI:16113	Sterols (Sterol)	Steroids and Steroid Derivatives	0.87	0.46977	0.99	0.784642	1.17	0.250115
